# Supplementary material for: Myeloid cell-expressed MNDA enhances M2 polarization to facilitate the metastasis of hepatocellular carcinoma
Source: Research Square preprint supplement (doi:10.21203/rs.3.rs-3480636/v1), 2023-10-28
Supplement: Supplementary file 1 [file 17736242b08c68ebb221bf48.xlsx]

## Sheet: Sheet1
PG.ProteinGroups	PG.Genes	PG.Organisms	PG.ProteinDescriptions	[1] 48002_FAIMS_120min_75um_DIA_PDPM_MYR_1_M2-shCtrl_1_20230315.raw.PG.Quantity	[2] 48002_FAIMS_120min_75um_DIA_PDPM_MYR_2_M2-shCtrl_2_20230315.raw.PG.Quantity	[3] 48002_FAIMS_120min_75um_DIA_PDPM_MYR_3_M2-shCtrl_3_20230315.raw.PG.Quantity	[4] 48002_FAIMS_120min_75um_DIA_PDPM_MYR_4_M2-shMNDA1_1_20230315.raw.PG.Quantity	[5] 48002_FAIMS_120min_75um_DIA_PDPM_MYR_5_M2-shMNDA1_2_20230315.raw.PG.Quantity	[6] 48002_FAIMS_120min_75um_DIA_PDPM_MYR_6_M2-shMNDA1_3_20230315.raw.PG.Quantity	[7] 48002_FAIMS_120min_75um_DIA_PDPM_MYR_7_M2-shMNDA2_1_20230315.raw.PG.Quantity	[8] 48002_FAIMS_120min_75um_DIA_PDPM_WYR_8_M2-shMNDA2_2_20230315.raw.PG.Quantity	[9] 48002_FAIMS_120min_75um_DIA_PDPM_MYR_9_M2-shMNDA2_3_20230315.raw.PG.Quantity
A0A075B6J9;P01699;P01700;P01703;P01706;P01709	IGLV2-18;IGLV1-44;IGLV1-47;IGLV1-40;IGLV2-11;IGLV2-8	Homo sapiens	Immunoglobulin lambda variable 2-18;Immunoglobulin lambda variable 1-44;Immunoglobulin lambda variable 1-47;Immunoglobulin lambda variable 1-40;Immunoglobulin lambda variable 2-11;Immunoglobulin lambda variable 2-8	4112.1	3061.3	3263.59	3565.94	4161.56	3349.85	6732.33	5758.37	6606.65
A0AVI2	FER1L5	Homo sapiens	Fer-1-like protein 5	22424.7	18146.9	3466.61	23441.4	16031.2	11350.5	NaN	11918.4	21410.5
A5D8V6	VPS37C	Homo sapiens	Vacuolar protein sorting-associated protein 37C	1961.27	1605.18	2994.5	4845.23	6573.7	5455.67	4561.32	6152	6983.6
A5YKK6	CNOT1	Homo sapiens	CCR4-NOT transcription complex subunit 1	5995.18	5671.78	5282.19	5444.5	4347.95	4383.51	4934.81	5128.28	5366.13
A6NC86	PINLYP	Homo sapiens	phospholipase A2 inhibitor and Ly6/PLAUR domain-containing protein	1008.71	856.072	1816.88	3779.78	3988.28	2140.8	5480.13	6808.73	5122.99
A6NI72;P14598	NCF1B;NCF1	Homo sapiens	Putative neutrophil cytosol factor 1B;Neutrophil cytosol factor 1	22031.8	21950.7	30075.2	5130.31	5633.36	6004.36	6846.28	9790.54	8903.71
A6NJZ3	OR6C65	Homo sapiens	Olfactory receptor 6C65	NaN	1143.6	2490.16	2.69702	1035.59	785.099	1.58617	1.95101	1.38679
B5ME19;Q99613	EIF3CL;EIF3C	Homo sapiens	Eukaryotic translation initiation factor 3 subunit C-like protein;Eukaryotic translation initiation factor 3 subunit C	14458.8	15008.8	14355.1	14793.9	12594.5	13141.7	16927.1	15558.9	19290.3
B9A064	IGLL5	Homo sapiens	Immunoglobulin lambda-like polypeptide 5	42842.4	40324.6	45592	85815.2	89650.7	79528.6	62514.7	57951.3	51744.8
F8WCM5;P01308	INS-IGF2;INS	Homo sapiens	Insulin, isoform 2;Insulin	5027.03	NaN	1.18346	1.50175	NaN	NaN	1.31722	NaN	NaN
O00148;Q13838	DDX39A;DDX39B	Homo sapiens	ATP-dependent RNA helicase DDX39A;Spliceosome RNA helicase DDX39B	21609.3	17729.3	20844.1	17100.5	14905.1	15884.1	14322.8	17010.3	12524.3
O00160	MYO1F	Homo sapiens	Unconventional myosin-If	3840.49	3878.27	3686.94	2793.84	3482.29	1407.34	4138.02	4589.57	4935
O00161	SNAP23	Homo sapiens	Synaptosomal-associated protein 23	4131.31	2886.47	3027.42	3944.21	3369.71	3191.53	2909.63	2256.42	2510.15
O00182	LGALS9	Homo sapiens	Galectin-9	8029.56	10913.4	10909.5	6428.58	5211.6	4693.55	38050.9	36021.6	42019.5
O00203	AP3B1	Homo sapiens	AP-3 complex subunit beta-1	2053.02	1656.5	2529.21	591.911	983.311	NaN	1334.42	1545.44	1339.19
O00231	PSMD11	Homo sapiens	26S proteasome non-ATPase regulatory subunit 11	106121	108984	119051	121059	115790	128305	106690	111130	85404.9
O00232	PSMD12	Homo sapiens	26S proteasome non-ATPase regulatory subunit 12	38887.2	53502.5	46353.7	52576.4	49074.3	53910.7	42538.4	47975	47383.4
O00267	SUPT5H	Homo sapiens	Transcription elongation factor SPT5	2302.81	2395.42	3123.67	26.1123	1015.47	969.091	2099.01	1725.94	1394.49
O00299	CLIC1	Homo sapiens	Chloride intracellular channel protein 1	114141	117651	114727	83915.8	94673.2	85069.3	102015	86780.4	102104
O00303	EIF3F	Homo sapiens	Eukaryotic translation initiation factor 3 subunit F	7984.11	7781.28	8622.26	6033.05	5429.99	7738.27	7971.84	6881.46	5238.38
O00308	WWP2	Homo sapiens	NEDD4-like E3 ubiquitin-protein ligase WWP2	NaN	1085.37	287.311	1220.14	138.02	175.893	2637.1	5083.74	2705.61
O00391	QSOX1	Homo sapiens	Sulfhydryl oxidase 1	22148.3	22045.3	21405.9	10610.1	10549.4	10747.5	4034.11	6584.16	4192.99
O00429	DNM1L	Homo sapiens	Dynamin-1-like protein	2970.76	2547.16	3166.17	5337.33	5949.54	6654.38	818.286	1797.32	1710.36
O00468	AGRN	Homo sapiens	Agrin	7400.96	6060.11	6502.96	23689.9	24544.5	23001.5	14845.3	12383.4	11477
O00487	PSMD14	Homo sapiens	26S proteasome non-ATPase regulatory subunit 14	95037.9	92749.6	92562.3	88738.7	47142	46137.1	1542.74	28262.2	27872.1
O00506;Q9P289;Q9Y6E0	STK25;STK26;STK24	Homo sapiens	Serine/threonine-protein kinase 25;Serine/threonine-protein kinase 26;Serine/threonine-protein kinase 24	1808.29	2238.13	1421.16	2051.25	1508.38	1350.6	1308.43	1835.01	1638.35
O00533	CHL1	Homo sapiens	Neural cell adhesion molecule L1-like protein	3334.59	3559.23	2140.83	4951.19	4289.64	2568.14	4420.82	5040.42	4376.34
O00560	SDCBP	Homo sapiens	Syntenin-1	143970	156780	141826	238149	254074	237677	239023	231182	250084
O00567	NOP56	Homo sapiens	Nucleolar protein 56	5076.13	3612.64	3969.9	3085.86	3572.28	1668.05	8014.48	7302.31	7469.94
O00571	DDX3X	Homo sapiens	ATP-dependent RNA helicase DDX3X	8959.96	11092.8	7586.53	9714.17	8747.14	4625.77	2431.62	4626.29	2749.45
O00743	PPP6C	Homo sapiens	Serine/threonine-protein phosphatase 6 catalytic subunit	16935.6	12337.1	10203.7	363.173	7170.57	5390.25	4058.14	4513.21	3868.04
O00754	MAN2B1	Homo sapiens	Lysosomal alpha-mannosidase	NaN	976.013	1200.07	1417.51	3322.47	3439.72	1082.27	1793.5	NaN
O00763;Q13085	ACACB;ACACA	Homo sapiens	Acetyl-CoA carboxylase 2;Acetyl-CoA carboxylase 1	4395.01	3206.52	3792.98	4876.22	3930.11	1961.23	2299.04	1784.99	1364.18
O00764	PDXK	Homo sapiens	Pyridoxal kinase	3836.53	3790.74	3351.59	3395.33	2753.49	2727.53	3307.03	2970.06	4742.08
O14531	DPYSL4	Homo sapiens	Dihydropyrimidinase-related protein 4	19199.4	16469.8	16712.6	14436.4	13679.3	12875.7	8502.74	9693.65	8775.71
O14579	COPE	Homo sapiens	Coatomer subunit epsilon	6253.19	6901.67	5987.42	6204.63	5965.46	5601.49	7455.78	6631.84	7921.74
O14617	AP3D1	Homo sapiens	AP-3 complex subunit delta-1	3142.34	4808.97	3881.2	4014.05	3643.7	5075.39	8092.85	9511.48	NaN
O14672	ADAM10	Homo sapiens	Disintegrin and metalloproteinase domain-containing protein 10	12546.1	10178	12121.3	18070	17950.7	20013.5	8611.61	14882.5	10300.4
O14744	PRMT5	Homo sapiens	Protein arginine N-methyltransferase 5	17947.5	17045.6	16640.6	20814.4	16534.2	18821	12529.1	14537.9	15145.6
O14786	NRP1	Homo sapiens	Neuropilin-1	8364.57	8796.29	9071.13	13124.5	13521.5	14298.7	11399.4	11290.6	11727.5
O14807	MRAS	Homo sapiens	Ras-related protein M-Ras	3495.48	2714.72	3393.76	NaN	NaN	NaN	5483.34	4594.61	5631.9
O14818	PSMA7	Homo sapiens	Proteasome subunit alpha type-7	49007.9	44580.9	46717.7	55788.9	47449	54781.7	62910.8	68147.3	74272.9
O14828	SCAMP3	Homo sapiens	Secretory carrier-associated membrane protein 3	6288.73	4296.26	4456.84	4057.33	3105.11	2994.96	5634.6	6001.77	8506.96
O14841	OPLAH	Homo sapiens	5-oxoprolinase	2364.55	2888.76	2735.3	2503.64	5025.71	4963.89	1220.5	NaN	1254.9
O14879	IFIT3	Homo sapiens	Interferon-induced protein with tetratricopeptide repeats 3	3621.42	3499.48	4520.11	3733.48	4057.33	3974.22	12316.2	10956.1	10140.1
O14924	RGS12	Homo sapiens	Regulator of G-protein signaling 12	12721.4	13507.4	12331.2	10274.6	11893.2	13436.5	6753.06	13549.2	16053.2
O14976	GAK	Homo sapiens	Cyclin-G-associated kinase	1963.94	2593.52	1529.16	NaN	1061.73	NaN	NaN	NaN	NaN
O14979	HNRNPDL	Homo sapiens	Heterogeneous nuclear ribonucleoprotein D-like	8191.94	6978.77	7810.33	9234.14	11417.6	11768.7	8477.78	10579.1	8955.6
O14980	XPO1	Homo sapiens	Exportin-1	3580.21	3738.63	4041.15	812.629	764.854	1215.48	1625.47	2944.17	1393.7
O15013	ARHGEF10	Homo sapiens	Rho guanine nucleotide exchange factor 10	2148.15	14925.8	7195.95	8854.49	13616.8	23004	NaN	NaN	NaN
O15031	PLXNB2	Homo sapiens	Plexin-B2	2285.49	2951.01	2772.07	1719.86	1486.47	1456.01	6266.09	7481.17	12812.5
O15118	NPC1	Homo sapiens	NPC intracellular cholesterol transporter 1	800.386	2078.51	2687.06	2894.33	1942.14	1809.95	10.6581	6.60109	710.134
O15126	SCAMP1	Homo sapiens	Secretory carrier-associated membrane protein 1	2281.55	2419.4	2162.22	1248.77	549.101	1160.47	5752.3	6436.57	5250.19
O15127	SCAMP2	Homo sapiens	Secretory carrier-associated membrane protein 2	3364.64	4385.48	4543.25	6583.79	6221.95	5524.08	6890.86	9789.57	8882.28
O15143	ARPC1B	Homo sapiens	Actin-related protein 2/3 complex subunit 1B	24296.4	25507.6	25493.1	23620.1	22821.3	23736.1	25412.1	24340.1	26663
O15144	ARPC2	Homo sapiens	Actin-related protein 2/3 complex subunit 2	7054.95	7875.29	8691.59	6072.01	5555.59	5062.11	7393.77	5648.09	7247.27
O15160	POLR1C	Homo sapiens	DNA-directed RNA polymerases I and III subunit RPAC1	3457.01	2496.88	3987.62	686.369	3059.62	2154.65	1233.04	629.521	2114.25
O15204	ADAMDEC1	Homo sapiens	ADAM DEC1	2304.97	2326	1231.95	9436.11	8903.46	9384.26	5200.47	7630.13	6030.68
O15232	MATN3	Homo sapiens	Matrilin-3	3851.76	1955.19	2947.36	3521.65	3577.12	3387.58	3939.75	3295.38	3453.58
O15269	SPTLC1	Homo sapiens	Serine palmitoyltransferase 1	2579.14	1740.15	2279.18	2087.73	2750.22	1318.4	6934.94	6402.92	5474.98
O15294	OGT	Homo sapiens	UDP-N-acetylglucosamine--peptide N-acetylglucosaminyltransferase 110 kDa subunit	NaN	1648	827.098	2763.21	703.127	NaN	871.496	NaN	NaN
O15371	EIF3D	Homo sapiens	Eukaryotic translation initiation factor 3 subunit D	15574.4	16396.5	18107.3	9715.38	16342.5	16937.6	16007.2	14738.7	16858.6
O15372	EIF3H	Homo sapiens	Eukaryotic translation initiation factor 3 subunit H	3727.65	4307.4	4576.9	3650.3	4676.54	4066.04	5212.25	4058.76	3078.33
O15400	STX7	Homo sapiens	Syntaxin-7	2668.18	4466.84	3985.8	6832.36	6742.36	7260.68	14565.6	10958.8	13762.8
O15427	SLC16A3	Homo sapiens	Monocarboxylate transporter 4	4269.29	4292.28	4715.7	5478.11	4571.41	4620.4	4983.45	5955.55	6237.72
O15460	P4HA2	Homo sapiens	Prolyl 4-hydroxylase subunit alpha-2	2563.65	1334.62	2546.25	757.362	3538.49	3656.52	4081.31	3170.3	989.327
O15511	ARPC5	Homo sapiens	Actin-related protein 2/3 complex subunit 5	7944.18	8877.88	4729.01	7901.87	9511.04	3993.93	3159.02	18.6177	19.9484
O15523	DDX3Y	Homo sapiens	ATP-dependent RNA helicase DDX3Y	6896.13	8317.48	8351.06	8200.57	7149.62	6992.48	7372.86	6660.92	6316.38
O43143	DHX15	Homo sapiens	ATP-dependent RNA helicase DHX15	26312.4	22891.6	27335.9	18158.5	17497.1	19376.9	24936.7	24790.6	28789.2
O43149	ZZEF1	Homo sapiens	Zinc finger ZZ-type and EF-hand domain-containing protein 1	3022.13	2426.9	2527.9	3534.32	4796.72	5068.71	1505.78	3316.78	3796.2
O43172	PRPF4	Homo sapiens	U4/U6 small nuclear ribonucleoprotein Prp4	3813.35	5272.06	3809.07	2315.68	2120.34	2666.95	3563.29	2124.84	1764.88
O43175	PHGDH	Homo sapiens	D-3-phosphoglycerate dehydrogenase	21170.6	21287.6	21761.8	22790.3	17870.5	18569.5	8439.6	7280.63	9470.35
O43242	PSMD3	Homo sapiens	26S proteasome non-ATPase regulatory subunit 3	15796.2	19575	17283.1	17533.7	18479.2	18140.1	10688.4	10033.7	11009.4
O43310	CTIF	Homo sapiens	CBP80/20-dependent translation initiation factor	13262.9	15865	19255.4	22938.5	25454.9	18288.8	21200.2	16392.1	28389.2
O43312	MTSS1	Homo sapiens	Protein MTSS 1	1277.79	1259.23	2058.08	1053.25	1328.31	1349.93	NaN	1.13478	536.607
O43324	EEF1E1	Homo sapiens	Eukaryotic translation elongation factor 1 epsilon-1	54135.1	63287.5	65710.7	51811.5	34395.8	35544.1	43888.5	42544.2	46031
O43379	WDR62	Homo sapiens	WD repeat-containing protein 62	2343.66	3363.65	7596.5	1843.96	8532.6	5550.58	8886.14	NaN	84.3314
O43396	TXNL1	Homo sapiens	Thioredoxin-like protein 1	2985.81	3351.9	3787.72	2791.47	2466.3	2610.54	4276.82	3388.86	3759.03
O43399	TPD52L2	Homo sapiens	Tumor protein D54	NaN	208.882	545.82	NaN	341.796	NaN	608.612	1012.77	699.852
O43488	AKR7A2	Homo sapiens	Aflatoxin B1 aldehyde reductase member 2	2779.55	2958.5	2321.83	1.08055	1047.24	514.515	NaN	NaN	NaN
O43491	EPB41L2	Homo sapiens	Band 4.1-like protein 2	2748.16	3143.71	2315.06	1662.77	1985.12	2160.82	2487.88	2416.5	2545.09
O43505	B4GAT1	Homo sapiens	Beta-1,4-glucuronyltransferase 1	31609.3	24220.4	27526.2	37592.3	27463.2	31830.9	28673.7	35524	28516.1
O43557	TNFSF14	Homo sapiens	Tumor necrosis factor ligand superfamily member 14	215159	152546	161982	218916	376754	272296	406065	1238.35	383884
O43597	SPRY2	Homo sapiens	Protein sprouty homolog 2	7592.21	6641.91	7460.3	10297.7	9066.62	9292.17	21751.2	20894.3	25260.2
O43684	BUB3	Homo sapiens	Mitotic checkpoint protein BUB3	6798.19	6605.29	6866.97	4811	6010.21	7369.38	4859.08	3955.36	4716.87
O43707	ACTN4	Homo sapiens	Alpha-actinin-4	32634.5	33637.1	35339.6	37440.8	32276.6	27823.3	31449.7	30689.4	32664.9
O43747	AP1G1	Homo sapiens	AP-1 complex subunit gamma-1	5027.08	3851.63	2454.89	3902.72	3163.08	3443.76	2869.69	1838.65	3170.48
O43760	SYNGR2	Homo sapiens	Synaptogyrin-2	16673.1	19085.3	21759.2	28206.9	17661.7	20479.5	24961.5	23357.4	21047.7
O43776	NARS1	Homo sapiens	Asparagine--tRNA ligase, cytoplasmic	8707.06	10781.2	9973.26	4309.85	4198.73	5824.47	2849.11	4061.97	2082.38
O43795	MYO1B	Homo sapiens	Unconventional myosin-Ib	191.468	388.195	173.053	5225.22	5664.24	2320.78	NaN	NaN	1127.66
O43865	AHCYL1	Homo sapiens	S-adenosylhomocysteine hydrolase-like protein 1	28327.6	33892.6	32867.7	13470.6	21097.1	21200.4	10520.3	6981.04	3435.58
O43914	TYROBP	Homo sapiens	TYRO protein tyrosine kinase-binding protein	10072.9	10633.5	9782.23	10601.1	12698.9	11692	33857	32850.9	33437
O60264;P28370	SMARCA5;SMARCA1	Homo sapiens	SWI/SNF-related matrix-associated actin-dependent regulator of chromatin subfamily A member 5;Probable global transcription activator SNF2L1	2125.48	2447.95	3289.01	2477.07	3419.88	3178.71	2395.88	2138.15	3162.32
O60361;P22392	NME2P1;NME2	Homo sapiens	Putative nucleoside diphosphate kinase;Nucleoside diphosphate kinase B	10395.7	13453.2	12383.3	14629	13288.3	12594.6	14257.8	11122	10695.5
O60462	NRP2	Homo sapiens	Neuropilin-2	9063.48	8896.44	7991.6	11271.1	11135.3	7785.62	2993.36	1823.33	2892.44
O60488	ACSL4	Homo sapiens	Long-chain-fatty-acid--CoA ligase 4	6697.16	6871.11	5846.12	6829.28	4672.49	3958.49	1902.37	655.734	4385.11
O60493	SNX3	Homo sapiens	Sorting nexin-3	8008.08	6926.86	5115.03	8886.82	10172	8689.73	28796.8	27463.6	25260.9
O60502	OGA	Homo sapiens	Protein O-GlcNAcase	3850.45	5173.98	4608.84	9867.66	6147.32	7246.5	5462.3	5396.62	5931.07
O60506	SYNCRIP	Homo sapiens	Heterogeneous nuclear ribonucleoprotein Q	1551.49	3963.3	3279.78	3370.24	3744.08	3331.25	3079.71	1823.85	569.096
O60568	PLOD3	Homo sapiens	Multifunctional procollagen lysine hydroxylase and glycosyltransferase LH3	2646.94	1908.48	1400.79	3165.22	3265.01	3235.68	1893.02	1821.8	1595.26
O60701	UGDH	Homo sapiens	UDP-glucose 6-dehydrogenase	5903.79	6530.13	6754.85	6837.05	6750.48	6766.64	9425.19	7824.67	5931.16
O60711	LPXN	Homo sapiens	Leupaxin	5964.86	2894.23	5080.27	5461.6	3997.34	7328.59	8793.98	9230.23	8294.01
O60749	SNX2	Homo sapiens	Sorting nexin-2	4391.26	4489.71	3887.98	2190.6	2368.45	2419.45	4760.63	4458.45	5817.22
O60763	USO1	Homo sapiens	General vesicular transport factor p115	4848.43	6144.6	5321.74	3667.56	3285.38	2053.94	3385.68	3925.78	4360.07
O60784	TOM1	Homo sapiens	Target of Myb protein 1	2008.83	2476.99	2897.35	3602.22	2120.2	3497.83	5491.68	5841.07	5844.56
O60814;P57053;P58876;P62807;Q5QNW6;Q93079;Q99877;Q99879;Q99880	H2BC12;H2BC12L;H2BC5;H2BC4;H2BC18;H2BC9;H2BC15;H2BC14;H2BC13	Homo sapiens	Histone H2B type 1-K;Histone H2B type F-S;Histone H2B type 1-D;Histone H2B type 1-C/E/F/G/I;Histone H2B type 2-F;Histone H2B type 1-H;Histone H2B type 1-N;Histone H2B type 1-M;Histone H2B type 1-L	60142.7	65542.7	56258.4	45765.9	39878.5	43652.4	47691.2	26647.3	54169.8
O60826	CCDC22	Homo sapiens	Coiled-coil domain-containing protein 22	4401.76	5476.51	4586.01	6587.73	2838.67	4686.68	3327.34	4373.91	4319.53
O60832	DKC1	Homo sapiens	H/ACA ribonucleoprotein complex subunit DKC1	520.964	1425.48	1685.66	NaN	959.686	907.668	615.081	1824.51	841.656
O60884	DNAJA2	Homo sapiens	DnaJ homolog subfamily A member 2	2657.63	4359.21	3703.21	4916.96	1874.22	3114.81	1915.48	2730.57	3281.74
O75083	WDR1	Homo sapiens	WD repeat-containing protein 1	38336.5	39501.6	40696.8	42138.5	39692.6	44979.2	50679.2	49415.7	51398.5
O75110	ATP9A	Homo sapiens	Probable phospholipid-transporting ATPase IIA	662.764	NaN	NaN	NaN	302.53	NaN	NaN	1249.79	1362.3
O75131	CPNE3	Homo sapiens	Copine-3	3638.5	3851.71	3636.18	3072.13	2449.4	2205.16	1453.77	2037.43	1514.42
O75147	OBSL1	Homo sapiens	Obscurin-like protein 1	23483.6	21077.9	19353.5	42535.8	30785.7	34312	19495.7	21751.9	22370.1
O75165	DNAJC13	Homo sapiens	DnaJ homolog subfamily C member 13	1321.5	2481.3	1734.11	2487.69	2505.65	2840.45	1984.07	2606.79	2085
O75340	PDCD6	Homo sapiens	Programmed cell death protein 6	396.2	933.762	NaN	1186.88	1357.23	3113.32	1137.05	3460.82	4455.67
O75348;O95670	ATP6V1G1;ATP6V1G2	Homo sapiens	V-type proton ATPase subunit G 1;V-type proton ATPase subunit G 2	8873.03	9735.4	7675.49	6598.65	7305.1	9938.75	7983.65	8484.63	8650.92
O75351	VPS4B	Homo sapiens	Vacuolar protein sorting-associated protein 4B	10034.8	10858.6	7374.34	8652	7506.05	6544.3	7249.41	5782.66	7184.5
O75367	MACROH2A1	Homo sapiens	Core histone macro-H2A.1	51215.2	49664	47171.4	23937.9	28960.1	22314.9	52500.4	37175	37053.4
O75369	FLNB	Homo sapiens	Filamin-B	2367.05	2655.68	2413.6	4039.82	3145.82	1470.37	420.315	508.143	97.9005
O75382	TRIM3	Homo sapiens	Tripartite motif-containing protein 3	84530.3	70370.2	50604.6	98056.4	25112.4	86868.4	51213.2	84782.8	80098.7
O75390	CS	Homo sapiens	Citrate synthase, mitochondrial	9254.25	11183.6	9739.56	5963.43	8219.39	9546.21	15261.2	13124.6	13197.1
O75396	SEC22B	Homo sapiens	Vesicle-trafficking protein SEC22b	5104.66	6120.27	6686.62	3332.45	3013.1	3106.16	11493.5	12048	11451.9
O75400	PRPF40A	Homo sapiens	Pre-mRNA-processing factor 40 homolog A	3782.2	9443.37	5214.63	1799.47	NaN	5250.92	4571.59	4731.41	NaN
O75427	LRCH4	Homo sapiens	Leucine-rich repeat and calponin homology domain-containing protein 4	8277.14	5806.18	6997.43	5308.18	7651.52	5081.45	5503.21	10657.2	5399.06
O75439	PMPCB	Homo sapiens	Mitochondrial-processing peptidase subunit beta	5064.48	3605.69	4932.93	3422.04	3486.78	1280.32	7910.34	9062.09	9409.4
O75533	SF3B1	Homo sapiens	Splicing factor 3B subunit 1	2172.16	2474.28	2541.33	2023.49	1388.33	1058.63	2124.86	2277.69	1331.41
O75534	CSDE1	Homo sapiens	Cold shock domain-containing protein E1	6478.2	6030.33	7714.26	5876.44	5780.01	3357.47	4882.75	3409.78	2877.31
O75608	LYPLA1	Homo sapiens	Acyl-protein thioesterase 1	16346.3	13757.6	15815.7	16143.7	12696.3	15519.4	17038.6	15612.6	15676.7
O75643	SNRNP200	Homo sapiens	U5 small nuclear ribonucleoprotein 200 kDa helicase	23789.4	21609.2	23794.4	19679.3	16177.4	17300.7	16829.2	15531.7	18431.9
O75695	RP2	Homo sapiens	Protein XRP2	5081.22	3202.89	3689.35	9051.23	3051.07	4078.81	6515.78	6291.59	11092.9
O75832	PSMD10	Homo sapiens	26S proteasome non-ATPase regulatory subunit 10	14064.3	12529.4	11668.8	8568.44	5791.23	5843.4	2221.9	3690.05	3753.15
O75844	ZMPSTE24	Homo sapiens	CAAX prenyl protease 1 homolog	4499.6	3679.34	3137.03	9862.2	9731.61	4448.14	3920.13	6460.42	4187.54
O75874	IDH1	Homo sapiens	Isocitrate dehydrogenase [NADP] cytoplasmic	12132.5	10754.5	10678.9	8126.35	7734.56	6483.54	19033.2	23100.4	21718.3
O75891	ALDH1L1	Homo sapiens	Cytosolic 10-formyltetrahydrofolate dehydrogenase	33744.5	32781.7	30035.9	42813	33051.5	34390.5	49408.7	47411.1	47174.3
O75915	ARL6IP5	Homo sapiens	PRA1 family protein 3	5734.82	1605.99	8440.49	4.98511	1182.11	1781.16	NaN	NaN	NaN
O75955	FLOT1	Homo sapiens	Flotillin-1	NaN	755.538	232.24	NaN	1260	448.316	1776.07	1034.54	4.34685
O76094	SRP72	Homo sapiens	Signal recognition particle subunit SRP72	4857.3	4685.34	2442.87	1642.26	1861.8	1570.62	1334.66	1473.13	12.2419
O94776	MTA2	Homo sapiens	Metastasis-associated protein MTA2	4688.11	5886.95	5452.29	6936.88	2409.43	5426.67	6596.28	6172.4	6142.95
O94804	STK10	Homo sapiens	Serine/threonine-protein kinase 10	3505.56	1848.89	1566.25	496.408	1045.55	1515.7	2146.31	2702.91	2808.56
O94826	TOMM70	Homo sapiens	Mitochondrial import receptor subunit TOM70	1493.41	1917.41	2522.25	167.309	1608.09	178.016	NaN	NaN	1034.86
O94888	UBXN7	Homo sapiens	UBX domain-containing protein 7	1905.67	1827.91	1505.29	1959.37	NaN	1594.71	1160.77	1575.69	1373.07
O94973;O95782	AP2A2;AP2A1	Homo sapiens	AP-2 complex subunit alpha-2;AP-2 complex subunit alpha-1	20521.8	16871.3	20531.1	19543.6	21487.4	16402.8	27204.5	27643.3	17978.2
O94979	SEC31A	Homo sapiens	Protein transport protein Sec31A	7701.5	8213.27	8237.24	7863.85	6886.43	7196.09	5934.91	7418.69	6226.3
O95071	UBR5	Homo sapiens	E3 ubiquitin-protein ligase UBR5	2039	3172.53	4006.97	3308.87	3442.11	3255.67	3473.43	3962.99	4.52719
O95166;P60520;Q9H0R8	GABARAP;GABARAPL2;GABARAPL1	Homo sapiens	Gamma-aminobutyric acid receptor-associated protein;Gamma-aminobutyric acid receptor-associated protein-like 2;Gamma-aminobutyric acid receptor-associated protein-like 1	4817.31	7091.33	6430.25	12689.1	13332.8	12298.6	17439.6	16607.6	9797.32
O95197	RTN3	Homo sapiens	Reticulon-3	48555.9	47194.7	49222	58027.2	54891.9	65045.5	62255.7	58817.2	62518.2
O95292;Q9P0L0	VAPB;VAPA	Homo sapiens	Vesicle-associated membrane protein-associated protein B/C;Vesicle-associated membrane protein-associated protein A	3695.98	3915.76	4929.2	2303.99	2028.78	3634.68	6914.88	6911.38	7132.92
O95336	PGLS	Homo sapiens	6-phosphogluconolactonase	5423.47	4804.74	7047.22	6142.46	6159.16	4302.17	4962.62	4638.18	4724.13
O95340	PAPSS2	Homo sapiens	Bifunctional 3'-phosphoadenosine 5'-phosphosulfate synthase 2	638.469	571.499	872.725	4300.58	3519.88	3633.88	2914.8	1837.55	4316.19
O95352	ATG7	Homo sapiens	Ubiquitin-like modifier-activating enzyme ATG7	3278.44	2426.75	896.347	1.66279	640.239	546.106	1057.29	1923.3	NaN
O95373	IPO7	Homo sapiens	Importin-7	10219.6	7142.62	7689.46	5134.13	4261.08	4528.54	3813.42	4698.34	6980.79
O95379	TNFAIP8	Homo sapiens	Tumor necrosis factor alpha-induced protein 8	2564.47	1557.36	737.587	NaN	607.959	NaN	771.228	1016.47	940.953
O95477	ABCA1	Homo sapiens	Phospholipid-transporting ATPase ABCA1	7613.78	5536.13	4831.37	7278	10111.5	6520.38	19800.1	23083.4	16873.8
O95486	SEC24A	Homo sapiens	Protein transport protein Sec24A	5683.43	5438.56	6404.21	5986.57	2868.67	2461.64	4418.57	3478.34	6095.5
O95497	VNN1	Homo sapiens	Pantetheinase	11611	10031	9546.54	12499.4	11541.9	13869.4	17304.8	17157	21629.6
O95562	SFT2D2	Homo sapiens	Vesicle transport protein SFT2B	3217	2944.07	3263.63	7993.86	6698.82	3524.26	10301.8	11415.8	9835.26
O95571	ETHE1	Homo sapiens	Persulfide dioxygenase ETHE1, mitochondrial	7291.29	6495.14	5840.27	8457.01	7751.79	9345.04	11066.3	13891.9	16658.4
O95786	DDX58	Homo sapiens	Antiviral innate immune response receptor RIG-I	2522.1	NaN	1814.78	NaN	NaN	NaN	7088.52	11582.8	12883.1
O95817	BAG3	Homo sapiens	BAG family molecular chaperone regulator 3	NaN	743.114	977.662	1748.38	NaN	1601.29	2923.24	1282.02	626.56
O95819	MAP4K4	Homo sapiens	Mitogen-activated protein kinase kinase kinase kinase 4	292.977	942.492	962.856	1074.93	1915.64	1821.22	1.32106	295.781	1581.32
O95834	EML2	Homo sapiens	Echinoderm microtubule-associated protein-like 2	37510.2	26768	29346.8	34019	16079.6	22007.5	38640.9	31574.4	33103.3
O96019	ACTL6A	Homo sapiens	Actin-like protein 6A	10364.3	11298.6	9910.48	10613.2	5143.66	8603.91	9218.62	8103.78	9226.66
P00338	LDHA	Homo sapiens	L-lactate dehydrogenase A chain	32499.6	34225.4	33234.9	40045.1	39412.9	41112.2	25555.2	26487.9	23375.4
P00352	ALDH1A1	Homo sapiens	Aldehyde dehydrogenase 1A1	1112.5	3007.52	1698.33	242.458	2068.26	1787.37	2716.62	2272.17	17.6638
P00367	GLUD1	Homo sapiens	Glutamate dehydrogenase 1, mitochondrial	5376.35	5328.44	3284.48	3522.34	4816.67	6896.14	14870.1	15563.3	18085.5
P00387	CYB5R3	Homo sapiens	NADH-cytochrome b5 reductase 3	1350.08	1130.68	700.998	2122.69	663.691	262.946	5575.29	2859.28	6121.62
P00450	CP	Homo sapiens	Ceruloplasmin	7038	5595.23	5649.88	6883.63	4549.9	6604.08	9136.9	7248.76	6912.35
P00488	F13A1	Homo sapiens	Coagulation factor XIII A chain	53760.1	54763	55359.4	112516	59985.1	55279.7	57041.1	54147.5	78363.5
P00558	PGK1	Homo sapiens	Phosphoglycerate kinase 1	61465.4	66104	68555.4	61235.9	54591.6	56305.7	64341.3	65372.1	70142.7
P00734	F2	Homo sapiens	Prothrombin	47625.2	51413.8	49287.6	67755.5	57613.5	65498.3	80943.6	89289.1	82438.6
P00740	F9	Homo sapiens	Coagulation factor IX	65738.3	68053.2	62082.5	93883.3	80456.5	86065.2	83369	74960.1	74234.6
P00742	F10	Homo sapiens	Coagulation factor X	11724.6	10659.1	12733.3	11510.3	12263.1	11513.7	9566.49	8517.74	7203.18
P00747	PLG	Homo sapiens	Plasminogen	20625.1	23804.5	22881.8	33481.4	36527	35908.8	29658.2	28355.7	31948
P00749	PLAU	Homo sapiens	Urokinase-type plasminogen activator	1105.82	179.542	NaN	5985.83	7728.1	7380.51	533.193	NaN	1.15654
P00751	CFB	Homo sapiens	Complement factor B	5146.61	5540.52	3925.21	5659.26	5902.75	5489.55	4949.45	7946.11	8433.61
P00918	CA2	Homo sapiens	Carbonic anhydrase 2	10697.3	12364.4	12072.7	31013.5	25775.2	31139.8	20305	16026.8	20241.5
P00966	ASS1	Homo sapiens	Argininosuccinate synthase	28173.2	28180.9	27345.6	28548.6	31318.4	26906	14992.3	14012	13765.2
P00973	OAS1	Homo sapiens	2'-5'-oligoadenylate synthase 1	NaN	NaN	NaN	NaN	NaN	NaN	1.01092	0.951416	1
P01008	SERPINC1	Homo sapiens	Antithrombin-III	1.1077e+06	871650	902938	1.60034e+06	1.24071e+06	1.38141e+06	1.35789e+06	1452589	1.53143e+06
P01023	A2M	Homo sapiens	Alpha-2-macroglobulin	7798035	7.5662e+06	7996710	11373948	8730507	9889235	11290143	10311366	11054441
P01024	C3	Homo sapiens	Complement C3	262379	274953	279718	379541	296364	362265	348437	327743	330413
P01031	C5	Homo sapiens	Complement C5	102970	110416	115833	150631	142765	152324	65509.6	45848.9	65821.5
P01033	TIMP1	Homo sapiens	Metalloproteinase inhibitor 1	16393.4	17313.7	15847.9	30731.3	20403.5	26330.4	1080.28	2480.47	1390.21
P01042	KNG1	Homo sapiens	Kininogen-1	NaN	NaN	3240.7	NaN	NaN	NaN	NaN	492.615	NaN
P01111	NRAS	Homo sapiens	GTPase NRas	3869.31	3470.08	2246.16	0.566236	2403.68	2938.29	3754.65	2360.13	8.28045
P01130	LDLR	Homo sapiens	Low-density lipoprotein receptor	2026.15	868.809	2288.12	1017.79	1529.27	735.414	NaN	937.313	1003.25
P01266	TG	Homo sapiens	Thyroglobulin	1251.63	1652.46	1944.02	5949.74	5207.62	5331.84	NaN	NaN	NaN
P01344	IGF2	Homo sapiens	Insulin-like growth factor II	5253.79	7074.92	5218.57	9232.51	6834.7	9480.47	10561.1	9985.87	7812.06
P01584	IL1B	Homo sapiens	Interleukin-1 beta	3110.19	4899.87	5076.84	6249.6	5729.1	7933.27	1767.88	2658.42	2912.7
P01889	HLA-B	Homo sapiens	HLA class I histocompatibility antigen, B alpha chain	9066.4	11347.2	9748.6	9279.49	9445	9073.87	35147.9	40716.3	36850.2
P01893	HLA-H	Homo sapiens	Putative HLA class I histocompatibility antigen, alpha chain H	9184.4	10009	8044.94	7039.27	9399.67	7872.07	19867.8	22017	17247.4
P01911;Q30154	HLA-DRB1;HLA-DRB5	Homo sapiens	HLA class II histocompatibility antigen, DRB1 beta chain;HLA class II histocompatibility antigen, DR beta 5 chain	12976.1	14757.3	10243.4	8617.57	8210.84	12840.7	3546.44	2957.18	2349.08
P02042;P68871	HBD;HBB	Homo sapiens	Hemoglobin subunit delta;Hemoglobin subunit beta	129913	105095	94117.4	189839	92876.5	139714	31394.6	57535.5	82443.9
P02452	COL1A1	Homo sapiens	Collagen alpha-1(I) chain	29932.5	28493.4	31264.8	37120.2	40632.7	40300.2	50380.8	42753.2	62964.2
P02458	COL2A1	Homo sapiens	Collagen alpha-1(II) chain	18377.9	26382.7	24723.6	28096.9	29821.5	36077.5	34169	40858.7	47418.6
P02461	COL3A1	Homo sapiens	Collagen alpha-1(III) chain	15155.2	18850.1	18155.5	22366.9	21965.4	21266.8	23103.8	20970.5	26202.8
P02533	KRT14	Homo sapiens	Keratin, type I cytoskeletal 14	1.00876e+06	87904.4	67670.7	242310	97478.1	86197.8	322506	221226	101336
P02538	KRT6A	Homo sapiens	Keratin, type II cytoskeletal 6A	1.08379e+06	112576	75569.9	333659	98342.2	101677	329515	259890	208852
P02545	LMNA	Homo sapiens	Prelamin-A/C	16867.2	15162.7	16767.9	21375.7	19827.3	21064	27045.3	30272.5	28733.5
P02647	APOA1	Homo sapiens	Apolipoprotein A-I	7799.26	5431.76	5918.25	6782.22	2704.61	5239.68	4612.36	3847.98	3040.1
P02649	APOE	Homo sapiens	Apolipoprotein E	31260.8	36042.2	36336.4	11277	11498.8	10944.7	14896.9	17085.2	15031.2
P02655	APOC2	Homo sapiens	Apolipoprotein C-II	8114.39	3834.92	3068.7	NaN	NaN	NaN	3393.04	2555.85	311.182
P02656	APOC3	Homo sapiens	Apolipoprotein C-III	7231.3	6785.15	8139.26	3719.32	4917.86	5346.21	5136.27	9925.24	5836.13
P02675	FGB	Homo sapiens	Fibrinogen beta chain	13684.5	18001.3	15935	21284.4	19378.4	22680.4	19653.1	12345.2	14293.9
P02679	FGG	Homo sapiens	Fibrinogen gamma chain	58994	62487.7	56993.9	72424.3	60654.5	70926.6	96082.2	87042	95749.5
P02748	C9	Homo sapiens	Complement component C9	114086	129481	131507	194751	166339	167917	119928	98368.3	116484
P02751	FN1	Homo sapiens	Fibronectin	91135.2	91317.6	91645.9	330366	328971	333067	82103.5	81485.1	87027.1
P02753	RBP4	Homo sapiens	Retinol-binding protein 4	746297	671768	626644	1.02001e+06	913982	1.19858e+06	508153	212286	357810
P02760	AMBP	Homo sapiens	Protein AMBP	9021.47	2993.97	1360.12	2661.33	865.503	2085.39	NaN	NaN	2874.06
P02765	AHSG	Homo sapiens	Alpha-2-HS-glycoprotein	2.37872e+06	2424694	2104248	2.87364e+06	3612539	2.97918e+06	2.9638e+06	2.89647e+06	3.11449e+06
P02768	ALB	Homo sapiens	Albumin	24586916	23036294	22326642	33107936	28201510	30933320	28562486	20683360	23027560
P02771	AFP	Homo sapiens	Alpha-fetoprotein	272360	255152	290280	537690	519116	498447	241689	258069	259352
P02774	GC	Homo sapiens	Vitamin D-binding protein	424138	440485	416788	658213	553028	615320	681246	670415	649857
P02775	PPBP	Homo sapiens	Platelet basic protein	180.711	NaN	NaN	2464.72	NaN	1393.21	5431.61	5523.74	5614.2
P02786	TFRC	Homo sapiens	Transferrin receptor protein 1	11906	14250.6	12876	9124.82	8290.84	9675.72	6431.19	6156.52	5439.75
P02787	TF	Homo sapiens	Serotransferrin	6447.86	6939.49	7313.83	6465.55	4731.39	6528.42	4244.63	5741.71	5473.68
P02788	LTF	Homo sapiens	Lactotransferrin	477897	371117	334816	682089	547213	719002	554415	507351	492673
P02790	HPX	Homo sapiens	Hemopexin	20072.6	15973	14306.3	26360.9	23372	21983.2	17863.3	16361.3	19192.1
P02794	FTH1	Homo sapiens	Ferritin heavy chain	6428.34	6672.81	6646.2	6800.01	8862.88	8694.26	10066	8373.36	13211.2
P02795;P04732;P13640;P80297;Q8N339	MT2A;MT1E;MT1G;MT1X;MT1M	Homo sapiens	Metallothionein-2;Metallothionein-1E;Metallothionein-1G;Metallothionein-1X;Metallothionein-1M	23366.3	30570.9	31061.9	47862.6	31449.7	30001.4	29522.2	32392.7	30932.5
P03956	MMP1	Homo sapiens	Interstitial collagenase	25977.4	28382	30109.3	131786	92713.9	113245	14550.9	13087.8	15420.5
P04004	VTN	Homo sapiens	Vitronectin	100197	118886	106199	171267	159149	143187	137142	119234	150007
P04040	CAT	Homo sapiens	Catalase	8952.03	8669.71	8644.23	7396.01	8855.31	9523.49	5953.85	7436.5	7754.79
P04075	ALDOA	Homo sapiens	Fructose-bisphosphate aldolase A	94160.1	89626.3	89711.5	95541.7	90953.1	98355.7	72429.8	77785.9	74297.4
P04080	CSTB	Homo sapiens	Cystatin-B	695.541	2600.48	2260.3	1647.21	2246.05	1035.9	1779.39	4966.86	2848.94
P04083	ANXA1	Homo sapiens	Annexin A1	290149	313712	321031	88351.5	91711.1	88573.7	53141.6	51383.6	56884.8
P04114	APOB	Homo sapiens	Apolipoprotein B-100	38703.5	38551.5	35506.1	52051.4	38922.2	43948.2	59852.3	43017.4	40782.2
P04180	LCAT	Homo sapiens	Phosphatidylcholine-sterol acyltransferase	1441.53	1376.11	1594.25	2785.54	1849.07	3505.71	1359.68	597.384	1086.86
P04196	HRG	Homo sapiens	Histidine-rich glycoprotein	5369.73	8393.27	6653.88	28596.4	15295.5	14835.1	2362.64	1797.04	8326.83
P04259	KRT6B	Homo sapiens	Keratin, type II cytoskeletal 6B	4296153	280375	167924	808784	194679	154906	729939	334929	254678
P04264	KRT1	Homo sapiens	Keratin, type II cytoskeletal 1	2.41972e+06	472135	434245	478019	631775	627447	1.41984e+06	1363991	563018
P04275	VWF	Homo sapiens	von Willebrand factor	1710.87	4311.54	5860.5	3675.26	1359.5	2526.38	4061.96	1088.17	3304.68
P04278	SHBG	Homo sapiens	Sex hormone-binding globulin	21849	21212	23736.6	32388.3	22158.7	26534.5	29735.3	26266.5	33044.2
P04406	GAPDH	Homo sapiens	Glyceraldehyde-3-phosphate dehydrogenase	230922	228855	209738	144557	148849	132363	158669	156663	172869
P04439	HLA-A	Homo sapiens	HLA class I histocompatibility antigen, A alpha chain	40124.4	41303.5	46949.9	53871.1	39088.5	33960.9	69730.7	71837.6	77211.9
P04632	CAPNS1	Homo sapiens	Calpain small subunit 1	507.381	4223.56	2964.73	NaN	2890.03	3163.65	1102.66	2914.43	5607.08
P04746;P0DTE7;P0DTE8;P0DUB6;P19961	AMY2A;AMY1B;AMY1C;AMY1A;AMY2B	Homo sapiens	Pancreatic alpha-amylase;Alpha-amylase 1B;Alpha-amylase 1C;Alpha-amylase 1A;Alpha-amylase 2B	8433.15	11141.2	8012.81	9966.4	8422.32	10768.6	7770.3	9234.31	10169.9
P04792	HSPB1	Homo sapiens	Heat shock protein beta-1	32589	33081.3	42151.6	26135.2	30094.2	19740.3	17476.4	20605.8	14722.7
P04843	RPN1	Homo sapiens	Dolichyl-diphosphooligosaccharide--protein glycosyltransferase subunit 1	1915.58	3075.11	1886.06	2940.39	1504.93	2955.99	8591.98	12737.3	15642.8
P04899	GNAI2	Homo sapiens	Guanine nucleotide-binding protein G(i) subunit alpha-2	4637.37	5449.53	6680.85	5140.33	6788.87	5340.63	5387.84	9143.88	8207.56
P04908;P0C0S8;P20671;Q16777;Q6FI13;Q7L7L0;Q93077;Q96KK5;Q99878;Q9BTM1	H2AC4;H2AC11;H2AC7;H2AC20;H2AC18;H2AW;H2AC6;H2AC12;H2AC14;H2AJ	Homo sapiens	Histone H2A type 1-B/E;Histone H2A type 1;Histone H2A type 1-D;Histone H2A type 2-C;Histone H2A type 2-A;Histone H2A type 3;Histone H2A type 1-C;Histone H2A type 1-H;Histone H2A type 1-J;Histone H2A.J	23230.4	12334.9	11430	19577.3	12677.9	12700.5	21088.2	15841	20220.4
P05019	IGF1	Homo sapiens	Insulin-like growth factor I	5790.37	6775.71	6390.39	6998.51	9726.54	9535.85	10193.2	12145.4	9370.19
P05023	ATP1A1	Homo sapiens	Sodium/potassium-transporting ATPase subunit alpha-1	51690.4	50850.1	48662.8	37897.8	43008.7	40970.6	54589.1	58453.9	55806.4
P05062	ALDOB	Homo sapiens	Fructose-bisphosphate aldolase B	4136.84	5866.59	4646.65	2160.11	2609.02	3809.35	4.67004	1195.65	576.472
P05067	APP	Homo sapiens	Amyloid-beta precursor protein	NaN	1073.89	NaN	1010.01	1390.46	2116.45	NaN	496.999	NaN
P05089	ARG1	Homo sapiens	Arginase-1	7954.76	4159.12	4103.18	4784.68	4530.3	5232.64	13726.7	8313.61	10736.8
P05106	ITGB3	Homo sapiens	Integrin beta-3	7364.36	6518.23	5450.02	10569.5	11699.7	10977.3	3061.05	3747.62	3370.73
P05107	ITGB2	Homo sapiens	Integrin beta-2	29755.4	34878.7	31762.1	33955.1	33158.7	31542.3	12656.8	18730.7	17786.2
P05156	CFI	Homo sapiens	Complement factor I	80035.1	83093.4	73697.1	109537	106464	99039.2	167461	153814	151812
P05198	EIF2S1	Homo sapiens	Eukaryotic translation initiation factor 2 subunit 1	10623.3	8989.9	8382.25	4855.78	4627.51	3457.8	6815.91	7613.66	5992.58
P05204	HMGN2	Homo sapiens	Non-histone chromosomal protein HMG-17	16249.6	13820.4	7822.44	28710.5	11760.3	17030.4	7213.36	10841.7	9078.51
P05362	ICAM1	Homo sapiens	Intercellular adhesion molecule 1	5225.12	6049.26	5192.73	10906.6	11137.5	11382.7	11623.6	15391.2	17045.9
P05387	RPLP2	Homo sapiens	60S acidic ribosomal protein P2	51939.4	50789.1	54711.8	39293.9	36610.8	37432.4	26556	25015.8	28662.9
P05388;Q8NHW5	RPLP0;RPLP0P6	Homo sapiens	60S acidic ribosomal protein P0;60S acidic ribosomal protein P0-like	53617.6	61881	62992.8	47048.1	37020.2	36330.6	39410.1	33103.7	35681.6
P05452	CLEC3B	Homo sapiens	Tetranectin	9088.08	9357.44	8406.15	13742.8	11139.5	11741.3	13771.2	12713	12848.2
P05455	SSB	Homo sapiens	Lupus La protein	3554.74	3877.84	11436.7	1961.27	1096.6	978.15	4470.07	5665.42	5082.97
P05543	SERPINA7	Homo sapiens	Thyroxine-binding globulin	41881.7	39525.7	34126.6	121769	51180	64033.5	21035.5	28576.2	52751.2
P05546	SERPIND1	Homo sapiens	Heparin cofactor 2	29819.6	47020.1	46753.2	51787.1	50743.1	49426	60375.4	33204.3	62787.4
P05556	ITGB1	Homo sapiens	Integrin beta-1	28270	29504.1	26180.5	43982.3	45296.9	45712.6	31728.8	32484.9	36240.5
P06132	UROD	Homo sapiens	Uroporphyrinogen decarboxylase	7650.9	11048.5	8816	8394.04	6542.35	6927.59	6695.04	8542.94	8145.09
P06280	GLA	Homo sapiens	Alpha-galactosidase A	14952	9926.68	11740.8	23332.7	20099.6	25951.1	45.4421	5032.67	3292.21
P06396	GSN	Homo sapiens	Gelsolin	311608	298244	331784	360444	351329	348073	408195	405114	383378
P06576	ATP5F1B	Homo sapiens	ATP synthase subunit beta, mitochondrial	31624	32308.8	30237.5	27110.9	26715.2	25934.9	57984.8	54330.9	63916.1
P06730	EIF4E	Homo sapiens	Eukaryotic translation initiation factor 4E	14325.6	13614.2	11247.9	10847.1	5956.57	5060.58	6126.71	3513.17	3433.48
P06733	ENO1	Homo sapiens	Alpha-enolase	40021	40582.4	42587.6	38951.3	39006.5	38643.7	48068.8	58368.5	46088.1
P06737	PYGL	Homo sapiens	Glycogen phosphorylase, liver form	99845.2	103362	98880.9	91606.3	90733.8	86041.9	86323.8	86623.6	89932.7
P06744	GPI	Homo sapiens	Glucose-6-phosphate isomerase	9831.67	6263.03	5169.15	7556.71	4856.68	5698.87	4266	4758.7	7137.01
P06748	NPM1	Homo sapiens	Nucleophosmin	27245.9	31185.5	33869.3	16379.7	20743.8	23080.6	26105.3	24364.8	29761.8
P06753	TPM3	Homo sapiens	Tropomyosin alpha-3 chain	1266.51	841.167	378.438	1292.98	2.30394	4.09732	2.6083	1081.96	1.22923
P06756	ITGAV	Homo sapiens	Integrin alpha-V	7721.51	9791.17	8144.22	15778.4	11394.6	14632.1	4399.07	3638.41	2250.69
P06858	LPL	Homo sapiens	Lipoprotein lipase	9886.55	9326.26	10504.5	27260.2	23674.3	22078.3	8308.31	10068.6	16364
P06899;P23527;P33778;Q16778;Q8N257	H2BC11;H2BC17;H2BC3;H2BC21;H2BU1	Homo sapiens	Histone H2B type 1-J;Histone H2B type 1-O;Histone H2B type 1-B;Histone H2B type 2-E;Histone H2B type 3-B	22108.5	24496.5	23365.1	31815.3	20385	26206.6	37312.8	30739.3	35712.7
P07195	LDHB	Homo sapiens	L-lactate dehydrogenase B chain	44291.4	44765.9	44646.6	47755.5	44338.4	49185.8	57928.8	55178.5	56163.3
P07203	GPX1	Homo sapiens	Glutathione peroxidase 1	5339.19	6376.09	5414.58	4086.6	4094.39	4900.29	6093.35	5511.42	4755.33
P07204	THBD	Homo sapiens	Thrombomodulin	17417.4	21052	16728	56548.1	70266.1	63787.5	28900.4	43490.9	39290
P07237	P4HB	Homo sapiens	Protein disulfide-isomerase	9058.41	9193.32	8755.54	11136.8	8498.66	8152	12295.6	15558.9	17472.4
P07333	CSF1R	Homo sapiens	Macrophage colony-stimulating factor 1 receptor	2175.03	2579.7	2495.39	3715.79	5229.19	5807.36	5741.54	8078.31	7883.58
P07339	CTSD	Homo sapiens	Cathepsin D	7212.28	5652.13	4560.07	5503.71	3898.6	4854.27	5673.51	4396.76	3556.25
P07355	ANXA2	Homo sapiens	Annexin A2	168722	169292	170332	74005.6	80312.3	69840.2	39177	40893.8	35609.4
P07358	C8B	Homo sapiens	Complement component C8 beta chain	133492	133856	120060	145649	134777	138706	211655	212773	208077
P07437	TUBB	Homo sapiens	Tubulin beta chain	137877	113218	112517	207432	115939	121323	68635.4	69486.7	102579
P07477	PRSS1	Homo sapiens	Serine protease 1	49628.6	38602.1	41335.6	83308.1	50972.4	45563.2	50294.7	47804	63019.1
P07602	PSAP	Homo sapiens	Prosaposin	2655.93	1580.91	948.759	3226.01	2223.46	2209.4	1297.63	4.80784	530.645
P07686	HEXB	Homo sapiens	Beta-hexosaminidase subunit beta	4170.35	3562.75	2833.94	2261.35	3495.68	2925.23	7282.02	5793.97	3683.92
P07711	CTSL	Homo sapiens	Procathepsin L	4142.85	5822.83	4805.33	18303.8	17956.9	12727	6602.15	4663.24	8463.49
P07737	PFN1	Homo sapiens	Profilin-1	36613.9	40367.6	39338.7	48074.9	48135.1	46762.9	60925.1	53336.9	55417.9
P07738	BPGM	Homo sapiens	Bisphosphoglycerate mutase	5660.67	5638.69	5987.35	6513.54	7814.97	5416.81	9647.97	7102.91	7643.84
P07741	APRT	Homo sapiens	Adenine phosphoribosyltransferase	34170.5	35774.4	24921.3	19892.6	19830.4	19940.3	34718.9	31099.2	28168.2
P07814	EPRS1	Homo sapiens	Bifunctional glutamate/proline--tRNA ligase	23667.6	25455.8	25255.8	18976.6	17373.8	19332.1	25484.3	28584.5	30459.2
P07858	CTSB	Homo sapiens	Cathepsin B	9151.74	9891.07	9363.21	23809.4	23177.6	26326.7	5228.31	6172	5549.19
P07900	HSP90AA1	Homo sapiens	Heat shock protein HSP 90-alpha	173741	174853	182077	165815	146921	142286	167353	170074	190683
P07902	GALT	Homo sapiens	Galactose-1-phosphate uridylyltransferase	14886.4	14372.4	13858.8	12978.5	11534.9	13410.7	17930.2	20543.2	22292
P07910	HNRNPC	Homo sapiens	Heterogeneous nuclear ribonucleoproteins C1/C2	5920.31	5351.6	5669.9	5949.35	8137.15	9146.74	9525.51	11492.4	6791.72
P07948	LYN	Homo sapiens	Tyrosine-protein kinase Lyn	3716.87	4045.36	3711.04	5612.57	3646.91	3750.55	19262.1	15778.4	15558.9
P07954	FH	Homo sapiens	Fumarate hydratase, mitochondrial	3168.67	3651.17	4528.85	7452.24	3651.7	3037.74	5927.49	4067.81	8674.52
P07996	THBS1	Homo sapiens	Thrombospondin-1	32128.4	34004.3	32998.2	42233.4	41158.9	41698.8	40635.7	41338	39966.4
P08123	COL1A2	Homo sapiens	Collagen alpha-2(I) chain	14523.9	13721.7	13874.2	19825.8	20278.2	18717.6	23460.4	23335.5	25063
P08133	ANXA6	Homo sapiens	Annexin A6	65346	73037.6	69281.1	49407.1	58418.5	54312.8	50856	53180.4	56334.3
P08134	RHOC	Homo sapiens	Rho-related GTP-binding protein RhoC	1238.21	1728.12	1209.08	1.14514	2399.87	1175.55	1.25474	4530.2	331.288
P08195	SLC3A2	Homo sapiens	4F2 cell-surface antigen heavy chain	59282.9	53324.7	54326.2	93640.8	70695	84647.5	69770	91151	82121
P08238	HSP90AB1	Homo sapiens	Heat shock protein HSP 90-beta	315501	318632	331512	321499	342664	340251	406940	404382	391543
P08240	SRPRA	Homo sapiens	Signal recognition particle receptor subunit alpha	6395.79	5095.56	6019.69	3239.43	5292.06	4575.27	5694.96	3120.69	4658.32
P08243	ASNS	Homo sapiens	Asparagine synthetase [glutamine-hydrolyzing]	943.254	1696.71	2684.51	1644.51	2840.92	1491.48	2504.44	735.087	166.136
P08254	MMP3	Homo sapiens	Stromelysin-1	NaN	NaN	836.543	841.279	3570.01	2216.33	1.31662	1075.47	457.408
P08263;P09210	GSTA1;GSTA2	Homo sapiens	Glutathione S-transferase A1;Glutathione S-transferase A2	4926.82	3050.08	2244.73	1947.86	1100.2	1952.44	2373.57	2100.55	2562.31
P08311	CTSG	Homo sapiens	Cathepsin G	11445.1	11703.5	12407.3	4036.98	3338.09	2788.88	3572.69	2692.51	1944.93
P08476	INHBA	Homo sapiens	Inhibin beta A chain	NaN	NaN	NaN	6186.93	6325.93	6494.82	NaN	NaN	NaN
P08519	LPA	Homo sapiens	Apolipoprotein(a)	11415	14592	17009.1	27560	37981.4	30421.9	27171.5	22130.7	31124.4
P08567	PLEK	Homo sapiens	Pleckstrin	641.928	NaN	893.684	NaN	541.421	441.609	NaN	NaN	NaN
P08575	PTPRC	Homo sapiens	Receptor-type tyrosine-protein phosphatase C	241.436	1113.79	1668.25	1551.48	2199.41	1547.44	6431.27	5033.47	4938.93
P08621	SNRNP70	Homo sapiens	U1 small nuclear ribonucleoprotein 70 kDa	695.68	916.099	743.532	NaN	NaN	NaN	2931.42	2687.73	4046.81
P08648	ITGA5	Homo sapiens	Integrin alpha-5	60701.9	59048	49775.3	98800.1	91122	96057.4	60325.2	61656.3	61768.5
P08670	VIM	Homo sapiens	Vimentin	208018	216425	210407	334771	328935	335342	272235	230460	216772
P08697	SERPINF2	Homo sapiens	Alpha-2-antiplasmin	11960.7	10088.9	10502.5	21395	11229	11878.6	15837.6	13378.9	21819.3
P08754	GNAI3	Homo sapiens	Guanine nucleotide-binding protein G(i) subunit alpha-3	3330.62	5026.28	5897.11	3507.64	4789.84	6217.78	7131.72	6285.51	5532.99
P08758	ANXA5	Homo sapiens	Annexin A5	73707.2	73681.3	76213.8	56211.8	56251.5	58279.8	52744.5	45228.7	46498.1
P08779	KRT16	Homo sapiens	Keratin, type I cytoskeletal 16	235334	7758.54	5078.22	57023	7852.65	7353.47	52700.3	42822.9	25263.1
P08865	RPSA	Homo sapiens	40S ribosomal protein SA	45411.8	45526.2	49683.6	42161.1	38173.7	39725.7	36427.7	34144.4	29267.7
P08962	CD63	Homo sapiens	CD63 antigen	1577.27	1463.97	3848.79	NaN	2985.19	1161.4	2531.46	4959.6	2104.78
P09211	GSTP1	Homo sapiens	Glutathione S-transferase P	27722	31333.3	28063.3	24385.3	22767.6	15227.8	17172.4	23456.9	3830.07
P09341	CXCL1	Homo sapiens	Growth-regulated alpha protein	NaN	NaN	NaN	2177.47	3001.19	2585.17	NaN	NaN	NaN
P09382	LGALS1	Homo sapiens	Galectin-1	160543	170404	156107	202448	216625	204444	122272	133986	152048
P09417	QDPR	Homo sapiens	Dihydropteridine reductase	4265.91	4385.64	5073.66	3224.92	2576.8	3515.95	6340.06	6645.63	5480.76
P09467	FBP1	Homo sapiens	Fructose-1,6-bisphosphatase 1	11160.7	13284.2	11578.7	11815.8	9984.81	12179.4	18536.8	18666.7	12537
P09486	SPARC	Homo sapiens	SPARC	4479.67	3182.74	2136.38	730.563	5573.04	3513.91	17.0665	824.133	394.286
P09496	CLTA	Homo sapiens	Clathrin light chain A	38380.3	34931.9	34980.2	22119.9	19631.4	16332.9	6565.08	5644.27	4960.38
P09543	CNP	Homo sapiens	2',3'-cyclic-nucleotide 3'-phosphodiesterase	3253.24	3019.46	2839.38	1926.16	2117.56	964.102	9422.18	10079.3	8931.31
P09651	HNRNPA1	Homo sapiens	Heterogeneous nuclear ribonucleoprotein A1	2853.78	3424.38	3591.45	3711.62	4219.82	3873.97	3416.67	3265.98	2429.3
P09668	CTSH	Homo sapiens	Pro-cathepsin H	14671.7	11637.7	12904	11804.3	16992.6	10834.6	10519.2	9695.23	10630.6
P09874	PARP1	Homo sapiens	Poly [ADP-ribose] polymerase 1	NaN	638.016	347.566	767.451	1844.67	1661.32	1923.02	562.091	2006.56
P09913	IFIT2	Homo sapiens	Interferon-induced protein with tetratricopeptide repeats 2	3583.09	7330.81	7513.39	2154.36	7111.18	6511.08	197.577	2685.14	2336.85
P09914	IFIT1	Homo sapiens	Interferon-induced protein with tetratricopeptide repeats 1	1681.73	348.274	799.065	147.306	NaN	2.18534	17687	17457.9	13469.7
P09936	UCHL1	Homo sapiens	Ubiquitin carboxyl-terminal hydrolase isozyme L1	864.471	NaN	1470.57	2127.23	1956.12	NaN	3512.31	NaN	NaN
P09972	ALDOC	Homo sapiens	Fructose-bisphosphate aldolase C	23795.3	23785.4	22940	27127	16947.2	21603.8	14668.4	12376.2	19735
P0C0L4	C4A	Homo sapiens	Complement C4-A	57575.5	91665.8	84726.1	103319	84381.8	97110.7	77861	83885.2	89950.1
P0CB38	PABPC4L	Homo sapiens	Polyadenylate-binding protein 4-like	4432.12	4313.71	3635.18	4125	2622.04	2497.58	4313.72	1626.12	2369.71
P0CG47;P0CG48;P62979;P62987	UBB;UBC;RPS27A;UBA52	Homo sapiens	Polyubiquitin-B;Polyubiquitin-C;Ubiquitin-40S ribosomal protein S27a;Ubiquitin-60S ribosomal protein L40	73778.9	106041	120769	137994	113814	111870	143766	119839	130808
P0DMM9;P0DMN0;P50225	SULT1A3;SULT1A4;SULT1A1	Homo sapiens	Sulfotransferase 1A3;Sulfotransferase 1A4;Sulfotransferase 1A1	1948.87	750.32	604.638	1.69624	598.863	220.603	148.003	961.345	3.78451
P0DMV8;P0DMV9	HSPA1A;HSPA1B	Homo sapiens	Heat shock 70 kDa protein 1A;Heat shock 70 kDa protein 1B	42190.4	45130.9	37514.1	37272.3	27982.8	33140.4	41666.1	48720.3	58908.3
P0DOY2;P0DOY3	IGLC2;IGLC3	Homo sapiens	Immunoglobulin lambda constant 2;Immunoglobulin lambda constant 3	2146.53	NaN	5991.13	2110.65	2799.66	2294.72	2399.22	1608.82	NaN
P0DP23;P0DP24;P0DP25	CALM1;CALM2;CALM3	Homo sapiens	Calmodulin-1;Calmodulin-2;Calmodulin-3	27825.9	35883.7	24104.7	29667.2	23931.1	23077.3	18999.2	26367.1	31786.8
P0DPA2	VSIG8	Homo sapiens	V-set and immunoglobulin domain-containing protein 8	2.16167	3.11038	449.406	6.693	307.334	6.11131	10.4868	520.091	2246.51
P10145	CXCL8	Homo sapiens	Interleukin-8	10609.8	11566.8	11824.2	81603.7	94090.1	102227	9432.3	9689.61	12019.8
P10147	CCL3	Homo sapiens	C-C motif chemokine 3	7728.89	8919.77	8122.43	142480	138127	94431.4	7203.17	6893.59	2971.76
P10155	RO60	Homo sapiens	RNA-binding protein RO60	7987.51	8974.28	8424.65	7687.73	4450.99	4304.92	6588.75	6301.84	7180.83
P10253	GAA	Homo sapiens	Lysosomal alpha-glucosidase	2057.2	920.393	2464.87	2225.4	3519.43	1754.19	1878.66	2051.45	2207.47
P10301	RRAS	Homo sapiens	Ras-related protein R-Ras	1123.04	1962.45	1589.43	2542.46	798.562	2729.8	2971.42	3046.53	2728.7
P10321	HLA-C	Homo sapiens	HLA class I histocompatibility antigen, C alpha chain	10939.2	10133.2	13099.6	11863.8	16560	12602.7	22792.2	23605.3	18924.1
P10412	H1-4	Homo sapiens	Histone H1.4	5407.69	4351.05	5441.91	5056.69	3496.93	3629.27	3778.41	2928.18	3456.85
P10451	SPP1	Homo sapiens	Osteopontin	793.839	207.434	306.251	633.149	1985.92	1593.54	2280.85	2623.51	1987.13
P10599	TXN	Homo sapiens	Thioredoxin	3830.82	2142.25	4388.42	788.871	2434.4	1424.76	1548.62	NaN	481.42
P10643	C7	Homo sapiens	Complement component C7	58355.5	49885.2	58115.4	90114.2	70643	76800.1	45115.9	36911	39347.6
P10644	PRKAR1A	Homo sapiens	cAMP-dependent protein kinase type I-alpha regulatory subunit	5782.1	6588.54	7013.49	8314.19	3743.53	4796.22	6594.38	7360.91	6447.41
P10809	HSPD1	Homo sapiens	60 kDa heat shock protein, mitochondrial	25734.6	32713.5	28035.7	40655.2	41450.4	32889.7	50486.5	46752.7	53111.4
P10909	CLU	Homo sapiens	Clusterin	9152.84	2932.53	3613.8	6099.62	7594.05	4926.03	2.17832	NaN	NaN
P11021	HSPA5	Homo sapiens	Endoplasmic reticulum chaperone BiP	43816.7	46092.5	46875.5	41613.3	38889.9	41987.3	42831	39752.7	41693.3
P11142	HSPA8	Homo sapiens	Heat shock cognate 71 kDa protein	504907	485386	506213	492238	578837	574972	708522	685373	731586
P11166	SLC2A1	Homo sapiens	Solute carrier family 2, facilitated glucose transporter member 1	27053.4	29042.2	28396.9	58776.3	63417.2	59497.3	29515.6	24282	27263.2
P11215	ITGAM	Homo sapiens	Integrin alpha-M	8080.65	8278.66	8688.58	9164.11	7649.5	8279.05	1329.65	2130.84	2287.27
P11216	PYGB	Homo sapiens	Glycogen phosphorylase, brain form	9427.64	13565.8	13709	12269	15002.3	14663.1	9472.78	5445.88	5513.53
P11233	RALA	Homo sapiens	Ras-related protein Ral-A	4957.94	3762.77	3437.21	5948.91	5579.17	5171.94	5922.82	7213.56	7858.54
P11279	LAMP1	Homo sapiens	Lysosome-associated membrane glycoprotein 1	21697.9	14810.2	13904.7	22581.3	16275.4	20655.5	27406.9	24803.2	25677.1
P11310	ACADM	Homo sapiens	Medium-chain specific acyl-CoA dehydrogenase, mitochondrial	NaN	NaN	NaN	NaN	NaN	NaN	4430.53	2435.1	2389.72
P11387	TOP1	Homo sapiens	DNA topoisomerase 1	13436.2	14527.9	16178.6	8684.19	8098.98	9326.09	12892.7	12137.4	11692.1
P11413	G6PD	Homo sapiens	Glucose-6-phosphate 1-dehydrogenase	38529.2	40612.6	40056	25618.3	27181.5	25274.7	30057.7	28981.8	28575
P11586	MTHFD1	Homo sapiens	C-1-tetrahydrofolate synthase, cytoplasmic	18783.8	18626.1	17654.8	12779.2	12154.5	13721.2	15586.9	15738.1	15239.4
P11717	IGF2R	Homo sapiens	Cation-independent mannose-6-phosphate receptor	17108.4	22934.4	21050.1	38732.8	34281.3	33866.6	28001.3	26792.9	25908.1
P11940	PABPC1	Homo sapiens	Polyadenylate-binding protein 1	4138.53	4472.25	6059.83	3217.51	3229.86	3506.97	4361.53	4057.28	4175.54
P12035	KRT3	Homo sapiens	Keratin, type II cytoskeletal 3	15982.8	1007.6	288.996	2724.63	2834.42	1506.01	10248.6	1886.03	3137.86
P12081	HARS1	Homo sapiens	Histidine--tRNA ligase, cytoplasmic	2456.29	2250.9	3827.03	1779.57	5206.9	3511.53	296.787	2815	2110.84
P12109	COL6A1	Homo sapiens	Collagen alpha-1(VI) chain	16031	17638.7	18891.1	21564.2	22529.9	23213.6	11648.1	12830.3	8326.2
P12110	COL6A2	Homo sapiens	Collagen alpha-2(VI) chain	6314.71	2605.25	4594.11	2255.11	3482.79	2987.24	2.45604	NaN	NaN
P12111	COL6A3	Homo sapiens	Collagen alpha-3(VI) chain	14811.5	13480.2	15004.1	6493.99	6511.07	7193.03	4849.85	3365.71	4843.32
P12259	F5	Homo sapiens	Coagulation factor V	242781	229560	239404	187646	181706	171149	229717	238103	219684
P12268	IMPDH2	Homo sapiens	Inosine-5'-monophosphate dehydrogenase 2	18558.5	16800.5	16750.7	14678.3	14313.6	11909.2	14529.5	14992.8	15936.8
P12814	ACTN1	Homo sapiens	Alpha-actinin-1	3925.26	3426.07	5146.65	5062.21	3697.64	3642.37	1417.32	2133.33	3200.3
P12931	SRC	Homo sapiens	Proto-oncogene tyrosine-protein kinase Src	36734.3	48505.5	4372.28	3214.78	12080.5	17432.2	34082.2	318.3	302.5
P12956	XRCC6	Homo sapiens	X-ray repair cross-complementing protein 6	35243.8	30971.7	33356.1	22118.4	21571.4	21836.7	22984.7	21475.8	20962.9
P13010	XRCC5	Homo sapiens	X-ray repair cross-complementing protein 5	19959.7	17606.9	17078.6	13194.6	15501.7	12328.8	12335.4	14791.5	15448.2
P13473	LAMP2	Homo sapiens	Lysosome-associated membrane glycoprotein 2	10905.5	9312.61	8606.99	13157	12319.3	13565.4	12147.6	12054.8	13057.3
P13489	RNH1	Homo sapiens	Ribonuclease inhibitor	7134.37	7665.9	7286.78	13903.3	15070.2	15883.5	7682.09	9167.28	8998.75
P13497	BMP1	Homo sapiens	Bone morphogenetic protein 1	8971.82	7155.02	8721.59	10252.7	9792.23	10618.2	10920.9	10280.9	10722.8
P13501	CCL5	Homo sapiens	C-C motif chemokine 5	6279.13	2789.75	2675.95	21379.7	22240.8	21331.4	NaN	NaN	411.537
P13591	NCAM1	Homo sapiens	Neural cell adhesion molecule 1	1061.52	1266.55	1876.66	2427.26	3447.53	3138.49	2750.99	3199.7	NaN
P13639	EEF2	Homo sapiens	Elongation factor 2	149246	156027	163620	150342	144751	136497	122736	127368	133452
P13645	KRT10	Homo sapiens	Keratin, type I cytoskeletal 10	2.66101e+06	589835	467847	689576	664767	941679	1.22091e+06	1.19882e+06	1.44549e+06
P13646	KRT13	Homo sapiens	Keratin, type I cytoskeletal 13	NaN	NaN	NaN	450.581	432.468	503.934	26146	NaN	NaN
P13647	KRT5	Homo sapiens	Keratin, type II cytoskeletal 5	199000	21627.1	18160.1	32373.4	29758.3	22035.8	64737.8	63361.3	28238.2
P13667	PDIA4	Homo sapiens	Protein disulfide-isomerase A4	6830.45	4026.89	6752.98	2749.26	3796.02	2895.37	2822.82	4472.04	2669.05
P13747	HLA-E	Homo sapiens	HLA class I histocompatibility antigen, alpha chain E	NaN	NaN	NaN	NaN	333.796	NaN	4787.11	4932.03	6029.23
P13796	LCP1	Homo sapiens	Plastin-2	28198.5	30157.1	21869.7	33342.6	35223.5	27884.3	13322.4	15773.7	16742.5
P13797	PLS3	Homo sapiens	Plastin-3	2453.68	3283.18	2178.92	3712.26	3731.91	4501.4	4122.98	3743.53	3549.59
P13798	APEH	Homo sapiens	Acylamino-acid-releasing enzyme	3436.4	3282.04	6217.57	2190.61	3390.91	1636.17	2906.99	3732.04	2740.38
P13804	ETFA	Homo sapiens	Electron transfer flavoprotein subunit alpha, mitochondrial	NaN	804.093	479.492	NaN	NaN	824.9	1124.97	2170.22	1482.65
P13807	GYS1	Homo sapiens	Glycogen [starch] synthase, muscle	8299.59	6691.44	6915.04	9705.62	10819.7	9314.41	5818.99	5746.71	6134.41
P13861	PRKAR2A	Homo sapiens	cAMP-dependent protein kinase type II-alpha regulatory subunit	13632.2	12446	17654.6	15128.1	14703.8	13772	12717.7	9993.49	10653.6
P13942	COL11A2	Homo sapiens	Collagen alpha-2(XI) chain	2928.56	4008.62	2759.2	5491.28	6796.56	4154.89	7443.12	6808.93	4073.37
P13987	CD59	Homo sapiens	CD59 glycoprotein	192.588	NaN	1347.29	2660.82	2074.77	1456.53	1722.58	1261.52	514.35
P14174	MIF	Homo sapiens	Macrophage migration inhibitory factor	3490.6	3016.09	2774.94	1094.79	3190.91	1123.05	2364.82	991.783	2859.75
P14209	CD99	Homo sapiens	CD99 antigen	1011.97	3624.22	1865.8	4833.47	2016.94	3772.61	2401.05	1031.96	2473.45
P14210	HGF	Homo sapiens	Hepatocyte growth factor	89556.1	113758	123635	144710	85774.2	117812	152355	158427	147097
P14384	CPM	Homo sapiens	Carboxypeptidase M	2250.05	1772.25	306.578	6264.28	3073.6	2964.51	2275.77	1712.72	919.751
P14543	NID1	Homo sapiens	Nidogen-1	3147.22	2438.95	2963.21	3935.17	4450.74	3095.28	5677	3072.77	4283.73
P14550	AKR1A1	Homo sapiens	Aldo-keto reductase family 1 member A1	9715.31	10054.8	10826.6	11197.1	10937.6	9649.14	17676.5	14921.6	16505
P14618	PKM	Homo sapiens	Pyruvate kinase PKM	758790	705232	805882	413129	407369	421053	544394	496712	497828
P14625	HSP90B1	Homo sapiens	Endoplasmin	40992.8	41207.8	42717.5	33371.6	33828.9	36161.2	54046.7	49146.6	49567.2
P14780	MMP9	Homo sapiens	Matrix metalloproteinase-9	44012.2	53095.3	43660.9	83674.7	68440.1	78150.9	41063	39808.4	53414.8
P14866	HNRNPL	Homo sapiens	Heterogeneous nuclear ribonucleoprotein L	9772.87	8652.66	10342.6	5488.32	5646.49	3988.17	6946.78	7487.39	6040.74
P14868	DARS1	Homo sapiens	Aspartate--tRNA ligase, cytoplasmic	28299.7	30895.4	30377.9	20396.3	20067.9	19608.6	28955.3	27286.9	25620.3
P14923	JUP	Homo sapiens	Junction plakoglobin	34140.4	8.46277	2455.87	10269.4	885.09	3081.9	81846.1	3937.51	NaN
P15090	FABP4	Homo sapiens	Fatty acid-binding protein, adipocyte	5047.19	5148.52	4871.7	8824	5967.15	8746.64	19449.9	22116.1	21704.8
P15104	GLUL	Homo sapiens	Glutamine synthetase	3074.54	7789.65	10153	2132.04	6833.69	9048.21	93.4606	3790.2	2843.43
P15121	AKR1B1	Homo sapiens	Aldo-keto reductase family 1 member B1	23304.7	22215	22962.8	11713.2	8490.33	9204.17	13844.6	15861.7	12384.5
P15144	ANPEP	Homo sapiens	Aminopeptidase N	74613.8	78254.2	81056.2	120318	115218	125857	78876	75174	76082.4
P15153	RAC2	Homo sapiens	Ras-related C3 botulinum toxin substrate 2	41436.4	43014.6	49517	49592.9	48794.1	45967.1	10622.4	18184	10207.2
P15169	CPN1	Homo sapiens	Carboxypeptidase N catalytic chain	51912.3	37747.1	47409.7	53208.7	44490.5	56153.3	70186.5	85072.6	35800.9
P15170	GSPT1	Homo sapiens	Eukaryotic peptide chain release factor GTP-binding subunit ERF3A	7627.18	7762.06	6951.36	7524.74	5508.45	6005.04	3882.91	1870.54	56.9456
P15260	IFNGR1	Homo sapiens	Interferon gamma receptor 1	8252.05	5602.61	8344.44	19823.1	127.248	3845.53	1816.47	2336.97	2920.36
P15311	EZR	Homo sapiens	Ezrin	4641.68	7356.01	4604.31	4442.97	3254.79	4175.24	27.4532	24.3158	1244.77
P15514	AREG	Homo sapiens	Amphiregulin	NaN	NaN	NaN	2127.04	328.059	2405.38	1.30349	1.08557	NaN
P15559	NQO1	Homo sapiens	NAD(P)H dehydrogenase [quinone] 1	9023.04	10668	11107	7279.97	8786.95	9231.37	9419.65	11405.8	10789.3
P15880	RPS2	Homo sapiens	40S ribosomal protein S2	7086.57	5650.53	8829.57	6481.4	6775.67	9165.67	9617.24	6685.56	6164.57
P15924	DSP	Homo sapiens	Desmoplakin	12206.5	1453.48	1061.18	2358.38	1195.86	1346.64	8621.42	3037.46	1005.76
P16035	TIMP2	Homo sapiens	Metalloproteinase inhibitor 2	580.877	4109.8	4091.3	3035.78	3657.36	1637.48	6190.32	4077.03	4993.74
P16070	CD44	Homo sapiens	CD44 antigen	6557.58	7047.94	6147.96	6648.29	9665.43	9617.6	3812.64	6005.9	6904.9
P16150	SPN	Homo sapiens	Leukosialin	5896.6	6228.72	6963.19	5341.15	6069.03	5273.2	NaN	NaN	NaN
P16152	CBR1	Homo sapiens	Carbonyl reductase [NADPH] 1	4073.64	3114.42	1508.57	4288.36	2369.45	1744.87	3363.06	3242	NaN
P16278	GLB1	Homo sapiens	Beta-galactosidase	562.152	2507.11	1869.22	1553.28	1608.91	1530.07	1.30606	1.22586	660.411
P16284	PECAM1	Homo sapiens	Platelet endothelial cell adhesion molecule	15319.3	17127.6	19160.3	18115.1	18397.4	20598.2	15975.1	19217.6	16844.9
P16619	CCL3L1	Homo sapiens	C-C motif chemokine 3-like 1	152.043	14.5687	NaN	854.585	1472.46	1727.07	NaN	NaN	NaN
P16671	CD36	Homo sapiens	Platelet glycoprotein 4	NaN	1647.6	NaN	6504.06	6072.21	5429.15	913.226	NaN	2084.08
P16885	PLCG2	Homo sapiens	1-phosphatidylinositol 4,5-bisphosphate phosphodiesterase gamma-2	19486.6	19306.3	20622.3	24951.5	22727.7	23715.7	25508	27076	25396.4
P16930	FAH	Homo sapiens	Fumarylacetoacetase	33747.1	33206	37416.4	33935.6	29353.3	34518.3	39742.3	33169.2	34253.5
P17031	ZNF26	Homo sapiens	Zinc finger protein 26	5165.15	3749.36	5644.4	3716.68	9790.62	1444.4	7678.33	2125.64	1.15215
P17096	HMGA1	Homo sapiens	High mobility group protein HMG-I/HMG-Y	193.518	2005.57	1577.05	4974.47	3890.62	3526.27	767.737	1437.24	3421.42
P17301	ITGA2	Homo sapiens	Integrin alpha-2	3450.28	2481.45	1746.65	4548.63	3348.65	3673.97	3099.05	2295.51	1952.26
P17612;P22694	PRKACA;PRKACB	Homo sapiens	cAMP-dependent protein kinase catalytic subunit alpha;cAMP-dependent protein kinase catalytic subunit beta	22670.9	19417	22646.4	19259.5	17001.7	18844.4	17380.5	16446.1	14339.6
P17655	CAPN2	Homo sapiens	Calpain-2 catalytic subunit	18535	20314.2	18713.5	13463.7	8638.2	13430.1	18281.4	17355.8	20366.5
P17676	CEBPB	Homo sapiens	CCAAT/enhancer-binding protein beta	778.549	634.307	1635.44	600.383	673.43	1445.89	2427.71	1560.69	567.223
P17812	CTPS1	Homo sapiens	CTP synthase 1	15194.9	15616.3	13769.1	15224.7	15779.9	15362.8	13004.3	12916.1	14296.6
P17813	ENG	Homo sapiens	Endoglin	2311.29	3546.43	3996.24	4353.72	4452.21	3416.75	9200.81	10284.8	8140.44
P17844	DDX5	Homo sapiens	Probable ATP-dependent RNA helicase DDX5	6250.49	5319.82	6030.8	4753.5	3396.9	3311.41	5197.08	7495.25	6523.2
P17858	PFKL	Homo sapiens	ATP-dependent 6-phosphofructokinase, liver type	6644.12	10176	9596.33	6965.4	8939.19	10466.3	2546.12	3506.94	5313.78
P17936	IGFBP3	Homo sapiens	Insulin-like growth factor-binding protein 3	312.937	226.619	533.517	1713.85	1976.64	1913.8	1.45138	1545.2	281.708
P17980	PSMC3	Homo sapiens	26S proteasome regulatory subunit 6A	28689.9	26767.9	32544.6	29808.9	31430.2	26320.2	26523.1	26050.7	30063.3
P17987	TCP1	Homo sapiens	T-complex protein 1 subunit alpha	243105	244008	235994	253008	278530	270064	159165	170650	153799
P18031	PTPN1	Homo sapiens	Tyrosine-protein phosphatase non-receptor type 1	6791.05	6925.29	6555.04	5408.51	5462.55	6014.29	5081.3	6111.09	5773.06
P18065	IGFBP2	Homo sapiens	Insulin-like growth factor-binding protein 2	32771.1	29392.5	30303.7	39195	39959.2	42570.1	59773.7	61839.4	61828.6
P18077	RPL35A	Homo sapiens	60S ribosomal protein L35a	3779.9	4142.79	5264.38	7316.62	6021.98	6913.8	3413.64	5253.16	6011.19
P18085	ARF4	Homo sapiens	ADP-ribosylation factor 4	26518.7	21520.6	23637.2	19305	15592.3	15999.4	19913.9	19183.4	25432.3
P18124	RPL7	Homo sapiens	60S ribosomal protein L7	6691.22	7108.35	5802.19	4151.36	3616.95	5120.28	8156.21	9751.63	6938.98
P18206	VCL	Homo sapiens	Vinculin	19218.9	21448.2	21993.7	23843.2	23132.1	22150.8	28687.1	29792	28250.7
P18510	IL1RN	Homo sapiens	Interleukin-1 receptor antagonist protein	215.175	8730.05	10542.3	419143	128563	31881.5	NaN	NaN	NaN
P18583	SON	Homo sapiens	Protein SON	NaN	885.768	NaN	NaN	NaN	895.355	2473.71	2634.84	1028.57
P18669	PGAM1	Homo sapiens	Phosphoglycerate mutase 1	38132.5	42361.8	40360.4	35254.5	34661.7	40052.9	74909.1	80132.9	83720.5
P19022	CDH2	Homo sapiens	Cadherin-2	4607.09	5570.82	4431.45	8528.94	6302.86	5205.23	5404.72	5440.44	9468.04
P19338	NCL	Homo sapiens	Nucleolin	16401	17022	17893.9	13991.9	12471	12960.2	19442.2	17200	15655.5
P19397	CD53	Homo sapiens	Leukocyte surface antigen CD53	57117.6	45338.7	45930.5	85988	51689	79571.8	36028.5	32968.6	36819.4
P19440	GGT1	Homo sapiens	Glutathione hydrolase 1 proenzyme	6809.78	8892.05	8660.46	8211.5	8178.96	8202.75	6758.61	5762.22	4567.65
P19474	TRIM21	Homo sapiens	E3 ubiquitin-protein ligase TRIM21	NaN	898.629	NaN	NaN	381.209	NaN	2567.59	2339.42	2926.45
P19525	EIF2AK2	Homo sapiens	Interferon-induced, double-stranded RNA-activated protein kinase	NaN	NaN	NaN	NaN	NaN	NaN	5955.95	4599.64	5883.23
P19784	CSNK2A2	Homo sapiens	Casein kinase II subunit alpha'	2977.61	2516.18	2536.95	862.687	2776.4	340.78	2709.02	5315.06	3251.42
P19823	ITIH2	Homo sapiens	Inter-alpha-trypsin inhibitor heavy chain H2	280495	274000	295219	528677	481266	474450	206716	174236	165535
P19838	NFKB1	Homo sapiens	Nuclear factor NF-kappa-B p105 subunit	2151.19	1545.96	906.605	200.315	2042.31	1021.47	1209.11	2738.24	3543.58
P19878	NCF2	Homo sapiens	Neutrophil cytosol factor 2	15214.5	16593.9	17544.5	3797.18	4625.39	3412.15	4600.16	3894.39	5469.66
P19971	TYMP	Homo sapiens	Thymidine phosphorylase	5873.34	4947.34	4397.9	3865.73	4271.34	2816.26	11086.8	9430.46	12954.6
P20020	ATP2B1	Homo sapiens	Plasma membrane calcium-transporting ATPase 1	4350.91	4549.23	3627.41	8015.47	7923.77	8447.58	7672.48	7111.25	6623.73
P20042	EIF2S2	Homo sapiens	Eukaryotic translation initiation factor 2 subunit 2	2394.9	958.596	2797.83	1218.54	1689.35	NaN	NaN	1.79336	1.26597
P20290	BTF3	Homo sapiens	Transcription factor BTF3	NaN	999.716	2792.55	791.371	2384.13	1611.45	NaN	1382.14	NaN
P20333	TNFRSF1B	Homo sapiens	Tumor necrosis factor receptor superfamily member 1B	4257.05	1434.04	2487.57	1490.95	2626.61	1859.21	14044.6	12715.2	16563.9
P20339	RAB5A	Homo sapiens	Ras-related protein Rab-5A	5731.85	5300.78	3390.33	193.022	1379.35	1925.47	2733.6	2289.08	1538.14
P20340	RAB6A	Homo sapiens	Ras-related protein Rab-6A	5697.51	8253.91	8403.47	6957.88	7157.33	7109.38	11097.1	12913	12897.1
P20591	MX1	Homo sapiens	Interferon-induced GTP-binding protein Mx1	28745.9	23549	28593	13427.4	15150.3	13645.8	191048	190865	184376
P20592	MX2	Homo sapiens	Interferon-induced GTP-binding protein Mx2	NaN	NaN	NaN	1.858	140.994	NaN	2249.22	1776.08	2419.85
P20618	PSMB1	Homo sapiens	Proteasome subunit beta type-1	38492.4	37978.7	34871.5	44238.1	40215.2	36264.7	53137.1	52559	59613.8
P20648	ATP4A	Homo sapiens	Potassium-transporting ATPase alpha chain 1	15287.2	14808.4	19246.7	12990.5	15666.7	15019.6	23588.5	33946.6	25663.3
P20701	ITGAL	Homo sapiens	Integrin alpha-L	1152.88	836.366	876.669	1218.88	1306.65	31.8542	540.11	897.236	804.964
P20702	ITGAX	Homo sapiens	Integrin alpha-X	4472.57	6261.37	5401.14	8077.6	5209.53	7834.59	2176.06	810.653	2143.36
P20742	PZP	Homo sapiens	Pregnancy zone protein	296076	292393	307860	467058	400084	420416	396169	368826	415384
P20774	OGN	Homo sapiens	Mimecan	14728.8	14950.5	14386.8	18565.1	15155.2	15069.9	13940.2	5716.73	12391.6
P20849	COL9A1	Homo sapiens	Collagen alpha-1(IX) chain	5563.1	5198.56	4812.43	7236.02	8111.09	6104.52	9417.58	6262.18	6215.34
P20908	COL5A1	Homo sapiens	Collagen alpha-1(V) chain	11967	39642.8	18346.7	3728.88	10706.6	14669.3	22681.5	15542.6	19676.9
P21127;Q13882;Q9UQ88	CDK11B;PTK6;CDK11A	Homo sapiens	Cyclin-dependent kinase 11B;Protein-tyrosine kinase 6;Cyclin-dependent kinase 11A	1894.96	2496.21	1564.19	1262.61	1551.07	1721.27	1.82142	NaN	343.463
P21281	ATP6V1B2	Homo sapiens	V-type proton ATPase subunit B, brain isoform	21247.6	21254.2	25129.9	24445.7	24069.5	21438.3	13835.7	12239.5	12169.5
P21291	CSRP1	Homo sapiens	Cysteine and glycine-rich protein 1	3108.95	5938.36	3779.49	5773.73	4561.72	5022.53	2847.31	2633.32	1913.27
P21333	FLNA	Homo sapiens	Filamin-A	4481.48	4533.05	4941.88	4810.9	4370.26	4235.26	7072.8	8218.82	6982.66
P21359	NF1	Homo sapiens	Neurofibromin	1708.99	2548.2	2570.62	2112.7	2439.81	2289.51	1845.11	2974.51	3693.46
P21399	ACO1	Homo sapiens	Cytoplasmic aconitate hydratase	71258.1	63217.6	68514.5	79270	70309.5	67513.9	68147.8	74642.6	88054.8
P21589	NT5E	Homo sapiens	5'-nucleotidase	46903.3	49278.7	44085.9	52957	51061.1	50925.2	34669.4	34972.1	35215.4
P21730	C5AR1	Homo sapiens	C5a anaphylatoxin chemotactic receptor 1	33691.6	61182	38432.2	63755.7	70287.8	65751.5	142363	68179	82476
P21926	CD9	Homo sapiens	CD9 antigen	10291.3	3978.88	10982.2	585.57	545.313	9.22664	NaN	281.249	388.812
P21964	COMT	Homo sapiens	Catechol O-methyltransferase	NaN	1122.23	630.865	NaN	NaN	NaN	726.25	894.557	NaN
P21980	TGM2	Homo sapiens	Protein-glutamine gamma-glutamyltransferase 2	150015	155841	164371	275497	294986	305164	70940.8	74536.8	77852.1
P22059	OSBP	Homo sapiens	Oxysterol-binding protein 1	1.03863	1055.61	154.335	1.52635	946.732	343.389	1920.75	1110.31	1.37672
P22102	GART	Homo sapiens	Trifunctional purine biosynthetic protein adenosine-3	4607.17	6604.95	5179.86	4176.8	4405.53	4651.46	6601.09	6425.15	7331.16
P22105	TNXB	Homo sapiens	Tenascin-X	4874.52	2783.04	5559.38	5031.36	6098.08	7408.83	12787.1	9824.96	7326.59
P22234	PAICS	Homo sapiens	Multifunctional protein ADE2	26117.6	25202.1	21273.6	31174.3	32007.3	27909.6	17607.6	15192.8	14643.3
P22303	ACHE	Homo sapiens	Acetylcholinesterase	3770.78	4057.72	3785.29	5981.71	3889.56	4339.75	7655.02	7792.15	8794.51
P22314	UBA1	Homo sapiens	Ubiquitin-like modifier-activating enzyme 1	115697	118271	119982	104248	99530.9	100670	103583	102588	105823
P22528;P35321	SPRR1B;SPRR1A	Homo sapiens	Cornifin-B;Cornifin-A	477.768	NaN	NaN	NaN	NaN	NaN	1.2473	1.1469	NaN
P22531;Q96RM1	SPRR2E;SPRR2F	Homo sapiens	Small proline-rich protein 2E;Small proline-rich protein 2F	8803.23	1620.56	3662.86	1741.76	1160.62	745.419	1744.89	3147.44	918.83
P22626	HNRNPA2B1	Homo sapiens	Heterogeneous nuclear ribonucleoproteins A2/B1	1928.24	1805.44	2139.99	2373.62	1793.91	1893.45	841.379	1199.13	1727.07
P23142	FBLN1	Homo sapiens	Fibulin-1	51235.9	60137.3	52372.1	68645.1	88833.9	78454.5	64669.4	67808.6	66142.2
P23246	SFPQ	Homo sapiens	Splicing factor, proline- and glutamine-rich	5047.49	4135.28	4435.17	4352.93	5287.22	4970.35	1550.92	1527.3	4.0733
P23258;Q9NRH3	TUBG1;TUBG2	Homo sapiens	Tubulin gamma-1 chain;Tubulin gamma-2 chain	832.743	1518.91	2445.46	1333.71	788.689	NaN	1011.36	NaN	NaN
P23284	PPIB	Homo sapiens	Peptidyl-prolyl cis-trans isomerase B	8066.38	6812.93	8955.64	5422.76	5117.99	6043.64	8974.9	11350.9	12113.5
P23368	ME2	Homo sapiens	NAD-dependent malic enzyme, mitochondrial	3507.31	3489.46	NaN	3999.86	NaN	3293.59	3365.05	6849.73	5847.28
P23381	WARS1	Homo sapiens	Tryptophan--tRNA ligase, cytoplasmic	11279.8	12175.4	11719.1	9511.92	8240.98	8902.51	20072.1	18679.2	21522.5
P23396	RPS3	Homo sapiens	40S ribosomal protein S3	85495.4	90025.4	105276	81243.7	73761.9	73922.2	69800.1	61711.8	55305
P23458	JAK1	Homo sapiens	Tyrosine-protein kinase JAK1	NaN	100.123	NaN	352.294	913.947	1053.2	5324.3	3494.13	4356.83
P23469	PTPRE	Homo sapiens	Receptor-type tyrosine-protein phosphatase epsilon	6650.05	6716.5	7499.89	9268.06	5678.57	8094.61	4746	6761.54	10224.7
P23526	AHCY	Homo sapiens	Adenosylhomocysteinase	133583	133654	160563	152807	145974	136299	170622	168803	176387
P23528	CFL1	Homo sapiens	Cofilin-1	39646.5	49597.1	38433.4	64995.2	57855.6	61729.2	79793.4	96837.5	91189.5
P23610	F8A1	Homo sapiens	40-kDa huntingtin-associated protein	9017.52	7513	6605.53	10267.8	5811.55	5250.48	4048.9	6063.36	6194.03
P23634	ATP2B4	Homo sapiens	Plasma membrane calcium-transporting ATPase 4	2954.84	3140	984.826	1410.46	2261.2	2544	1491.5	1861.07	NaN
P23921	RRM1	Homo sapiens	Ribonucleoside-diphosphate reductase large subunit	4773.23	3441.85	5411.76	3970.42	4541.27	5528.18	4915.18	5125.06	3824.32
P24043	LAMA2	Homo sapiens	Laminin subunit alpha-2	NaN	1671.21	2034.35	1.53911	1.20165	1.04449	1.29351	1.26248	1.26537
P24534	EEF1B2	Homo sapiens	Elongation factor 1-beta	758.62	NaN	NaN	643.969	871.277	759.577	NaN	NaN	527.541
P24592	IGFBP6	Homo sapiens	Insulin-like growth factor-binding protein 6	9147.76	18427.7	15465.2	30999.9	32863.8	26629.8	26283.1	26764.8	27709.5
P25106	ACKR3	Homo sapiens	Atypical chemokine receptor 3	NaN	285.298	NaN	4043.9	4559.01	4719.67	412.671	1.14914	NaN
P25205	MCM3	Homo sapiens	DNA replication licensing factor MCM3	4059.92	2732.3	3604.9	2751.83	2514.65	2425.34	2918.81	3169.84	3780.62
P25398	RPS12	Homo sapiens	40S ribosomal protein S12	2148.13	2537.42	2616.99	2847.95	2575.81	1991.9	5.74523	974.033	652.503
P25685	DNAJB1	Homo sapiens	DnaJ homolog subfamily B member 1	11281.1	11956.7	8786.19	6638.06	7629.7	7241.83	6283.85	7002.89	6816.45
P25705	ATP5F1A	Homo sapiens	ATP synthase subunit alpha, mitochondrial	13593.3	4543.12	6085.88	7447.3	10448.3	NaN	31480	37283.1	30883.4
P25774	CTSS	Homo sapiens	Cathepsin S	10126	5396.76	10280.9	22402.3	4596.45	10913.6	4676.92	12287.2	12476.2
P25786	PSMA1	Homo sapiens	Proteasome subunit alpha type-1	54748.7	68030.1	55982.9	61997	70952.9	77155.8	68817	74909.1	81818.7
P25787	PSMA2	Homo sapiens	Proteasome subunit alpha type-2	12031.3	9440.82	13703.6	10534.4	14114.2	12612.8	11934.4	8894.42	14866.9
P25788	PSMA3	Homo sapiens	Proteasome subunit alpha type-3	14886.5	15655.7	14933.5	14058.4	13345.1	15734.6	20000.9	12984.2	20992
P25789	PSMA4	Homo sapiens	Proteasome subunit alpha type-4	288100	43668.8	170536	278061	224097	242322	1563.7	1383.7	55514.5
P25942	CD40	Homo sapiens	Tumor necrosis factor receptor superfamily member 5	52363	71652.4	100067	50394.4	75422.1	189385	196527	56376.4	214129
P26038	MSN	Homo sapiens	Moesin	74284.4	76605.8	76746.2	67960	67053.1	69057.5	37399.7	50091.6	41077.3
P26196	DDX6	Homo sapiens	Probable ATP-dependent RNA helicase DDX6	5559.73	3689.73	4502.52	4475.92	4291.59	3363.41	2139.01	2066.81	1727.73
P26447	S100A4	Homo sapiens	Protein S100-A4	14115.5	9634.75	16208.8	16145.5	10375.9	10999.2	3603.57	3818.22	4930.21
P26639	TARS1	Homo sapiens	Threonine--tRNA ligase 1, cytoplasmic	5096.42	4263.95	5469.03	5847.43	4569.35	4429.02	3384.28	5579.07	4191.65
P26640	VARS1	Homo sapiens	Valine--tRNA ligase	23783.7	23631.3	24709	19554.9	18374.3	16603.7	14566	14419.5	18038.7
P26641	EEF1G	Homo sapiens	Elongation factor 1-gamma	43814.3	59529.3	56062.9	58697	56282.4	58248.9	56596.2	51459.1	63673.6
P26927	MST1	Homo sapiens	Hepatocyte growth factor-like protein	189862	171139	190083	216118	166499	204316	200115	195622	233046
P27105	STOM	Homo sapiens	Stomatin	14379.3	14550.1	13146.8	11790.2	12363.4	16028.5	24077.6	23342.5	21331.6
P27348	YWHAQ	Homo sapiens	14-3-3 protein theta	10733.6	10276.8	13965.5	11141.8	14446.3	8794.01	15325.7	11947.2	12739.5
P27361	MAPK3	Homo sapiens	Mitogen-activated protein kinase 3	4009.19	3518.56	3657.14	2653.18	3100.45	2463.71	4991.99	3974.82	3241.48
P27487	DPP4	Homo sapiens	Dipeptidyl peptidase 4	0.657503	NaN	NaN	0.666227	NaN	1.08583	1.73383	1.71215	1.56675
P27635	RPL10	Homo sapiens	60S ribosomal protein L10	8690.07	9139.97	8828.5	6823.02	7813.58	6924.63	10458.9	7711.48	13500
P27701	CD82	Homo sapiens	CD82 antigen	15770.4	12017.3	29015.1	12484.8	8405.07	11636.9	9979.48	9471.43	8790.82
P27708	CAD	Homo sapiens	CAD protein	5419.77	6895.86	6056.63	8541.38	6885.89	7338.92	7173.57	7226.81	7242.53
P27797	CALR	Homo sapiens	Calreticulin	3977.14	6574.05	6066.98	4166.81	4878.92	6613.78	10944.7	11788.4	16234.9
P27824	CANX	Homo sapiens	Calnexin	3281.61	1797.82	2092.71	1616.69	2160.93	1113.5	10416.1	16030.4	13838.2
P28062	PSMB8	Homo sapiens	Proteasome subunit beta type-8	12503.3	12430.5	14016.8	12597.7	9394.35	10968.5	15463.1	14580.7	18764.9
P28065	PSMB9	Homo sapiens	Proteasome subunit beta type-9	24330.3	22164.4	24628	29767.8	28741.1	27140.1	31321.9	29120	28878.5
P28066	PSMA5	Homo sapiens	Proteasome subunit alpha type-5	99386	92649.3	108913	114931	115851	121659	113186	124904	105613
P28070	PSMB4	Homo sapiens	Proteasome subunit beta type-4	69227.4	74680	76296.4	67952.5	84332	78224.8	117450	99195.3	129381
P28072	PSMB6	Homo sapiens	Proteasome subunit beta type-6	5948.97	5886.86	5480.82	9054.24	7725.58	8566.21	2375.79	1259.09	2615.39
P28074	PSMB5	Homo sapiens	Proteasome subunit beta type-5	4038.56	3412.67	4714.3	4402.09	3963.27	4953.51	2424.47	2885.17	3474.09
P28358	HOXD10	Homo sapiens	Homeobox protein Hox-D10	NaN	NaN	1.24575	3.49567	NaN	0.00560097	7.02263	NaN	0.00449583
P28482	MAPK1	Homo sapiens	Mitogen-activated protein kinase 1	21849.4	24891.6	22624.6	22699.8	27552.2	20801.2	51263.8	42552.6	44055.6
P28838	LAP3	Homo sapiens	Cytosol aminopeptidase	15521.4	16822	17103.3	16957.1	14821.9	15986.2	50775	53288.8	57256.7
P29144	TPP2	Homo sapiens	Tripeptidyl-peptidase 2	92204.1	97703.8	103329	135183	118256	125821	36223	41352.5	37857.6
P29350	PTPN6	Homo sapiens	Tyrosine-protein phosphatase non-receptor type 6	51826.7	50872.7	48882.3	17305.1	18298	24884.6	24476.9	30901.6	20338.4
P29372	MPG	Homo sapiens	DNA-3-methyladenine glycosylase	3525.67	4161.8	4396.9	2822.49	1081.19	NaN	NaN	NaN	941.008
P29401	TKT	Homo sapiens	Transketolase	25098	26486.3	27425.6	16537.7	17620.4	18190.3	13419.9	11563	14886
P29590	PML	Homo sapiens	Protein PML	NaN	NaN	NaN	NaN	NaN	NaN	0.717677	1.62457	1
P29692	EEF1D	Homo sapiens	Elongation factor 1-delta	6585.21	5536.12	5878.38	8038.87	7528.23	8309.52	6261.08	4753.23	4904.19
P29728	OAS2	Homo sapiens	2'-5'-oligoadenylate synthase 2	634.652	1717.01	977.948	498.331	1090.14	1629.78	11856.1	11960.5	12538.2
P30039	PBLD	Homo sapiens	Phenazine biosynthesis-like domain-containing protein	11366.9	11777.9	14941.3	12374.1	15493.3	10046.9	16575.6	14201.9	14342.1
P30040	ERP29	Homo sapiens	Endoplasmic reticulum resident protein 29	486.099	408.838	NaN	NaN	1591.23	NaN	2831.17	4124.9	3008.83
P30041	PRDX6	Homo sapiens	Peroxiredoxin-6	4765.75	5249.78	5367.02	4655.92	3874.64	3507.79	7207.34	5510.83	6525.08
P30048	PRDX3	Homo sapiens	Thioredoxin-dependent peroxide reductase, mitochondrial	2772.78	2222.2	3309.42	2897.83	2525.76	2260.81	1933.42	3183.52	2863.26
P30050	RPL12	Homo sapiens	60S ribosomal protein L12	41271.2	39469.6	40842.2	22329.1	15986.2	18764.7	17496.1	22078	20098.1
P30101	PDIA3	Homo sapiens	Protein disulfide-isomerase A3	5878.94	6090.36	5469.25	4520.45	4193.67	3772.99	8726.6	9786.81	9503.7
P30153	PPP2R1A	Homo sapiens	Serine/threonine-protein phosphatase 2A 65 kDa regulatory subunit A alpha isoform	13621.4	13338	14487.9	14122	10112.3	10719.8	12545.1	12439.7	14483.7
P30154	PPP2R1B	Homo sapiens	Serine/threonine-protein phosphatase 2A 65 kDa regulatory subunit A beta isoform	1534.83	1218.72	707.438	280.26	1499.89	776.053	1779.27	2782.34	2089.7
P30273	FCER1G	Homo sapiens	High affinity immunoglobulin epsilon receptor subunit gamma	8978.93	7825.68	9090.1	34985.9	36144.4	39048.8	84473.1	68393.9	67240.4
P30419	NMT1	Homo sapiens	Glycylpeptide N-tetradecanoyltransferase 1	773.309	1521.73	1564.73	1468.21	2555.98	3347.95	306.313	NaN	373.822
P30520	ADSS2	Homo sapiens	Adenylosuccinate synthetase isozyme 2	10709.3	8507.84	9494.5	12838.1	10683.3	11872.7	6368.56	6744.19	9005.45
P30566	ADSL	Homo sapiens	Adenylosuccinate lyase	3428.15	3084.95	3647.87	2935.05	2115.97	1911.98	3329.58	4838.69	2797.95
P30613	PKLR	Homo sapiens	Pyruvate kinase PKLR	1997.02	2643.85	2260.63	5380.67	2562.11	2720.47	976.325	2270.75	2576.09
P30876	POLR2B	Homo sapiens	DNA-directed RNA polymerase II subunit RPB2	5202.28	11433.8	7618.89	6506.18	9690.39	4825.33	6473.89	6890.74	5157.01
P31040	SDHA	Homo sapiens	Succinate dehydrogenase [ubiquinone] flavoprotein subunit, mitochondrial	3960.34	3812.93	3842.81	3113.85	2981.89	2334.34	9693.04	6216.33	7354.02
P31146	CORO1A	Homo sapiens	Coronin-1A	36021.9	38283.6	35902.6	39994.3	40126	40147.5	38250.3	37598.4	38214.5
P31153	MAT2A	Homo sapiens	S-adenosylmethionine synthase isoform type-2	30229	42291.6	35496.2	35200.6	41330	39250.1	25500.8	41532.4	40290.5
P31431	SDC4	Homo sapiens	Syndecan-4	3710.01	4242.32	2412.17	617.679	2853.32	6100.87	2536.12	2285.23	2688.74
P31689	DNAJA1	Homo sapiens	DnaJ homolog subfamily A member 1	8128.25	4959.18	5787.07	5817.56	8758.47	7726.19	7881.68	7062.18	9237.07
P31939	ATIC	Homo sapiens	Bifunctional purine biosynthesis protein ATIC	26303.6	25888.8	27093.4	36687.9	28415.2	32633.8	23027.5	22919.4	20137.5
P31943	HNRNPH1	Homo sapiens	Heterogeneous nuclear ribonucleoprotein H	6157.2	6292.54	6437.62	6915.78	5678.77	6804.73	7122.51	5231.98	6978.54
P31946	YWHAB	Homo sapiens	14-3-3 protein beta/alpha	113089	17034	47824.2	371.916	4896.83	651.134	214.738	1054.74	1268.37
P31948	STIP1	Homo sapiens	Stress-induced-phosphoprotein 1	7500.35	9512.71	8196.27	11076	12388.8	10621.2	9413.6	9976.73	8510.25
P31949	S100A11	Homo sapiens	Protein S100-A11	81777.2	71564.6	73393.6	122147	105588	92449.8	51161.1	60201.3	68375
P32119	PRDX2	Homo sapiens	Peroxiredoxin-2	7977.15	10622.5	11288.5	8711.02	6351.5	7185.17	5290.64	4271.66	4736.12
P32189;Q14409	GK;GK3P	Homo sapiens	Glycerol kinase;Glycerol kinase 3	3894.03	5764.69	4057.5	2088.68	2255.81	3817.6	3181.86	1271.88	2237.86
P32754	HPD	Homo sapiens	4-hydroxyphenylpyruvate dioxygenase	7560.19	9385.69	6798.29	8864.4	9397.83	9488.45	12056.5	11220.7	12163.9
P32969	RPL9	Homo sapiens	60S ribosomal protein L9	2679.35	4402.05	2591.81	2616.93	5025	4674.44	2339.89	1653.76	2887.92
P32970	CD70	Homo sapiens	CD70 antigen	2.14668	NaN	NaN	0.00160868	1.82264	NaN	NaN	2.05064	0.00321313
P33121	ACSL1	Homo sapiens	Long-chain-fatty-acid--CoA ligase 1	7752.31	7406.25	8712.7	6884.13	6802.19	3683.29	16087.9	16030.5	13015.4
P33176	KIF5B	Homo sapiens	Kinesin-1 heavy chain	6951.39	9466.98	7741.04	8726.67	9192.17	8422.28	5931.2	7316.93	5746.05
P33240	CSTF2	Homo sapiens	Cleavage stimulation factor subunit 2	2927.01	4333	2611.17	2680.6	2860.92	3435.31	4028.25	2158.32	1418.28
P33908	MAN1A1	Homo sapiens	Mannosyl-oligosaccharide 1,2-alpha-mannosidase IA	46913.2	45566	46880.5	51583	48769	52687.2	33257.1	29867.7	56823.3
P33992	MCM5	Homo sapiens	DNA replication licensing factor MCM5	9295.82	9894.47	10292.1	7787.03	6403.88	8334.52	10460	14774.3	15450.8
P34096	RNASE4	Homo sapiens	Ribonuclease 4	2381.57	4184.46	3320.73	3991.15	5669.97	3697.56	NaN	2002.39	1664.51
P34741	SDC2	Homo sapiens	Syndecan-2	89591.7	86070.6	86453	98469.3	122528	101686	266951	269077	278926
P34896	SHMT1	Homo sapiens	Serine hydroxymethyltransferase, cytosolic	2939.25	3162.27	3896.84	3746.77	2579.32	3884.72	5676.96	4665.51	4784.54
P34897	SHMT2	Homo sapiens	Serine hydroxymethyltransferase, mitochondrial	3541.06	2611.52	4622.47	2539.23	1589.57	1555.81	5077.02	5411.97	4235.68
P34910	EVI2B	Homo sapiens	Protein EVI2B	1589.52	2010.5	2052.32	888.081	439.084	1759.67	3397.85	2509.06	3499.13
P34931	HSPA1L	Homo sapiens	Heat shock 70 kDa protein 1-like	8803.67	12837.8	8961.88	10221.3	7932.14	7840.42	13388.7	14396.8	14023.6
P34932	HSPA4	Homo sapiens	Heat shock 70 kDa protein 4	8497.74	10308.5	8491.85	7572.28	7902.09	7106.55	6550.69	4547.26	6815.64
P35030	PRSS3	Homo sapiens	Trypsin-3	129022	119176	157362	81422.2	46197.1	66074	35243.8	30181.8	43328
P35052	GPC1	Homo sapiens	Glypican-1	4020.83	2305.13	2678.12	2748.17	3226.51	3597.5	2933.76	2695.39	671.334
P35236	PTPN7	Homo sapiens	Tyrosine-protein phosphatase non-receptor type 7	1021.71	853.769	1967.31	1002.56	1509.67	2517.08	195.246	636.634	427.262
P35241	RDX	Homo sapiens	Radixin	18154.3	17012.8	20999.1	16733	15926	15044.3	13687.9	13922.8	11657.5
P35268	RPL22	Homo sapiens	60S ribosomal protein L22	4722.89	7021.13	4893.12	6974.23	6562.09	7557.52	5483.59	NaN	10090.1
P35443	THBS4	Homo sapiens	Thrombospondin-4	42949	39269.2	44105.8	52361.1	56142.6	55348.7	54651.5	51200	45242.4
P35520	CBS	Homo sapiens	Cystathionine beta-synthase	3511.46	3065.28	4645.13	3865.12	3753.51	2785.06	1647.55	1887.18	2099.78
P35527	KRT9	Homo sapiens	Keratin, type I cytoskeletal 9	1.5491e+06	261621	309132	208759	459472	277065	851506	978028	119718
P35573	AGL	Homo sapiens	Glycogen debranching enzyme	5082.7	5060.99	6161.26	8852.16	5724.9	6250.73	3184.26	4339.25	8278.47
P35579	MYH9	Homo sapiens	Myosin-9	113659	116810	121467	95319.9	108342	101205	93018.4	102883	101317
P35606	COPB2	Homo sapiens	Coatomer subunit beta'	28327.8	26509.6	27789.4	21498.9	22822.1	24340.3	28413	31514.3	27186.1
P35613	BSG	Homo sapiens	Basigin	22865.3	25195.2	24119.7	41298.9	30493.6	34838.6	25165.2	25814.1	26053.1
P35858	IGFALS	Homo sapiens	Insulin-like growth factor-binding protein complex acid labile subunit	1898.62	3606.39	1818.83	3734.29	2875.83	3070.98	2303.71	3861.86	4326.91
P35908	KRT2	Homo sapiens	Keratin, type II cytoskeletal 2 epidermal	1.07995e+06	233079	196122	191184	313515	450305	629890	521995	695046
P35998	PSMC2	Homo sapiens	26S proteasome regulatory subunit 7	85017.6	83562.6	84337.1	90101.3	75475.6	85459.7	74554.4	68368.1	65553.5
P36222	CHI3L1	Homo sapiens	Chitinase-3-like protein 1	6864.42	8436.53	7451.08	3380.2	1938.46	1941.9	6586.05	3524.23	2507.93
P36507;Q02750	MAP2K2;MAP2K1	Homo sapiens	Dual specificity mitogen-activated protein kinase kinase 2;Dual specificity mitogen-activated protein kinase kinase 1	9235.78	5988.42	6634.24	4061.51	4940.83	7087.02	7197.77	7694.26	4656.14
P36578	RPL4	Homo sapiens	60S ribosomal protein L4	6101.99	2752.09	5805	5440.77	7422.07	5269.94	15150.3	11881.7	10687.2
P36871	PGM1	Homo sapiens	Phosphoglucomutase-1	14298.1	14178.5	13915	14568.6	12037.6	13149.1	14454.7	14293	12302
P36955	SERPINF1	Homo sapiens	Pigment epithelium-derived factor	320065	323025	308416	402456	372649	391275	517873	490074	574704
P36969	GPX4	Homo sapiens	Phospholipid hydroperoxide glutathione peroxidase	1044.61	1411	1857.12	738.184	NaN	1321.21	421.756	486.663	182.402
P37802	TAGLN2	Homo sapiens	Transgelin-2	16694.8	22406.3	19254.1	14714.9	13064.2	9978.7	11493.8	12127.9	11569.7
P37837	TALDO1	Homo sapiens	Transaldolase	18554.3	15155.5	21270.3	16540.8	13480.6	17045.8	13953.4	12116.7	16574.9
P38117	ETFB	Homo sapiens	Electron transfer flavoprotein subunit beta	11143.3	12578	11176.6	6138.2	6445.7	4508.71	19713.9	18160	17726.2
P38606	ATP6V1A	Homo sapiens	V-type proton ATPase catalytic subunit A	16825.8	14622.9	15611	14301.6	13048.4	11470.5	5576.75	7147.27	7261.43
P38646	HSPA9	Homo sapiens	Stress-70 protein, mitochondrial	9376.92	7402.9	8058.37	9345.52	8440.9	8797.81	8321.89	6578.85	7203.65
P38919	EIF4A3	Homo sapiens	Eukaryotic initiation factor 4A-III	3327.94	2731.25	3290.34	1738.93	1702.31	1752.12	2142	2641.8	3184.42
P39023	RPL3	Homo sapiens	60S ribosomal protein L3	2828.87	3481.38	3825.78	3121.74	3950.43	2801.23	4955.96	5726.7	6828.54
P39748	FEN1	Homo sapiens	Flap endonuclease 1	1915.28	2131.18	2137.09	2546.92	930.226	1803.82	1898.92	2344.88	5113.8
P39900	MMP12	Homo sapiens	Macrophage metalloelastase	7179.59	6036.85	7220.47	8955.4	9575.3	11635.7	3923.28	3928.01	3924
P40121	CAPG	Homo sapiens	Macrophage-capping protein	2139.77	1624.83	2453.85	873.329	1517.68	2488.06	306.51	830.599	7.10683
P40189	IL6ST	Homo sapiens	Interleukin-6 receptor subunit beta	0.761729	NaN	NaN	1	NaN	NaN	NaN	254.823	830.46
P40227	CCT6A	Homo sapiens	T-complex protein 1 subunit zeta	91250.9	85797.3	91255	97657.8	100365	86543.3	51601.6	47613.2	46092.9
P40306	PSMB10	Homo sapiens	Proteasome subunit beta type-10	9367.56	9285.63	8239.72	9932.06	7595.88	7173.42	22699.6	25410.2	25532.4
P40429;Q6NVV1	RPL13A;RPL13AP3	Homo sapiens	60S ribosomal protein L13a;Putative 60S ribosomal protein L13a protein RPL13AP3	8150.76	9080.61	8182.42	11805	9619.62	11390.1	7874.76	8046.36	8349.35
P40925	MDH1	Homo sapiens	Malate dehydrogenase, cytoplasmic	8107.2	8006	8326.13	7114.15	6661.19	6368.42	5442.94	5435.04	5895.17
P40926	MDH2	Homo sapiens	Malate dehydrogenase, mitochondrial	6113.2	5745.12	6349.65	3317.13	4771.9	4864.91	4028.67	2729.6	3560.22
P40939	HADHA	Homo sapiens	Trifunctional enzyme subunit alpha, mitochondrial	1317.76	1196.13	414.814	515.594	172.379	298.902	2805.93	3436.41	3791.42
P41091	EIF2S3	Homo sapiens	Eukaryotic translation initiation factor 2 subunit 3	17445.8	18371.3	18005.9	15814.1	11618.9	12858.2	15823.8	17926.9	16731.8
P41218	MNDA	Homo sapiens	Myeloid cell nuclear differentiation antigen	14887	6684.01	3095.3	NaN	NaN	NaN	1133.69	NaN	NaN
P41226	UBA7	Homo sapiens	Ubiquitin-like modifier-activating enzyme 7	762.882	2451.15	1926.56	374.593	NaN	NaN	3979.98	6553.27	7142.7
P41227	NAA10	Homo sapiens	N-alpha-acetyltransferase 10	4230.72	6395.18	6763.87	6086.88	4517.6	4914.49	2360.1	3588.94	2513.32
P41240	CSK	Homo sapiens	Tyrosine-protein kinase CSK	11058.2	5432.33	10228.2	120.379	3402.75	2009.79	4627.46	3399.84	4207.14
P41250	GARS1	Homo sapiens	Glycine--tRNA ligase	8610.92	8593.54	8396.15	7169.93	7063.93	7624.11	7039.34	8127.64	8846.07
P41252	IARS1	Homo sapiens	Isoleucine--tRNA ligase, cytoplasmic	26802.8	28147	25963.7	19437.1	17928.2	19008.1	17893.1	19490.7	20651
P41594	GRM5	Homo sapiens	Metabotropic glutamate receptor 5	33076.7	24594	25447.6	20584.7	34438.3	27904.1	48787.6	146217	38703
P42025	ACTR1B	Homo sapiens	Beta-centractin	9701.07	7402.1	6442.42	4362.53	1599.95	2442.71	652.268	2921.7	2032.94
P42224	STAT1	Homo sapiens	Signal transducer and activator of transcription 1-alpha/beta	2427.92	2356.3	1011.61	104.15	194.024	386.275	15017.9	10918.3	13649.4
P42679	MATK	Homo sapiens	Megakaryocyte-associated tyrosine-protein kinase	8968.47	3554.24	1770.23	4070.21	1353.12	1836.44	701.153	385.861	1589.35
P42858	HTT	Homo sapiens	Huntingtin	7618.78	6609.91	7730.15	5966.65	4604.6	5344.76	2035.87	3672.97	3712.59
P43007	SLC1A4	Homo sapiens	Neutral amino acid transporter A	11266.8	11560.9	13580.4	6735.48	4696.96	5546.69	2481.64	3296.14	5388.55
P43034	PAFAH1B1	Homo sapiens	Platelet-activating factor acetylhydrolase IB subunit beta	4988.47	9270.04	4702.13	9974.96	6964.98	8600.07	6284.91	6724.96	9381.3
P43243	MATR3	Homo sapiens	Matrin-3	3774.63	3502.9	3414.42	2527.21	1101.78	1458.82	4411.39	4603.83	4680.19
P43405	SYK	Homo sapiens	Tyrosine-protein kinase SYK	1576.13	3984.07	1214.6	1660.95	1224.62	2146.12	1785.58	3679.01	3590.21
P43487	RANBP1	Homo sapiens	Ran-specific GTPase-activating protein	7343.15	4512.14	7635.4	6557.11	4905.79	5975.58	4713.95	5086.4	5514.5
P43490	NAMPT	Homo sapiens	Nicotinamide phosphoribosyltransferase	11515.4	10776.6	10894.3	20705.8	13442.6	16871.1	8909.67	5819.44	9588.06
P43652	AFM	Homo sapiens	Afamin	76315.4	33364.5	83086.4	95972.7	92148	40924.7	97079.8	88219.6	84688.5
P43686	PSMC4	Homo sapiens	26S proteasome regulatory subunit 6B	26220	30605.4	33656.2	31441.4	25812.3	28235.9	25740.4	22485	29625
P45974	USP5	Homo sapiens	Ubiquitin carboxyl-terminal hydrolase 5	5282.49	7064.19	5623.71	6161.19	5392.81	6366.3	7173.23	4936.81	4653.53
P46060	RANGAP1	Homo sapiens	Ran GTPase-activating protein 1	2038.14	1144.43	NaN	1575	1321.13	1969.74	1159.91	NaN	891.176
P46063	RECQL	Homo sapiens	ATP-dependent DNA helicase Q1	9325.64	4599.34	4372.15	9755.1	7338.18	7410.5	3104.16	4708.32	6163.26
P46087	NOP2	Homo sapiens	Probable 28S rRNA (cytosine(4447)-C(5))-methyltransferase	4267.82	3880.31	3271.97	2768.88	2449.78	1063.61	NaN	NaN	NaN
P46459	NSF	Homo sapiens	Vesicle-fusing ATPase	11451.1	10759.7	11946.7	9127.28	7579.99	5504.37	11022.9	12326.4	11973.4
P46531	NOTCH1	Homo sapiens	Neurogenic locus notch homolog protein 1	3273.92	3249.82	2331.53	723.013	1395.18	1511.09	798.826	794.365	912.56
P46776	RPL27A	Homo sapiens	60S ribosomal protein L27a	35870.4	33275.2	31122.6	38565.1	36360.9	37340.4	48000.1	48421	46379
P46777	RPL5	Homo sapiens	60S ribosomal protein L5	18917.4	19662	17792	15884.6	14817.9	15024.3	16976.8	14330.7	17189
P46778	RPL21	Homo sapiens	60S ribosomal protein L21	5093.37	5998.41	5392.81	6934.46	5743.02	7338.63	8829.68	5580.16	7397.56
P46779	RPL28	Homo sapiens	60S ribosomal protein L28	15476.4	9908.79	16179.8	7812.06	7646.4	9893.81	16906.1	15495.1	15549.8
P46781	RPS9	Homo sapiens	40S ribosomal protein S9	13246.1	12337.6	13965.9	18860.8	11203.9	12033.2	10153.8	11272.6	11106.3
P46821	MAP1B	Homo sapiens	Microtubule-associated protein 1B	919.104	1052.51	1263.42	2924.93	1662.61	2306.66	724.286	939.731	991.579
P46940	IQGAP1	Homo sapiens	Ras GTPase-activating-like protein IQGAP1	16059	17336.9	15629.9	6712.45	7935.77	8648.02	4974.56	6418.34	6005.37
P47755	CAPZA2	Homo sapiens	F-actin-capping protein subunit alpha-2	3736.66	3979.04	5836.18	7135.69	4476.38	5972.55	13005.7	14559.7	13710.7
P47756	CAPZB	Homo sapiens	F-actin-capping protein subunit beta	4892.09	5245.61	5421.57	4946.35	3826.88	3976.07	5714.32	5602.87	4338.77
P47897	QARS1	Homo sapiens	Glutamine--tRNA ligase	577.928	1672.66	1548.57	NaN	1436.2	399.022	NaN	NaN	NaN
P47989	XDH	Homo sapiens	Xanthine dehydrogenase/oxidase	0.974688	182.693	NaN	1.15831	NaN	NaN	1.59685	NaN	0.664828
P48059	LIMS1	Homo sapiens	LIM and senescent cell antigen-like-containing domain protein 1	4688.31	3276.13	2141.73	5126.4	4253.36	3993.04	2971.25	2277.18	3638.44
P48147	PREP	Homo sapiens	Prolyl endopeptidase	6999.03	18476.8	8275.53	12283.6	9696.67	5888.22	12257.1	5818.05	694.507
P48444	ARCN1	Homo sapiens	Coatomer subunit delta	9091.74	7171.86	6851	10216	6968.81	10812.2	9705.6	7905.05	11517.2
P48506	GCLC	Homo sapiens	Glutamate--cysteine ligase catalytic subunit	1976.14	1079.49	1190.15	5119.56	6253.38	5626.62	5085.43	4552.68	3693.61
P48509	CD151	Homo sapiens	CD151 antigen	15895.9	14804.1	17171.8	29635.7	21040.3	23889.8	8525.49	8101.22	8899.39
P48556	PSMD8	Homo sapiens	26S proteasome non-ATPase regulatory subunit 8	5870.36	4069.94	5525.35	5615.3	4378.01	4487.81	1324.69	3931.49	1112.59
P48643	CCT5	Homo sapiens	T-complex protein 1 subunit epsilon	59575	56265.2	59053	63684.9	73541.7	64983.8	39969.1	35963.8	41666.5
P48735	IDH2	Homo sapiens	Isocitrate dehydrogenase [NADP], mitochondrial	1102.65	3313.32	1219.37	1275.15	1741.87	318.36	2099.93	3235.35	2547.1
P48740	MASP1	Homo sapiens	Mannan-binding lectin serine protease 1	1159.58	1517.19	1690.85	2268.22	5125.95	5984.02	NaN	NaN	3019.61
P48775	TDO2	Homo sapiens	Tryptophan 2,3-dioxygenase	NaN	NaN	NaN	NaN	331.08	NaN	4014.79	2643.79	3968.99
P48960	ADGRE5	Homo sapiens	Adhesion G protein-coupled receptor E5	5112.26	4539.37	3680.99	6385.3	5383.32	6553.04	4610.81	4297.13	6882.43
P49006	MARCKSL1	Homo sapiens	MARCKS-related protein	316.478	678.7	1167.4	360.629	1641.6	1300.73	928.136	1520.15	1571.5
P49189	ALDH9A1	Homo sapiens	4-trimethylaminobutyraldehyde dehydrogenase	5958.85	7135.39	7891.6	5607.02	6406.24	4213.32	4480.32	2196.19	3125.22
P49257	LMAN1	Homo sapiens	Protein ERGIC-53	4637.32	4161.56	4205.12	1069.02	1475.39	965.246	4929.04	6667.75	5647.73
P49327	FASN	Homo sapiens	Fatty acid synthase	72748.8	75782.3	81372.4	53977	51586.8	57292.4	37512.4	37490.8	39789.6
P49368	CCT3	Homo sapiens	T-complex protein 1 subunit gamma	203556	183119	179129	228378	206955	228162	126951	129087	143158
P49411	TUFM	Homo sapiens	Elongation factor Tu, mitochondrial	5060.57	5726.05	4687.21	4225.03	4453.7	5046.68	6238.44	9256.1	5779.68
P49585;Q9Y5K3	PCYT1A;PCYT1B	Homo sapiens	Choline-phosphate cytidylyltransferase A;Choline-phosphate cytidylyltransferase B	4776.95	4458.71	4521.71	1461.81	2796.57	1822.61	NaN	949.844	897.456
P49588	AARS1	Homo sapiens	Alanine--tRNA ligase, cytoplasmic	5202.57	3513.45	3483.94	3175.14	3138.13	2714.02	1982.49	1373.06	1199.33
P49591	SARS1	Homo sapiens	Serine--tRNA ligase, cytoplasmic	15197.3	16780.6	19325.2	11099.4	11092.5	14518	17868.1	18093.4	18706
P49720	PSMB3	Homo sapiens	Proteasome subunit beta type-3	16412.5	32039.6	13511.7	51697.1	56030.1	32007	15823.8	29377.4	907.248
P49721	PSMB2	Homo sapiens	Proteasome subunit beta type-2	26305.6	31848.1	33773.1	28495.6	27691.3	36915.8	43693.9	39997.6	53143.1
P49736	MCM2	Homo sapiens	DNA replication licensing factor MCM2	5047.62	5489.94	5353.68	6605.2	3764.54	5058.27	1872.52	1648.05	4806.84
P49747	COMP	Homo sapiens	Cartilage oligomeric matrix protein	88995.5	96109.7	94983.9	101476	104778	114076	78224.8	92310.1	110519
P49755	TMED10	Homo sapiens	Transmembrane emp24 domain-containing protein 10	4517.85	4081.04	2658.48	2642.97	2539.3	3036.67	9038.62	10001.7	8096.39
P49757	NUMB	Homo sapiens	Protein numb homolog	3055.72	1664.99	3423.34	2110.47	1377.93	1336.63	NaN	NaN	NaN
P49841	GSK3B	Homo sapiens	Glycogen synthase kinase-3 beta	5774.94	3435.22	4563.02	5064.04	2892.67	2778.68	5660.91	4380.21	6903.05
P49915	GMPS	Homo sapiens	GMP synthase [glutamine-hydrolyzing]	4279.04	4230.68	3553.32	3634.97	2749.43	2373.49	2710.1	959.579	1928.42
P50135	HNMT	Homo sapiens	Histamine N-methyltransferase	614.898	492.573	269.666	0.709894	118.876	NaN	NaN	593.578	174.187
P50151	GNG10	Homo sapiens	Guanine nucleotide-binding protein G(I)/G(S)/G(O) subunit gamma-10	3464.31	1838.07	2674.75	3467.12	4194.25	3033.38	2214.21	1677.04	3706.76
P50281	MMP14	Homo sapiens	Matrix metalloproteinase-14	25866.9	27755	30506.6	27310.1	26498.7	28208.8	21222.4	15777.1	24153
P50395	GDI2	Homo sapiens	Rab GDP dissociation inhibitor beta	14051.7	15037	14339.5	15354	17968.1	15695.6	23057.8	20400.7	19663.2
P50452	SERPINB8	Homo sapiens	Serpin B8	2370.06	1969.67	1230.47	1807.04	NaN	1252.47	547.078	828.051	585.277
P50454	SERPINH1	Homo sapiens	Serpin H1	2071.52	2856.93	2343.38	1781.63	2094.8	1638.34	1719.78	2920.09	2897.3
P50502;Q8IZP2	ST13;ST13P4	Homo sapiens	Hsc70-interacting protein;Putative protein FAM10A4	6186.52	4661.79	4674.47	5367.15	3832.3	4782.67	5627.52	3441.95	3169.73
P50552	VASP	Homo sapiens	Vasodilator-stimulated phosphoprotein	22065.2	25266.8	26226.1	21212.8	21566	16145.3	19688.6	22696.6	22171.6
P50570	DNM2	Homo sapiens	Dynamin-2	6594.52	6914.76	6974.96	3881.25	4247.03	5414.68	4012.71	4626.91	2902.27
P50897	PPT1	Homo sapiens	Palmitoyl-protein thioesterase 1	20735.7	18872.6	19315.9	41917.3	38254.1	42438.8	38161.9	38583.5	42594.7
P50990	CCT8	Homo sapiens	T-complex protein 1 subunit theta	160042	164726	181284	167004	192920	188830	115892	105587	96370.7
P50991	CCT4	Homo sapiens	T-complex protein 1 subunit delta	69010.8	64912.7	73160.1	74081	71353.3	70814.2	44957.1	45449.4	41259.2
P50995	ANXA11	Homo sapiens	Annexin A11	52341.5	46413	48380.3	49432.6	43857.2	46468.3	73671.5	65294.7	73468.1
P51148	RAB5C	Homo sapiens	Ras-related protein Rab-5C	22167.7	22294.1	22223.7	29349.8	33872.8	28152.8	60542.2	60890.6	54237.2
P51149	RAB7A	Homo sapiens	Ras-related protein Rab-7a	40852.6	36351.8	37317.5	77063.4	42634.6	46235.2	55391.7	53758.8	65639.1
P51153	RAB13	Homo sapiens	Ras-related protein Rab-13	9892.86	9347.79	9707.71	10366.1	7299.53	8566.61	9617.03	8594.23	6035.93
P51159	RAB27A	Homo sapiens	Ras-related protein Rab-27A	5529.54	8976.36	8318.78	4656.61	5914.15	4190.44	NaN	1327.03	NaN
P51531	SMARCA2	Homo sapiens	Probable global transcription activator SNF2L2	2350.44	2711.33	1859.35	4517.72	3317.37	2115.05	2922.24	4001.42	2638.4
P51570	GALK1	Homo sapiens	Galactokinase	5201.84	5643.53	3915.32	7274.72	6397.82	7290.61	6077.58	4104.36	4886.35
P51572	BCAP31	Homo sapiens	B-cell receptor-associated protein 31	6713.24	7021.81	2462.93	4085.08	2364.08	3250.38	8245.07	5305.53	6918.43
P51606	RENBP	Homo sapiens	N-acylglucosamine 2-epimerase	10354.2	9039.09	10644.5	12621	11144.7	12999.5	10234	7609	10046.5
P51610	HCFC1	Homo sapiens	Host cell factor 1	842.093	785.693	2427.45	717.569	NaN	258.333	419.654	1984.39	1999.96
P51659	HSD17B4	Homo sapiens	Peroxisomal multifunctional enzyme type 2	3158.87	4046.6	2599.06	2590.31	1453.92	NaN	1399.52	4106.42	NaN
P51665	PSMD7	Homo sapiens	26S proteasome non-ATPase regulatory subunit 7	21592.8	24844.3	24547.1	18276.4	24138.2	23331.3	16787.1	14998.1	10690.7
P51798	CLCN7	Homo sapiens	H(+)/Cl(-) exchange transporter 7	NaN	585.978	451.078	292.305	483.814	NaN	2027.6	2582.1	2358.63
P51809	VAMP7	Homo sapiens	Vesicle-associated membrane protein 7	13307.3	12740.3	18282.2	16392.6	15523.7	15679.8	31416.4	27855.6	29670.3
P51812	RPS6KA3	Homo sapiens	Ribosomal protein S6 kinase alpha-3	2941.24	2334.35	1362.94	5236.21	2541.61	3913.58	2797.11	4316.08	3719.01
P51857	AKR1D1	Homo sapiens	Aldo-keto reductase family 1 member D1	1716.13	2268.06	2255.61	3050.18	3275.93	3099.61	4245.13	6270.83	5985.22
P51884	LUM	Homo sapiens	Lumican	23434.5	16653.7	20913.4	26877.5	27867.7	27287.5	14340.8	10388.2	8568.24
P51991	HNRNPA3	Homo sapiens	Heterogeneous nuclear ribonucleoprotein A3	1572.76	185.584	936.026	1466.25	2179.79	623.26	883.05	246.458	2056.55
P52209	PGD	Homo sapiens	6-phosphogluconate dehydrogenase, decarboxylating	65529.1	63183.8	61866.7	64609.8	53884.1	59737.4	72199.6	68119.3	80930.5
P52272	HNRNPM	Homo sapiens	Heterogeneous nuclear ribonucleoprotein M	6884.6	5959.85	6226.33	5264.75	5430.85	5158.05	6236.71	2001.37	6053.21
P52294	KPNA1	Homo sapiens	Importin subunit alpha-5	1199.55	1585.02	2191.86	558.098	539.474	632.986	1882.74	1280.02	2881.14
P52565	ARHGDIA	Homo sapiens	Rho GDP-dissociation inhibitor 1	11955.9	14078.3	13078.3	15110.8	12978.2	11776.1	17783.3	19141.4	15869.8
P52566	ARHGDIB	Homo sapiens	Rho GDP-dissociation inhibitor 2	6521.64	7186.46	6414.47	4491.64	3372.28	3168.96	4305.67	4909.45	5179.33
P52597	HNRNPF	Homo sapiens	Heterogeneous nuclear ribonucleoprotein F	12784.4	8960.07	6870.48	2585.02	2205.89	1855.61	5030.62	1812.05	2099.64
P52630	STAT2	Homo sapiens	Signal transducer and activator of transcription 2	291.32	945.705	1013.71	1113.61	NaN	883.31	6181.96	5676.77	7570.42
P52789	HK2	Homo sapiens	Hexokinase-2	5472.95	4676.17	6875.88	4339.22	5120.81	4711.02	3747.21	3772.99	5721.06
P52823	STC1	Homo sapiens	Stanniocalcin-1	1058.09	404.547	92.088	4989.39	3338.98	3280.67	NaN	NaN	396.971
P52888	THOP1	Homo sapiens	Thimet oligopeptidase	4478.5	4187.71	4264.98	3761.84	4751.67	2309.89	3870.13	4370.89	3921.77
P52895;Q04828	AKR1C2;AKR1C1	Homo sapiens	Aldo-keto reductase family 1 member C2;Aldo-keto reductase family 1 member C1	13511.1	8151.56	2449.46	639.941	3391.08	4185.66	9514.49	17292.8	12344
P52907	CAPZA1	Homo sapiens	F-actin-capping protein subunit alpha-1	14928.3	15026.9	15623.6	15237.1	12904.3	15654.8	16660.7	21582	22363.9
P52926	HMGA2	Homo sapiens	High mobility group protein HMGI-C	NaN	NaN	NaN	1788.83	1440.71	667.081	NaN	NaN	NaN
P53004	BLVRA	Homo sapiens	Biliverdin reductase A	9823.76	9889.3	8492.42	6650.35	6638.07	5119.44	8073.37	5398.62	7252.7
P53396	ACLY	Homo sapiens	ATP-citrate synthase	74561.9	67149.6	74468.5	68642.2	81614.1	76903.6	54475.9	56645.1	48744.2
P53618	COPB1	Homo sapiens	Coatomer subunit beta	6404.55	6462.11	7000.33	8749.7	6461.89	6112.17	8110.61	7912.9	8579.38
P53621	COPA	Homo sapiens	Coatomer subunit alpha	57301.3	59612	59807.8	64589	52041.7	56480.6	53392.8	48373.1	45288.1
P53634	CTSC	Homo sapiens	Dipeptidyl peptidase 1	2173.72	3246.94	1948.77	2955.64	2232.35	1262.56	911.328	1792.47	2323.73
P53990	IST1	Homo sapiens	IST1 homolog	2597.12	4171.7	4342.17	3885.57	3845.28	7326.27	5592.79	3501.27	2624.04
P53992	SEC24C	Homo sapiens	Protein transport protein Sec24C	7906.08	6538.32	7041.99	11518.9	9123.71	10747.4	6052.91	6054.83	7003.15
P54136	RARS1	Homo sapiens	Arginine--tRNA ligase, cytoplasmic	23665.9	22272.7	22513.3	20060.7	15555.2	17707	13426.6	15646.1	22633.9
P54289	CACNA2D1	Homo sapiens	Voltage-dependent calcium channel subunit alpha-2/delta-1	9872.14	10598.6	8478.6	13634.8	12653.1	13312	17908.2	17674.1	15817.6
P54577	YARS1	Homo sapiens	Tyrosine--tRNA ligase, cytoplasmic	6670.26	6034.43	5616.93	6665.01	5284.82	6460.54	4810.29	5356.38	6950.35
P54687	BCAT1	Homo sapiens	Branched-chain-amino-acid aminotransferase, cytosolic	8360.34	5496.58	7174.93	25669.9	13261.3	13196.9	8378.53	8018.45	11822
P54709	ATP1B3	Homo sapiens	Sodium/potassium-transporting ATPase subunit beta-3	4034.3	2873.57	2800.99	1231.6	2193.33	2162.03	1906.65	2030.54	1352.15
P54920	NAPA	Homo sapiens	Alpha-soluble NSF attachment protein	542.691	1039.17	898.672	22.3339	34.7787	30.7255	3459.19	455.434	4318.93
P55036	PSMD4	Homo sapiens	26S proteasome non-ATPase regulatory subunit 4	8488.4	11334.1	7288.01	12870.3	10637.9	14259.5	5248.76	5232.93	5092.43
P55058	PLTP	Homo sapiens	Phospholipid transfer protein	13384	14893.9	17704.5	9462.28	21801.4	16184.2	12082.3	4871.23	8213.65
P55060	CSE1L	Homo sapiens	Exportin-2	3264.3	3786.13	5127.52	2782.78	3290.67	2311.08	1273.82	4050.07	1260.33
P55072	VCP	Homo sapiens	Transitional endoplasmic reticulum ATPase	76508.4	77238.3	78053	111261	110087	110674	62028	54785.8	61786.9
P55084	HADHB	Homo sapiens	Trifunctional enzyme subunit beta, mitochondrial	2142.86	723.489	1241.13	1439.6	2746.53	NaN	6892.44	7826.23	7107.52
P55160	NCKAP1L	Homo sapiens	Nck-associated protein 1-like	19419.5	16234.5	16856.8	17419.2	15196.1	18734.8	14059.4	13822.2	22852.6
P55209	NAP1L1	Homo sapiens	Nucleosome assembly protein 1-like 1	11387.8	12414.3	11104.5	20791.8	13508.3	14457.6	17164	16763.1	19951.3
P55259	GP2	Homo sapiens	Pancreatic secretory granule membrane major glycoprotein GP2	4482.03	5113.18	4399.78	10494.2	9368.73	11138.8	7345.66	9854.59	5636.54
P55263	ADK	Homo sapiens	Adenosine kinase	7524.71	6922.05	7372.65	7689.64	8886.73	5293.16	8348.84	9323.37	7910.12
P55265	ADAR	Homo sapiens	Double-stranded RNA-specific adenosine deaminase	45700	18520.3	1450.34	10022.8	7302.6	7556.39	15033.7	17379.4	38.2591
P55285	CDH6	Homo sapiens	Cadherin-6	7353.3	6218.5	6775.44	8899.67	10873.3	9786.15	14513.2	12391.9	11117.4
P55290	CDH13	Homo sapiens	Cadherin-13	9030.82	9878.16	6607.53	13104.4	13399.3	12678.2	12335.8	12756.8	19538.7
P55786	NPEPPS	Homo sapiens	Puromycin-sensitive aminopeptidase	11920.5	9701.07	10479.7	11382.4	8278.69	9049.72	11299.4	10882.3	11522.8
P55884	EIF3B	Homo sapiens	Eukaryotic translation initiation factor 3 subunit B	3012.61	2754.52	2745.87	2293.06	4153.85	2220.39	4960.54	4130.61	3465.68
P56192	MARS1	Homo sapiens	Methionine--tRNA ligase, cytoplasmic	19806.8	20399.9	17779.6	13576.6	10314.3	10850.8	14791.7	15537.5	12919
P56377	AP1S2	Homo sapiens	AP-1 complex subunit sigma-2	1164.8	268.832	1997.61	1695.98	626.48	1636.91	1670.7	1565.53	1624.96
P56537	EIF6	Homo sapiens	Eukaryotic translation initiation factor 6	11970.3	13587.2	10596.6	10043.4	12174.4	9894.53	6060.07	4726.64	10395.1
P56545	CTBP2	Homo sapiens	C-terminal-binding protein 2	NaN	991.848	1181.97	311.63	1044.43	857.641	NaN	NaN	629.721
P57737	CORO7	Homo sapiens	Coronin-7	11088.6	12501.6	13045.9	7732.42	8094.61	7754.38	10183.8	11084.9	11016
P58335;Q9H6X2	ANTXR2;ANTXR1	Homo sapiens	Anthrax toxin receptor 2;Anthrax toxin receptor 1	15925.4	17326.9	17266.8	27969.2	30677.5	30638.8	70739	76745.5	69931.2
P58546	MTPN	Homo sapiens	Myotrophin	5478.79	7799.86	4687.27	6846.56	6166.28	3953.5	9082.99	7192.14	8298.7
P59998	ARPC4	Homo sapiens	Actin-related protein 2/3 complex subunit 4	48242	52975.8	52265.6	61512.6	49496.9	48707.5	23795.1	10982.6	20365.7
P60033	CD81	Homo sapiens	CD81 antigen	55283.3	105323	60713.9	125860	135759	75073.7	59411.6	43881.6	64584.7
P60174	TPI1	Homo sapiens	Triosephosphate isomerase	4548.13	2505.2	4459.9	9528.38	4194.4	8004.75	3578.08	3412.3	4926.74
P60228	EIF3E	Homo sapiens	Eukaryotic translation initiation factor 3 subunit E	14076	13835.5	13498.5	12342.2	13951.8	13448.6	10089.6	9757.76	10975.9
P60660	MYL6	Homo sapiens	Myosin light polypeptide 6	52047.5	53340.2	62668.2	57291.2	48712.2	50678.8	37363.9	35661.8	35534.9
P60709;P63261	ACTB;ACTG1	Homo sapiens	Actin, cytoplasmic 1;Actin, cytoplasmic 2	1.06616e+06	1.14032e+06	1.16695e+06	976949	1.30113e+06	1.09452e+06	1.26586e+06	1.23635e+06	1.28413e+06
P60842	EIF4A1	Homo sapiens	Eukaryotic initiation factor 4A-I	19665.4	22035.4	20249.7	17409.7	20960.4	19531.7	35090.4	41444.1	38100.9
P60866	RPS20	Homo sapiens	40S ribosomal protein S20	15243.2	14803.5	13167.3	14270.4	14278.7	13156.8	11121.5	9132.03	10719.7
P60891	PRPS1	Homo sapiens	Ribose-phosphate pyrophosphokinase 1	2815.65	4370.02	2956.13	1021.71	1229.44	1186.62	1772.37	2580.69	1925.31
P60900	PSMA6	Homo sapiens	Proteasome subunit alpha type-6	27229	23135	23687.7	26317.1	30682.7	28320.8	24882	21698.4	25111.4
P60953	CDC42	Homo sapiens	Cell division control protein 42 homolog	3976.63	3140.54	3676.38	4999.29	3016.9	2760.08	1161.87	1360.06	949.85
P60981	DSTN	Homo sapiens	Destrin	8401.04	6160.95	7177.98	9798	9651.22	10645.9	11885	10668.3	11413.3
P61006	RAB8A	Homo sapiens	Ras-related protein Rab-8A	593.208	2437.38	341.238	2244.1	927.015	1752.6	3438.57	1779.01	568.399
P61011	SRP54	Homo sapiens	Signal recognition particle 54 kDa protein	9835.57	8451.6	7334.73	5681.65	5213.5	4707.7	9884.12	9845.18	11113.1
P61019	RAB2A	Homo sapiens	Ras-related protein Rab-2A	10919.3	12245.4	9449.71	9432.3	10347.7	9552.73	17101.2	17069.6	18657.9
P61020	RAB5B	Homo sapiens	Ras-related protein Rab-5B	12788	13583.6	17209.2	19217.8	14857.9	15456.1	34886.2	37888.6	32512.8
P61073	CXCR4	Homo sapiens	C-X-C chemokine receptor type 4	1024.13	248.085	424.666	3311.02	2162.3	1930.58	1279.65	1336.17	591.307
P61088;Q5JXB2	UBE2N;UBE2NL	Homo sapiens	Ubiquitin-conjugating enzyme E2 N;Putative ubiquitin-conjugating enzyme E2 N-like	3590.46	3646.84	3688.85	2666.33	2363.26	4100.4	5080.02	3455.46	3721.69
P61106	RAB14	Homo sapiens	Ras-related protein Rab-14	33263.4	35888.1	33747.4	38815.5	32912	35143.2	80478.3	68113.7	85781.1
P61158	ACTR3	Homo sapiens	Actin-related protein 3	61032	60615.5	62653	70445	67738.7	71191.1	60480.9	68465.5	71517.1
P61160	ACTR2	Homo sapiens	Actin-related protein 2	8305.84	11712.3	12544.2	14173.9	18882	12993	7720.88	6594.81	7481.98
P61163	ACTR1A	Homo sapiens	Alpha-centractin	20150.3	16230.6	16969.9	33836	15279.7	18699.8	13657.6	14177.7	17353
P61201	COPS2	Homo sapiens	COP9 signalosome complex subunit 2	3940.31	2930.66	3563.96	3733.95	1088.2	2577.79	1680.42	874.1	403.424
P61204;P84077	ARF3;ARF1	Homo sapiens	ADP-ribosylation factor 3;ADP-ribosylation factor 1	35109.9	28186	28581	26450.8	15824.4	18616.2	16206.3	17814.6	8656.48
P61221	ABCE1	Homo sapiens	ATP-binding cassette sub-family E member 1	3060.59	2835.83	4282.84	3411.04	3598.77	2042.58	1633.18	2463.63	2622.89
P61224;P62834	RAP1B;RAP1A	Homo sapiens	Ras-related protein Rap-1b;Ras-related protein Rap-1A	7598.25	16472.7	16380.2	12728.4	6447.3	8108.17	53.3885	8755.43	7968.51
P61247	RPS3A	Homo sapiens	40S ribosomal protein S3a	5006.98	5297.2	4383.72	5729.48	6447.61	5869.06	5127.97	3132.27	3270.99
P61289	PSME3	Homo sapiens	Proteasome activator complex subunit 3	5549.34	4271.26	5523.56	2406.62	4305.84	3889.71	3030.51	2180.8	2157.39
P61313	RPL15	Homo sapiens	60S ribosomal protein L15	16192.1	15143.2	14532.4	11113.9	10721	9966.41	19606.9	16020.7	18432.3
P61353	RPL27	Homo sapiens	60S ribosomal protein L27	8536.12	13129.1	10941.3	8467.08	9086.29	10267.7	16123.2	17788	15476.9
P61421	ATP6V0D1	Homo sapiens	V-type proton ATPase subunit d 1	5559.14	9889.59	6682.65	8344.42	6772.95	7232.28	19926.2	14400.2	15060.8
P61513	RPL37A	Homo sapiens	60S ribosomal protein L37a	438.644	238.934	482.809	298.023	3139.14	4865.99	1368.35	1.11357	1760.83
P61586	RHOA	Homo sapiens	Transforming protein RhoA	11268	12408.5	12781.7	7998.17	7141.59	8715.61	12093.5	14792.7	13094
P61604	HSPE1	Homo sapiens	10 kDa heat shock protein, mitochondrial	2076.47	3309.94	3608.98	3800.43	5199.49	5501.51	644.268	353.243	0.996916
P61769	B2M	Homo sapiens	Beta-2-microglobulin	19959.4	13402.4	20735.5	20079.1	17548.9	18420.7	25362.4	20583	15532.8
P61978	HNRNPK	Homo sapiens	Heterogeneous nuclear ribonucleoprotein K	34304	36402.8	36624.3	31876.8	29801.8	31189.4	27598.1	25901.4	29300
P61981	YWHAG	Homo sapiens	14-3-3 protein gamma	18600.4	16224.1	16309.9	14550.5	15132.4	12426.2	23273.1	26404.5	25017.4
P62136	PPP1CA	Homo sapiens	Serine/threonine-protein phosphatase PP1-alpha catalytic subunit	20425.6	19338.7	19847.4	17932	21957.5	19559.8	21250.2	21374.3	24561.4
P62140	PPP1CB	Homo sapiens	Serine/threonine-protein phosphatase PP1-beta catalytic subunit	14616.3	23544.9	21918.2	29045.3	27486.3	19322.2	9931.56	8120.67	9691.82
P62191	PSMC1	Homo sapiens	26S proteasome regulatory subunit 4	41390.9	40898.8	42145.7	39209.5	35794.2	42434.7	37333	40930.4	40497.4
P62195	PSMC5	Homo sapiens	26S proteasome regulatory subunit 8	72858.1	68592.4	69685.3	75350.2	73397.3	64766.3	48638.4	56130.6	53067.7
P62241	RPS8	Homo sapiens	40S ribosomal protein S8	13784.7	14592.5	15192.5	14881.8	13594.5	13198.7	14979.1	14647.5	15279
P62244	RPS15A	Homo sapiens	40S ribosomal protein S15a	3529.65	754.908	3487.32	3227.82	2245.58	1100.77	NaN	664.351	2.23804
P62249	RPS16	Homo sapiens	40S ribosomal protein S16	19923.7	24234.2	22521.7	30280.7	25289.2	28844.9	10984.8	18392.5	13192.8
P62258	YWHAE	Homo sapiens	14-3-3 protein epsilon	10290.5	8738.29	10299.3	10319.2	11994.4	9726.76	14990.1	14580	17739.7
P62263	RPS14	Homo sapiens	40S ribosomal protein S14	3784.9	5336.83	5753.53	5852.85	6083.56	5462.67	5357.72	5899.49	5554.6
P62269	RPS18	Homo sapiens	40S ribosomal protein S18	40300.1	42335	36379	42547.4	38101.5	44050.5	19138.8	17343.2	9867.08
P62280	RPS11	Homo sapiens	40S ribosomal protein S11	8258.9	8631.13	8643.23	7378.45	9389.44	9189.7	8159.69	3128.28	6101.73
P62314	SNRPD1	Homo sapiens	Small nuclear ribonucleoprotein Sm D1	14470	18147.8	16789.3	7090.44	8693.58	8292.35	5095.45	3039.53	3449.88
P62316	SNRPD2	Homo sapiens	Small nuclear ribonucleoprotein Sm D2	5869.33	7080.2	7507.21	6288.38	6544.35	5893.8	10705.3	8564.68	8397.41
P62318	SNRPD3	Homo sapiens	Small nuclear ribonucleoprotein Sm D3	2510.71	1945.64	2962.82	1675.22	2614.48	2529.43	1673.09	3441.56	1119.87
P62328	TMSB4X	Homo sapiens	Thymosin beta-4	18565.5	21081.6	20203.1	15939.7	16306.5	17226.1	16438.8	17628.1	17502.7
P62333	PSMC6	Homo sapiens	26S proteasome regulatory subunit 10B	18448.4	16320.6	17596	15674.2	24382.6	17262.3	17802.7	17486	20657.4
P62424	RPL7A	Homo sapiens	60S ribosomal protein L7a	18168.2	16173.9	16560.2	15821.1	13927.2	14167.8	14372.1	18542.2	18607.7
P62491;Q15907	RAB11A;RAB11B	Homo sapiens	Ras-related protein Rab-11A;Ras-related protein Rab-11B	40586.8	45894.5	37036	33421.6	35517.8	33761.2	48693.6	52277.7	52408.3
P62495	ETF1	Homo sapiens	Eukaryotic peptide chain release factor subunit 1	1.21066	NaN	4.41364	NaN	0.760865	NaN	3.10242	0.00612132	NaN
P62699	YPEL5	Homo sapiens	Protein yippee-like 5	3376.37	2912.43	2927.09	1079.84	2282.38	4026.12	1976.56	1292.36	1429.33
P62701	RPS4X	Homo sapiens	40S ribosomal protein S4, X isoform	28181.5	26422.9	26906.2	29149.8	25767.1	21268.6	27541.3	23818.8	25149.8
P62753	RPS6	Homo sapiens	40S ribosomal protein S6	10109.4	10246.8	11799.9	4100.8	7092.23	5851.64	8546.54	7262.7	11860.2
P62805	H4C1	Homo sapiens	Histone H4	62260	69499.4	76101.1	88986	77788.9	80961.3	48009.9	49552.3	49558.6
P62820	RAB1A	Homo sapiens	Ras-related protein Rab-1A	25733.7	25789.1	24133.3	19437.3	15589.5	10468.2	13179.2	16149.6	10737.9
P62826	RAN	Homo sapiens	GTP-binding nuclear protein Ran	121583	98462.3	113813	95960.9	67378.6	82864.7	115419	90546.7	103513
P62829	RPL23	Homo sapiens	60S ribosomal protein L23	10487.7	11656.7	12281.5	12354.1	7394.73	10080.4	4668.86	2294.44	3470.51
P62873	GNB1	Homo sapiens	Guanine nucleotide-binding protein G(I)/G(S)/G(T) subunit beta-1	3612.45	6916.65	4535.69	8166.45	6835.29	4634.21	568.216	2000.94	1714.34
P62879	GNB2	Homo sapiens	Guanine nucleotide-binding protein G(I)/G(S)/G(T) subunit beta-2	27456.2	33782.9	31690.1	30898.9	32966.1	30879.4	27424.9	19926.3	20439.7
P62888	RPL30	Homo sapiens	60S ribosomal protein L30	27483.7	26179	24639	18528.8	20815	16224.7	7355.27	10010.3	5206.54
P62906	RPL10A	Homo sapiens	60S ribosomal protein L10a	35453.5	34852.4	29022.5	19750.4	15504	16585.4	17631.9	19933.8	22150.4
P62913	RPL11	Homo sapiens	60S ribosomal protein L11	40308.2	39669.3	35797.6	28915.4	25933.5	35017.2	30311.9	32364.4	30794
P62917	RPL8	Homo sapiens	60S ribosomal protein L8	NaN	0.549997	NaN	0.440117	195.821	679.057	1973.39	2428.03	2604.43
P62937	PPIA	Homo sapiens	Peptidyl-prolyl cis-trans isomerase A	7034.35	8314.17	8796.94	6136.58	6289.21	5640.86	8396.23	9899.55	10971
P62942	FKBP1A	Homo sapiens	Peptidyl-prolyl cis-trans isomerase FKBP1A	4403.64	3995.35	5117.34	2733.74	3962.05	3927.16	4633.63	4267.2	2632.54
P62993	GRB2	Homo sapiens	Growth factor receptor-bound protein 2	9234.92	12118.3	11181.5	30614.6	25268.1	27526.5	16579.7	3991.54	11807.8
P62995	TRA2B	Homo sapiens	Transformer-2 protein homolog beta	2262.8	3107.67	3924.36	2889.21	2024.31	1984.92	5795	3661.31	6424.63
P63010	AP2B1	Homo sapiens	AP-2 complex subunit beta	1358.93	NaN	1257.06	1304.22	492.168	325.412	1430.45	1924.85	325.093
P63027	VAMP2	Homo sapiens	Vesicle-associated membrane protein 2	5499.71	4499.94	5297.28	5603.06	5963.46	6028.45	7318.75	6361.33	6197.16
P63092;Q5JWF2	GNAS	Homo sapiens	Guanine nucleotide-binding protein G(s) subunit alpha isoforms short;Guanine nucleotide-binding protein G(s) subunit alpha isoforms XLas	2240	4313.04	4017.5	4892.44	5016.15	4221.2	6709.41	6460.18	7298.71
P63104	YWHAZ	Homo sapiens	14-3-3 protein zeta/delta	21070.6	22745.5	27286.3	15136.2	17676.8	12117	25075.7	34591.6	26056.7
P63151	PPP2R2A	Homo sapiens	Serine/threonine-protein phosphatase 2A 55 kDa regulatory subunit B alpha isoform	14595.6	18043.7	17315.4	15528.7	14393.2	13383.8	18318.2	15983.6	18463.4
P63167	DYNLL1	Homo sapiens	Dynein light chain 1, cytoplasmic	2251.84	3330.5	2746.52	3965.01	3159.81	345.812	585.108	26.0826	372.245
P63218	GNG5	Homo sapiens	Guanine nucleotide-binding protein G(I)/G(S)/G(O) subunit gamma-5	2629.8	1537.78	1727	5742.62	4703.83	3995.47	3819.67	7479.31	3190.98
P63244	RACK1	Homo sapiens	Receptor of activated protein C kinase 1	336240	386649	404984	349497	293966	323821	249335	258234	255933
P67775	PPP2CA	Homo sapiens	Serine/threonine-protein phosphatase 2A catalytic subunit alpha isoform	7459.76	10707.8	10065.4	6453.96	7829.5	10947.6	8127.02	8318.55	8952.88
P67936	TPM4	Homo sapiens	Tropomyosin alpha-4 chain	19814.3	21097.6	21585.8	23520.3	25880.9	28158.1	12057.6	14916.5	19024
P68032;P68133	ACTC1;ACTA1	Homo sapiens	Actin, alpha cardiac muscle 1;Actin, alpha skeletal muscle	1.59845e+06	1.57776e+06	1.47324e+06	1530309	1.394e+06	1.61314e+06	2.04152e+06	2.02732e+06	1.61767e+06
P68104;Q5VTE0	EEF1A1;EEF1A1P5	Homo sapiens	Elongation factor 1-alpha 1;Putative elongation factor 1-alpha-like 3	459993	452799	464624	502654	472331	495990	384201	344637	405330
P68363	TUBA1B	Homo sapiens	Tubulin alpha-1B chain	468414	457934	452074	496314	417053	446276	478146	435219	458800
P68366	TUBA4A	Homo sapiens	Tubulin alpha-4A chain	72929.8	58869.2	63419.6	58371.1	51242.5	53487.5	35791	47392.4	40505.1
P68371	TUBB4B	Homo sapiens	Tubulin beta-4B chain	118668	119022	122074	95612.1	123466	108904	92663.6	80805.1	80717.2
P68400;Q8NEV1	CSNK2A1;CSNK2A3	Homo sapiens	Casein kinase II subunit alpha;Casein kinase II subunit alpha 3	2940.45	1714.92	981.686	105.115	1209.85	279.829	1347.97	405.183	1695.61
P68431;P84243;Q16695;Q71DI3	H3C1;H3-3A;H3-4;H3C15	Homo sapiens	Histone H3.1;Histone H3.3;Histone H3.1t;Histone H3.2	12485	9928.61	11960.5	7664.31	6291.42	8052.88	1389.32	12356	13898.4
P69905	HBA1	Homo sapiens	Hemoglobin subunit alpha	141510	141459	116743	151762	137867	141831	131909	106923	139920
P78344	EIF4G2	Homo sapiens	Eukaryotic translation initiation factor 4 gamma 2	2105.19	2957.39	1370.65	597.927	2300.85	2200	2281.87	2810.93	996.319
P78347	GTF2I	Homo sapiens	General transcription factor II-I	2842.89	2664.06	2267.01	2818.34	1708.68	2013.24	1838.81	1457.68	2200.23
P78371	CCT2	Homo sapiens	T-complex protein 1 subunit beta	181175	178888	174472	175651	208752	189809	169687	170128	164437
P78417	GSTO1	Homo sapiens	Glutathione S-transferase omega-1	12028.9	11609	10947.1	5656.71	4597.32	6949.88	6904.72	3020.73	4493.28
P78527	PRKDC	Homo sapiens	DNA-dependent protein kinase catalytic subunit	23446.6	22026.6	22186.9	30901.1	27553.1	28518.8	35260	33243	37266.6
P78536	ADAM17	Homo sapiens	Disintegrin and metalloproteinase domain-containing protein 17	6937.66	7672.24	5629.61	8472.46	7953.61	6117.54	7088.61	9538	9689.75
P80723	BASP1	Homo sapiens	Brain acid soluble protein 1	20530.1	25170.6	25651.7	43224.5	34564.1	42324.1	37043.9	35128.3	35957.1
P81605	DCD	Homo sapiens	Dermcidin	14140.7	4764.97	5174.52	14605.3	5857.18	6475.6	4192.97	4544.5	16522.7
P83436	COG7	Homo sapiens	Conserved oligomeric Golgi complex subunit 7	1246.16	2318.76	1068.43	1.11504	684.802	792.547	1461.62	2249.94	1703.25
P83731	RPL24	Homo sapiens	60S ribosomal protein L24	3814.13	3198.01	4657.86	10238.7	6787.13	6715.84	2340.58	3549.45	3776.37
P84085	ARF5	Homo sapiens	ADP-ribosylation factor 5	36147.4	42215.7	54338.1	31087.3	20601.8	29511.9	21209.6	19794.7	19913.6
P84090	ERH	Homo sapiens	Enhancer of rudimentary homolog	5467.84	6008.23	6220.25	5711.03	5159.01	3754.28	5240.52	2119.33	5671.6
P84095	RHOG	Homo sapiens	Rho-related GTP-binding protein RhoG	2236.89	2027.9	2465.96	2672.9	2750.86	2097.27	4754.78	3723.5	4598.29
P84103	SRSF3	Homo sapiens	Serine/arginine-rich splicing factor 3	47881.8	43355.7	46941.2	88057.1	46469.4	54218.2	86393.6	81118.6	130649
P98082	DAB2	Homo sapiens	Disabled homolog 2	1.01039	805.84	943.82	831.505	251.285	578.336	NaN	NaN	NaN
P98160	HSPG2	Homo sapiens	Basement membrane-specific heparan sulfate proteoglycan core protein	2974.82	1557.81	3091.3	14572.6	10345.3	12372.6	4789.09	3414.05	4915.06
P98194	ATP2C1	Homo sapiens	Calcium-transporting ATPase type 2C member 1	2723.72	2415.72	816.806	2623.49	1580.23	1656.58	888.487	2177.72	1829.71
Q00266	MAT1A	Homo sapiens	S-adenosylmethionine synthase isoform type-1	5220.91	5719.98	6256.42	5569.06	6829.72	6707.47	8174.25	9397.05	10403.4
Q00534	CDK6	Homo sapiens	Cyclin-dependent kinase 6	1437.38	2328.86	2354.47	2210.38	1531.14	3463.09	NaN	1329.27	64.8766
Q00577	PURA	Homo sapiens	Transcriptional activator protein Pur-alpha	7341.31	4244.42	5183	1756.26	3112.99	1970.62	6663.06	6089.17	5400.02
Q00610	CLTC	Homo sapiens	Clathrin heavy chain 1	201844	205825	207573	157790	150120	156813	108231	112287	103438
Q00839	HNRNPU	Homo sapiens	Heterogeneous nuclear ribonucleoprotein U	38495.9	39138.9	40786.5	41165	44474.2	42345.7	46117.3	47474.5	48075.5
Q01130	SRSF2	Homo sapiens	Serine/arginine-rich splicing factor 2	2721.06	2300.77	3698.63	2269.34	3115.01	3648.37	3209.89	3379.05	2107.58
Q01432	AMPD3	Homo sapiens	AMP deaminase 3	6145.84	6446.56	5643.56	6152.23	5877.58	5041.72	4235.78	3443.66	4902.75
Q01433	AMPD2	Homo sapiens	AMP deaminase 2	8538.34	10070.1	8500.41	4593.19	6100.03	4687.98	2269.13	3129.07	3800.64
Q01469	FABP5	Homo sapiens	Fatty acid-binding protein 5	18455.4	13739	13333.2	15249.5	13246.8	17029.1	33134.7	34768.2	24372.9
Q01518	CAP1	Homo sapiens	Adenylyl cyclase-associated protein 1	220331	207650	241144	335177	347002	353063	394053	384386	387010
Q01628	IFITM3	Homo sapiens	Interferon-induced transmembrane protein 3	323.308	862.414	931.899	272.195	287.946	354.064	3643.23	3352.78	5551.69
Q01650	SLC7A5	Homo sapiens	Large neutral amino acids transporter small subunit 1	6370.48	4854.96	6468.15	8570.41	8268.32	4548.21	8467.38	9595.7	11702.3
Q01813	PFKP	Homo sapiens	ATP-dependent 6-phosphofructokinase, platelet type	24320.7	23806.7	22791.2	26046.5	17183.7	17359.8	20372.3	19559.5	13887.1
Q02223	TNFRSF17	Homo sapiens	Tumor necrosis factor receptor superfamily member 17	2134.56	1113.65	2501.09	6652.32	3242.44	6642.73	2034.65	NaN	NaN
Q02297	NRG1	Homo sapiens	Pro-neuregulin-1, membrane-bound isoform	NaN	NaN	NaN	2169.55	3134.27	3528.56	NaN	NaN	1.1612
Q02413	DSG1	Homo sapiens	Desmoglein-1	8222.52	2044.73	1509.79	3023.48	1842.03	1759.72	13088.1	3577.06	1434.05
Q02543	RPL18A	Homo sapiens	60S ribosomal protein L18a	7022.44	7345.55	8046.71	8998.07	6971.02	7744.36	7896.64	9272.58	8420.4
Q02790	FKBP4	Homo sapiens	Peptidyl-prolyl cis-trans isomerase FKBP4	2746.09	3327.54	3029.5	2025.8	3381.7	1571.46	2800.42	1924.19	2911.54
Q02809	PLOD1	Homo sapiens	Procollagen-lysine,2-oxoglutarate 5-dioxygenase 1	4224.47	4776.66	4899.86	9225.73	11221.5	8485.62	11445.3	10276.6	10126.7
Q02878	RPL6	Homo sapiens	60S ribosomal protein L6	1382.19	1902.7	336.11	1.43696	849.57	425.139	1.21236	1911.54	550.695
Q02880	TOP2B	Homo sapiens	DNA topoisomerase 2-beta	5126.11	5300.98	4838.53	2318.73	1200.79	316.066	697.173	NaN	NaN
Q03169	TNFAIP2	Homo sapiens	Tumor necrosis factor alpha-induced protein 2	990.256	776.725	1138.51	530.823	979.002	986.468	1271.99	1383.08	962.273
Q03181	PPARD	Homo sapiens	Peroxisome proliferator-activated receptor delta	38431.2	35677.8	32789.3	38664.9	31100.7	35370.9	67578.7	71680.8	66840.6
Q03405	PLAUR	Homo sapiens	Urokinase plasminogen activator surface receptor	12901.6	13989	12614.6	9940.12	14450.5	11049.9	10416.1	10182.4	12498.8
Q03692	COL10A1	Homo sapiens	Collagen alpha-1(X) chain	1508.1	2004.87	2629.22	7433.27	2488.6	4429.43	635.948	638.256	261.978
Q04637	EIF4G1	Homo sapiens	Eukaryotic translation initiation factor 4 gamma 1	21737.2	14672.9	16273.6	17819.6	12175.3	13059.8	15983.7	14397.9	14223.4
Q04695	KRT17	Homo sapiens	Keratin, type I cytoskeletal 17	53800.5	2553.38	1612.86	10600.2	3570.91	2726.57	20260.8	5084.16	2874.62
Q04724	TLE1	Homo sapiens	Transducin-like enhancer protein 1	7396.6	5546.41	6732.84	166.119	2519.19	3182.57	4413.44	3920.35	10.7498
Q04756	HGFAC	Homo sapiens	Hepatocyte growth factor activator	13769.7	12612.2	14179.1	17687.3	17271.8	18183	19385.7	21238.1	21146.5
Q04760	GLO1	Homo sapiens	Lactoylglutathione lyase	6679.99	5638.39	5485.03	7221.12	4493.49	4467.19	4850.92	5015.48	7526.64
Q04917	YWHAH	Homo sapiens	14-3-3 protein eta	4932.69	3405.9	4712.35	4010.09	3217.99	3987.98	7921.02	6613.16	5497.55
Q04941	PLP2	Homo sapiens	Proteolipid protein 2	26423.5	27800.9	27664.1	15542.3	22716.8	20836.1	16399.4	19103.6	16403.9
Q05048	CSTF1	Homo sapiens	Cleavage stimulation factor subunit 1	2700.33	2351.5	3341.51	335.143	1212.64	1189.08	2754.85	393.187	978.276
Q05086	UBE3A	Homo sapiens	Ubiquitin-protein ligase E3A	1821.44	1966.1	1833.28	1174.78	741.473	1099.88	1087.35	NaN	1559.21
Q05209	PTPN12	Homo sapiens	Tyrosine-protein phosphatase non-receptor type 12	753.092	2807.26	1434.64	1327.72	2475.02	1482.06	2173.4	3823.31	3157.8
Q05519	SRSF11	Homo sapiens	Serine/arginine-rich splicing factor 11	NaN	390.287	541.781	0.877382	154.695	NaN	498.159	321.98	780.4
Q05639	EEF1A2	Homo sapiens	Elongation factor 1-alpha 2	35420.3	51036	37869	602.08	63007.3	3320.34	36174.3	37365.8	202.121
Q05655	PRKCD	Homo sapiens	Protein kinase C delta type	95.7357	447.823	242.494	NaN	147.425	NaN	735.86	824.86	998.795
Q06033	ITIH3	Homo sapiens	Inter-alpha-trypsin inhibitor heavy chain H3	22472.5	21718.7	35421.1	25850.2	23526.4	26717.6	35484.3	26750.2	10515.1
Q06210	GFPT1	Homo sapiens	Glutamine--fructose-6-phosphate aminotransferase [isomerizing] 1	20231.5	19325.3	19460.5	20477.5	24554.6	21363.4	26717.2	26654.1	29240.1
Q06323	PSME1	Homo sapiens	Proteasome activator complex subunit 1	2323.17	3249.36	1991	1904.01	2245.25	1688.34	1931.51	1387.19	1554
Q06830	PRDX1	Homo sapiens	Peroxiredoxin-1	75646.6	71294.4	78206.2	88062.1	96468.4	100951	49108.9	47844.7	38766.7
Q07020	RPL18	Homo sapiens	60S ribosomal protein L18	21944.2	25065	28763.4	24724.3	16462.2	17870.4	8574.06	26944.7	27305.6
Q07866	KLC1	Homo sapiens	Kinesin light chain 1	1364.04	2605.7	3296.1	7313.23	3031.28	3711.52	2622.05	2779.62	2924.28
Q07954	LRP1	Homo sapiens	Prolow-density lipoprotein receptor-related protein 1	10767	13769	11665.1	15502.7	15271.2	16934.6	14538.3	17808.3	13477.9
Q07955	SRSF1	Homo sapiens	Serine/arginine-rich splicing factor 1	7886.34	9036.46	8302.81	4106.59	5147.31	8569.2	16102	10915.2	10925.8
Q08211	DHX9	Homo sapiens	ATP-dependent RNA helicase A	63980.6	64466.8	66633.8	58104.8	43517.7	44011.7	55305.2	41106.3	52519.7
Q08357	SLC20A2	Homo sapiens	Sodium-dependent phosphate transporter 2	949.906	1962.84	982.862	3111.85	3677.81	2935.95	2868.14	4747.44	4052.89
Q08380	LGALS3BP	Homo sapiens	Galectin-3-binding protein	2521.04	2699.15	3306.71	19975.7	18974.9	19334.9	18700.1	20724.8	25836
Q08431	MFGE8	Homo sapiens	Lactadherin	4728.59	3161.14	1758.77	2139.88	3306.95	5393.14	NaN	NaN	NaN
Q08722	CD47	Homo sapiens	Leukocyte surface antigen CD47	4956.25	6225.94	5163.53	7419.17	6518.83	8791.31	14100.7	15464.9	14238
Q08AM6	VAC14	Homo sapiens	Protein VAC14 homolog	14490.6	14255	11070.7	12819.2	12459.9	9413.88	12038.9	10552.6	10638.6
Q08J23	NSUN2	Homo sapiens	RNA cytosine C(5)-methyltransferase NSUN2	3977.42	4165.64	3798.12	6815.89	5777.52	6079.98	8641.16	6963.93	9765.45
Q09028	RBBP4	Homo sapiens	Histone-binding protein RBBP4	6319.44	7537.03	6727.86	6717.52	5668.75	6383.47	6295.47	8892.04	7436.19
Q09666	AHNAK	Homo sapiens	Neuroblast differentiation-associated protein AHNAK	32848.7	27305.6	35647.1	23275.3	22610.6	20913.5	21623.6	27011	24896.3
Q0VGL1	LAMTOR4	Homo sapiens	Ragulator complex protein LAMTOR4	9696.12	8291.31	7833.48	10717.8	9806	10425.8	16984.6	17397.9	15771
Q10567	AP1B1	Homo sapiens	AP-1 complex subunit beta-1	5002.79	3524.33	4328.91	3403.75	3985.09	3990.57	6403	7198.1	8094.7
Q10570	CPSF1	Homo sapiens	Cleavage and polyadenylation specificity factor subunit 1	374.766	422.956	709.333	NaN	NaN	NaN	69.037	0.200445	NaN
Q10589	BST2	Homo sapiens	Bone marrow stromal antigen 2	8667.03	9042.19	6337.76	12453.2	9634.11	7987.64	22663	14969.8	16112.6
Q12768	WASHC5	Homo sapiens	WASH complex subunit 5	3034.32	1372.02	2914.37	1254.25	3536.74	4033.56	8676.19	4992.08	5972.37
Q12769	NUP160	Homo sapiens	Nuclear pore complex protein Nup160	NaN	314.863	NaN	1930.04	1383.04	1442.39	2671.91	3013.55	2141.45
Q12805	EFEMP1	Homo sapiens	EGF-containing fibulin-like extracellular matrix protein 1	3436.77	4541.37	4682.14	7643.68	6021.72	5870.58	1987.43	1585.15	3684.53
Q12860	CNTN1	Homo sapiens	Contactin-1	9960.47	9310.47	6971.4	16069.6	11027.7	10286.2	12707.9	9913.48	9113.86
Q12874	SF3A3	Homo sapiens	Splicing factor 3A subunit 3	0.99231	172.406	NaN	0.874915	200.531	NaN	0.933836	1.39174	1.24181
Q12882	DPYD	Homo sapiens	Dihydropyrimidine dehydrogenase [NADP(+)]	2564.61	6219.24	6698.91	5133.88	2625.29	6345.88	3939.03	2371.08	5038
Q12884	FAP	Homo sapiens	Prolyl endopeptidase FAP	555.038	1402.25	2621.38	3669.04	3811.57	2972.09	3364.63	2632.5	2380.04
Q12888	TP53BP1	Homo sapiens	TP53-binding protein 1	1267.13	2436.48	1430.56	1051.01	759.597	4289.88	2831.54	1855.1	1181.09
Q12893	TMEM115	Homo sapiens	Transmembrane protein 115	3732.77	3860.24	3816.52	2980.95	2313.66	3083.15	11041.2	14395.5	16198
Q12904	AIMP1	Homo sapiens	Aminoacyl tRNA synthase complex-interacting multifunctional protein 1	11836.6	11607	12983.6	9344.46	9686.98	10398.2	17027.1	14286.1	16532.5
Q12905	ILF2	Homo sapiens	Interleukin enhancer-binding factor 2	11978.9	11527.8	12216.4	13049.2	8256.03	9391.43	7393.76	9171.35	13694.6
Q12907	LMAN2	Homo sapiens	Vesicular integral-membrane protein VIP36	5975.85	5846.45	3625.53	2849.77	4041.66	3856.26	6998.17	5616.67	5294.78
Q12913	PTPRJ	Homo sapiens	Receptor-type tyrosine-protein phosphatase eta	5719.58	5895.61	5010.52	13124.9	11856.6	10718.2	14026	15873.3	15845.5
Q12931	TRAP1	Homo sapiens	Heat shock protein 75 kDa, mitochondrial	396439	303839	315504	375811	322240	332977	315111	323171	277794
Q12965	MYO1E	Homo sapiens	Unconventional myosin-Ie	5258.93	4577.23	5000.51	4398.33	2475.37	4643.47	8146.36	5982.48	4662.71
Q13011	ECH1	Homo sapiens	Delta(3,5)-Delta(2,4)-dienoyl-CoA isomerase, mitochondrial	4352.18	4848.06	12018.1	8759.34	4287.58	8599.96	28149.4	5164.99	11097.9
Q13045	FLII	Homo sapiens	Protein flightless-1 homolog	3833.23	3717.38	3435.6	1863.36	2268.99	2586.05	2333.63	2177.12	2093.11
Q13098	GPS1	Homo sapiens	COP9 signalosome complex subunit 1	5430.93	5268.53	4917.88	3849.33	4381.59	3052.89	3675.34	3318.91	5901.32
Q13126	MTAP	Homo sapiens	S-methyl-5'-thioadenosine phosphorylase	8195.89	9472.1	7618.91	14295.3	10737.8	9477.76	16337.8	13899	21450.8
Q13131	PRKAA1	Homo sapiens	5'-AMP-activated protein kinase catalytic subunit alpha-1	2509.7	4287.89	2413.71	3159.4	3960.24	3308.82	3795.88	2253.74	2622.37
Q13144	EIF2B5	Homo sapiens	Translation initiation factor eIF-2B subunit epsilon	16947.5	20346.7	16314.9	6725.52	19049	4474.92	513.25	4469.19	4104.48
Q13148	TARDBP	Homo sapiens	TAR DNA-binding protein 43	2016.56	2731.42	2376.35	2771.87	3822.1	3646.36	1436.9	1887.71	1318.77
Q13151	HNRNPA0	Homo sapiens	Heterogeneous nuclear ribonucleoprotein A0	910.926	1124.57	1700.3	1.22071	NaN	915.345	1435.26	2097.47	NaN
Q13155	AIMP2	Homo sapiens	Aminoacyl tRNA synthase complex-interacting multifunctional protein 2	48791.3	38508.5	40917.3	42500.6	36130.9	37177.8	33793.1	28673.9	25484
Q13162	PRDX4	Homo sapiens	Peroxiredoxin-4	2369.01	2437.77	1969.47	3707.41	3384.74	5446.86	NaN	NaN	NaN
Q13177	PAK2	Homo sapiens	Serine/threonine-protein kinase PAK 2	1.44556	1238.92	1905.08	1.54217	1321.68	816.203	2052.03	721.954	347.402
Q13185	CBX3	Homo sapiens	Chromobox protein homolog 3	1003.52	897.231	NaN	1.04906	1331.47	439.95	1.34866	1.1369	1.23942
Q13200	PSMD2	Homo sapiens	26S proteasome non-ATPase regulatory subunit 2	38938.7	38678.3	38764.3	35742.4	31489.5	31495.8	31478.1	31499.6	31392.1
Q13263	TRIM28	Homo sapiens	Transcription intermediary factor 1-beta	24230.4	27471.6	25343.9	20834.7	23222.9	16551.4	15162.4	24531.4	26117
Q13303	KCNAB2	Homo sapiens	Voltage-gated potassium channel subunit beta-2	4464.52	4911.42	6656.98	6008.52	5221.11	2802.4	2976.09	2237.32	3716.33
Q13310	PABPC4	Homo sapiens	Polyadenylate-binding protein 4	12415.3	11212	11013.6	11355.5	13401.9	12622.6	18901.9	19838.9	17836.2
Q13332	PTPRS	Homo sapiens	Receptor-type tyrosine-protein phosphatase S	1934.67	1631.27	3418.05	2813.21	2563.22	2589.4	2334.64	1807.7	2248.23
Q13347	EIF3I	Homo sapiens	Eukaryotic translation initiation factor 3 subunit I	16087	16482.8	16965.1	17540.9	14901.6	15375	12628.3	8561.02	10980.4
Q13362;Q14738	PPP2R5C;PPP2R5D	Homo sapiens	Serine/threonine-protein phosphatase 2A 56 kDa regulatory subunit gamma isoform;Serine/threonine-protein phosphatase 2A 56 kDa regulatory subunit delta isoform	2808.7	1518.85	1789.64	760.458	NaN	920.907	1562.04	NaN	1.13621
Q13409	DYNC1I2	Homo sapiens	Cytoplasmic dynein 1 intermediate chain 2	7957.12	16341.2	6965.48	5090.43	4238.32	6363.1	3254.85	2932.05	2028.73
Q13418	ILK	Homo sapiens	Integrin-linked protein kinase	1394.85	1531.82	3128.19	1503.73	1081.26	1508.4	996.601	1690.07	1630.49
Q13443	ADAM9	Homo sapiens	Disintegrin and metalloproteinase domain-containing protein 9	2182.71	1191.99	7178.21	4443.61	3180.26	1487.98	1871.06	806.246	1651.26
Q13472	TOP3A	Homo sapiens	DNA topoisomerase 3-alpha	5427.7	4642.47	5657.07	5675.09	11513.7	6395.69	12971.4	17945.6	4156.02
Q13488	TCIRG1	Homo sapiens	V-type proton ATPase 116 kDa subunit a 3	1122.55	1199.97	1271.39	1830.02	2215.19	1376.21	4038.42	4369.7	3003.05
Q13501	SQSTM1	Homo sapiens	Sequestosome-1	20169	21660.7	19874.8	12710.5	11533	11093.3	49035.7	54143.4	53275.2
Q13509	TUBB3	Homo sapiens	Tubulin beta-3 chain	15985.9	14428.8	16734	13643.5	17757.3	15488.9	5956.88	6343.8	8061.8
Q13530	SERINC3	Homo sapiens	Serine incorporator 3	4508.38	3740.57	4804.64	7686.91	7244.32	7821.57	8468.97	10264.6	6590.85
Q13547	HDAC1	Homo sapiens	Histone deacetylase 1	2707.91	1879.53	1367.48	1713.92	1597.7	2981.94	436.326	7.72125	3.46701
Q13557	CAMK2D	Homo sapiens	Calcium/calmodulin-dependent protein kinase type II subunit delta	7330.97	3958.9	4572.6	4526.11	3721.48	6762.03	15408.9	13668.1	14400.2
Q13571	LAPTM5	Homo sapiens	Lysosomal-associated transmembrane protein 5	26745	24781.9	25634.2	56231.8	51913.8	53383.5	98785.2	83273	130662
Q13574	DGKZ	Homo sapiens	Diacylglycerol kinase zeta	1278.42	1233.41	627.112	NaN	NaN	NaN	5035.52	3962.72	5248.09
Q13595	TRA2A	Homo sapiens	Transformer-2 protein homolog alpha	3498.49	3308.95	2500.67	2368.7	4634.08	4568.13	5511.61	6156.67	5975.91
Q13608	PEX6	Homo sapiens	Peroxisome assembly factor 2	627.445	252.246	100.628	1.23214	83.3187	1307.88	NaN	652.681	278.841
Q13619	CUL4A	Homo sapiens	Cullin-4A	983.565	1990.56	1344.1	1119.88	710.964	1185.27	1802.48	1415.04	1519.9
Q13620	CUL4B	Homo sapiens	Cullin-4B	1365.34	1907.65	1375.9	NaN	2009.43	2894.84	1852.63	2119.77	1798.26
Q13630	GFUS	Homo sapiens	GDP-L-fucose synthase	1837.14	3508.59	2381.4	1508.94	NaN	1497.28	NaN	NaN	NaN
Q13642	FHL1	Homo sapiens	Four and a half LIM domains protein 1	4420.34	1241.17	1294.66	1664.83	1981.23	1366.46	14.999	1473.25	6.62614
Q13685	AAMP	Homo sapiens	Angio-associated migratory cell protein	44819.2	62298.8	32473.2	89241.4	27083	69505.9	93441.8	90321.6	112118
Q13740	ALCAM	Homo sapiens	CD166 antigen	192.412	NaN	NaN	1	NaN	NaN	NaN	0.58551	NaN
Q13794	PMAIP1	Homo sapiens	Phorbol-12-myristate-13-acetate-induced protein 1	4736.08	6029.72	2125.67	3343.89	4240.75	3926.23	4.14915	2576.82	3.49519
Q13813	SPTAN1	Homo sapiens	Spectrin alpha chain, non-erythrocytic 1	10112	14530.1	13218.8	26433	24506.7	31326.9	9890.01	10655.7	3970.65
Q13867	BLMH	Homo sapiens	Bleomycin hydrolase	9446.74	5956.5	3287.72	2745.7	1514.27	1712.81	22.1343	1051.08	2668.16
Q13884	SNTB1	Homo sapiens	Beta-1-syntrophin	10975.2	12585.3	12275.6	15493.1	14956.9	17490.7	13456.4	10560.6	11512.2
Q13885;Q9BVA1	TUBB2A;TUBB2B	Homo sapiens	Tubulin beta-2A chain;Tubulin beta-2B chain	2540.11	3245.97	3862.03	NaN	NaN	981.089	NaN	612.765	NaN
Q14008	CKAP5	Homo sapiens	Cytoskeleton-associated protein 5	3468.68	2869.4	3031.51	693.527	608.826	418.582	1.29581	NaN	NaN
Q14012	CAMK1	Homo sapiens	Calcium/calmodulin-dependent protein kinase type 1	1336.09	1317.7	2134.21	1824.66	1079.66	174.521	1381.3	NaN	NaN
Q14103	HNRNPD	Homo sapiens	Heterogeneous nuclear ribonucleoprotein D0	14924.4	25203.4	13286.5	12395.3	10953	11283	14725.8	12057	10845.9
Q14108	SCARB2	Homo sapiens	Lysosome membrane protein 2	9707.1	11708	11915.2	8748.26	13680.4	12588.1	33267.2	35571	34616
Q14117	DPYS	Homo sapiens	Dihydropyrimidinase	35530.6	30489.1	27229.2	36327.7	36243.3	37581.1	61149.4	65665.5	75470.1
Q14152	EIF3A	Homo sapiens	Eukaryotic translation initiation factor 3 subunit A	14163	16387.2	15560.3	14692.1	16428.1	15845.4	13304.3	10659.9	13984.4
Q14166	TTLL12	Homo sapiens	Tubulin--tyrosine ligase-like protein 12	34102.5	33857.6	30402.7	22768.8	15794.6	22533.5	14634.7	17128.2	22577
Q14194	CRMP1	Homo sapiens	Dihydropyrimidinase-related protein 1	8048.2	7434.99	6893.52	4443.93	5889.77	7075.13	4246.8	2810.94	3780.87
Q14203	DCTN1	Homo sapiens	Dynactin subunit 1	1791.25	3241.02	3014.17	2999.06	3834.58	3019.07	4363.63	3437.86	3331.81
Q14204	DYNC1H1	Homo sapiens	Cytoplasmic dynein 1 heavy chain 1	63993.2	65202.5	65915.4	58677.6	49199.7	57835.8	32198	34002.5	32312.8
Q14240	EIF4A2	Homo sapiens	Eukaryotic initiation factor 4A-II	42408.4	47495	46769.9	40672.2	34250.3	39101.4	48686.2	54180.1	53695.4
Q14314	FGL2	Homo sapiens	Fibroleukin	2174.94	2829.9	3040.77	1147.41	1019.52	1495.47	1041.7	215.864	1040.44
Q14511	NEDD9	Homo sapiens	Enhancer of filamentation 1	13255.2	13179.6	23070.5	10961	23873.7	28683.6	25359.8	31012.3	13249.1
Q14517	FAT1	Homo sapiens	Protocadherin Fat 1	2434.27	3176.1	2858.41	4490.12	4597.45	2126.06	3113.4	4069.83	2711.42
Q14624	ITIH4	Homo sapiens	Inter-alpha-trypsin inhibitor heavy chain H4	6012.23	7457.27	7660.64	9147.19	3265.06	5463.34	3596.48	3086.71	3563.1
Q14651	PLS1	Homo sapiens	Plastin-1	NaN	NaN	1.8331	11.8375	NaN	3.75359	NaN	2.84145	0.0187411
Q14694	USP10	Homo sapiens	Ubiquitin carboxyl-terminal hydrolase 10	2915.6	2291.07	3636.23	1876.62	1338.29	1528.07	2976.99	3113.13	4316.19
Q14697	GANAB	Homo sapiens	Neutral alpha-glucosidase AB	23580	26589.5	26067.4	22082.6	20568.3	21509.8	22840.1	26470	27401.8
Q14764	MVP	Homo sapiens	Major vault protein	67857.7	67994.4	71631.8	497485	538790	526216	454061	436195	427384
Q14847	LASP1	Homo sapiens	LIM and SH3 domain protein 1	4799.71	5623.01	5941.69	7405.14	7735.35	9048.43	5080.06	2831.21	1304.56
Q14914	PTGR1	Homo sapiens	Prostaglandin reductase 1	6304.23	7143.56	5682.6	2959.5	7236.2	6744.6	12283.6	12793.7	14246.2
Q14956	GPNMB	Homo sapiens	Transmembrane glycoprotein NMB	16015.7	20225.3	17191.4	8059.16	3509.27	7251.29	27331.1	30782.5	35458.2
Q14974	KPNB1	Homo sapiens	Importin subunit beta-1	10679.3	11277.5	11238.6	11361.5	10527.4	9419.2	4990.17	3299.98	4567.9
Q14997	PSME4	Homo sapiens	Proteasome activator complex subunit 4	3171.8	2998.62	3080.01	2401.88	3847.42	4005.57	1705.82	1218.05	2331.69
Q15008	PSMD6	Homo sapiens	26S proteasome non-ATPase regulatory subunit 6	47593.5	43853.6	46865.8	49618.9	48911.8	58578.8	34154.7	35917.4	41672.1
Q15018	ABRAXAS2	Homo sapiens	BRISC complex subunit Abraxas 2	2466.35	2305.84	2498.24	2350.54	3469.71	2005.79	521.348	NaN	817.411
Q15019	SEPTIN2	Homo sapiens	Septin-2	6787.8	7243.28	11258.9	7369.94	3107.42	6325.18	7775.7	5686.87	5324.38
Q15029	EFTUD2	Homo sapiens	116 kDa U5 small nuclear ribonucleoprotein component	11268.2	13418.4	11860.2	14058.1	11999.9	12887.3	16640.7	12042.7	12028.8
Q15041	ARL6IP1	Homo sapiens	ADP-ribosylation factor-like protein 6-interacting protein 1	680.255	2604.15	1555.13	3663.91	2858.93	1978.47	2865.75	NaN	817.432
Q15042	RAB3GAP1	Homo sapiens	Rab3 GTPase-activating protein catalytic subunit	3704.84	2885.58	3375.83	1533.19	NaN	1387.02	1917.97	2108.07	2574.77
Q15043	SLC39A14	Homo sapiens	Metal cation symporter ZIP14	707.014	4568.34	10293.3	799.212	4661.37	4571.13	219.467	479.358	1427.68
Q15046	KARS1	Homo sapiens	Lysine--tRNA ligase	11502	11801.4	11672.6	9554.11	10125.5	9465.41	11834.8	16691.4	13685.5
Q15063	POSTN	Homo sapiens	Periostin	54745.7	49537.8	53194	64617.9	58571.1	60600.6	70430.2	70771.2	74456.1
Q15102	PAFAH1B3	Homo sapiens	Platelet-activating factor acetylhydrolase IB subunit alpha1	2077.71	2029.63	3577.03	NaN	592.289	1443.71	NaN	540.609	NaN
Q15139	PRKD1	Homo sapiens	Serine/threonine-protein kinase D1	5392.06	3222.83	6969.23	5078.03	1907.53	5530.52	1524.94	2055.21	NaN
Q15149	PLEC	Homo sapiens	Plectin	41015	44366.6	46146.8	32451.2	32022.1	33313.4	24985.7	25636.7	22572.4
Q15172	PPP2R5A	Homo sapiens	Serine/threonine-protein phosphatase 2A 56 kDa regulatory subunit alpha isoform	3131.96	1744.36	3134.3	1083.67	745.226	1711.31	1298.85	1806.3	745.18
Q15185	PTGES3	Homo sapiens	Prostaglandin E synthase 3	2144.49	2746.72	2888.71	2041.43	2924.98	3681.58	1693.16	2640.86	2480.55
Q15233	NONO	Homo sapiens	Non-POU domain-containing octamer-binding protein	NaN	3.4267	NaN	0.00361827	NaN	1.04082	6.09369	NaN	NaN
Q15286	RAB35	Homo sapiens	Ras-related protein Rab-35	2021.16	2377.69	2401.29	2333.56	2313.49	1709.97	4536.63	2382.31	4476.95
Q15287	RNPS1	Homo sapiens	RNA-binding protein with serine-rich domain 1	5412.01	5336.35	5300.02	2555.23	3350.37	4741.74	11169	8513.95	12432
Q15303	ERBB4	Homo sapiens	Receptor tyrosine-protein kinase erbB-4	4125.48	3712.59	4133.82	14287.8	11328.4	10950.5	2197.83	6802.7	5058.07
Q15365	PCBP1	Homo sapiens	Poly(rC)-binding protein 1	19410.1	18484.8	14399.8	26792.7	23083.6	24981.8	11560.6	10268.9	13619.3
Q15366	PCBP2	Homo sapiens	Poly(rC)-binding protein 2	8581.12	8971.85	8335.21	9843.99	10233.9	8608.16	6439.25	5476.12	6687.48
Q15393	SF3B3	Homo sapiens	Splicing factor 3B subunit 3	10638.1	12341.7	9404.86	8419.13	8473.28	6778.52	5395.53	4840.38	4321.57
Q15418	RPS6KA1	Homo sapiens	Ribosomal protein S6 kinase alpha-1	18596.2	12728.2	14682.3	14586.2	9647.33	13926.3	11672.8	7635.4	10481
Q15435	PPP1R7	Homo sapiens	Protein phosphatase 1 regulatory subunit 7	12743.9	5974.72	10423.4	8873.76	3718.22	6268.25	3043.28	3860.71	3959.46
Q15437	SEC23B	Homo sapiens	Protein transport protein Sec23B	4023.91	5725.47	6348.99	6098.81	2258.93	4907.9	1274.54	3242.82	NaN
Q15493	RGN	Homo sapiens	Regucalcin	26620.8	28557.5	31997.4	27418.8	32431.6	29493.5	44378.6	46782.1	57986
Q15517	CDSN	Homo sapiens	Corneodesmosin	9628.06	4603.48	3493.09	4319.46	4087.06	4313.72	13994.3	6514.88	8952.61
Q15528	MED22	Homo sapiens	Mediator of RNA polymerase II transcription subunit 22	3554.71	1168.42	4962.83	3399.31	NaN	NaN	3839.34	4864.73	4740.25
Q15555	MAPRE2	Homo sapiens	Microtubule-associated protein RP/EB family member 2	2296.06	2455.88	2429.24	1611.47	1001.47	1499.2	5337.31	3748.45	2776.15
Q15582	TGFBI	Homo sapiens	Transforming growth factor-beta-induced protein ig-h3	6543.26	6020.97	7043.14	11958.9	12668.5	11155.7	3856.66	3236.66	3418.22
Q15631	TSN	Homo sapiens	Translin	22416.2	21881.2	18610.8	15283.8	12069	14759	15997.5	17343.7	14189.1
Q15646	OASL	Homo sapiens	2'-5'-oligoadenylate synthase-like protein	256.95	835.898	358.027	686.571	352.853	788.844	2433.86	1863.45	3113.89
Q15691	MAPRE1	Homo sapiens	Microtubule-associated protein RP/EB family member 1	5126.92	2894.45	2573.13	3353.17	3318.15	3454.26	3761.9	2757.39	2498.8
Q15758	SLC1A5	Homo sapiens	Neutral amino acid transporter B(0)	11412.3	12045.9	12002.1	23014.9	14615.2	16779.4	13376	10066.4	17462.9
Q15833	STXBP2	Homo sapiens	Syntaxin-binding protein 2	2993	3608.46	3584.72	1934.28	2186.07	2749.13	5911.86	4862.02	4820.62
Q15942	ZYX	Homo sapiens	Zyxin	11828.9	11992.2	10704.3	12954.8	10243.6	11386.2	6897.83	7327.36	7351.4
Q16181	SEPTIN7	Homo sapiens	Septin-7	2073.21	5736.73	7817.99	2259.92	5552.38	3484.95	3719.06	2361.32	21.048
Q16186	ADRM1	Homo sapiens	Proteasomal ubiquitin receptor ADRM1	4822.25	4810.37	4620.15	4882.1	6473.21	3374.68	7560.63	6503.25	6994.93
Q16222	UAP1	Homo sapiens	UDP-N-acetylhexosamine pyrophosphorylase	3337.88	4121.74	3141.36	2446.37	2450.89	3641.76	2116.64	4100.21	2677.55
Q16531	DDB1	Homo sapiens	DNA damage-binding protein 1	955.252	3097.38	2673.55	3842.69	1952.89	1380.44	2295.99	3106.59	3912.04
Q16553	LY6E	Homo sapiens	Lymphocyte antigen 6E	720.401	871.642	1125.96	NaN	449.791	NaN	12062.3	16055.5	17034.9
Q16555	DPYSL2	Homo sapiens	Dihydropyrimidinase-related protein 2	55966.4	57916.1	60731.9	44859.8	49417.3	53219.1	25968.7	25964.9	22084.6
Q16576	RBBP7	Homo sapiens	Histone-binding protein RBBP7	4678.62	6392.04	4366.03	4750.12	4838.62	3401.31	3554.56	3585.67	4743.46
Q16629	SRSF7	Homo sapiens	Serine/arginine-rich splicing factor 7	37578	32743.2	38299.8	32202.3	28736.4	29183.2	23796.4	42643.9	44618.9
Q16658	FSCN1	Homo sapiens	Fascin	17010.7	19898.9	23331.1	16341.4	19432.8	19816.8	12500.9	12811.1	8661.21
Q16698	DECR1	Homo sapiens	2,4-dienoyl-CoA reductase [(3E)-enoyl-CoA-producing], mitochondrial	26917.5	11138.8	12716.5	7469.4	8491.38	7796.21	11832.3	24360.4	24527.2
Q16719	KYNU	Homo sapiens	Kynureninase	2118.08	1165.42	1156.8	NaN	NaN	1530.49	829.735	1313	5.1231
Q16831	UPP1	Homo sapiens	Uridine phosphorylase 1	38716.2	40750.3	31077	27198.4	17501.9	19778.6	9817	10503.4	18483.3
Q16851	UGP2	Homo sapiens	UTP--glucose-1-phosphate uridylyltransferase	18829.5	17438.2	18720.2	35685.1	21374.2	26511.4	21944.2	23747.5	11868.7
Q3KQV9	UAP1L1	Homo sapiens	UDP-N-acetylhexosamine pyrophosphorylase-like protein 1	6651.12	7337.27	5525.28	5758.89	4720.16	6522.26	7834.17	6075.4	5098.31
Q3LXA3	TKFC	Homo sapiens	Triokinase/FMN cyclase	4027.13	5242.13	6037.18	1574.51	1747.46	1245.95	4005.11	4771.81	3652.66
Q3ZCM7	TUBB8	Homo sapiens	Tubulin beta-8 chain	1.41486	1968.53	242.431	1.5848	713.072	1002.12	939.774	1.27374	1.37406
Q4KMQ2	ANO6	Homo sapiens	Anoctamin-6	925.033	NaN	368.327	1.89345	978.535	NaN	1509.92	1527.35	NaN
Q53G44	IFI44L	Homo sapiens	Interferon-induced protein 44-like	0.0439935	NaN	1.8865	NaN	NaN	NaN	259.383	268.537	382.416
Q53H96	PYCR3	Homo sapiens	Pyrroline-5-carboxylate reductase 3	6169.19	3994.3	3105.29	7869.45	2358.63	4786.41	2557.13	NaN	1833.93
Q53S08	RAB6D	Homo sapiens	Ras-related protein Rab-6D	57293.1	91554.6	72390.5	51261.8	56788.6	54822.4	56767.2	47734.6	48108.6
Q562R1	ACTBL2	Homo sapiens	Beta-actin-like protein 2	21967.6	20555.5	31621.8	25433.1	28695.2	23399.1	22482.3	10768.4	23435
Q58FF6	HSP90AB4P	Homo sapiens	Putative heat shock protein HSP 90-beta 4	14425.4	5199.3	9883.04	6715.89	11518.7	10302.6	6465.7	1391.88	5881.81
Q58FF8	HSP90AB2P	Homo sapiens	Putative heat shock protein HSP 90-beta 2	104121	125945	125914	129208	115552	135117	158084	161013	246637
Q5D862	FLG2	Homo sapiens	Filaggrin-2	510.654	NaN	NaN	0.956608	NaN	1.04004	1.04874	NaN	285.56
Q5EBM0	CMPK2	Homo sapiens	UMP-CMP kinase 2, mitochondrial	810.927	549.172	829.795	389.865	80.3947	NaN	7319.68	7990.59	5292.86
Q5JRA6	MIA3	Homo sapiens	Transport and Golgi organization protein 1 homolog	NaN	NaN	NaN	0.965278	NaN	NaN	1.25544	1	469.232
Q5K651	SAMD9	Homo sapiens	Sterile alpha motif domain-containing protein 9	3169.57	4259.51	4352.66	1475.69	3254.09	868.328	13299.6	15811.1	24055.5
Q5T011	SZT2	Homo sapiens	KICSTOR complex protein SZT2	7.004	2.47886	NaN	0.00416264	NaN	NaN	NaN	NaN	1
Q5T4S7	UBR4	Homo sapiens	E3 ubiquitin-protein ligase UBR4	16914.7	15497.9	17889.6	22545.8	18022.8	21286.6	11489	14596.5	12941.9
Q5T749	KPRP	Homo sapiens	Keratinocyte proline-rich protein	33149.8	4430.33	5270.66	8257.45	7823.64	7281.48	28359.8	16999.3	10703.1
Q5TBB1	RNASEH2B	Homo sapiens	Ribonuclease H2 subunit B	130.88	161.13	2673.62	NaN	NaN	330.828	1.10861	2711.42	0.947269
Q5TEC6	H3-7	Homo sapiens	Histone H3-7	4893.22	6539.04	4925.69	6118.09	6152.65	4651.54	8827.65	9950.92	9736.9
Q5TEJ8	THEMIS2	Homo sapiens	Protein THEMIS2	2438.79	3082.97	3093.12	7606.02	1960.92	3167.37	3737.78	6027.65	10002.2
Q5TH69	ARFGEF3	Homo sapiens	Brefeldin A-inhibited guanine nucleotide-exchange protein 3	1160.18	879.664	1489.03	1031.64	3237.04	1902.32	2555.02	2622.16	4347.44
Q5VUB5	FAM171A1	Homo sapiens	Protein FAM171A1	116609	42434.3	32880	102879	68948	89854.5	107154	77833.7	56506.5
Q5VWZ2	LYPLAL1	Homo sapiens	Lysophospholipase-like protein 1	4919.54	5597.09	5116.75	4738.91	3171.37	2556.75	3218.48	3347.36	3317.55
Q63HN8	RNF213	Homo sapiens	E3 ubiquitin-protein ligase RNF213	2811.61	1934.49	2513.36	2955.46	2781.38	1222.27	11895	13875.4	13478.4
Q641Q3	METRNL	Homo sapiens	Meteorin-like protein	224.151	409.16	979.956	1939.42	2871.87	1386	NaN	NaN	NaN
Q66K74	MAP1S	Homo sapiens	Microtubule-associated protein 1S	4094.52	3187.41	3422.56	3851.01	3411.03	3765.12	3680.59	1635.15	1939.04
Q68E01	INTS3	Homo sapiens	Integrator complex subunit 3	NaN	NaN	382.938	1.7598	459.88	431.104	829.51	334.191	1105.28
Q6H9L7	ISM2	Homo sapiens	Isthmin-2	67024.2	82360.4	365709	10473.3	49724.4	187227	508775	880148	84870.3
Q6I9Y2	THOC7	Homo sapiens	THO complex subunit 7 homolog	246.989	541.449	241.018	295.439	265.595	342.026	366.058	348.583	1312.38
Q6IBS0	TWF2	Homo sapiens	Twinfilin-2	4109.55	6604.19	6677.41	7115.51	6245.36	7473.96	7212.78	3449.22	18353.3
Q6NUP7	PPP4R4	Homo sapiens	Serine/threonine-protein phosphatase 4 regulatory subunit 4	62969.2	56672.6	75875.2	61574.8	28251.7	42574.6	78091.1	65417.4	63056
Q6P2Q9	PRPF8	Homo sapiens	Pre-mRNA-processing-splicing factor 8	10569.5	11125.1	8727.35	9512.83	6390.08	9259.8	17369.2	15625.9	11431
Q6PJF5	RHBDF2	Homo sapiens	Inactive rhomboid protein 2	3478.83	2624.31	4018.45	1981.21	3705.02	2656.05	4380.02	3601.85	6323.03
Q6R327	RICTOR	Homo sapiens	Rapamycin-insensitive companion of mTOR	725.851	297.409	1928.01	1.04701	946.828	939.602	684.914	1015.92	1504.94
Q6RW13	AGTRAP	Homo sapiens	Type-1 angiotensin II receptor-associated protein	12229.3	15039.9	12950	11924.3	9686.87	11897.5	33119	36645	39025.5
Q6SA08	TSSK4	Homo sapiens	Testis-specific serine/threonine-protein kinase 4	32259.6	24615.5	24752.9	45324.7	37401.3	41148.6	16441	15535.9	19875.4
Q6UWD8	C16orf54	Homo sapiens	Transmembrane protein C16orf54	4941.66	6850.85	6570.1	15255.3	12031.3	12312.6	4809.3	5077.33	6982.85
Q6UXN9	WDR82	Homo sapiens	WD repeat-containing protein 82	1390.93	239.054	1655.29	1407.62	1372.85	1725.94	526.622	1216.42	777.026
Q6V0I7	FAT4	Homo sapiens	Protocadherin Fat 4	4276.27	5711.3	6179.3	6413.24	6793.07	6235.99	8167.86	5704	5559.26
Q6VN20	RANBP10	Homo sapiens	Ran-binding protein 10	5106.86	11108.9	6092.3	12304	11810.8	3335.42	10031.6	2997.06	3969.72
Q6XQN6	NAPRT	Homo sapiens	Nicotinate phosphoribosyltransferase	7962.12	9716.19	5426.75	4109.05	4448.33	6295.63	5425.81	8377.35	8875.41
Q6ZRV2	FAM83H	Homo sapiens	Protein FAM83H	3083.37	3079.01	2128.47	7787.98	3906.59	3678.42	2682.86	3267.29	6451.48
Q6ZS81	WDFY4	Homo sapiens	WD repeat- and FYVE domain-containing protein 4	27772.5	27472	29177.4	31524.4	28459.6	29317.1	15752	18246.4	18036.8
Q702N8	XIRP1	Homo sapiens	Xin actin-binding repeat-containing protein 1	1665.76	2507.25	2559.44	483.786	1104.51	548.411	1085.1	325.443	1.59263
Q76LX8	ADAMTS13	Homo sapiens	A disintegrin and metalloproteinase with thrombospondin motifs 13	7938.09	7168.22	7230.73	12128.6	5605.29	8211.43	3237.76	3533.86	2749.64
Q7KZF4	SND1	Homo sapiens	Staphylococcal nuclease domain-containing protein 1	18136.9	18153.3	20543.7	13908.7	12829.8	13383.1	12306	12810.4	14374.3
Q7L014	DDX46	Homo sapiens	Probable ATP-dependent RNA helicase DDX46	2200.69	1337.97	1626.06	1519.96	746.985	382.82	2455.9	3167.11	972.194
Q7L1Q6	BZW1	Homo sapiens	eIF5-mimic protein 2	4177.21	4891.89	2512.5	4139.4	2208.02	4480.27	6480.71	2942.93	3976.33
Q7L576	CYFIP1	Homo sapiens	Cytoplasmic FMR1-interacting protein 1	17064.7	18230.7	16925.4	23201.6	20510.2	13246.3	21767.9	24750.3	24033.8
Q7L5Y9	MAEA	Homo sapiens	E3 ubiquitin-protein transferase MAEA	2474.41	2054.35	2752.98	1220.21	3903.17	2246.35	1878.28	NaN	3075.41
Q7Z2H8	SLC36A1	Homo sapiens	Proton-coupled amino acid transporter 1	972.726	2372.22	773.541	962.135	1656.46	782.149	5704.61	3390.77	7554.88
Q7Z2W4	ZC3HAV1	Homo sapiens	Zinc finger CCCH-type antiviral protein 1	1273.32	1284.23	1517.14	585.637	1271.49	824.259	469.852	854.689	1.41878
Q7Z3U7	MON2	Homo sapiens	Protein MON2 homolog	328.953	307.561	2998.3	1838.69	1769.74	655.063	1904.11	3354.93	3442.84
Q7Z3Z0	KRT25	Homo sapiens	Keratin, type I cytoskeletal 25	17531.4	3973.64	2522.77	3455.08	3281.17	4540.74	5458.55	3202.72	2729.94
Q7Z418	KCNK18	Homo sapiens	Potassium channel subfamily K member 18	64967.6	54257	58945.4	73352.6	61954.2	94204.9	57606.5	66691.1	64817.9
Q7Z478	DHX29	Homo sapiens	ATP-dependent RNA helicase DHX29	2351.35	1892.67	3280.4	3292.41	1797.08	1625.38	2808.96	1066.43	NaN
Q7Z4F1	LRP10	Homo sapiens	Low-density lipoprotein receptor-related protein 10	439.646	347.52	788.897	NaN	10.2183	323.862	6492.26	7343.01	9335.13
Q7Z589	EMSY	Homo sapiens	BRCA2-interacting transcriptional repressor EMSY	1.057	NaN	NaN	1.07303	NaN	0.997623	1.1621	1.13288	1.21445
Q7Z5P9	MUC19	Homo sapiens	Mucin-19	4179.88	5741.63	8784.55	6406.16	24117.1	9349.88	19213	10927.4	NaN
Q7Z5R6	APBB1IP	Homo sapiens	Amyloid beta A4 precursor protein-binding family B member 1-interacting protein	3597.08	3887.01	3606.3	3815.83	4987.72	3734.37	3940.37	2806.21	3560.42
Q7Z6Z7	HUWE1	Homo sapiens	E3 ubiquitin-protein ligase HUWE1	3271.14	3124.34	2823.89	2474.94	1957.97	1776.11	1231.37	1765.24	2241.93
Q7Z7N9	TMEM179B	Homo sapiens	Transmembrane protein 179B	1985.48	1903.24	1253.42	1877.5	1252.91	937.374	12330.6	10245.3	11298.6
Q86TI2	DPP9	Homo sapiens	Dipeptidyl peptidase 9	3513.88	4048.51	3323.88	3195.19	2934.95	2630.71	2170.1	3847.82	4814.7
Q86TU7	SETD3	Homo sapiens	Actin-histidine N-methyltransferase	2463.98	1984.27	2503.42	1671.81	963.188	1492.96	1619.72	449.209	3384.51
Q86UV5	USP48	Homo sapiens	Ubiquitin carboxyl-terminal hydrolase 48	1.02968	NaN	NaN	1241.51	NaN	NaN	1.03573	371.325	NaN
Q86UX7	FERMT3	Homo sapiens	Fermitin family homolog 3	40078.3	43972.5	46776.1	49556	41128.1	44991.3	65306.5	67436.7	69694.3
Q86VP6	CAND1	Homo sapiens	Cullin-associated NEDD8-dissociated protein 1	14538.3	15281.5	13513.5	16059.2	11867.8	16225	14859.9	13688.3	16725.4
Q86W42	THOC6	Homo sapiens	THO complex subunit 6 homolog	9230.48	9452.26	10026.1	7820.55	6283.98	6242.01	9310.8	9268.36	9954.15
Q86WH2	RASSF3	Homo sapiens	Ras association domain-containing protein 3	3137.46	6025.72	10580.5	4015.22	9662.48	7595.91	17498	16199.4	9732.09
Q86WI1	PKHD1L1	Homo sapiens	Fibrocystin-L	9543.9	8193.67	7275.55	11636.7	10261.4	7626.89	11793.4	15292.3	15947.4
Q86WS4	C12orf40	Homo sapiens	Uncharacterized protein C12orf40	56727	18707.2	7463.2	19645.5	12030	12227.4	11820.9	15773.6	50.1889
Q86X10	RALGAPB	Homo sapiens	Ral GTPase-activating protein subunit beta	460.78	1.59277	404.221	229.62	196.158	1.51473	1.21206	1.19553	395.262
Q86X55	CARM1	Homo sapiens	Histone-arginine methyltransferase CARM1	925.963	664.232	954.943	943.802	556.42	728.599	459.202	460.538	1.08681
Q86XS8	RNF130	Homo sapiens	E3 ubiquitin-protein ligase RNF130	15753.4	18711.2	13716.2	27064.9	17627.7	17878.7	32148.3	32244.9	41035
Q86Y25	ZNF354C	Homo sapiens	Zinc finger protein 354C	421.277	873.677	174.131	2.122	796.896	1834.01	439.504	NaN	4.41567
Q86Y46	KRT73	Homo sapiens	Keratin, type II cytoskeletal 73	1.69098e+06	310527	184983	265463	343446	342630	1.21594e+06	616582	184147
Q86Y82	STX12	Homo sapiens	Syntaxin-12	2303.34	3476.01	3141.39	4087.78	4021.2	2285.78	10425	14173	13659.9
Q86YZ3	HRNR	Homo sapiens	Hornerin	8797.22	1514.3	2839.25	1226.36	4072.28	962.553	708.652	7317.48	136.016
Q8IUR7	ARMC8	Homo sapiens	Armadillo repeat-containing protein 8	1844.36	2272.68	2414.51	955.008	1674.44	1375.45	1833.64	1472.4	1485.24
Q8IV08	PLD3	Homo sapiens	5'-3' exonuclease PLD3	22343.4	21718.7	19145.5	39170.4	31518.9	33308.7	22804.2	24037.5	25803.8
Q8IVG5	SAMD9L	Homo sapiens	Sterile alpha motif domain-containing protein 9-like	NaN	NaN	NaN	0.974481	NaN	NaN	626.735	636.625	1
Q8IWB7	WDFY1	Homo sapiens	WD repeat and FYVE domain-containing protein 1	6405.67	5923.07	4721.25	8322.13	7081.9	7224.86	10766	13068.4	15177.2
Q8IWC1	MAP7D3	Homo sapiens	MAP7 domain-containing protein 3	144810	183366	131609	189679	133574	154749	48850.6	22946.7	34761
Q8IWV8	UBR2	Homo sapiens	E3 ubiquitin-protein ligase UBR2	2772.94	4830.94	3138.31	2574.98	2667.8	5149.54	1.11544	473.435	3371.72
Q8IX05	CD302	Homo sapiens	CD302 antigen	0.817215	NaN	NaN	1	NaN	NaN	1.63133	NaN	1.08977
Q8IXQ6	PARP9	Homo sapiens	Protein mono-ADP-ribosyltransferase PARP9	NaN	NaN	NaN	NaN	NaN	NaN	5804.01	6547.1	7359.15
Q8IY22	CMIP	Homo sapiens	C-Maf-inducing protein	2.21174	NaN	NaN	0.0340639	0.0235633	0.0237822	8.62459	22.4235	29.2081
Q8IZP0	ABI1	Homo sapiens	Abl interactor 1	3272.72	2632.23	2476.18	1118.43	1940.27	2806.18	5085.38	4810.05	5141.37
Q8N119	MMP21	Homo sapiens	Matrix metalloproteinase-21	16305.7	20261.8	18270.8	19781.8	13579.9	15249.6	6654.55	6103.6	4299.08
Q8N122	RPTOR	Homo sapiens	Regulatory-associated protein of mTOR	2772.95	1927.13	1343.1	3208.18	1979.79	2030.66	2421.52	1631.29	1976.36
Q8N131	TMEM123	Homo sapiens	Porimin	35905.7	31421.3	34260.1	24691.7	29375.9	31037.9	177947	162355	180388
Q8N142	ADSS1	Homo sapiens	Adenylosuccinate synthetase isozyme 1	6387.45	12349.7	11605.6	7726.92	17957.3	16607.3	22815.4	26573.1	14333.7
Q8N163	CCAR2	Homo sapiens	Cell cycle and apoptosis regulator protein 2	3771.43	13696.9	9041.78	4108.18	7937.43	7803.19	3570.76	759.925	4727.6
Q8N184	ZNF567	Homo sapiens	Zinc finger protein 567	NaN	19705.5	586.285	0.844488	605.142	23.9167	NaN	NaN	NaN
Q8N1N4	KRT78	Homo sapiens	Keratin, type II cytoskeletal 78	1.88296e+06	357551	235021	413394	548284	485352	1.00011e+06	440690	349532
Q8N2I2	ZNF619	Homo sapiens	Zinc finger protein 619	6449.42	6344.23	6839.62	5756.08	6122.9	5846.62	16832.7	12841.6	8140.68
Q8N490	PNKD	Homo sapiens	Probable hydrolase PNKD	440.448	223.435	971.604	1150.05	NaN	1.04524	1340.41	676.011	678.121
Q8N4A0	GALNT4	Homo sapiens	Polypeptide N-acetylgalactosaminyltransferase 4	2617.33	2793.57	3119.01	3719.07	4384.5	4324.8	11481.3	8628.97	10301.9
Q8N5I2	ARRDC1	Homo sapiens	Arrestin domain-containing protein 1	902.375	NaN	923.031	3399.19	3473.19	2901.66	NaN	NaN	NaN
Q8NA29	MFSD2A	Homo sapiens	Sodium-dependent lysophosphatidylcholine symporter 1	6455.09	7385.9	7288.29	12719.4	10177.4	12614.3	23959.3	23640.1	22179.4
Q8NBI5	SLC43A3	Homo sapiens	Equilibrative nucleobase transporter 1	1986.56	1777.4	1753.25	2407.48	2596.57	3274.91	4316.95	5654.85	7941.23
Q8NBJ5	COLGALT1	Homo sapiens	Procollagen galactosyltransferase 1	8953.71	11104.5	11001.7	7092.96	6538.62	5808.99	4774.44	2143.94	2790.72
Q8NBW4	SLC38A9	Homo sapiens	Sodium-coupled neutral amino acid transporter 9	NaN	NaN	111.033	625.363	464.508	NaN	227.944	626.951	521.857
Q8NC42	RNF149	Homo sapiens	E3 ubiquitin-protein ligase RNF149	2117.31	1845.38	2894.23	9748.16	4691.78	5847.2	7350.94	6393.99	9416.62
Q8ND71	GIMAP8	Homo sapiens	GTPase IMAP family member 8	NaN	NaN	NaN	1.14994	NaN	0.897755	0.00406837	1.64235	3.43389
Q8NF50	DOCK8	Homo sapiens	Dedicator of cytokinesis protein 8	13910.9	16759.1	13274.1	14698.6	10970.2	15256.7	19587.7	17131.9	14949.7
Q8NFH3	NUP43	Homo sapiens	Nucleoporin Nup43	11784.8	10994.1	10390.3	12811.6	10232.2	11997.6	8292.24	11993.2	13833.1
Q8NFI3	ENGASE	Homo sapiens	Cytosolic endo-beta-N-acetylglucosaminidase	7081.64	6723.38	7003.66	5668.85	5848.23	6241.09	26881.7	28088.9	28167.8
Q8NFW8	CMAS	Homo sapiens	N-acylneuraminate cytidylyltransferase	5175.21	3266.18	4201.51	7031.47	7232.27	7493.64	6781.63	7171.07	5036.78
Q8NG11	TSPAN14	Homo sapiens	Tetraspanin-14	1.91415	1.29383	NaN	NaN	3.85181	3.62924	0.00658764	0.00578748	0.00605793
Q8NHP1	AKR7L	Homo sapiens	Aflatoxin B1 aldehyde reductase member 4	5864.11	4611.37	5701.26	8268.07	5369.05	5294.27	7996.08	8313.24	9678.95
Q8TAQ2;Q92922	SMARCC2;SMARCC1	Homo sapiens	SWI/SNF complex subunit SMARCC2;SWI/SNF complex subunit SMARCC1	6220.06	7326.58	5874.17	8759.24	9736.13	8120.42	5814.24	8196.95	5695.38
Q8TAW3	ZNF671	Homo sapiens	Zinc finger protein 671	2.76619	296.908	1.9102	2.17613	1.91429	1.03238	2.48189	1.67635	1.21664
Q8TB61	SLC35B2	Homo sapiens	Adenosine 3'-phospho 5'-phosphosulfate transporter 1	1873.03	860.348	2872.77	3421.84	1628.49	829.976	2702.21	2243.71	1605.73
Q8TBC3	SHKBP1	Homo sapiens	SH3KBP1-binding protein 1	NaN	556.288	3.80409	4.59516	2.73512	3.65439	4.61875	4.77289	653.443
Q8TBC4	UBA3	Homo sapiens	NEDD8-activating enzyme E1 catalytic subunit	7789.34	7845.78	31307.8	3942.25	4964.93	3887.25	6234.71	11160.8	1889.52
Q8TCB0	IFI44	Homo sapiens	Interferon-induced protein 44	NaN	NaN	NaN	1.03896	NaN	NaN	3227.62	2086.93	2188.13
Q8TCZ2	CD99L2	Homo sapiens	CD99 antigen-like protein 2	1523.14	706.144	2089.46	1376.63	1833.08	911.664	4304.47	2877.07	3633.24
Q8TD19	NEK9	Homo sapiens	Serine/threonine-protein kinase Nek9	5580.43	5229.06	5084.85	4958.5	4775.47	5711.25	3653.7	3847.39	3911.48
Q8TD55	PLEKHO2	Homo sapiens	Pleckstrin homology domain-containing family O member 2	872.166	807.258	482.289	498.447	NaN	174.994	1.08601	1.63598	1.82883
Q8TDZ2	MICAL1	Homo sapiens	[F-actin]-monooxygenase MICAL1	23724.6	27198.5	24046.8	22104.3	22229.2	22148.9	28061.4	25283.3	24966.7
Q8TEQ6	GEMIN5	Homo sapiens	Gem-associated protein 5	4178.64	2437.21	3462.27	2915.13	1642.79	2649.55	1082.34	4141.9	1620.64
Q8TF09;Q9NP97	DYNLRB2;DYNLRB1	Homo sapiens	Dynein light chain roadblock-type 2;Dynein light chain roadblock-type 1	2138.07	3668.49	2632.72	1531.26	3101.65	3328.78	1783.57	2288.07	2205.64
Q8WU79	SMAP2	Homo sapiens	Stromal membrane-associated protein 2	14502.7	13488.2	15029.2	9115.68	7018.03	7234.36	5744.6	8280.14	7432.84
Q8WUM4	PDCD6IP	Homo sapiens	Programmed cell death 6-interacting protein	95972.8	97696.3	103610	114498	107511	107382	88944.2	98548.5	94831.5
Q8WUM9	SLC20A1	Homo sapiens	Sodium-dependent phosphate transporter 1	3115.81	2869.17	5596.5	2023.91	3401.42	1152.64	3631.65	2389.75	NaN
Q8WUW1	BRK1	Homo sapiens	Protein BRICK1	11945.4	11010.8	10123.3	9660.76	13244.8	9608.38	11976.1	12506.8	13240
Q8WWB7	GLMP	Homo sapiens	Glycosylated lysosomal membrane protein	2586.42	3106.6	1419.18	4713.08	3308.55	4959.92	4173.59	7543.86	13624
Q8WXF1	PSPC1	Homo sapiens	Paraspeckle component 1	1526.64	742.366	1128.57	1036.73	868.153	1615.94	733.913	1166.33	1.40327
Q92499	DDX1	Homo sapiens	ATP-dependent RNA helicase DDX1	406.151	1517.21	1838.39	1.14748	1403.3	1420.4	530.508	1742.85	362.804
Q92504	SLC39A7	Homo sapiens	Zinc transporter SLC39A7	NaN	NaN	NaN	0.431573	1	NaN	NaN	1.92537	NaN
Q92520	FAM3C	Homo sapiens	Protein FAM3C	6813.59	6446.51	7484.95	7615.27	5453.59	5670.35	13067.9	11090.8	14715.6
Q92537	SUSD6	Homo sapiens	Sushi domain-containing protein 6	278.923	877.143	729.321	1.05231	582.921	1.05081	4941.61	5713.98	5789.14
Q92544	TM9SF4	Homo sapiens	Transmembrane 9 superfamily member 4	4996.62	5760.86	4835.79	5136.18	3849.01	2829.46	6874.75	6356.83	7047.14
Q92572	AP3S1	Homo sapiens	AP-3 complex subunit sigma-1	2363.78	1938.97	2105.45	1544.12	2419.72	2994.74	421.834	1242.9	1632.85
Q92597	NDRG1	Homo sapiens	Protein NDRG1	4584.38	5696	4926	2504.01	3291.91	3184.1	1863.75	1030.65	630.834
Q92598	HSPH1	Homo sapiens	Heat shock protein 105 kDa	22076.6	19859	25616.4	23126.6	22375.2	20106.2	14398.1	13771	17442.1
Q92616	GCN1	Homo sapiens	eIF-2-alpha kinase activator GCN1	4220.45	3222.86	4040.98	4269.43	3480.5	3013.72	2949.71	1082.34	966.05
Q92619	ARHGAP45	Homo sapiens	Rho GTPase-activating protein 45	1072.7	1324.6	495.426	647.57	367.045	747.294	NaN	302.118	1.01377
Q92621	NUP205	Homo sapiens	Nuclear pore complex protein Nup205	18483.1	1695.14	36331.7	106196	52405.6	91829.7	62978.7	40863.3	68700
Q92696	RABGGTA	Homo sapiens	Geranylgeranyl transferase type-2 subunit alpha	2281.84	2344.17	2353.42	2070.33	1905.53	551.809	166.616	1892.75	2096.15
Q92734	TFG	Homo sapiens	Protein TFG	4014.89	4455.8	4717.53	9722.45	7291.82	3859.63	6806.65	10845.8	13740.6
Q92747	ARPC1A	Homo sapiens	Actin-related protein 2/3 complex subunit 1A	21935	22465.9	18075.9	19630	19966.9	17670.6	20157.1	18897.9	21101.1
Q92820	GGH	Homo sapiens	Gamma-glutamyl hydrolase	NaN	351.623	147.675	591.882	NaN	0.64159	622.814	1394.25	684.739
Q92835	INPP5D	Homo sapiens	Phosphatidylinositol 3,4,5-trisphosphate 5-phosphatase 1	6318.3	5715.03	6116.19	6317.13	5298.62	6413.9	10201.6	7259.86	9102.11
Q92841	DDX17	Homo sapiens	Probable ATP-dependent RNA helicase DDX17	10892.9	12786	11101.9	7193.91	6112.5	6329.32	8995.46	10755.6	10664.9
Q92888	ARHGEF1	Homo sapiens	Rho guanine nucleotide exchange factor 1	8814.34	7655.41	5627.03	2321.93	3916.38	3452.05	8332.85	4894.73	5707.51
Q92900	UPF1	Homo sapiens	Regulator of nonsense transcripts 1	3046.28	3743.93	3313.64	3657.65	2983.47	1125.99	1835.87	1314.92	1691.36
Q92945	KHSRP	Homo sapiens	Far upstream element-binding protein 2	3634.57	4075.85	3473.26	2110.12	3032.85	3139.27	3983.69	2903.83	3713.86
Q92973	TNPO1	Homo sapiens	Transportin-1	13676.1	15795.4	15380.2	10645.7	11906.5	13847.3	13124	12219.7	9690.6
Q92974	ARHGEF2	Homo sapiens	Rho guanine nucleotide exchange factor 2	4595.39	4985.43	5041.33	12258.3	4031.75	2451.53	8392.08	10554.6	6511.45
Q92982	NINJ1	Homo sapiens	Ninjurin-1	NaN	1220.96	NaN	884.457	315.508	727.313	1757.95	1497.87	1872.29
Q93008	USP9X	Homo sapiens	Probable ubiquitin carboxyl-terminal hydrolase FAF-X	234.135	2159.53	343.88	183.829	276.056	91.0836	358.138	1.30924	0.44773
Q93009	USP7	Homo sapiens	Ubiquitin carboxyl-terminal hydrolase 7	12736.8	21877.3	10638.9	11152.9	10107.7	11148.8	13124.4	9321.2	9292.87
Q93050	ATP6V0A1	Homo sapiens	V-type proton ATPase 116 kDa subunit a 1	3933.98	5438.42	3540.05	4410.56	7378.79	5434.53	3848.63	3293.96	3708.53
Q93063	EXT2	Homo sapiens	Exostosin-2	3794.66	5538.31	4948.32	6115.84	4371.86	4315.3	8303.78	8279.29	6728.05
Q93088	BHMT	Homo sapiens	Betaine--homocysteine S-methyltransferase 1	168202	169442	170904	150204	183769	164445	200341	218625	244252
Q93099	HGD	Homo sapiens	Homogentisate 1,2-dioxygenase	44609.3	45332.9	39571.3	73146.2	51864.4	57030.7	54065.7	61604.1	79066.4
Q969E2	SCAMP4	Homo sapiens	Secretory carrier-associated membrane protein 4	6.50631	7.03698	365.194	299.636	258.467	8.53523	1274.7	1266.49	2457.36
Q969P0	IGSF8	Homo sapiens	Immunoglobulin superfamily member 8	2772.34	2304.47	2219.73	8150.4	8248.44	10327	1413.51	1263.57	1403.17
Q969U7	PSMG2	Homo sapiens	Proteasome assembly chaperone 2	20429.2	23427.1	8854.44	36405.4	32096.4	37418.8	73620.4	90806.9	105471
Q96A26	FAM162A	Homo sapiens	Protein FAM162A	878.384	1611.26	1531.31	1886.43	1219.06	4577.69	1579.51	1803.99	1040.06
Q96AC1	FERMT2	Homo sapiens	Fermitin family homolog 2	1351.03	2118.83	2486.41	2455.33	1549.64	1181.41	2057.78	2460.75	1808.16
Q96B67	ARRDC3	Homo sapiens	Arrestin domain-containing protein 3	3377.6	3510.73	3921.42	4245.8	7077.36	6139.92	21945.1	19147.4	24452.1
Q96BW5	PTER	Homo sapiens	Phosphotriesterase-related protein	4249.85	7609.91	6628.04	19824.6	25492.8	20960.5	5398.87	5183.81	37.6933
Q96BY6	DOCK10	Homo sapiens	Dedicator of cytokinesis protein 10	5226.64	5686.9	6118.02	6914	6861.24	7431.46	3135.26	4019.66	5229.24
Q96C19	EFHD2	Homo sapiens	EF-hand domain-containing protein D2	2158.12	2708.07	2996.18	1083.72	1756.17	2072.52	2827.46	2629.92	4324.75
Q96C86	DCPS	Homo sapiens	m7GpppX diphosphatase	3855.44	3971.96	4235.4	156.279	1536.78	933.723	1717.83	765.379	1758.05
Q96CN7	ISOC1	Homo sapiens	Isochorismatase domain-containing protein 1	5485.39	4470.84	5594.31	4063.41	1160.26	4125.55	8535.97	6520.77	6286.58
Q96CS7	PLEKHB2	Homo sapiens	Pleckstrin homology domain-containing family B member 2	1.07155	308.634	1412.34	289.591	2688.56	3140.88	880.472	2420.69	NaN
Q96CW5	TUBGCP3	Homo sapiens	Gamma-tubulin complex component 3	3029.87	2962.7	2343.21	2250.12	2407.23	2894.15	4788.89	4395.81	4231.88
Q96CX2	KCTD12	Homo sapiens	BTB/POZ domain-containing protein KCTD12	7041.18	7573.93	8111.08	9905.5	9898.23	9589.23	11006.5	11841.1	12582.8
Q96DG6	CMBL	Homo sapiens	Carboxymethylenebutenolidase homolog	26655.7	29079	24150	30419.2	28215.8	27141.7	50832	55529.9	53566.6
Q96DI7	SNRNP40	Homo sapiens	U5 small nuclear ribonucleoprotein 40 kDa protein	3256.63	4517.24	3355.33	2535.14	1646.71	2031.29	3671.32	1302.69	4492.81
Q96EY5	MVB12A	Homo sapiens	Multivesicular body subunit 12A	3583.15	5190.14	4843.29	8981.55	10184.3	8623.58	3505.62	NaN	NaN
Q96F15	GIMAP5	Homo sapiens	GTPase IMAP family member 5	NaN	NaN	NaN	1.14017	NaN	NaN	NaN	321.689	NaN
Q96FV9	THOC1	Homo sapiens	THO complex subunit 1	3137.58	2688.43	1261.7	1692.7	1175.42	2544.51	7932.16	1759.65	2387.84
Q96FW1	OTUB1	Homo sapiens	Ubiquitin thioesterase OTUB1	3944.67	4121.21	3394.23	3791.28	3668.46	3300.99	4276.54	4310.84	2072.31
Q96HW7	INTS4	Homo sapiens	Integrator complex subunit 4	800.8	2112.77	1806.7	1877.76	2618.93	2276.84	1933.27	4588.9	3522.36
Q96I24	FUBP3	Homo sapiens	Far upstream element-binding protein 3	1393.77	616.858	560.668	1457.21	2441.68	1293.57	1496.43	1891.92	2272.59
Q96IW7	SEC22A	Homo sapiens	Vesicle-trafficking protein SEC22a	241.7	769.09	1372.28	1.0061	NaN	0.919761	NaN	1.08438	1.18017
Q96IZ5	RBM41	Homo sapiens	RNA-binding protein 41	16213.7	11880.9	7832.72	16884.1	13653.9	15160.7	20547.4	24093.6	26913.5
Q96JB1	DNAH8	Homo sapiens	Dynein axonemal heavy chain 8	3814198	2.53261e+06	3.16072e+06	3.20673e+06	2.92077e+06	3.24421e+06	6.80352e+06	7116023	8174042
Q96JB3	HIC2	Homo sapiens	Hypermethylated in cancer 2 protein	10915.2	8674.93	7988.82	11808.4	12627.7	8007.63	8284.67	9286.66	12275.9
Q96JH7	VCPIP1	Homo sapiens	Deubiquitinating protein VCPIP1	1453.81	454.678	1178.43	1209.38	1095.1	NaN	2740.95	2177.24	1522.6
Q96JJ3	ELMO2	Homo sapiens	Engulfment and cell motility protein 2	2385.65	2592.98	2601.02	1012.1	1401.32	1186.6	878.359	1032	1577.91
Q96JK2	DCAF5	Homo sapiens	DDB1- and CUL4-associated factor 5	3975.02	3972.04	2087.66	2606.69	3715.26	4102.98	7986.73	7913.13	10248.7
Q96K37	SLC35E1	Homo sapiens	Solute carrier family 35 member E1	5902.49	3219.1	3986.26	2846.18	3160.36	2078.28	5562.67	3485.91	5690.51
Q96KP4	CNDP2	Homo sapiens	Cytosolic non-specific dipeptidase	24951.9	26363.9	26710.8	28599.2	27976.3	28033.9	44629	41560.2	40892.3
Q96L92	SNX27	Homo sapiens	Sorting nexin-27	1596.51	1411.88	1709.07	2395.25	1106.95	1133.55	4035.91	5503.95	6956.65
Q96ME1	FBXL18	Homo sapiens	F-box/LRR-repeat protein 18	63534.4	17873.6	17004.8	24987.1	18457.1	10617.8	23221.2	24313.6	13734.4
Q96MX0	CMTM3	Homo sapiens	CKLF-like MARVEL transmembrane domain-containing protein 3	10025.1	11557.6	10171.6	12839.2	6101.24	5011.28	10105.8	9508.28	11908.6
Q96NU7	AMDHD1	Homo sapiens	Probable imidazolonepropionase	2647.78	3173.52	2949.51	2993.68	2614.93	2809.11	3500.6	4751.68	6101.74
Q96PP9	GBP4	Homo sapiens	Guanylate-binding protein 4	NaN	NaN	NaN	NaN	NaN	NaN	1455.52	1024.14	1.30232
Q96PU5	NEDD4L	Homo sapiens	E3 ubiquitin-protein ligase NEDD4-like	410.988	359.559	1008.66	2319.64	2871.18	2904.83	1131.33	850.436	1292.54
Q96QD8	SLC38A2	Homo sapiens	Sodium-coupled neutral amino acid transporter 2	14917.8	16198.8	15108	27189.4	23927.4	28514.5	32165.6	42371.8	39272.2
Q96QE2	SLC2A13	Homo sapiens	Proton myo-inositol cotransporter	657.693	973.849	1371.33	1099.12	1370.23	1520.91	1475.22	1797.36	2495.49
Q96QK1	VPS35	Homo sapiens	Vacuolar protein sorting-associated protein 35	9679.75	10002.4	10127.8	9667.25	7227.65	9631.09	8094.55	9090.75	10874.4
Q96QU1	PCDH15	Homo sapiens	Protocadherin-15	269.524	183.841	NaN	1059.76	162.641	631.035	955.539	NaN	0.94624
Q96RD1	OR6C1	Homo sapiens	Olfactory receptor 6C1	1.01125	NaN	3295.25	839.153	4371.87	633.231	5022.92	5458.54	3.58265
Q96RF0	SNX18	Homo sapiens	Sorting nexin-18	2204.53	2028.58	2199.95	1925.03	2109.37	2553.41	1709.94	2040.72	1808.63
Q96RQ9	IL4I1	Homo sapiens	L-amino-acid oxidase	6208.59	6624.32	2810.76	13253.5	12592.9	13635.9	2117.37	3450.03	15.9939
Q96SB4	SRPK1	Homo sapiens	SRSF protein kinase 1	797.389	963	835.529	596.31	1145.87	112.989	NaN	NaN	NaN
Q96SI9	STRBP	Homo sapiens	Spermatid perinuclear RNA-binding protein	7899.6	581.326	2662.36	1.1764	1977.15	424.027	3431.37	12885.6	1.2872
Q96TA1	NIBAN2	Homo sapiens	Protein Niban 2	46156	40869.2	41209.7	30109.2	31325.5	28991.7	22502.6	11878.8	19241.1
Q99435	NELL2	Homo sapiens	Protein kinase C-binding protein NELL2	3513.91	2690.64	1235.95	4027.13	5393.87	3879.73	5341.66	4363.47	5172
Q99447	PCYT2	Homo sapiens	Ethanolamine-phosphate cytidylyltransferase	3237.85	8100.22	12274.3	816.502	2190.44	2509.04	1032.87	3065.01	4222.2
Q99460	PSMD1	Homo sapiens	26S proteasome non-ATPase regulatory subunit 1	27530.2	30956	29800.5	31701.1	29410.9	29536	18614.7	20400.4	20644.4
Q99497	PARK7	Homo sapiens	Parkinson disease protein 7	24901.1	25580.1	26805.6	26760.2	24483.5	26019.8	42200.3	30001	35433
Q99536	VAT1	Homo sapiens	Synaptic vesicle membrane protein VAT-1 homolog	22198.3	19940	22134.7	14038.6	15451.3	13786.5	8958.92	11712.8	8675.44
Q99541	PLIN2	Homo sapiens	Perilipin-2	NaN	2.30335	2457.24	274.797	208.879	2.06398	4096.28	2478.14	3570.61
Q99543	DNAJC2	Homo sapiens	DnaJ homolog subfamily C member 2	322.288	NaN	1.23084	2.50445	1.17685	167.958	2.71651	2.35615	1506.39
Q99571	P2RX4	Homo sapiens	P2X purinoceptor 4	6126.9	5322.19	6351.37	8415.31	7130.9	7193.77	15859.1	15183.9	13753.3
Q99627	COPS8	Homo sapiens	COP9 signalosome complex subunit 8	14550.8	32303.7	11866.9	48253.1	32229.6	35358.3	19387	8519.1	268.758
Q99683	MAP3K5	Homo sapiens	Mitogen-activated protein kinase kinase kinase 5	52886.1	6392.93	NaN	3598.01	358.213	NaN	811.663	NaN	1.94444
Q99798	ACO2	Homo sapiens	Aconitate hydratase, mitochondrial	3441.55	2623.48	4464.88	1420.41	3059.61	2410.57	6050.29	4769.71	6877.81
Q99805	TM9SF2	Homo sapiens	Transmembrane 9 superfamily member 2	2195.65	2918.73	1554.09	3650.7	1909.83	1950.12	8265.68	4119.36	6178.92
Q99816	TSG101	Homo sapiens	Tumor susceptibility gene 101 protein	11680.9	11317.7	10745	20485.1	20472	17165.2	17188.1	18441.4	15421.5
Q99829	CPNE1	Homo sapiens	Copine-1	28747.4	33595.2	26386	6156.7	7650.89	9775.01	4352.81	4952.83	4274.91
Q99832	CCT7	Homo sapiens	T-complex protein 1 subunit eta	37582.2	34705.3	36398.7	39459.5	39782.2	37131.3	19591	18150.5	19716.6
Q99873	PRMT1	Homo sapiens	Protein arginine N-methyltransferase 1	10057.3	11474.8	9810.15	9953.18	8501.61	9634.53	7400.23	9872.06	9766.17
Q99961;Q99962	SH3GL1;SH3GL2	Homo sapiens	Endophilin-A2;Endophilin-A1	4902.94	2152.68	3660.8	2943.68	5599.17	2433.74	2348.03	NaN	1749.77
Q99973	TEP1	Homo sapiens	Telomerase protein component 1	446.185	188.557	NaN	3023.89	2996.11	3587.14	2682.75	3208.14	2281.78
Q9BQA1	WDR77	Homo sapiens	Methylosome protein 50	30005.7	26022.2	26240.1	36186.8	33403.1	32419.7	18609.8	18509.7	20869.1
Q9BQE3	TUBA1C	Homo sapiens	Tubulin alpha-1C chain	30457.6	15431.8	26651.1	18907.7	27352.3	8543.03	22950.5	17669.7	14141.8
Q9BQE5	APOL2	Homo sapiens	Apolipoprotein L2	3029.67	2540.85	3316.6	2073.69	3213	924.823	6255.04	7223.63	5149.69
Q9BR76	CORO1B	Homo sapiens	Coronin-1B	55473.2	12232.1	32239	16078.7	3690.12	32384.1	1200.29	10154.2	12153.3
Q9BRA2	TXNDC17	Homo sapiens	Thioredoxin domain-containing protein 17	2795.39	5305.72	5176.07	3671.54	4071.43	6149.05	9178.17	11723.5	8663.24
Q9BRF8	CPPED1	Homo sapiens	Serine/threonine-protein phosphatase CPPED1	10809.6	11791.6	12087.4	16398.9	16682.8	14805.9	13365.2	13171.2	11046.2
Q9BRQ4	CFAP300	Homo sapiens	Cilia- and flagella-associated protein 300	5202.46	4965.76	6536.44	5003.98	6221.09	6037.52	12202.7	11941.1	1866.39
Q9BS26	ERP44	Homo sapiens	Endoplasmic reticulum resident protein 44	7895.95	6359.24	4908.85	6420.17	4610.98	5471.11	15440.5	14737.3	9971.26
Q9BSJ2	TUBGCP2	Homo sapiens	Gamma-tubulin complex component 2	3307.76	2643.23	2975.39	4761.94	1567.44	2258.68	3248.71	4353.37	9997.25
Q9BT78	COPS4	Homo sapiens	COP9 signalosome complex subunit 4	3135.15	1401.78	2597.67	5350.68	4652.97	2874.98	9546.93	3237.72	2061.22
Q9BTU6	PI4K2A	Homo sapiens	Phosphatidylinositol 4-kinase type 2-alpha	5305.24	6342.77	7755.54	9072.7	7868.32	7137.83	25189.9	27626.4	29719.8
Q9BUF5	TUBB6	Homo sapiens	Tubulin beta-6 chain	2415.59	2841.41	3079.49	1176.04	3781.18	2139.56	1044.15	NaN	1024.74
Q9BV40	VAMP8	Homo sapiens	Vesicle-associated membrane protein 8	7479.68	9778.42	6352.35	5224.75	3171.94	6064	15823.8	14853.2	18304.2
Q9BVK6	TMED9	Homo sapiens	Transmembrane emp24 domain-containing protein 9	2759.78	4396.5	2309.28	484.899	3223.06	4169.89	14713.8	9261.43	11368.6
Q9BX10	GTPBP2	Homo sapiens	GTP-binding protein 2	NaN	396.629	NaN	NaN	224.759	NaN	1034.75	1061.14	584.924
Q9BXJ9	NAA15	Homo sapiens	N-alpha-acetyltransferase 15, NatA auxiliary subunit	5207.51	7313.18	6439.82	3184.77	4978.14	4717.41	3170.58	2863.96	5118.27
Q9BXP5	SRRT	Homo sapiens	Serrate RNA effector molecule homolog	2100.17	1691.7	3508.48	2377.37	2872.96	1506.71	3471.26	4231.96	3204.67
Q9BXR0	QTRT1	Homo sapiens	Queuine tRNA-ribosyltransferase catalytic subunit 1	4162.27	5088.67	4265.35	3027.17	4486.38	3046.33	2243.51	1195.36	3704.79
Q9BXS4	TMEM59	Homo sapiens	Transmembrane protein 59	1910.1	3671.76	2320.7	5190.31	6901.6	5525.31	16310.4	10581.4	6476.39
Q9BXX0	EMILIN2	Homo sapiens	EMILIN-2	8415.67	11150.4	8097.85	39698.5	42083.2	43789	12089.7	11184.9	10931.4
Q9BY44	EIF2A	Homo sapiens	Eukaryotic translation initiation factor 2A	5203.06	5917.03	5953.23	3919.28	4108.74	4182.11	5042.9	5522.23	4943.06
Q9BY67	CADM1	Homo sapiens	Cell adhesion molecule 1	1540.52	1094.2	1216.55	2164.06	3577.93	2917.91	5752.44	3933.37	5739.74
Q9BYK8	HELZ2	Homo sapiens	Helicase with zinc finger domain 2	1145.78	1401.26	776.599	416.663	364.997	360.454	11237.6	10512.8	11819.6
Q9BYX4	IFIH1	Homo sapiens	Interferon-induced helicase C domain-containing protein 1	1960.14	649.476	2072.97	1921.36	1158.33	1113.47	1517.15	1594.26	1332.58
Q9BZP6	CHIA	Homo sapiens	Acidic mammalian chitinase	46656.4	52329	60910.7	76115.3	64690.2	81721.2	104420	101727	91156.2
Q9C0E8	LNPK	Homo sapiens	Endoplasmic reticulum junction formation protein lunapark	4468.41	4528.94	5755.72	1941.07	1498.99	1792.68	1633.26	1190.54	1334.83
Q9C0F0	ASXL3	Homo sapiens	Putative Polycomb group protein ASXL3	NaN	NaN	246.068	1	NaN	NaN	NaN	NaN	0.812475
Q9C0H2	TTYH3	Homo sapiens	Protein tweety homolog 3	3670.17	3766.52	4687.4	5501.68	6155.77	5633.85	2380.32	3299.51	4478.98
Q9C0K1	SLC39A8	Homo sapiens	Metal cation symporter ZIP8	1.05795	1775.72	145.27	17186.7	1894.53	NaN	190.922	4884.69	209.772
Q9GZY6	LAT2	Homo sapiens	Linker for activation of T-cells family member 2	2443.14	3761.12	3552.05	1219.02	1634.22	1025.01	930.674	2433.88	2097.81
Q9H0D6	XRN2	Homo sapiens	5'-3' exoribonuclease 2	6666.42	6611.17	5380.09	4807.18	7008.49	4594.45	6232.33	1180.62	4896.7
Q9H0E2	TOLLIP	Homo sapiens	Toll-interacting protein	10848.7	11944.8	10623.6	8469.58	10541.5	5031.99	9099.56	4377.36	9388.14
Q9H0U4	RAB1B	Homo sapiens	Ras-related protein Rab-1B	7765.63	10463.2	9540.82	7059.08	11107.1	10499.9	8493.06	10263.1	10259.5
Q9H0W9	C11orf54	Homo sapiens	Ester hydrolase C11orf54	1365.73	2544.48	1464.67	9408.31	4265.06	3322.57	1439.44	1203.38	1362.39
Q9H223	EHD4	Homo sapiens	EH domain-containing protein 4	11736.1	12343.9	11205.1	7220.51	5307.85	4057.06	11401.1	11883	13231.6
Q9H257	CARD9	Homo sapiens	Caspase recruitment domain-containing protein 9	16314.2	16990.7	15670.5	31762.5	16588	14042.9	10452.3	20141.8	9916.59
Q9H269	VPS16	Homo sapiens	Vacuolar protein sorting-associated protein 16 homolog	3752.94	5317.28	4578.36	3337.35	5176.81	3174.33	NaN	3366.9	3593.53
Q9H299	SH3BGRL3	Homo sapiens	SH3 domain-binding glutamic acid-rich-like protein 3	7544.28	8785.35	7662.72	7141.74	8528.23	6450.14	7562.1	10327.1	8565.57
Q9H2M3	BHMT2	Homo sapiens	S-methylmethionine--homocysteine S-methyltransferase BHMT2	4197.94	6837.43	4870.43	8817.09	8294.5	11394.1	797.964	NaN	NaN
Q9H3P7	ACBD3	Homo sapiens	Golgi resident protein GCP60	1831.38	2431.54	2150.52	1643.21	417.195	460.127	2475.44	1517.47	2806
Q9H3S7	PTPN23	Homo sapiens	Tyrosine-protein phosphatase non-receptor type 23	4378.43	3761.05	2455.39	13352.2	3668.25	3166.08	4818.31	4065.66	5916.05
Q9H410	DSN1	Homo sapiens	Kinetochore-associated protein DSN1 homolog	813.699	NaN	3259.5	1596.85	1997.39	2612.71	1796.14	821.904	5514.53
Q9H444	CHMP4B	Homo sapiens	Charged multivesicular body protein 4b	4710.35	4376.18	5388.47	7454.03	5670.55	6090.49	5841.25	5661.95	7486.68
Q9H497	TOR3A	Homo sapiens	Torsin-3A	NaN	NaN	NaN	2.12574	NaN	1	0.90589	NaN	1.66275
Q9H4A4	RNPEP	Homo sapiens	Aminopeptidase B	7786.9	6987.54	8332.97	2420.16	3390.97	4561.27	4306.23	6003.19	10133.8
Q9H4B7	TUBB1	Homo sapiens	Tubulin beta-1 chain	1970.06	2885.86	2855.3	1873.44	5688.69	4309.18	1360.24	1190.93	2884.42
Q9H4G4	GLIPR2	Homo sapiens	Golgi-associated plant pathogenesis-related protein 1	16891.3	17487.8	21085.8	297.63	4269.65	3026.76	4608.93	2418.89	2741.13
Q9H4M9	EHD1	Homo sapiens	EH domain-containing protein 1	21975.8	23216.9	21770.5	19866.3	18778.6	18432.3	15201.8	13358.9	14888.7
Q9H7D7	WDR26	Homo sapiens	WD repeat-containing protein 26	2091.24	1748.48	2862.7	1994.24	330.371	3429.62	NaN	1388.34	1041.8
Q9H7F0	ATP13A3	Homo sapiens	Polyamine-transporting ATPase 13A3	2957.09	4041.42	3607.66	4838.35	6496.96	4953.72	4601.6	5972.45	6323.15
Q9H9Q2	COPS7B	Homo sapiens	COP9 signalosome complex subunit 7b	1898.5	1299.61	1464.42	1979.74	1777.41	1725.82	276.477	308.837	943.048
Q9HAV0	GNB4	Homo sapiens	Guanine nucleotide-binding protein subunit beta-4	8541.9	7698.13	7061.02	8038.33	7142.15	6647.77	4971.39	8020.4	10397.4
Q9HB71	CACYBP	Homo sapiens	Calcyclin-binding protein	5333.49	4504.38	1631.8	2273.99	1960.85	1971.97	4351.16	8324.35	9564.88
Q9HC07	TMEM165	Homo sapiens	Transmembrane protein 165	5151.72	5182.13	6523.75	4255.54	2491.35	3344.25	5408.56	3366.74	2596.04
Q9HC35	EML4	Homo sapiens	Echinoderm microtubule-associated protein-like 4	780.976	2364.94	1135.95	149.928	NaN	NaN	154.414	241.48	293.235
Q9HD67	MYO10	Homo sapiens	Unconventional myosin-X	NaN	914.392	NaN	712.005	NaN	1.01025	1973.98	1878.06	5185.8
Q9NP61	ARFGAP3	Homo sapiens	ADP-ribosylation factor GTPase-activating protein 3	4034.01	4209.35	3968.04	4746.73	3920.91	4632.93	708.799	2102.21	2039.04
Q9NP79	VTA1	Homo sapiens	Vacuolar protein sorting-associated protein VTA1 homolog	60492.8	71202.5	53621	142949	59071.7	66513.8	67326.4	81130.8	206047
Q9NPD3	EXOSC4	Homo sapiens	Exosome complex component RRP41	5937.07	6766.2	3563.15	8132.19	4981.89	5845.5	4754.39	3263.93	5580.37
Q9NPF4	OSGEP	Homo sapiens	Probable tRNA N6-adenosine threonylcarbamoyltransferase	4120.58	1895.83	3193.32	2908.85	2672.84	2032.41	2917.82	621.173	1250.4
Q9NQ25	SLAMF7	Homo sapiens	SLAM family member 7	6745.25	6561.59	6157.93	14353.7	14027.5	13917.7	59132.4	59711	51968.9
Q9NQ79	CRTAC1	Homo sapiens	Cartilage acidic protein 1	1574.99	3717.26	2743.05	2015.72	3855.79	3452.92	4329.57	7951.15	4554.94
Q9NQC3	RTN4	Homo sapiens	Reticulon-4	39821.8	41519.5	35656.1	51019.1	34807.1	29844	43921.7	40557.8	72919.4
Q9NQW7	XPNPEP1	Homo sapiens	Xaa-Pro aminopeptidase 1	7427.75	7833.92	7631.31	10038.9	3803.84	5097.78	5615.11	5109.39	5373.87
Q9NQX7	ITM2C	Homo sapiens	Integral membrane protein 2C	2922.72	1157.89	2167.87	2809.26	4481.07	5816.77	2922.98	1733.96	3001.72
Q9NQZ7	ENTPD7	Homo sapiens	Ectonucleoside triphosphate diphosphohydrolase 7	2.20396	1.32384	195.581	2.04001	1.20762	NaN	2.33164	1119.53	2.40859
Q9NR09	BIRC6	Homo sapiens	Baculoviral IAP repeat-containing protein 6	4001.01	3901.39	3843.04	3332.64	1918.23	2336.21	4062.73	2860.51	1688.74
Q9NR30	DDX21	Homo sapiens	Nucleolar RNA helicase 2	4135.21	4364.7	4458.35	5392.19	4921.96	4202.26	2989.63	2863.27	1129.91
Q9NR31	SAR1A	Homo sapiens	GTP-binding protein SAR1a	2904.51	1137.31	2395.55	1470.52	269.733	1851.43	2071.19	NaN	3568.29
Q9NR45	NANS	Homo sapiens	Sialic acid synthase	21674.1	20185.4	19992	16116.1	14151.5	16211	18100.6	18475.7	19707.3
Q9NRN7	AASDHPPT	Homo sapiens	L-aminoadipate-semialdehyde dehydrogenase-phosphopantetheinyl transferase	1065.94	2736.23	2331.15	2711.99	842.415	2925.82	839.976	1848.18	701.424
Q9NRX5	SERINC1	Homo sapiens	Serine incorporator 1	3238.15	2619.59	4039.86	6159.25	5678.15	6302.68	11901.3	8982.86	6058.69
Q9NSD9	FARSB	Homo sapiens	Phenylalanine--tRNA ligase beta subunit	7542.84	5860.06	6336.49	8195.07	6186.23	6413.28	1786.85	3232.76	NaN
Q9NSE4	IARS2	Homo sapiens	Isoleucine--tRNA ligase, mitochondrial	6006.18	6287.32	6917.12	3035.61	3354.57	1763.39	6848.55	9939.47	7817.94
Q9NSI6	BRWD1	Homo sapiens	Bromodomain and WD repeat-containing protein 1	30577.4	6198.77	24324.5	23077.9	37781.8	20867.8	1.20461	2518.79	1.60524
Q9NT62	ATG3	Homo sapiens	Ubiquitin-like-conjugating enzyme ATG3	4737.47	6149.78	5000.74	2428.99	3967.46	2756.85	5842.3	4544.85	5619.87
Q9NTJ5	SACM1L	Homo sapiens	Phosphatidylinositol-3-phosphatase SAC1	7753.33	5507.93	8232.62	5848.18	5811.34	5123.07	10036.8	11926.5	12254.1
Q9NTU7	CBLN4	Homo sapiens	Cerebellin-4	5554.89	4850.8	4808.16	5848.39	4501.78	6207.83	6516.51	7317.93	4524.25
Q9NU53	GINM1	Homo sapiens	Glycoprotein integral membrane protein 1	225.936	489.587	184.71	546.3	541.415	1833.32	2594.89	2567.02	3082.65
Q9NUN5	LMBRD1	Homo sapiens	Lysosomal cobalamin transport escort protein LMBD1	3900.94	3385.81	2936.36	3581.69	2817.77	4504.69	3029.74	5145.11	3520.13
Q9NV92	NDFIP2	Homo sapiens	NEDD4 family-interacting protein 2	NaN	619.953	NaN	NaN	1176.21	334.175	1922.77	4870.58	4747
Q9NVA2	SEPTIN11	Homo sapiens	Septin-11	6508.54	6673.39	5848.96	5286.86	6141.27	4830.6	9434.97	5026.1	5633.37
Q9NVJ2	ARL8B	Homo sapiens	ADP-ribosylation factor-like protein 8B	41100.3	44436.3	46646	32708.8	30202.1	40885.2	58287.6	68236	62682.5
Q9NVS9	PNPO	Homo sapiens	Pyridoxine-5'-phosphate oxidase	1505.66	1210.18	2651.84	2166.6	2315.58	955.505	1504.41	2059.77	1037.33
Q9NXN4	GDAP2	Homo sapiens	Ganglioside-induced differentiation-associated protein 2	2072.23	1215.28	1713.21	NaN	155.782	NaN	790.583	2020.7	679.713
Q9NY27	PPP4R2	Homo sapiens	Serine/threonine-protein phosphatase 4 regulatory subunit 2	71400.2	63292.3	94667	138557	192853	81012.6	239165	87247.6	91515.9
Q9NY33	DPP3	Homo sapiens	Dipeptidyl peptidase 3	6581.48	7630.44	6150.98	6701.46	4985.39	6687.9	7844.72	6832.41	6746.98
Q9NY65	TUBA8	Homo sapiens	Tubulin alpha-8 chain	42732	47275.7	37336	51539.2	19257.3	39641.3	14686.2	18906.1	25656.3
Q9NYF3	FAM53C	Homo sapiens	Protein FAM53C	23458.7	18095.6	21812.3	40744.3	23893.3	30477.4	35672.2	30741.9	31818.4
Q9NYF5	FAM13B	Homo sapiens	Protein FAM13B	3876.56	8186.3	5477.72	3196.52	8426.33	6766.04	9206.29	10620.4	7566.5
Q9NZL9	MAT2B	Homo sapiens	Methionine adenosyltransferase 2 subunit beta	3496.91	3120.26	1983.27	1567.19	1594.79	2335.89	3526.24	3085.22	3083.24
Q9NZM1	MYOF	Homo sapiens	Myoferlin	5028.24	6177.22	4966.23	5436.86	5894.2	4676.04	3478.87	5764.59	4085.99
Q9NZT1	CALML5	Homo sapiens	Calmodulin-like protein 5	17676.9	10140.6	9918.41	7713.51	6515.43	9681.85	65616.9	8019.67	9721.02
Q9P0J7	KCMF1	Homo sapiens	E3 ubiquitin-protein ligase KCMF1	658.846	740.092	835.076	304.44	NaN	371.445	NaN	NaN	2.08972
Q9P0V8	SLAMF8	Homo sapiens	SLAM family member 8	2101.01	5221.65	1708.79	4696.8	7719.1	6498.02	11995.6	12170.3	11025.5
Q9P212	PLCE1	Homo sapiens	1-phosphatidylinositol 4,5-bisphosphate phosphodiesterase epsilon-1	2119.83	12032	8044.18	1.56906	NaN	2469.06	3952.72	NaN	NaN
Q9P253	VPS18	Homo sapiens	Vacuolar protein sorting-associated protein 18 homolog	3735.08	4196.43	3595.24	2585.15	2214.1	4027.86	6868.93	4999.16	5844.71
Q9P258	RCC2	Homo sapiens	Protein RCC2	5154.12	4684.96	4930.81	3611.37	3772.32	4476.2	29.3214	2324.9	443.429
Q9P265	DIP2B	Homo sapiens	Disco-interacting protein 2 homolog B	4128.06	4064.62	5605.79	15342.2	10953.3	9354.27	5105.55	3658.07	4104.73
Q9P2E5	CHPF2	Homo sapiens	Chondroitin sulfate glucuronyltransferase	417.078	1326.54	1302.4	1511.78	518.618	1584.46	1240.76	924.504	NaN
Q9P2I0	CPSF2	Homo sapiens	Cleavage and polyadenylation specificity factor subunit 2	2476.56	1856.35	1648.26	642.85	1828.76	1086.41	2236.46	1504.99	1285.84
Q9P2J5	LARS1	Homo sapiens	Leucine--tRNA ligase, cytoplasmic	40208	41071.1	37278.2	30951.8	25726.1	26203.9	26947.1	27930.2	31504.3
Q9P2R3	ANKFY1	Homo sapiens	Rabankyrin-5	1056.05	1265.7	1975.92	1388.44	2165.21	1989.57	5550.95	6007.56	4477.21
Q9UBG0	MRC2	Homo sapiens	C-type mannose receptor 2	12392.5	12471.2	11148.2	15519.9	12846.4	15264.1	19733.5	21094.4	20515.9
Q9UBP4	DKK3	Homo sapiens	Dickkopf-related protein 3	NaN	3554.93	2464.44	7574.4	3815.43	3226.46	3340.41	2987.4	6997.44
Q9UBQ0	VPS29	Homo sapiens	Vacuolar protein sorting-associated protein 29	7931.57	5987.39	6838.35	5745.38	4292.33	5195.87	6702.32	6128.7	5563.5
Q9UBQ5	EIF3K	Homo sapiens	Eukaryotic translation initiation factor 3 subunit K	4320.09	2507.03	5873.11	1340.59	2391.26	2352.01	2905.97	635.969	1407.32
Q9UBQ7	GRHPR	Homo sapiens	Glyoxylate reductase/hydroxypyruvate reductase	2014.77	2448.72	1497.9	397.226	694.309	1426.65	998.67	1731.59	1690.86
Q9UBR1	UPB1	Homo sapiens	Beta-ureidopropionase	1736.9	2824.26	1888.37	1424.45	2111.31	1232.02	3135.67	2815.14	3518.36
Q9UBR2	CTSZ	Homo sapiens	Cathepsin Z	26829.6	25290.8	18277.7	36509.2	35703.4	38954	23581.8	20129.1	20880.1
Q9UBT2	UBA2	Homo sapiens	SUMO-activating enzyme subunit 2	4635.86	4842.68	4119.5	2345.65	3422.47	3822.76	2772.5	2284.48	2105.94
Q9UH65	SWAP70	Homo sapiens	Switch-associated protein 70	476.268	3828.83	578.419	3619.93	8049.6	8223.51	6592.83	6305.85	3122.09
Q9UHB9	SRP68	Homo sapiens	Signal recognition particle subunit SRP68	3244.48	2919.1	2238.9	1229.81	2448.25	1156.94	415.966	2335.11	9.88881
Q9UHD1	CHORDC1	Homo sapiens	Cysteine and histidine-rich domain-containing protein 1	1057.52	3675.08	1530.03	3206.31	969.997	1.95213	1785.27	2958.96	2374.66
Q9UHD8	SEPTIN9	Homo sapiens	Septin-9	4386.71	4175.19	4850.45	3901.84	4840.13	4234.82	2791.01	3512.15	3094.74
Q9UHX1	PUF60	Homo sapiens	Poly(U)-binding-splicing factor PUF60	337464	113678	102502	91634.8	139606	113063	115459	125676	78184.1
Q9UHY1	NRBP1	Homo sapiens	Nuclear receptor-binding protein	10550.2	9854.99	10392.9	12052.7	9813.99	9883.22	17522.7	16629	16032.5
Q9UI10	EIF2B4	Homo sapiens	Translation initiation factor eIF-2B subunit delta	3912.73	5069.56	3708.8	6576.02	6182.13	4718.82	1521.04	NaN	431.877
Q9UI12	ATP6V1H	Homo sapiens	V-type proton ATPase subunit H	1866.11	1321.4	2890.41	740.242	2518.69	994.795	2378.99	2248.24	NaN
Q9UJ70	NAGK	Homo sapiens	N-acetyl-D-glucosamine kinase	8661.75	9040.06	8768.83	7139.28	7105.68	5143.85	21517.3	18493.1	19083
Q9UKK3	PARP4	Homo sapiens	Protein mono-ADP-ribosyltransferase PARP4	5334.22	5121.56	4308.25	39529.8	33229.3	34659.7	22798.7	27043.3	30650.3
Q9UKK9	NUDT5	Homo sapiens	ADP-sugar pyrophosphatase	877.623	1226.44	1115.87	2308.17	2280.33	2043.21	NaN	NaN	NaN
Q9UKU9	ANGPTL2	Homo sapiens	Angiopoietin-related protein 2	2410.7	1353.53	1407.78	2018.09	1854.61	2579.78	2947.38	2416.03	1794.65
Q9UL25	RAB21	Homo sapiens	Ras-related protein Rab-21	8018.88	8645.34	6224.24	6631.25	11336.7	9788.85	17160.6	21057.6	26986.1
Q9UL26	RAB22A	Homo sapiens	Ras-related protein Rab-22A	2649.46	2377.08	3332.75	3469.04	2350.53	3528.5	9007.25	9735.31	7364.48
Q9ULH0	KIDINS220	Homo sapiens	Kinase D-interacting substrate of 220 kDa	NaN	NaN	NaN	830.092	679.694	333.565	2237.18	2718.97	2879.1
Q9ULH1	ASAP1	Homo sapiens	Arf-GAP with SH3 domain, ANK repeat and PH domain-containing protein 1	4138.11	3402.23	1360.05	2290.95	2000.45	2620.53	1565.5	2663.21	1856.67
Q9ULV4	CORO1C	Homo sapiens	Coronin-1C	3564.85	3046.88	3249.09	3689.13	4076.44	2935.28	5421.75	5043.06	5167.05
Q9UM47	NOTCH3	Homo sapiens	Neurogenic locus notch homolog protein 3	NaN	592.364	NaN	121.858	455.049	981.298	1.02889	NaN	143.956
Q9UM54	MYO6	Homo sapiens	Unconventional myosin-VI	3043.98	4194.14	3503.28	1071.09	1794.45	1723.2	2757	1111.84	845.735
Q9UMS4	PRPF19	Homo sapiens	Pre-mRNA-processing factor 19	19685.3	18783.7	18720	18597.5	14114	14859.9	21270.8	22842.7	26841.3
Q9UN66	PCDHB8	Homo sapiens	Protocadherin beta-8	4.68378	1	NaN	NaN	NaN	NaN	NaN	NaN	0.00363245
Q9UNF0	PACSIN2	Homo sapiens	Protein kinase C and casein kinase substrate in neurons protein 2	8.58998	6.96202	NaN	NaN	NaN	NaN	0.0101542	1.9534	0.0163346
Q9UNF1	MAGED2	Homo sapiens	Melanoma-associated antigen D2	3925.92	4721.63	4469.02	3913.31	3885.11	3112.7	10133.4	7029.85	11989.6
Q9UNH7	SNX6	Homo sapiens	Sorting nexin-6	1488.77	982.167	1855.47	200.803	441.48	1593.83	2644	1327.48	NaN
Q9UNM6	PSMD13	Homo sapiens	26S proteasome non-ATPase regulatory subunit 13	86319.8	94303.1	95517	94497.3	76070	96089.7	84924.3	94837.2	80301.6
Q9UNS2	COPS3	Homo sapiens	COP9 signalosome complex subunit 3	NaN	NaN	NaN	0.944738	NaN	NaN	1.24611	1	1.00955
Q9UPU5	USP24	Homo sapiens	Ubiquitin carboxyl-terminal hydrolase 24	NaN	1598.33	1040.12	986.966	1476.37	1105.25	NaN	1585.73	NaN
Q9UPY5	SLC7A11	Homo sapiens	Cystine/glutamate transporter	7112.57	5034.32	7943.39	7001.58	11092.2	5339.16	5229.83	7068.13	7819.82
Q9UQ35	SRRM2	Homo sapiens	Serine/arginine repetitive matrix protein 2	1190.42	308.977	1708.87	619.178	387.071	NaN	8962.36	12918.8	9349.42
Q9UQ80	PA2G4	Homo sapiens	Proliferation-associated protein 2G4	3752.74	2653.59	2681.1	2267.91	1549.09	3434.58	2288.87	1307.55	716.816
Q9Y223	GNE	Homo sapiens	Bifunctional UDP-N-acetylglucosamine 2-epimerase/N-acetylmannosamine kinase	1713.17	1368.74	909.6	1268.25	783.312	1772.95	1820.45	2076.45	1973.08
Q9Y230	RUVBL2	Homo sapiens	RuvB-like 2	41120.5	39343.4	38981.6	29939	31729.6	29684.7	19147.5	20221.5	23626
Q9Y262	EIF3L	Homo sapiens	Eukaryotic translation initiation factor 3 subunit L	24124.4	29282.3	25837.1	24782.3	24783.4	25961.9	15951.8	13319.6	16776.2
Q9Y263	PLAA	Homo sapiens	Phospholipase A-2-activating protein	3745.87	5876.71	2957.83	4642.09	1450.92	2866.13	2413.09	3264.87	3974.9
Q9Y265	RUVBL1	Homo sapiens	RuvB-like 1	24770.8	26046	25780.6	21151.6	19535.6	19720.2	12688.1	14231.1	13886.4
Q9Y285	FARSA	Homo sapiens	Phenylalanine--tRNA ligase alpha subunit	10975	12667.7	12271.8	9914.69	10667.2	9787.1	9891.47	10988.3	13726.5
Q9Y287	ITM2B	Homo sapiens	Integral membrane protein 2B	8710.57	8791.29	9534.23	11649.6	8930.82	12901.6	25481.8	21746.1	25859.8
Q9Y2L5	TRAPPC8	Homo sapiens	Trafficking protein particle complex subunit 8	1895.24	2530.68	1328.77	NaN	1877.53	365.328	NaN	893.269	NaN
Q9Y2L9	LRCH1	Homo sapiens	Leucine-rich repeat and calponin homology domain-containing protein 1	1950.91	1714.18	1647.23	3230.46	3018.88	2587.44	981.997	NaN	847.774
Q9Y2S6	TMA7	Homo sapiens	Translation machinery-associated protein 7	NaN	NaN	463.943	NaN	NaN	NaN	NaN	364.064	NaN
Q9Y2W1	THRAP3	Homo sapiens	Thyroid hormone receptor-associated protein 3	2611.88	776.324	NaN	1277.62	1919.07	NaN	2131.13	5025.36	2731.35
Q9Y2X3	NOP58	Homo sapiens	Nucleolar protein 58	6485.99	8243.22	9885.41	2640.69	7700.4	6470.61	11869.9	10233.8	11204.5
Q9Y316	MEMO1	Homo sapiens	Protein MEMO1	5262	5170.45	7140.62	5692.93	5526.32	4833.44	5544.25	5536.97	7119.54
Q9Y333	LSM2	Homo sapiens	U6 snRNA-associated Sm-like protein LSm2	2157.28	1890.42	1172.64	1982.01	1829.32	1963.87	1005.88	1774.39	793.238
Q9Y3A5	SBDS	Homo sapiens	Ribosome maturation protein SBDS	366.668	905.877	1829.14	NaN	718.275	380.982	842.295	806.808	1079.78
Q9Y3F4	STRAP	Homo sapiens	Serine-threonine kinase receptor-associated protein	4104.4	3418.75	5653.44	2554.58	2167.69	2909.59	2190.89	5.94793	2055.75
Q9Y3I0	RTCB	Homo sapiens	RNA-splicing ligase RtcB homolog	7541.77	9602.02	8172.19	2976.33	4185.07	5892.59	5091.61	5882.93	3504.46
Q9Y3Z3	SAMHD1	Homo sapiens	Deoxynucleoside triphosphate triphosphohydrolase SAMHD1	3.01181	1847.17	1160.84	383.097	876.637	1150.63	4841.01	4215.96	6246.8
Q9Y490	TLN1	Homo sapiens	Talin-1	71064.4	72523.8	76623.7	56537.3	54950.4	56150	69950.5	70905.9	73656.3
Q9Y4K0	LOXL2	Homo sapiens	Lysyl oxidase homolog 2	331.193	NaN	NaN	NaN	NaN	NaN	1258.1	493.214	1254.37
Q9Y4L1	HYOU1	Homo sapiens	Hypoxia up-regulated protein 1	7883.04	8183.34	8757.32	6572.8	5525.44	6194.42	7893.85	6379.28	8547.65
Q9Y4P8	WIPI2	Homo sapiens	WD repeat domain phosphoinositide-interacting protein 2	0.994917	NaN	NaN	1.65434	629.174	NaN	1.15645	1.04327	1.51698
Q9Y561	LRP12	Homo sapiens	Low-density lipoprotein receptor-related protein 12	NaN	NaN	NaN	NaN	NaN	2139.28	9789.28	8718.96	6505.25
Q9Y570	PPME1	Homo sapiens	Protein phosphatase methylesterase 1	906.583	596.416	1200.29	1172.18	1448.45	1067.62	1.38467	931.681	3564.54
Q9Y5B9	SUPT16H	Homo sapiens	FACT complex subunit SPT16	NaN	206.841	518.527	206.854	NaN	152.079	2323.35	1632.67	1476.42
Q9Y5K5	UCHL5	Homo sapiens	Ubiquitin carboxyl-terminal hydrolase isozyme L5	1878.5	1886.87	2333.09	1922.26	2263.6	747.434	333.703	461.647	406.514
Q9Y5K6	CD2AP	Homo sapiens	CD2-associated protein	1.05025	460.05	1004.37	770.292	1077.03	1937.05	2220.57	2037.2	3328.39
Q9Y5K8	ATP6V1D	Homo sapiens	V-type proton ATPase subunit D	6171.7	9819.22	9709.67	525.481	2941.44	408.334	1868.26	1717.88	0.937022
Q9Y5W9	SNX11	Homo sapiens	Sorting nexin-11	NaN	NaN	NaN	NaN	1146.09	NaN	NaN	NaN	1267.26
Q9Y5X1	SNX9	Homo sapiens	Sorting nexin-9	2927.37	5811.88	4597.53	5311.63	5675.47	6458.14	NaN	NaN	452.199
Q9Y639	NPTN	Homo sapiens	Neuroplastin	616.759	1969.16	833.848	270.096	551.688	2219.85	7.53904	629.502	1266.78
Q9Y678	COPG1	Homo sapiens	Coatomer subunit gamma-1	24205.4	26170.2	27856.4	28168.9	27935.9	27226.8	35602.1	34273.2	34490.4
Q9Y6B7	AP4B1	Homo sapiens	AP-4 complex subunit beta-1	11537.8	15147.4	12966.9	14288.8	19177.5	17782.9	15713.5	20024.3	12133.5
Q9Y6G9	DYNC1LI1	Homo sapiens	Cytoplasmic dynein 1 light intermediate chain 1	24619	26805.5	28138.3	14936.7	19162.8	21041.1	18545.5	20230	22925.7
Q9Y6K5	OAS3	Homo sapiens	2'-5'-oligoadenylate synthase 3	445.111	1034.76	671.613	887.363	743.388	464.02	9835.28	9828.41	8305.28
Q9Y6M7	SLC4A7	Homo sapiens	Sodium bicarbonate cotransporter 3	654.567	2145.55	2139.58	5584.81	1603.31	2336.51	2779.25	2107.75	2037.09
Q9Y6N5	SQOR	Homo sapiens	Sulfide:quinone oxidoreductase, mitochondrial	14100.3	11747.1	11236.8	4478.51	4324.62	4518.32	27391.9	24245	29893.5
Q9Y6Y8	SEC23IP	Homo sapiens	SEC23-interacting protein	8526.36	9143.65	4812.8	8087.7	4967.7	6597.26	4972.19	7522.37	5312.12

## Sheet: Differential Proteins
UNIPROT	SYMBOL	p.value	logFC
A5YKK6	CNOT1	0.0398225	-0.202916
A6NI72	NCF1B	0.00149573	-1.63602
O00299	CLIC1	0.0361683	-0.261085
O00391	QSOX1	0.00927022	-2.18978
O00571	DDX3X	0.0119306	-1.50723
O00743	PPP6C	0.00703683	-1.7168
O00763	ACACB	0.011097	-0.944676
O14531	DPYSL4	0.00015714	-1.04578
O14744	PRMT5	0.044734	-0.358441
O14976	GAK	0.000459684	-12.5844
O15013	ARHGEF10	0.00354565	-14.7834
O43175	PHGDH	0.00290108	-1.41167
O43242	PSMD3	0.00660412	-0.831131
O43324	EEF1E1	0.0194321	-0.577705
O43488	AKR7A2	0.000119117	-13.0559
O43684	BUB3	0.00684887	-0.669676
O43776	NARS1	0.0115252	-1.71738
O43865	AHCYL1	0.0291955	-2.26607
O60462	NRP2	0.0150856	-1.76459
O60763	USO1	0.0300692	-0.516991
O75131	CPNE3	0.0073538	-0.99053
O75351	VPS4B	0.040681	-0.600446
O75369	FLNB	3.41577e-05	-2.07947
O75534	CSDE1	0.0198535	-0.919951
O75643	SNRNP200	0.00585399	-0.50692
O75832	PSMD10	0.0103131	-1.99837
O75915	ARL6IP5	0.00339413	-14.1848
O94979	SEC31A	0.0278867	-0.418681
O96019	ACTL6A	0.0076158	-0.383878
P00338	LDHA	0.00733446	-0.441446
P00742	F10	0.0177201	-0.599924
P00966	ASS1	0.000169601	-1.03538
P01031	C5	0.0225931	-0.915436
P01033	TIMP1	0.00845079	-3.20888
P01266	TG	0.000164373	-12.284
P01911	HLA-DRB1	0.000423826	-2.11564
P02647	APOA1	0.0240511	-0.764948
P02649	APOE	0.000926504	-1.21936
P02751	FN1	0.0397081	-0.0902195
P02753	RBP4	0.0494961	-1.41375
P02786	TFRC	0.000274416	-1.23186
P02787	TF	0.0371725	-0.544105
P03956	MMP1	0.000549358	-1.04508
P04075	ALDOA	0.00935457	-0.286809
P04083	ANXA1	0.00441784	-2.81081
P04406	GAPDH	0.00528033	-0.578148
P04792	HSPB1	0.00827467	-1.07878
P05062	ALDOB	0.0485277	-2.66112
P05106	ITGB3	0.0051599	-0.930984
P05107	ITGB2	0.0221186	-1.02842
P05198	EIF2S1	0.0118903	-0.582014
P05387	RPLP2	6.66956e-05	-1.04317
P05388	RPLP0	0.00281923	-0.777428
P06730	EIF4E	0.0137939	-1.64673
P06737	PYGL	0.0449199	-0.165724
P06756	ITGAV	0.0162524	-1.34976
P07355	ANXA2	2.56519e-05	-2.21427
P07858	CTSB	0.00313716	-0.869311
P08133	ANXA6	0.00290571	-0.485738
P08311	CTSG	0.00600628	-2.12982
P08758	ANXA5	0.00545481	-0.719491
P08865	RPSA	0.0166445	-0.597518
P09486	SPARC	0.0150495	-2.3549
P09496	CLTA	0.00136247	-2.72606
P09668	CTSH	0.0176831	-0.496117
P10155	RO60	0.00389664	-0.47569
P10412	H1-4	0.0113486	-0.620404
P10643	C7	0.00314838	-0.567465
P11021	HSPA5	0.00940983	-0.274354
P11215	ITGAM	0.0100132	-2.11996
P11216	PYGB	0.0407615	-0.959306
P11387	TOP1	0.0249196	-0.348916
P11413	G6PD	0.00164206	-0.508225
P11586	MTHFD1	0.00156653	-0.303113
P12109	COL6A1	0.0442282	-0.781762
P12111	COL6A3	0.00404538	-1.7898
P12268	IMPDH2	0.0151941	-0.255026
P12956	XRCC6	0.000961536	-0.629071
P13010	XRCC5	0.0366365	-0.418108
P13639	EEF2	0.0388097	-0.307689
P13796	LCP1	0.0116985	-0.860552
P13807	GYS1	0.0358682	-0.4169
P13861	PRKAR2A	0.0475963	-0.51511
P14866	HNRNPL	0.00802251	-0.614095
P15121	AKR1B1	0.0248315	-0.770087
P15153	RAC2	0.0162164	-1.90664
P15260	IFNGR1	0.00460974	-1.66709
P16150	SPN	3.67584e-05	-14.4479
P17612	PRKACA	0.0155935	-0.458075
P17812	CTPS1	0.0304945	-0.247534
P17858	PFKL	0.0217334	-1.27157
P17987	TCP1	0.00547973	-0.638478
P18031	PTPN1	0.028378	-0.358688
P18510	IL1RN	0.0227775	-14.4929
P19397	CD53	0.014155	-0.57171
P19440	GGT1	0.0421376	-0.627529
P19823	ITIH2	0.00957076	-0.734211
P19878	NCF2	0.000767421	-1.88192
P20339	RAB5A	0.0346216	-1.04474
P21281	ATP6V1B2	0.00212049	-0.88733
P21589	NT5E	0.0053129	-0.519681
P21980	TGM2	0.00258511	-1.14039
P22234	PAICS	0.00672038	-0.651126
P23396	RPS3	0.0234757	-0.607969
P25685	DNAJB1	0.00695912	-0.812432
P26038	MSN	0.0166948	-0.874298
P26196	DDX6	0.0240645	-1.10566
P26447	S100A4	0.00500499	-1.71778
P26640	VARS1	0.0220565	-0.688178
P29144	TPP2	6.58124e-05	-1.37146
P29350	PTPN6	0.0277364	-1.08065
P29401	TKT	0.00491308	-1.06714
P30050	RPL12	0.00454385	-1.10642
P30520	ADSS2	0.0484883	-0.516023
P31946	YWHAB	0.00495296	-5.82362
P32119	PRDX2	0.0121123	-1.16124
P34932	HSPA4	0.0237929	-0.749731
P35030	PRSS3	0.000488723	-1.95598
P35241	RDX	0.00718387	-0.592709
P35520	CBS	0.0280177	-0.858085
P36969	GPX4	0.0121392	-1.23524
P37802	TAGLN2	0.0209259	-0.830441
P38606	ATP6V1A	0.00332813	-1.3097
P39900	MMP12	0.00733681	-0.860098
P40121	CAPG	0.0142237	-1.75394
P40227	CCT6A	0.000891927	-0.919796
P40429	RPL13A	0.0191659	-0.226236
P40925	MDH1	0.000190692	-0.670908
P40926	MDH2	0.0203581	-0.860261
P41227	NAA10	0.0281041	-1.02734
P41252	IARS1	0.00173491	-0.502465
P42858	HTT	0.0294056	-1.24175
P43007	SLC1A4	0.0157823	-1.75535
P46087	NOP2	9.58508e-05	-13.6317
P46531	NOTCH1	0.00717714	-1.53737
P46781	RPS9	0.00989493	-0.397544
P46940	IQGAP1	0.00149999	-1.56359
P47897	QARS1	0.00165658	-11.8914
P48509	CD151	0.000449777	-0.999606
P48643	CCT5	0.00241813	-0.645937
P49189	ALDH9A1	0.02789	-1.17804
P49327	FASN	0.00183397	-1.04616
P49368	CCT3	0.00113775	-0.581793
P49588	AARS1	0.0119309	-1.27789
P49757	NUMB	0.000710419	-13.1006
P50570	DNM2	0.0286426	-0.891562
P50990	CCT8	0.0119916	-0.730012
P50991	CCT4	0.000605667	-0.722015
P51665	PSMD7	0.0483592	-0.78941
P51884	LUM	0.0268093	-0.961927
P52566	ARHGDIB	0.00687697	-0.579455
P52597	HNRNPF	0.0304841	-1.70711
P53396	ACLY	0.0170196	-0.507522
P53621	COPA	0.0369533	-0.358791
P53992	SEC24C	0.0413511	-0.283538
P54709	ATP1B3	0.0466239	-0.690254
P55036	PSMD4	0.0339225	-0.895661
P55072	VCP	0.0100515	-0.476412
P56192	MARS1	0.0138923	-0.494337
P57737	CORO7	0.037246	-0.330059
P59998	ARPC4	0.0406301	-1.56597
P60228	EIF3E	0.00682264	-0.560341
P60660	MYL6	0.0083457	-0.71173
P60866	RPS20	0.0120364	-0.627804
P60953	CDC42	0.00384159	-1.43484
P61201	COPS2	0.0377534	-1.57656
P61289	PSME3	0.00693858	-1.01061
P61978	HNRNPK	0.00487015	-0.43667
P62140	PPP1CB	0.0205409	-1.20642
P62191	PSMC1	0.0159079	-0.170139
P62195	PSMC5	0.0255309	-0.539533
P62269	RPS18	0.0381867	-1.45315
P62314	SNRPD1	0.00292105	-2.11622
P62328	TMSB4X	0.0389944	-0.246525
P62805	H4C1	0.0027949	-0.609732
P62820	RAB1A	0.0332685	-0.968118
P62829	RPL23	0.0146729	-1.80227
P62873	GNB1	0.048444	-1.68227
P62888	RPL30	0.0159813	-1.87274
P62906	RPL10A	0.00400113	-0.757254
P62913	RPL11	0.00285747	-0.364258
P68366	TUBA4A	0.00683512	-0.735758
P68371	TUBB4B	0.00538415	-0.608938
P78417	GSTO1	0.0467923	-1.35582
P84085	ARF5	0.0234112	-1.18742
Q00610	CLTC	0.00378644	-0.942919
Q01432	AMPD3	0.0189908	-0.601802
Q01433	AMPD2	0.00964747	-1.61972
Q03405	PLAUR	0.0365382	-0.39711
Q03692	COL10A1	0.0143573	-1.49284
Q04941	PLP2	0.00945437	-0.694207
Q06830	PRDX1	0.0145821	-0.818707
Q08211	DHX9	0.0432512	-0.508715
Q08431	MFGE8	0.00125037	-13.3606
Q08AM6	VAC14	0.038805	-0.397736
Q09666	AHNAK	0.0496384	-0.430647
Q12931	TRAP1	0.0207291	-0.406174
Q13045	FLII	0.000385384	-0.619545
Q13155	AIMP2	0.019056	-0.616675
Q13162	PRDX4	8.68305e-05	-12.7837
Q13200	PSMD2	0.00361639	-0.359187
Q13303	KCNAB2	0.0392623	-0.846875
Q13347	EIF3I	0.0421178	-0.724339
Q13409	DYNC1I2	0.0239424	-1.91313
Q13509	TUBB3	0.00293783	-1.28699
Q13547	HDAC1	0.0273908	-2.32062
Q13630	GFUS	0.000617428	-12.9855
Q14166	TTLL12	0.0347176	-0.90718
Q14194	CRMP1	0.011686	-1.12467
Q14204	DYNC1H1	0.00026037	-1.04505
Q14624	ITIH4	0.00538821	-1.11562
Q14974	KPNB1	0.00820505	-1.45421
Q15008	PSMD6	0.0281016	-0.402061
Q15042	RAB3GAP1	0.0397001	-0.467813
Q15149	PLEC	0.000461414	-0.925575
Q15365	PCBP1	0.0135084	-0.669159
Q15366	PCBP2	0.0131257	-0.619951
Q15393	SF3B3	0.000750471	-1.25478
Q15418	RPS6KA1	0.0260063	-0.747245
Q15435	PPP1R7	0.0401553	-1.46436
Q15582	TGFBI	0.000949892	-0.969114
Q15631	TSN	0.0204429	-0.458922
Q15942	ZYX	6.38036e-05	-0.798833
Q16555	DPYSL2	0.00131811	-1.29412
Q16658	FSCN1	0.0220562	-0.909441
Q16831	UPP1	0.0194558	-1.6018
Q5T4S7	UBR4	0.0334248	-0.469253
Q5VWZ2	LYPLAL1	0.0048569	-0.655069
Q641Q3	METRNL	0.0036292	-10.2441
Q6SA08	TSSK4	0.00969801	-0.697365
Q6ZS81	WDFY4	0.00725679	-0.748429
Q76LX8	ADAMTS13	0.00472783	-1.25382
Q7KZF4	SND1	0.00519711	-0.578483
Q86W42	THOC6	0.0466845	-0.164242
Q8IWC1	MAP7D3	0.00404387	-2.28228
Q8N119	MMP21	0.00349571	-1.75701
Q8NBJ5	COLGALT1	0.0181471	-1.73869
Q8TD19	NEK9	0.00113261	-0.510884
Q8WU79	SMAP2	0.0126495	-1.09366
Q92597	NDRG1	0.0194329	-1.95899
Q92598	HSPH1	0.0150336	-0.633922
Q92841	DDX17	0.0313264	-0.352296
Q92900	UPF1	0.0251919	-0.906931
Q969P0	IGSF8	0.0467965	-0.555304
Q96SB4	SRPK1	0.000440321	-11.1769
Q96TA1	NIBAN2	0.0358486	-1.37299
Q99460	PSMD1	0.00176316	-0.593264
Q99536	VAT1	0.00862548	-1.21374
Q99829	CPNE1	7.39313e-05	-2.75109
Q99832	CCT7	4.71608e-05	-0.972465
Q9BQA1	WDR77	0.00219914	-0.531291
Q9BXJ9	NAA15	0.043729	-0.839524
Q9C0E8	LNPK	0.00425182	-1.73695
Q9H4G4	GLIPR2	0.00454255	-2.52143
Q9H4M9	EHD1	0.00100849	-0.681885
Q9NQW7	XPNPEP1	0.0013708	-0.60813
Q9NR45	NANS	0.00388171	-0.148657
Q9NY65	TUBA8	0.0217663	-1.21843
Q9P2J5	LARS1	0.00424614	-0.522994
Q9UBT2	UBA2	0.00255273	-0.866629
Q9UHD8	SEPTIN9	0.0200268	-0.485076
Q9UKK9	NUDT5	0.000145507	-11.5682
Q9Y230	RUVBL2	0.0033811	-0.998588
Q9Y262	EIF3L	0.00411763	-0.84749
Q9Y265	RUVBL1	0.000539686	-0.988825
Q9Y3I0	RTCB	0.0303097	-0.886531
Q9Y5K5	UCHL5	0.0137072	-1.63163
Q9Y6G9	DYNC1LI1	0.0220633	-0.401355

## Sheet: Pathway
Category	CategoryID	GO	Description	PARENT_GO	LogP	Enrichment	Z-score	#TotalGeneInLibrary	#GeneInGO	#GeneInHitList	#GeneInGOAndHitList	%InGO	STDV %InGO	GeneID	Hits	Log(q-value)	GeneList
Reactome Gene Sets	6	R-HSA-1280215	Cytokine Signaling in Immune system		-16	5.6	12	30182	730	268	36	13	2.1	301|302|998|1511|1977|2317|2335|3123|3185|3459|3557|3684|3689|3837|3936|4312|4478|5566|5700|5705|5707|5708|5709|5710|5713|5716|5770|5777|6175|6195|6624|6950|7076|9446|9861|10197	ANXA1|ANXA2|CDC42|CTSG|EIF4E|FLNB|FN1|HLA-DRB1|HNRNPF|IFNGR1|IL1RN|ITGAM|ITGB2|KPNB1|LCP1|MMP1|MSN|PRKACA|PSMC1|PSMC5|PSMD1|PSMD2|PSMD3|PSMD4|PSMD7|PSMD10|PTPN1|PTPN6|RPLP0|RPS6KA1|FSCN1|TCP1|TIMP1|GSTO1|PSMD6|PSME3	-13	MyList
Reactome Gene Sets	6	R-HSA-3858494	Beta-catenin independent WNT signaling		-10	11	11	30182	146	268	14	5.2	1.4	1211|1213|2782|5700|5705|5707|5708|5709|5710|5713|5716|5880|9861|10197	CLTA|CLTC|GNB1|PSMC1|PSMC5|PSMD1|PSMD2|PSMD3|PSMD4|PSMD7|PSMD10|RAC2|PSMD6|PSME3	-8	MyList
Reactome Gene Sets	6	R-HSA-1474244	Extracellular matrix organization		-9.6	6.8	9.5	30182	300	268	18	6.7	1.5	977|1291|1293|1300|1508|1511|2335|3684|3685|3689|3690|4060|4312|4321|5339|6678|7076|79709	CD151|COL6A1|COL6A3|COL10A1|CTSB|CTSG|FN1|ITGAM|ITGAV|ITGB2|ITGB3|LUM|MMP1|MMP12|PLEC|SPARC|TIMP1|COLGALT1	-7.4	MyList
GO Biological Processes	19	GO:0030335	positive regulation of cell migration	19_GO:0040011 locomotion	-7.3	4.2	7.2	30182	569	268	21	7.8	1.6	301|977|998|1512|2159|2335|3309|3315|3685|3690|4851|5880|5962|6678|6693|7114|7264|8650|8828|8895|152007	ANXA1|CD151|CDC42|CTSH|F10|FN1|HSPA5|HSPB1|ITGAV|ITGB3|NOTCH1|RAC2|RDX|SPARC|SPN|TMSB4X|GFUS|NUMB|NRP2|CPNE3|GLIPR2	-5.4	MyList
Reactome Gene Sets	6	R-HSA-216083	Integrin cell surface interactions		-7.2	12	9.5	30182	85	268	9	3.4	1.1	1291|1293|1300|2335|3684|3685|3689|3690|4060	COL6A1|COL6A3|COL10A1|FN1|ITGAM|ITGAV|ITGB2|ITGB3|LUM	-5.3	MyList
GO Biological Processes	19	GO:0007229	integrin-mediated signaling pathway	19_GO:0023052 signaling	-6.8	11	9	30182	94	268	9	3.4	1.1	335|998|2335|3684|3685|3689|3690|7791|11093	APOA1|CDC42|FN1|ITGAM|ITGAV|ITGB2|ITGB3|ZYX|ADAMTS13	-4.9	MyList
GO Biological Processes	19	GO:0045785	positive regulation of cell adhesion	19_GO:0048518 positive regulation of biological process	-6.4	4.2	6.7	30182	482	268	18	6.7	1.5	86|301|335|998|1511|1785|2335|3123|3685|3689|3690|5329|5777|6188|7037|7052|7264|10808	ACTL6A|ANXA1|APOA1|CDC42|CTSG|DNM2|FN1|HLA-DRB1|ITGAV|ITGB2|ITGB3|PLAUR|PTPN6|RPS3|TFRC|TGM2|GFUS|HSPH1	-4.6	MyList
GO Biological Processes	19	GO:0009611	response to wounding	19_GO:0050896 response to stimulus	-6.3	4.3	6.7	30182	443	268	17	6.3	1.5	308|309|977|1192|1511|2159|2335|3315|3690|4321|5329|5339|5777|7076|9525|11093|80856	ANXA5|ANXA6|CD151|CLIC1|CTSG|F10|FN1|HSPB1|ITGB3|MMP12|PLAUR|PLEC|PTPN6|TIMP1|VPS4B|ADAMTS13|LNPK	-4.4	MyList
Reactome Gene Sets	6	R-HSA-194138	Signaling by VEGF		-5.2	8.3	7.2	30182	108	268	8	3	1	998|3315|3685|3690|4688|5566|8828|10768	CDC42|HSPB1|ITGAV|ITGB3|NCF2|PRKACA|NRP2|AHCYL1	-3.5	MyList
