# Supplementary material for: Myeloid cell-expressed MNDA enhances M2 polarization to facilitate the metastasis of hepatocellular carcinoma
Source: Research Square preprint supplement (doi:10.21203/rs.3.rs-3480636/v1), 2023-10-28
Supplement: Supplementary file 2 [file 2175baa275934a73115850b2.xlsx]

## Sheet: All.gene.anno
GeneID	shCtrl1_counts	shCtrl1_fpkm	shCtrl2_counts	shCtrl2_fpkm	shCtrl3_counts	shCtrl3_fpkm	shMNDA1_1_counts	shMNDA1_1_fpkm	shMNDA1_2_counts	shMNDA1_2_fpkm	shMNDA1_3_counts	shMNDA1_3_fpkm	shMNDA2_1_counts	shMNDA2_1_fpkm	shMNDA2_2_counts	shMNDA2_2_fpkm	shMNDA2_3_counts	shMNDA2_3_fpkm	Chr	Start	End	GeneSymbol	EntrezID	Description	Biological Process	Cellular Component	Molecular Function	KEGG AnnotInfo	KEGG url	shMNDA-1vsControl.logFC	shMNDA-1vsControl.Pvalue	shMNDA-1vsControl.q	shMNDA-1vsControl.signaficant	shMNDA-2vsControl.logFC	shMNDA-2vsControl.Pvalue	shMNDA-2vsControl.q	shMNDA-2vsControl.signaficant	shMNDA-1vsshMNDA-2.logFC	shMNDA-1vsshMNDA-2.Pvalue	shMNDA-1vsshMNDA-2.q	shMNDA-1vsshMNDA-2.signaficant
RNF14	2774	14.4237	2665	15.696	2774	15.0164	3205	17.7162	3391	17.3543	3726	18.7109	2570	14.2619	2525	14.0374	2502	12.8148	chr5	141346402	141369856	RNF14	9604	e3 ubiquitin-protein ligase rnf14 isoform x1	GO:0000209//protein polyubiquitination; GO:0006357//regulation of transcription from RNA polymerase II promoter; GO:0032436//positive regulation of proteasomal ubiquitin-dependent protein catabolic process; GO:0042787//protein ubiquitination involved in ubiquitin-dependent protein catabolic process; GO:0045893//positive regulation of transcription, DNA-templated; GO:0060765//regulation of androge…	GO:0000151//ubiquitin ligase complex; GO:0005634//nucleus; GO:0005737//cytoplasm	GO:0003713//transcription coactivator activity; GO:0008270//zinc ion binding; GO:0016874//ligase activity; GO:0031624//ubiquitin conjugating enzyme binding; GO:0050681//androgen receptor binding; GO:0061630//ubiquitin protein ligase activity	K11971 E3 ubiquitin-protein ligase RNF14 [EC:2.3.2.31] | (RefSeq) RNF14, ARA54, HFB30, HRIHFB2038, T	http://www.genome.jp/dbget-bin/www_bget?hsa:9604	0.130647	0.00723747	0.0118628	FALSE	-0.0696774	0.189817	0.247452	FALSE	0.196053	0.000171356	0.000333412	FALSE
DUOXA1	5	0.0533291	4	0.0483252	11	0.122145	25	0.283469	22	0.230953	33	0.339929	4	0.0455332	0	0	0	0	chr15	45409564	45422075	DUOXA1	90527	dual oxidase maturation factor 1 isoform x1	GO:0015031//protein transport; GO:0042743//hydrogen peroxide metabolic process; GO:0045666//positive regulation of neuron differentiation; GO:0050727//regulation of inflammatory response; GO:2000379//positive regulation of reactive oxygen species metabolic process; GO:2000609//regulation of thyroid hormone generation	GO:0005789//endoplasmic reticulum membrane; GO:0005886//plasma membrane; GO:0016021//integral component of membrane	-	K17233 dual oxidase maturation factor 1 | (RefSeq) DUOXA1, NIP, NUMBIP, mol; dual oxidase maturation	http://www.genome.jp/dbget-bin/www_bget?hsa:90527	1.78651	1.78356e-05	3.78291e-05	UP	-2.16974	0.00885047	0.0146922	DOWN	3.9634	1.19228e-11	3.7184e-11	UP
UBE2Q2	1281	9.25624	1131	9.25696	1251	9.4109	1907	14.649	2076	14.7646	1964	13.7059	1076	8.29797	953	7.36265	1125	8.0074	chr15	76135627	76193388	UBE2Q2	92912	ubiquitin-conjugating enzyme e2 q2 isoform x1	GO:0070936//protein K48-linked ubiquitination	GO:0005737//cytoplasm	GO:0005524//ATP binding; GO:0061631//ubiquitin conjugating enzyme activity	K10582 ubiquitin-conjugating enzyme E2 Q [EC:2.3.2.23] | (RefSeq) UBE2Q2; ubiquitin conjugating enzy	http://www.genome.jp/dbget-bin/www_bget?hsa:92912	0.5038	4.88748e-20	2.11516e-19	FALSE	-0.173171	0.00521226	0.00890768	FALSE	0.673058	6.231e-27	3.39717e-26	FALSE
RNF10	5290	29.9825	4829	31.002	4933	29.1079	7990	48.1428	8734	48.7229	9363	51.2516	6786	41.0488	6525	39.5411	7441	41.5429	chr12	120972132	121015397	RNF10	9921	ring finger protein 10	GO:0010626//negative regulation of Schwann cell proliferation; GO:0031643//positive regulation of myelination; GO:0045944//positive regulation of transcription from RNA polymerase II promoter; GO:0051865//protein autoubiquitination	GO:0005634//nucleus; GO:0005737//cytoplasm	GO:0004842//ubiquitin-protein transferase activity; GO:0005515//protein binding; GO:0008270//zinc ion binding; GO:0044212//transcription regulatory region DNA binding	no KO assigned | (RefSeq) RNF10, RIE2; ring finger protein 10	http://www.genome.jp/dbget-bin/www_bget?hsa:9921	0.594803	2.13794e-47	1.86047e-46	FALSE	0.504443	3.5956e-41	2.71662e-40	FALSE	0.0863452	0.0264407	0.0397499	FALSE
RNF11	4642	32.9857	3813	30.6907	4251	31.4485	6182	46.7004	7216	50.469	7807	53.5777	7478	56.7126	7187	54.6038	7405	51.832	chr1	51701945	51739119	RNF11	26994	ring finger protein 11	GO:0042787//protein ubiquitination involved in ubiquitin-dependent protein catabolic process; GO:0051865//protein autoubiquitination	GO:0000151//ubiquitin ligase complex; GO:0005634//nucleus; GO:0005769//early endosome; GO:0055037//recycling endosome; GO:0070062//extracellular exosome	GO:0003677//DNA binding; GO:0004842//ubiquitin-protein transferase activity; GO:0005515//protein binding; GO:0008270//zinc ion binding	K11980 E3 ubiquitin-protein ligase RNF11 | (RefSeq) RNF11, CGI-123, SID1669; ring finger protein 11	http://www.genome.jp/dbget-bin/www_bget?hsa:26994	0.541653	5.61013e-27	3.00908e-26	FALSE	0.843071	7.42301e-94	1.27316e-92	FALSE	-0.305664	3.93323e-09	1.07032e-08	FALSE
RNF13	6029	45.1939	5311	45.0952	6038	47.1211	5913	47.121	6515	48.0681	6737	48.7732	5819	46.554	6093	48.8339	6199	45.773	chr3	149530475	149679926	RNF13	11342	e3 ubiquitin-protein ligase rnf13	GO:0051865//protein autoubiquitination	GO:0000139//Golgi membrane; GO:0005637//nuclear inner membrane; GO:0005765//lysosomal membrane; GO:0005789//endoplasmic reticulum membrane; GO:0016021//integral component of membrane; GO:0031902//late endosome membrane	GO:0005515//protein binding; GO:0008270//zinc ion binding; GO:0016874//ligase activity; GO:0061630//ubiquitin protein ligase activity	K15692 E3 ubiquitin-protein ligase RNF13 [EC:2.3.2.27] | (RefSeq) RNF13, EIEE73, RZF; ring finger pr	http://www.genome.jp/dbget-bin/www_bget?hsa:11342	-0.0554394	0.140881	0.18553	FALSE	0.103841	0.0058301	0.00990354	FALSE	-0.16339	4.76286e-05	9.75887e-05	FALSE
REM1	1	0.01308	0	0	0	0	0	0	0	0	0	0	0	0	0	0	0	0	chr20	30063091	30072708	REM1	28954	gtp-binding protein rem 1	GO:0007264//small GTPase mediated signal transduction	GO:0005622//intracellular; GO:0016020//membrane	GO:0005516//calmodulin binding; GO:0005525//GTP binding	K07847 Rad and Gem related GTP binding protein 1 | (RefSeq) REM1, GD:REM, GES, REM; RRAD and GEM lik	http://www.genome.jp/dbget-bin/www_bget?hsa:28954	-	-	-	-	-	-	-	-	-	-	-	-
REM2	58	0.68151	45	0.598931	46	0.562718	114	1.42404	145	1.67695	142	1.61144	35	0.438921	31	0.389459	31	0.358806	chr14	23352432	23356889	REM2	161253	gtp-binding protein rem 2	GO:0007264//small GTPase mediated signal transduction	GO:0005622//intracellular; GO:0005886//plasma membrane	GO:0003924//GTPase activity; GO:0005525//GTP binding	K07848 Rad and Gem related GTP binding protein 2 | (RefSeq) REM2; RRAD and GEM like GTPase 2	http://www.genome.jp/dbget-bin/www_bget?hsa:161253	1.22941	5.7034e-12	1.78147e-11	UP	-0.571494	0.0202053	0.0318451	FALSE	1.79767	1.61848e-20	7.22659e-20	UP
SYNGR2	6229	81.5241	5536	82.0699	5604	76.3579	5105	71.0289	5476	70.5405	5478	69.242	5385	75.2189	5568	77.9152	6027	77.7002	chr17	76164626	76169009	SYNGR2	9144	synaptogyrin-2	GO:0006605//protein targeting	GO:0016021//integral component of membrane; GO:0030672//synaptic vesicle membrane; GO:0031594//neuromuscular junction; GO:0070062//extracellular exosome	GO:0005515//protein binding	no KO assigned | (RefSeq) SYNGR2; synaptogyrin 2	http://www.genome.jp/dbget-bin/www_bget?hsa:9144	-0.309524	1.87153e-14	6.48651e-14	FALSE	0.00949577	0.808585	0.85548	FALSE	-0.323031	2.7347e-17	1.09298e-16	FALSE
RPEL1	6	0.0615312	8	0.0929297	6	0.0640595	7	0.0763158	5	0.0504687	13	0.128756	4	0.0437803	7	0.0767534	14	0.141425	chr10	105005644	105007773	RPEL1	729020	ribulose-phosphate 3-epimerase isoform x1	GO:0009052//pentose-phosphate shunt, non-oxidative branch; GO:0019323//pentose catabolic process; GO:0031532//actin cytoskeleton reorganization; GO:0043086//negative regulation of catalytic activity; GO:0043149//stress fiber assembly; GO:0044262//cellular carbohydrate metabolic process; GO:0048870//cell motility	GO:0005634//nucleus; GO:0005829//cytosol; GO:0030054//cell junction; GO:0045202//synapse; GO:0070062//extracellular exosome	GO:0003779//actin binding; GO:0004750//ribulose-phosphate 3-epimerase activity; GO:0004864//protein phosphatase inhibitor activity; GO:0008157//protein phosphatase 1 binding; GO:0042803//protein homodimerization activity; GO:0046872//metal ion binding	K01783 ribulose-phosphate 3-epimerase [EC:5.1.3.1] | (RefSeq) RPEL1; ribulose-5-phosphate-3-epimeras	http://www.genome.jp/dbget-bin/www_bget?hsa:729020	0.11618	1	1	FALSE	0.344697	0.635205	0.700186	FALSE	-0.232803	0.758358	0.802612	FALSE
UCHL5	4002	26.3466	3844	28.6649	3968	27.1961	2946	20.6183	3142	20.3592	3220	20.4731	3832	26.9245	3884	27.339	3911	25.3623	chr1	192981496	193028523	UCHL5	51377	ubiquitin carboxyl-terminal hydrolase isozyme l5 isoform x1	GO:0006281//DNA repair; GO:0006310//DNA recombination; GO:0006355//regulation of transcription, DNA-templated; GO:0006511//ubiquitin-dependent protein catabolic process; GO:0010951//negative regulation of endopeptidase activity; GO:0016579//protein deubiquitination; GO:0021670//lateral ventricle development; GO:0030901//midbrain development; GO:0048853//forebrain morphogenesis; GO:0061136//regula…	GO:0000502//proteasome complex; GO:0005829//cytosol; GO:0031011//Ino80 complex	GO:0004843//ubiquitin-specific protease activity; GO:0004866//endopeptidase inhibitor activity; GO:0044822//poly(A) RNA binding; GO:0070628//proteasome binding	K05610 ubiquitin carboxyl-terminal hydrolase L5 [EC:3.4.19.12] | (RefSeq) UCHL5, CGI-70, INO80R, UCH	http://www.genome.jp/dbget-bin/www_bget?hsa:51377	-0.542253	7.4206e-35	4.89794e-34	FALSE	0.0191046	0.676271	0.737875	FALSE	-0.565511	4.47605e-38	3.24929e-37	FALSE
TYW3	1170	7.54784	993	7.25615	1127	7.56918	818	5.60999	832	5.28285	939	5.85036	1263	8.69589	1125	7.7597	1149	7.30147	chr1	75198836	75232361	TYW3	127253	trna wybutosine-synthesizing protein 3 homolog isoform x1	GO:0008033//tRNA processing; GO:0032259//methylation	-	GO:0008168//methyltransferase activity	K15450 tRNA wybutosine-synthesizing protein 3 [EC:2.1.1.282] | (RefSeq) TYW3, C1orf171; tRNA-yW synt	http://www.genome.jp/dbget-bin/www_bget?hsa:127253	-0.541117	8.02084e-17	3.07474e-16	FALSE	0.150792	0.0302098	0.0463226	FALSE	-0.696028	2.18593e-19	9.38549e-19	FALSE
DUOXA2	0	0	0	0	1	0.0157815	10	0.161151	9	0.13428	6	0.0878398	0	0	0	0	0	0	chr15	45406523	45410304	DUOXA2	405753	dual oxidase maturation factor 2	GO:0015031//protein transport; GO:0042743//hydrogen peroxide metabolic process; GO:0050727//regulation of inflammatory response; GO:2000609//regulation of thyroid hormone generation	GO:0005789//endoplasmic reticulum membrane; GO:0016021//integral component of membrane	-	K17232 dual oxidase maturation factor 2 | (RefSeq) DUOXA2, SIMNIPHOM, TDH5; dual oxidase maturation	http://www.genome.jp/dbget-bin/www_bget?hsa:405753	4.04371	2.28346e-05	4.79987e-05	UP	-	-	-	-	5.97096	4.0842e-06	9.14332e-06	UP
MZT2A	804	25.3423	753	26.8847	787	25.8258	687	23.0207	690	21.4066	590	17.9607	524	17.6277	502	16.918	612	19.0018	chr2	132241533	132250064	MZT2A	653784	mitotic-spindle organizing protein 2b	-	GO:0005813//centrosome; GO:0005819//spindle; GO:0008274//gamma-tubulin ring complex	GO:0005515//protein binding	K16574 mitotic-spindle organizing protein 2A/2B | (RefSeq) MZT2A, FAM128A, MOZART2A; mitotic spindle	http://www.genome.jp/dbget-bin/www_bget?hsa:653784	-0.44684	1.07754e-06	2.48415e-06	FALSE	-0.476804	4.60012e-10	1.34079e-09	FALSE	0.026844	0.789286	0.830226	FALSE
CSNK2A2	1078	14.1937	987	14.7202	1035	14.1875	1426	19.9604	1525	19.7631	1574	20.0153	942	13.2374	1009	14.2044	1065	13.8128	chr16	58191811	58231782	CSNK2A2	1459	casein kinase ii subunit alpha	GO:0006355//regulation of transcription, DNA-templated; GO:0006457//protein folding; GO:0006468//protein phosphorylation; GO:0006915//apoptotic process; GO:0007283//spermatogenesis; GO:0016055//Wnt signaling pathway; GO:0021987//cerebral cortex development; GO:0071174//mitotic spindle checkpoint; GO:0097421//liver regeneration; GO:1901796//regulation of signal transduction by p53 class mediator; …	GO:0000785//chromatin; GO:0001669//acrosomal vesicle; GO:0005654//nucleoplasm; GO:0005829//cytosol; GO:0005886//plasma membrane; GO:0005956//protein kinase CK2 complex; GO:0031519//PcG protein complex	GO:0004674//protein serine/threonine kinase activity; GO:0005524//ATP binding; GO:0047485//protein N-terminus binding	K03097 casein kinase II subunit alpha [EC:2.7.11.1] | (RefSeq) CSNK2A2, CK2A2, CK2alpha', CSNK2A1; c	http://www.genome.jp/dbget-bin/www_bget?hsa:1459	0.348667	5.52292e-10	1.5637e-09	FALSE	0.00253864	0.977646	1	FALSE	0.342014	1.10963e-08	2.93816e-08	FALSE
ATRX	2758	5.39681	2284	5.06243	2767	5.6369	2621	5.45233	3122	6.0129	3071	5.80367	3015	6.29657	2945	6.16146	3042	5.86348	chrX	76760356	77041755	ATRX	546	alpha thalassemia mental retardation syndrome x-linked (rad54 cerevisiae)	GO:0006281//DNA repair; GO:0006306//DNA methylation; GO:0006310//DNA recombination; GO:0006336//DNA replication-independent nucleosome assembly; GO:0006338//chromatin remodeling; GO:0007283//spermatogenesis; GO:0010571//positive regulation of nuclear cell cycle DNA replication; GO:0030330//DNA damage response, signal transduction by p53 class mediator; GO:0030900//forebrain development; GO:003129…	GO:0000784//nuclear chromosome, telomeric region; GO:0005721//pericentric heterochromatin; GO:0016605//PML body; GO:0031933//telomeric heterochromatin; GO:0070603//SWI/SNF superfamily-type complex; GO:1990707//nuclear subtelomeric heterochromatin	GO:0003677//DNA binding; GO:0003678//DNA helicase activity; GO:0003682//chromatin binding; GO:0005524//ATP binding; GO:0015616//DNA translocase activity; GO:0035064//methylated histone binding; GO:0046872//metal ion binding; GO:0070087//chromo shadow domain binding	K10779 transcriptional regulator ATRX [EC:3.6.4.12] | (RefSeq) ATRX, JMS, MRX52, RAD54, RAD54L, XH2,	http://www.genome.jp/dbget-bin/www_bget?hsa:546	-0.0211828	0.698102	0.749019	FALSE	0.251306	1.28308e-07	3.23876e-07	FALSE	-0.276604	3.7513e-08	9.64296e-08	FALSE
PMM2	2829	26.6016	2519	26.8301	2669	26.1283	2514	25.1311	2503	23.1656	2691	24.4382	1958	19.6499	1936	19.4642	2157	19.9792	chr16	8891670	8943194	PMM2	5373	phosphomannomutase 2	GO:0006486//protein glycosylation; GO:0009298//GDP-mannose biosynthetic process	GO:0005829//cytosol; GO:0043025//neuronal cell body; GO:0070062//extracellular exosome	GO:0004615//phosphomannomutase activity; GO:0005515//protein binding	K17497 phosphomannomutase [EC:5.4.2.8] | (RefSeq) PMM2, CDG1, CDG1a, CDGS, PMI, PMI1, PMM_2; phospho	http://www.genome.jp/dbget-bin/www_bget?hsa:5373	-0.25238	9.14272e-08	2.26918e-07	FALSE	-0.363466	1.30012e-17	5.17839e-17	FALSE	0.107187	0.030509	0.045448	FALSE
PMM1	943	16.0549	784	15.1194	861	15.2612	434	7.85523	593	9.9371	493	8.10633	480	8.72193	450	8.19154	444	7.44618	chr22	41972890	41985871	PMM1	5372	phosphomannomutase 1	GO:0006013//mannose metabolic process; GO:0009298//GDP-mannose biosynthetic process	GO:0005829//cytosol; GO:0043025//neuronal cell body	GO:0004615//phosphomannomutase activity; GO:0005515//protein binding; GO:0046872//metal ion binding	K17497 phosphomannomutase [EC:5.4.2.8] | (RefSeq) PMM1, PMM_1, PMMH-22, Sec53; phosphomannomutase 1	http://www.genome.jp/dbget-bin/www_bget?hsa:5372	-0.964112	1.48693e-25	7.60412e-25	FALSE	-0.867023	5.78328e-28	3.17966e-27	FALSE	-0.101928	0.35707	0.424814	FALSE
ASS1	1519	18.2611	1376	18.7373	1427	17.86	1940	24.7938	2098	24.8246	2041	23.6969	2107	27.0338	2002	25.7329	2243	26.5614	chr9	133320094	133376661	ASS1	445	argininosuccinate synthase isoform x1	GO:0000050//urea cycle; GO:0000052//citrulline metabolic process; GO:0000053//argininosuccinate metabolic process; GO:0001822//kidney development; GO:0001889//liver development; GO:0006526//arginine biosynthetic process; GO:0006531//aspartate metabolic process; GO:0006953//acute-phase response; GO:0007494//midgut development; GO:0007568//aging; GO:0007584//response to nutrient; GO:0010043//respon…	GO:0005634//nucleus; GO:0005741//mitochondrial outer membrane; GO:0005764//lysosome; GO:0005783//endoplasmic reticulum; GO:0005829//cytosol; GO:0043204//perikaryon; GO:0070062//extracellular exosome; GO:0070852//cell body fiber	GO:0004055//argininosuccinate synthase activity; GO:0005524//ATP binding; GO:0015643//toxic substance binding; GO:0016597//amino acid binding; GO:0042802//identical protein binding; GO:0044822//poly(A) RNA binding	K01940 argininosuccinate synthase [EC:6.3.4.5] | (RefSeq) ASS1, ASS, CTLN1; argininosuccinate syntha	http://www.genome.jp/dbget-bin/www_bget?hsa:445	0.295801	1.52578e-08	3.9698e-08	FALSE	0.597749	2.01847e-34	1.30009e-33	FALSE	-0.305896	8.39254e-10	2.37982e-09	FALSE
NCBP1	2190	8.89006	1910	8.78242	2235	9.44553	1787	7.71183	2047	8.17874	2079	8.15071	2615	11.3294	2663	11.5581	2676	10.7004	chr9	100395705	100436030	NCBP1	4686	nuclear cap-binding protein subunit 1	GO:0000184//nuclear-transcribed mRNA catabolic process, nonsense-mediated decay; GO:0006368//transcription elongation from RNA polymerase II promoter; GO:0006369//termination of RNA polymerase II transcription; GO:0006370//7-methylguanosine mRNA capping; GO:0006406//mRNA export from nucleus; GO:0006446//regulation of translational initiation; GO:0008334//histone mRNA metabolic process; GO:0008543…	GO:0005654//nucleoplasm; GO:0005739//mitochondrion; GO:0005829//cytosol; GO:0005845//mRNA cap binding complex; GO:0005846//nuclear cap binding complex; GO:0030529//ribonucleoprotein complex	GO:0000339//RNA cap binding; GO:0005515//protein binding; GO:0044822//poly(A) RNA binding	K12882 nuclear cap-binding protein subunit 1 | (RefSeq) NCBP1, CBP80, NCBP, Sto1; nuclear cap bindin	http://www.genome.jp/dbget-bin/www_bget?hsa:4686	-0.296163	1.38504e-08	3.6153e-08	FALSE	0.373338	1.99134e-14	7.02947e-14	FALSE	-0.673607	2.68821e-39	2.00718e-38	FALSE
SPX	5	0.047097	0	0	1	0.00980644	18	0.180247	13	0.120524	35	0.318399	2	0.0201061	9	0.0906403	2	0.0185569	chr12	21679191	21685881	SPX	80763	spexin	GO:0003084//positive regulation of systemic arterial blood pressure; GO:0010459//negative regulation of heart rate; GO:0032099//negative regulation of appetite; GO:0035814//negative regulation of renal sodium excretion; GO:0044539//long-chain fatty acid import; GO:0045944//positive regulation of transcription from RNA polymerase II promoter; GO:0051930//regulation of sensory perception of pain	GO:0005615//extracellular space; GO:0030133//transport vesicle	GO:0005184//neuropeptide hormone activity; GO:0031765//type 2 galanin receptor binding; GO:0031766//type 3 galanin receptor binding	no KO assigned | (RefSeq) SPX, C12orf39; spexin hormone	http://www.genome.jp/dbget-bin/www_bget?hsa:80763	3.197	1.08134e-06	2.49225e-06	UP	1.13367	0.242462	0.308115	FALSE	2.05468	0.000960693	0.00172927	UP
ZNF709	78	0.347785	47	0.237375	74	0.343508	81	0.383949	67	0.294035	118	0.508134	52	0.247454	44	0.209761	55	0.241564	chr19	12571998	12595632	ZNF709	163051	zinc finger protein 709	GO:0006355//regulation of transcription, DNA-templated	GO:0005634//nucleus	GO:0003677//DNA binding; GO:0046872//metal ion binding	K09228 KRAB domain-containing zinc finger protein | (RefSeq) ZNF709; zinc finger protein 709	http://www.genome.jp/dbget-bin/www_bget?hsa:163051	0.227154	0.346143	0.413772	FALSE	-0.348385	0.120455	0.165474	FALSE	0.570514	0.0175242	0.0270783	FALSE
ZNF708	288	1.57668	291	1.80453	315	1.79535	317	1.84494	408	2.19846	423	2.23651	481	2.81041	489	2.8623	433	2.33503	chr19	21473962	21512241	ZNF708	7562	zinc finger protein 708 isoform x1	GO:0006355//regulation of transcription, DNA-templated	GO:0005634//nucleus; GO:0016021//integral component of membrane	GO:0000978//RNA polymerase II core promoter proximal region sequence-specific DNA binding; GO:0005515//protein binding; GO:0046872//metal ion binding	K09228 KRAB domain-containing zinc finger protein | (RefSeq) ZNF708, KOX8, ZNF15, ZNF15L1; zinc fing	http://www.genome.jp/dbget-bin/www_bget?hsa:7562	0.158719	0.166808	0.214821	FALSE	0.694183	9.98642e-10	2.85864e-09	FALSE	-0.53991	1.80327e-06	4.14903e-06	FALSE
ZNF879	212	1.77836	155	1.47277	212	1.85143	255	2.27402	287	2.36959	296	2.39803	144	1.2892	193	1.73099	190	1.56996	chr5	178450776	178461388	ZNF879	345462	zinc finger protein 879	GO:0006355//regulation of transcription, DNA-templated	GO:0005634//nucleus	GO:0003677//DNA binding; GO:0003700//transcription factor activity, sequence-specific DNA binding; GO:0046872//metal ion binding	K09228 KRAB domain-containing zinc finger protein | (RefSeq) ZNF879, DKFZp686E2433; zinc finger prot	http://www.genome.jp/dbget-bin/www_bget?hsa:345462	0.339634	0.00440403	0.00740881	FALSE	-0.0885915	0.56733	0.63351	FALSE	0.425129	0.00105636	0.00189245	FALSE
ZNF878	8	0.0991763	8	0.112338	10	0.129064	38	0.500811	28	0.341652	36	0.431023	29	0.383698	27	0.35788	20	0.244231	chr19	12154620	12163782	ZNF878	729747	zinc finger protein 878	GO:0006355//regulation of transcription, DNA-templated	GO:0005634//nucleus	GO:0003676//nucleic acid binding; GO:0046872//metal ion binding	K09228 KRAB domain-containing zinc finger protein | (RefSeq) ZNF878; zinc finger protein 878	http://www.genome.jp/dbget-bin/www_bget?hsa:729747	1.76463	9.21331e-07	2.13509e-06	UP	1.58091	5.13377e-05	0.000107179	UP	0.179122	0.57068	0.627792	FALSE
CBX3	5471	53.9288	4920	54.9338	5506	56.5039	3886	40.722	4375	42.4463	4422	42.0972	3921	41.2501	3843	40.5023	4057	39.3924	chr7	26240831	26253227	CBX3	11335	chromobox protein homolog 3	GO:0006338//chromatin remodeling; GO:0016569//covalent chromatin modification; GO:0045892//negative regulation of transcription, DNA-templated; GO:0048511//rhythmic process; GO:0071549//cellular response to dexamethasone stimulus	GO:0000779//condensed chromosome, centromeric region; GO:0000784//nuclear chromosome, telomeric region; GO:0005637//nuclear inner membrane; GO:0005719//nuclear euchromatin; GO:0005819//spindle; GO:0010369//chromocenter; GO:0031618//nuclear pericentric heterochromatin; GO:0035985//senescence-associated heterochromatin focus	GO:0000976//transcription regulatory region sequence-specific DNA binding; GO:0019904//protein domain specific binding; GO:0042802//identical protein binding; GO:1990226//histone methyltransferase binding	K11586 chromobox protein 3 | (RefSeq) CBX3, HECH, HP1-GAMMA, HP1Hs-gamma; chromobox 3	http://www.genome.jp/dbget-bin/www_bget?hsa:11335	-0.523127	3.74434e-40	2.79044e-39	FALSE	-0.383949	4.55394e-25	2.31129e-24	FALSE	-0.143293	0.000451283	0.000840818	FALSE
DISC1	729	4.91329	672	5.1302	738	5.17833	607	4.34916	633	4.1991	645	4.19841	650	4.67554	734	5.28928	742	4.92609	chr1	231762561	232177018	DISC1	27185	disrupted in schizophrenia 1 protein isoform l	GO:0000226//microtubule cytoskeleton organization; GO:0001954//positive regulation of cell-matrix adhesion; GO:0002052//positive regulation of neuroblast proliferation; GO:0021846//cell proliferation in forebrain; GO:0021852//pyramidal neuron migration; GO:0030177//positive regulation of Wnt signaling pathway; GO:0031929//TOR signaling; GO:0045773//positive regulation of axon extension; GO:005156…	GO:0005634//nucleus; GO:0005739//mitochondrion; GO:0005783//endoplasmic reticulum; GO:0005813//centrosome; GO:0005871//kinesin complex; GO:0005874//microtubule; GO:0008021//synaptic vesicle; GO:0014069//postsynaptic density; GO:0030054//cell junction; GO:0030286//dynein complex; GO:0030424//axon; GO:0036064//ciliary basal body; GO:0044297//cell body; GO:0045211//postsynaptic membrane; GO:0048471/…	GO:0019894//kinesin binding; GO:0032403//protein complex binding; GO:0032947//protein complex scaffold; GO:0043565//sequence-specific DNA binding	K16534 disrupted in schizophrenia 1 protein | (RefSeq) DISC1, C1orf136, SCZD9; DISC1 scaffold protei	http://www.genome.jp/dbget-bin/www_bget?hsa:27185	-0.378674	1.93881e-07	4.70302e-07	FALSE	0.0337656	0.660838	0.723028	FALSE	-0.416495	1.10492e-07	2.75929e-07	FALSE
ZNF703	1643	10.7163	1263	9.33109	1462	9.9276	2822	19.5676	2727	17.5066	2664	16.7812	1490	10.3722	1453	10.1328	1655	10.6331	chr8	37553269	37557539	ZNF703	80139	zinc finger protein 703	GO:0010718//positive regulation of epithelial to mesenchymal transition; GO:0017015//regulation of transforming growth factor beta receptor signaling pathway; GO:0030335//positive regulation of cell migration; GO:0033601//positive regulation of mammary gland epithelial cell proliferation; GO:0034111//negative regulation of homotypic cell-cell adhesion; GO:0034333//adherens junction assembly; GO:0…	GO:0005737//cytoplasm; GO:0016363//nuclear matrix; GO:0043234//protein complex	GO:0003676//nucleic acid binding; GO:0046872//metal ion binding; GO:0070491//repressing transcription factor binding	no KO assigned | (RefSeq) ZNF703, NLZ1, ZEPPO1, ZNF503L, ZPO1; zinc finger protein 703	http://www.genome.jp/dbget-bin/www_bget?hsa:80139	0.721349	1.41428e-27	7.71038e-27	FALSE	0.119545	0.0352262	0.05358	FALSE	0.597636	3.39545e-22	1.5984e-21	FALSE
SPR	1540	23.0563	1348	22.8601	1459	22.7411	1529	24.3359	1427	21.0281	1502	21.7179	717	11.4568	822	13.1582	909	13.4056	chr2	73114512	73119289	SPR	6697	sepiapterin reductase	GO:0006729//tetrahydrobiopterin biosynthetic process; GO:0006809//nitric oxide biosynthetic process; GO:0050999//regulation of nitric-oxide synthase activity; GO:0055114//oxidation-reduction process	GO:0005654//nucleoplasm; GO:0005829//cytosol; GO:0070062//extracellular exosome	GO:0004033//aldo-keto reductase (NADP) activity; GO:0004757//sepiapterin reductase activity; GO:0050661//NADP binding	K00072 sepiapterin reductase [EC:1.1.1.153] | (RefSeq) SPR, SDR38C1; sepiapterin reductase	http://www.genome.jp/dbget-bin/www_bget?hsa:6697	-0.15718	0.0121764	0.0193021	FALSE	-0.786532	3.30334e-32	2.01163e-31	FALSE	0.625881	3.81231e-15	1.39506e-14	FALSE
ZNF700	712	5.36853	600	5.12444	710	5.57342	851	6.82145	878	6.51595	994	7.23839	601	4.83642	622	5.01443	676	5.02083	chr19	12035883	12061588	ZNF700	90592	zinc finger protein 700 isoform x1	GO:0006355//regulation of transcription, DNA-templated	GO:0005634//nucleus	GO:0003677//DNA binding; GO:0005515//protein binding; GO:0046872//metal ion binding	K09228 KRAB domain-containing zinc finger protein | (RefSeq) ZNF700; zinc finger protein 700	http://www.genome.jp/dbget-bin/www_bget?hsa:90592	0.233769	0.00139708	0.00249203	FALSE	-0.0465903	0.531281	0.597992	FALSE	0.276321	0.000174733	0.000339789	FALSE
ZNF707	940	9.01755	737	8.00845	845	8.43929	1337	13.6353	1171	11.0567	1347	12.4798	981	10.0439	1039	10.6569	1262	11.9254	chr8	144766622	144777555	ZNF707	286075	zinc finger protein 707 isoform x2	GO:0006355//regulation of transcription, DNA-templated	GO:0005634//nucleus	GO:0003677//DNA binding; GO:0005515//protein binding; GO:0046872//metal ion binding	K09228 KRAB domain-containing zinc finger protein | (RefSeq) ZNF707; zinc finger protein 707	http://www.genome.jp/dbget-bin/www_bget?hsa:286075	0.421416	1.60025e-07	3.91091e-07	FALSE	0.42286	3.54797e-08	9.25343e-08	FALSE	-0.00512242	0.961497	0.986219	FALSE
ZNF706	5560	43.4994	4937	43.7514	5290	43.0876	3805	31.6472	3932	30.2782	4003	30.2464	4480	37.4077	4397	36.7807	4781	36.8452	chr8	102209266	102218292	ZNF706	51123	zinc finger protein 706	GO:0006417//regulation of translation; GO:0045892//negative regulation of transcription, DNA-templated; GO:1902455//negative regulation of stem cell population maintenance	GO:0005634//nucleus; GO:0005737//cytoplasm; GO:0016021//integral component of membrane	GO:0046872//metal ion binding	no KO assigned | (RefSeq) ZNF706, HSPC038, PNAS-106, PNAS-113; zinc finger protein 706	http://www.genome.jp/dbget-bin/www_bget?hsa:51123	-0.622856	8.7916e-60	9.49729e-59	FALSE	-0.16603	6.61167e-07	1.59395e-06	FALSE	-0.460808	3.83936e-31	2.36227e-30	FALSE
ZNF704	25	0.0379598	28	0.0481573	24	0.0379388	139	0.224373	230	0.343732	219	0.32115	30	0.048616	17	0.0275987	41	0.0613226	chr8	81540686	81787016	ZNF704	619279	zinc finger protein 704	-	-	GO:0046872//metal ion binding	no KO assigned | (RefSeq) ZNF704, Gig1; zinc finger protein 704	http://www.genome.jp/dbget-bin/www_bget?hsa:619279	2.72092	6.35663e-31	3.79849e-30	UP	0.222596	0.522646	0.588991	FALSE	2.49076	1.81569e-22	8.62617e-22	UP
ZC3H10	212	2.07382	165	1.82827	179	1.82296	216	2.24626	257	2.47444	294	2.77755	285	2.97546	270	2.82393	236	2.27405	chr12	56512004	56516281	ZC3H10	84872	zinc finger ccch domain-containing protein 10	-	GO:0005737//cytoplasm	GO:0005515//protein binding; GO:0044822//poly(A) RNA binding; GO:0046872//metal ion binding	no KO assigned | (RefSeq) ZC3H10, ZC3HDC10; zinc finger CCCH-type containing 10	http://www.genome.jp/dbget-bin/www_bget?hsa:84872	0.266889	0.0368654	0.0543488	FALSE	0.558141	5.18174e-05	0.000108085	FALSE	-0.295349	0.0284162	0.0425355	FALSE
RNF114	3088	27.3421	2635	26.4275	2789	25.7094	2768	26.0551	2909	25.3517	2768	23.6701	2980	28.1608	3067	29.0352	3474	30.2997	chr20	48552914	48570422	RNF114	55905	e3 ubiquitin-protein ligase rnf114	GO:0000209//protein polyubiquitination; GO:0007275//multicellular organismal development; GO:0007283//spermatogenesis; GO:0030154//cell differentiation; GO:0032436//positive regulation of proteasomal ubiquitin-dependent protein catabolic process	GO:0005634//nucleus; GO:0005829//cytosol	GO:0008270//zinc ion binding; GO:0016874//ligase activity; GO:0031624//ubiquitin conjugating enzyme binding; GO:0061630//ubiquitin protein ligase activity	K15697 RING finger protein 114 [EC:2.3.2.27] | (RefSeq) RNF114, PSORS12, ZNF313; ring finger protein	http://www.genome.jp/dbget-bin/www_bget?hsa:55905	-0.205455	2.2918e-05	4.81679e-05	FALSE	0.204143	1.94294e-06	4.52156e-06	FALSE	-0.413426	1.73494e-16	6.71149e-16	FALSE
RNF115	671	7.51643	549	6.96597	655	7.63869	1159	13.8021	1227	13.5283	1278	13.8261	754	9.01435	699	8.37186	805	8.88256	chr1	145610990	145689005	RNF115	27246	e3 ubiquitin-protein ligase rnf115	GO:0042059//negative regulation of epidermal growth factor receptor signaling pathway; GO:0042787//protein ubiquitination involved in ubiquitin-dependent protein catabolic process; GO:0043161//proteasome-mediated ubiquitin-dependent protein catabolic process; GO:0043162//ubiquitin-dependent protein catabolic process via the multivesicular body sorting pathway; GO:0051865//protein autoubiquitinati…	GO:0005829//cytosol	GO:0005515//protein binding; GO:0008270//zinc ion binding; GO:0016874//ligase activity; GO:0061630//ubiquitin protein ligase activity	K11982 E3 ubiquitin-protein ligase RNF115/126 [EC:2.3.2.27] | (RefSeq) RNF115, BCA2, ZNF364; ring fi	http://www.genome.jp/dbget-bin/www_bget?hsa:27246	0.77178	9.24323e-32	5.64708e-31	FALSE	0.312439	1.94317e-05	4.19905e-05	FALSE	0.455471	1.60754e-12	5.21345e-12	FALSE
ZC3H15	3382	34.6181	3124	36.221	3386	36.0832	4169	45.3663	4725	47.6035	4980	49.231	2993	32.6972	2874	31.4537	3083	31.0854	chr2	187350885	187374088	ZC3H15	55854	zinc finger ccch domain-containing protein 15	GO:0019221//cytokine-mediated signaling pathway	GO:0005730//nucleolus; GO:0005737//cytoplasm	GO:0005515//protein binding; GO:0044822//poly(A) RNA binding; GO:0046872//metal ion binding	no KO assigned | (RefSeq) ZC3H15, HT010, LEREPO4, MSTP012; zinc finger CCCH-type containing 15	http://www.genome.jp/dbget-bin/www_bget?hsa:55854	0.289185	4.84792e-11	1.44898e-10	FALSE	-0.101772	0.0131733	0.0212802	FALSE	0.386854	6.44428e-18	2.63318e-17	FALSE
ZC3H14	1812	10.0765	1597	10.0595	1826	10.5716	1397	8.25887	1725	9.44168	1685	9.04966	1781	10.5704	1616	9.60836	1783	9.7669	chr14	89029253	89079853	ZC3H14	79882	zinc finger ccch domain-containing protein 14 isoform x3	GO:0043488//regulation of mRNA stability; GO:1900364//negative regulation of mRNA polyadenylation	GO:0005730//nucleolus; GO:0005737//cytoplasm; GO:0016607//nuclear speck	GO:0005515//protein binding; GO:0008143//poly(A) binding; GO:0044822//poly(A) RNA binding; GO:0046872//metal ion binding	K23038 zinc finger CCCH domain-containing protein 14 | (RefSeq) ZC3H14, MRT56, MSUT-2, NY-REN-37, SU	http://www.genome.jp/dbget-bin/www_bget?hsa:79882	-0.321037	1.05748e-07	2.61349e-07	FALSE	0.0286158	0.594844	0.660422	FALSE	-0.353867	3.42283e-08	8.81862e-08	FALSE
SPN	14593	46.0109	14126	50.4493	14563	47.803	4629	15.5158	4986	15.4731	5341	16.2637	8912	29.9892	9640	32.4974	10402	32.3062	chr16	29674271	29681828	SPN	6693	leukosialin	GO:0001562//response to protozoan; GO:0001662//behavioral fear response; GO:0001808//negative regulation of type IV hypersensitivity; GO:0001843//neural tube closure; GO:0001934//positive regulation of protein phosphorylation; GO:0006357//regulation of transcription from RNA polymerase II promoter; GO:0006935//chemotaxis; GO:0006968//cellular defense response; GO:0007163//establishment or mainten…	GO:0001931//uropod; GO:0005604//basement membrane; GO:0005615//extracellular space; GO:0005654//nucleoplasm; GO:0005667//transcription factor complex; GO:0005730//nucleolus; GO:0005737//cytoplasm; GO:0005887//integral component of plasma membrane; GO:0009897//external side of plasma membrane; GO:0070062//extracellular exosome	GO:0003677//DNA binding; GO:0003700//transcription factor activity, sequence-specific DNA binding; GO:0004888//transmembrane signaling receptor activity; GO:0005515//protein binding; GO:0046872//metal ion binding	K06477 sialophorin | (RefSeq) SPN, CD43, GALGP, GPL115, LSN; sialophorin	http://www.genome.jp/dbget-bin/www_bget?hsa:6693	-1.73287	0	0	DOWN	-0.540754	1.01021e-33	6.39047e-33	FALSE	-1.19635	1.21121e-164	3.92063e-163	DOWN
RNF111	3355	12.4023	2990	12.5199	3441	13.2429	3535	13.8922	3551	12.9202	4085	14.5842	2391	9.4333	2471	9.76648	2581	9.39834	chr15	59279787	59389618	RNF111	54778	e3 ubiquitin-protein ligase arkadia isoform x11	GO:0000209//protein polyubiquitination; GO:0007389//pattern specification process; GO:0030511//positive regulation of transforming growth factor beta receptor signaling pathway; GO:0030579//ubiquitin-dependent SMAD protein catabolic process; GO:0031398//positive regulation of protein ubiquitination; GO:0042787//protein ubiquitination involved in ubiquitin-dependent protein catabolic process; GO:0…	GO:0005654//nucleoplasm; GO:0005730//nucleolus; GO:0005737//cytoplasm; GO:0043234//protein complex	GO:0008270//zinc ion binding; GO:0016874//ligase activity; GO:0032184//SUMO polymer binding; GO:0046332//SMAD binding; GO:0061630//ubiquitin protein ligase activity	K10635 E3 ubiquitin-protein ligase Arkadia [EC:2.3.2.27] | (RefSeq) RNF111, ARK, hRNF111; ring finge	http://www.genome.jp/dbget-bin/www_bget?hsa:54778	-0.00552993	0.913276	0.940976	FALSE	-0.351308	3.22455e-16	1.21897e-15	FALSE	0.341645	1.70884e-11	5.2877e-11	FALSE
IQCA1	0	0	1	0.00781261	0	0	1	0.00733243	1	0.00678865	0	0	0	0	0	0	0	0	chr2	237232790	237416178	IQCA1	79781	iq and aaa domain-containing protein 1 isoform x3	-	-	GO:0005524//ATP binding	no KO assigned | (RefSeq) IQCA1, 4930465P12Rik, DRC11, IQCA; IQ motif containing with AAA domain 1	http://www.genome.jp/dbget-bin/www_bget?hsa:79781	0.632549	1	1	FALSE	-	-	-	-	2.5682	0.511973	0.570784	FALSE
CEACAM5	0	0	0	0	0	0	0	0	4	0.0275991	0	0	0	0	0	0	0	0	chr19	42212504	42234353	CEACAM5	1048	carcinoembryonic antigen-related cell adhesion molecule 5	GO:0010832//negative regulation of myotube differentiation; GO:0034109//homotypic cell-cell adhesion; GO:2000811//negative regulation of anoikis	GO:0016323//basolateral plasma membrane; GO:0031225//anchored component of membrane; GO:0070062//extracellular exosome; GO:0071575//integral component of external side of plasma membrane	GO:0034235//GPI anchor binding; GO:0042803//protein homodimerization activity	K06499 carcinoembryonic antigen-related cell adhesion molecule | (RefSeq) CEACAM5, CD66e, CEA; CEA c	http://www.genome.jp/dbget-bin/www_bget?hsa:1048	3.45465	0.141991	0.18553	FALSE	-	-	-	-	3.43468	0.143164	0.186061	FALSE
GRIN1	0	0	0	0	4	0.0220627	10	0.0563226	13	0.0677894	12	0.0614005	4	0.0226175	2	0.0113291	1	0.00521872	chr9	140033609	140063214	GRIN1	2902	glutamate receptor nmda 1 isoform x2	GO:0000165//MAPK cascade; GO:0001661//conditioned taste aversion; GO:0001967//suckling behavior; GO:0001975//response to amphetamine; GO:0006874//cellular calcium ion homeostasis; GO:0007616//long-term memory; GO:0008344//adult locomotory behavior; GO:0008355//olfactory learning; GO:0008542//visual learning; GO:0018964//propylene metabolic process; GO:0019233//sensory perception of pain; GO:00215…	GO:0005783//endoplasmic reticulum; GO:0008021//synaptic vesicle; GO:0009986//cell surface; GO:0014069//postsynaptic density; GO:0017146//NMDA selective glutamate receptor complex; GO:0030054//cell junction; GO:0030426//growth cone; GO:0032590//dendrite membrane; GO:0043025//neuronal cell body; GO:0043083//synaptic cleft; GO:0043195//terminal bouton; GO:0043197//dendritic spine; GO:0044307//dendri…	GO:0004972//NMDA glutamate receptor activity; GO:0005088//Ras guanyl-nucleotide exchange factor activity; GO:0005234//extracellular-glutamate-gated ion channel activity; GO:0005262//calcium channel activity; GO:0005509//calcium ion binding; GO:0005516//calmodulin binding; GO:0016594//glycine binding; GO:0016595//glutamate binding; GO:0019899//enzyme binding; GO:0022843//voltage-gated cation chann…	K05208 glutamate receptor ionotropic, NMDA 1 | (RefSeq) GRIN1, GluN1, MRD8, NDHMSD, NDHMSR, NMD-R1,	http://www.genome.jp/dbget-bin/www_bget?hsa:2902	2.82883	3.25668e-05	6.76988e-05	UP	0.801141	0.589821	0.655502	FALSE	2.02252	0.00113422	0.00202341	UP
PISD	1317	10.278	1030	9.10497	1210	9.83093	2404	19.9447	2476	19.0186	2715	20.4631	1795	14.9506	1722	14.3684	1924	14.7904	chr22	32014477	32058550	PISD	23761	phosphatidylserine decarboxylase proenzyme isoform x2	GO:0008654//phospholipid biosynthetic process	GO:0005634//nucleus; GO:0005743//mitochondrial inner membrane; GO:0016021//integral component of membrane	GO:0004609//phosphatidylserine decarboxylase activity	K01613 phosphatidylserine decarboxylase [EC:4.1.1.65] | (RefSeq) PISD, DJ858B16, PSD, PSDC, PSSC, dJ	http://www.genome.jp/dbget-bin/www_bget?hsa:23761	0.900612	6.36344e-56	6.43072e-55	FALSE	0.658583	3.11565e-34	1.99904e-33	FALSE	0.237936	2.0958e-06	4.79936e-06	FALSE
FOXQ1	162	1.52594	121	1.29101	121	1.18658	126	1.26173	132	1.22378	124	1.12804	14	0.140742	9	0.0906403	12	0.111342	chr6	1312675	1314993	FOXQ1	94234	forkhead box protein q1	GO:0006357//regulation of transcription from RNA polymerase II promoter; GO:0031069//hair follicle morphogenesis	GO:0005634//nucleus	GO:0000981//RNA polymerase II transcription factor activity, sequence-specific DNA binding; GO:0043565//sequence-specific DNA binding	K09410 forkhead box protein Q | (RefSeq) FOXQ1, HFH1; forkhead box Q1	http://www.genome.jp/dbget-bin/www_bget?hsa:94234	-0.273046	0.0759393	0.105821	FALSE	-3.46878	4.79087e-43	3.76681e-42	DOWN	3.19359	1.85338e-40	1.42067e-39	UP
DHX9	4447	21.415	3947	21.5297	4570	22.9116	7943	40.6638	8676	41.1224	8740	40.6483	7716	39.6567	7903	40.691	8562	40.6143	chr1	182808439	182857117	DHX9	1660	atp-dependent rna helicase a isoform x1	GO:0000398//mRNA splicing, via spliceosome; GO:0001649//osteoblast differentiation; GO:0032481//positive regulation of type I interferon production; GO:0032508//DNA duplex unwinding; GO:0048511//rhythmic process; GO:0070934//CRD-mediated mRNA stabilization; GO:1903608//protein localization to cytoplasmic stress granule	GO:0005654//nucleoplasm; GO:0005730//nucleolus; GO:0005813//centrosome; GO:0005829//cytosol; GO:0016020//membrane; GO:0036464//cytoplasmic ribonucleoprotein granule; GO:0070937//CRD-mediated mRNA stability complex; GO:0097165//nuclear stress granule	GO:0001085//RNA polymerase II transcription factor binding; GO:0003677//DNA binding; GO:0004003//ATP-dependent DNA helicase activity; GO:0004004//ATP-dependent RNA helicase activity; GO:0005524//ATP binding; GO:0044822//poly(A) RNA binding	K13184 ATP-dependent RNA helicase A [EC:3.6.4.13] | (RefSeq) DHX9, DDX9, LKP, NDH2, NDHII, RHA; DExH	http://www.genome.jp/dbget-bin/www_bget?hsa:1660	0.771834	6.13182e-87	9.87924e-86	FALSE	0.942319	9.08027e-144	2.62272e-142	FALSE	-0.17454	4.34282e-07	1.0455e-06	FALSE
TCOF1	6426	29.3839	5404	27.9901	5707	27.1684	5205	25.3024	5383	24.2271	5140	22.6993	3105	15.1532	3142	15.3614	3522	15.8639	chr5	149737202	149779871	TCOF1	6949	treacher collins-franceschetti syndrome 1	GO:0001501//skeletal system development; GO:0006810//transport	GO:0005730//nucleolus; GO:0005737//cytoplasm	GO:0005215//transporter activity; GO:0005515//protein binding; GO:0044822//poly(A) RNA binding	K14562 Treacher Collins syndrome protein | (RefSeq) TCOF1, MFD1, TCS, TCS1, treacle; treacle ribosom	http://www.genome.jp/dbget-bin/www_bget?hsa:6949	-0.350219	4.12349e-14	1.41094e-13	FALSE	-0.800767	5.58863e-93	9.56564e-92	FALSE	0.44667	3.03183e-21	1.38205e-20	FALSE
CEACAM7	0	0	0	0	0	0	0	0	0	0	0	0	0	0	0	0	0	0	chr19	42177235	42192206	CEACAM7	1087	carcinoembryonic antigen-related cell adhesion molecule 7	-	GO:0005886//plasma membrane; GO:0016021//integral component of membrane; GO:0031225//anchored component of membrane	-	K06499 carcinoembryonic antigen-related cell adhesion molecule | (RefSeq) CEACAM7, CGM2; CEA cell ad	http://www.genome.jp/dbget-bin/www_bget?hsa:1087	-	-	-	-	-	-	-	-	-	-	-	-
NUP98	6047	23.8814	5117	22.8905	5741	23.6046	7011	29.4356	7477	29.064	8193	31.2495	7109	29.9642	6817	28.7852	7777	30.2542	chr11	3696240	3819022	NUP98	4928	nuclear pore complex protein nup98-nup96 isoform x2	GO:0000059//protein import into nucleus, docking; GO:0000973//posttranscriptional tethering of RNA polymerase II gene DNA at nuclear periphery; GO:0006260//DNA replication; GO:0006406//mRNA export from nucleus; GO:0006409//tRNA export from nucleus; GO:0007062//sister chromatid cohesion; GO:0007077//mitotic nuclear envelope disassembly; GO:0010827//regulation of glucose transport; GO:0016925//prot…	GO:0000776//kinetochore; GO:0005654//nucleoplasm; GO:0005829//cytosol; GO:0031080//nuclear pore outer ring; GO:0031965//nuclear membrane; GO:0034399//nuclear periphery; GO:0042405//nuclear inclusion body; GO:0044614//nuclear pore cytoplasmic filaments; GO:0044615//nuclear pore nuclear basket	GO:0003723//RNA binding; GO:0005487//nucleocytoplasmic transporter activity; GO:0005515//protein binding; GO:0008139//nuclear localization sequence binding; GO:0017056//structural constituent of nuclear pore	K14297 nuclear pore complex protein Nup98-Nup96 | (RefSeq) NUP98, ADIR2, NUP196, NUP96; nucleoporin	http://www.genome.jp/dbget-bin/www_bget?hsa:4928	0.228032	1.13365e-08	2.97056e-08	FALSE	0.403919	3.08378e-32	1.8793e-31	FALSE	-0.179938	1.15732e-05	2.5016e-05	FALSE
XPC	3493	20.5051	3013	20.0347	3282	20.0582	1412	8.81193	1605	9.27357	1555	8.81606	2777	17.3986	2848	17.8756	2980	17.2319	chr3	14186647	14220172	XPC	7508	dna repair protein complementing xp-c cells	GO:0000715//nucleotide-excision repair, DNA damage recognition; GO:0000717//nucleotide-excision repair, DNA duplex unwinding; GO:0006294//nucleotide-excision repair, preincision complex assembly; GO:0006298//mismatch repair; GO:0010224//response to UV-B; GO:0010996//response to auditory stimulus; GO:0016925//protein sumoylation; GO:0031573//intra-S DNA damage checkpoint; GO:0042493//response to d…	GO:0000111//nucleotide-excision repair factor 2 complex; GO:0005654//nucleoplasm; GO:0005730//nucleolus; GO:0005737//cytoplasm; GO:0005886//plasma membrane; GO:0070062//extracellular exosome; GO:0071942//XPC complex	GO:0000404//heteroduplex DNA loop binding; GO:0000405//bubble DNA binding; GO:0003684//damaged DNA binding; GO:0003697//single-stranded DNA binding; GO:0005515//protein binding	K10838 xeroderma pigmentosum group C-complementing protein | (RefSeq) XPC, RAD4, XP3, XPCC, p125; XP	http://www.genome.jp/dbget-bin/www_bget?hsa:7508	-1.2941	8.63701e-169	3.12206e-167	DOWN	-0.141838	0.000205724	0.000408283	FALSE	-1.15637	4.61886e-122	1.00503e-120	DOWN
SP1	10819	31.1283	9343	30.4491	10264	30.7449	8594	26.2866	9316	26.3818	10074	27.993	10656	32.7217	10765	33.116	11408	32.3318	chr12	53773979	53810230	SP1	6667	transcription factor sp1 isoform x1	GO:0003140//determination of left/right asymmetry in lateral mesoderm; GO:0003281//ventricular septum development; GO:0003283//atrial septum development; GO:0007565//female pregnancy; GO:0030512//negative regulation of transforming growth factor beta receptor signaling pathway; GO:0030514//negative regulation of BMP signaling pathway; GO:0038101//sequestering of nodal from receptor via nodal bind…	GO:0000790//nuclear chromatin; GO:0005576//extracellular region; GO:0005654//nucleoplasm; GO:0005737//cytoplasm; GO:0032993//protein-DNA complex	GO:0000978//RNA polymerase II core promoter proximal region sequence-specific DNA binding; GO:0000982//transcription factor activity, RNA polymerase II core promoter proximal region sequence-specific binding; GO:0001046//core promoter sequence-specific DNA binding; GO:0001103//RNA polymerase II repressing transcription factor binding; GO:0008022//protein C-terminus binding; GO:0016015//morphogen …	K04684 transcription factor Sp1 | (RefSeq) SP1; Sp1 transcription factor	http://www.genome.jp/dbget-bin/www_bget?hsa:6667	-0.317442	1.81986e-17	7.15635e-17	FALSE	0.153695	2.68933e-07	6.64623e-07	FALSE	-0.475237	2.65329e-37	1.8764e-36	FALSE
GRINA	9085	103.791	8377	108.404	8380	99.6708	13455	163.415	14602	164.194	13508	149.041	11190	136.439	11381	139.018	12448	140.084	chr8	145064226	145067583	GRINA	2907	protein lifeguard 1	GO:0032469//endoplasmic reticulum calcium ion homeostasis; GO:1902236//negative regulation of endoplasmic reticulum stress-induced intrinsic apoptotic signaling pathway	GO:0005783//endoplasmic reticulum; GO:0005794//Golgi apparatus; GO:0016021//integral component of membrane	GO:0044325//ion channel binding	K06890 uncharacterized protein | (RefSeq) GRINA, HNRGW, LFG1, NMDARA1, TMBIM3; glutamate ionotropic	http://www.genome.jp/dbget-bin/www_bget?hsa:2907	0.489214	1.06047e-25	5.45618e-25	FALSE	0.479365	2.11906e-37	1.47017e-36	FALSE	0.00589973	0.888601	0.919833	FALSE
CEACAM6	0	0	0	0	0	0	0	0	4	0.0330637	4	0.0324432	4	0.0358523	2	0.0179585	6	0.049635	chr19	42259428	42276113	CEACAM6	4680	carcinoembryonic antigen-related cell adhesion molecule 6 isoform x1	GO:0007165//signal transduction; GO:0007267//cell-cell signaling; GO:0050900//leukocyte migration	GO:0005615//extracellular space; GO:0005887//integral component of plasma membrane; GO:0031225//anchored component of membrane	GO:0005515//protein binding	K06499 carcinoembryonic antigen-related cell adhesion molecule | (RefSeq) CEACAM6, CD66c, CEAL, NCA;	http://www.genome.jp/dbget-bin/www_bget?hsa:4680	4.38087	0.0237846	0.0360573	UP	5.05964	0.00148671	0.00270469	UP	-0.80148	0.360657	0.428541	FALSE
NUP93	1376	10.2828	1060	8.97266	1356	10.5498	1338	10.6298	1315	9.67227	1280	9.23815	1190	9.49109	1206	9.63603	1525	11.2258	chr16	56764017	56878862	NUP93	9688	nuclear pore complex protein nup93 isoform x1	GO:0002230//positive regulation of defense response to virus by host; GO:0006409//tRNA export from nucleus; GO:0006606//protein import into nucleus; GO:0007077//mitotic nuclear envelope disassembly; GO:0010827//regulation of glucose transport; GO:0016925//protein sumoylation; GO:0016973//poly(A)+ mRNA export from nucleus; GO:0019083//viral transcription; GO:0031047//gene silencing by RNA; GO:0051…	GO:0005643//nuclear pore; GO:0031965//nuclear membrane; GO:0034399//nuclear periphery	GO:0017056//structural constituent of nuclear pore	K14309 nuclear pore complex protein Nup93 | (RefSeq) NUP93, NIC96; nucleoporin 93	http://www.genome.jp/dbget-bin/www_bget?hsa:9688	-0.137083	0.0652675	0.0919955	FALSE	0.0916884	0.233024	0.297804	FALSE	-0.232457	0.0028912	0.00492987	FALSE
SP5	0	0	0	0	2	0.0233602	7	0.0834888	6	0.0662547	12	0.130023	0	0	2	0.0239907	0	0	chr2	171571857	171574498	SP5	389058	transcription factor sp5	GO:0006355//regulation of transcription, DNA-templated; GO:0036342//post-anal tail morphogenesis; GO:0060349//bone morphogenesis; GO:0071407//cellular response to organic cyclic compound	GO:0005634//nucleus	GO:0000977//RNA polymerase II regulatory region sequence-specific DNA binding; GO:0046872//metal ion binding	K09195 transcription factor Sp5 | (RefSeq) SP5; Sp5 transcription factor	http://www.genome.jp/dbget-bin/www_bget?hsa:389058	3.23586	0.000162209	0.000317677	UP	0.0410108	1	1	FALSE	3.18858	0.000265023	0.000506046	UP
SP6	13	0.074728	22	0.143246	42	0.251349	48	0.293328	39	0.220654	30	0.166549	11	0.067485	18	0.110629	16	0.0905969	chr17	45922280	45933240	SP6	80320	transcription factor sp6	GO:0006355//regulation of transcription, DNA-templated; GO:0008284//positive regulation of cell proliferation; GO:0042481//regulation of odontogenesis	GO:0005634//nucleus; GO:0005829//cytosol	GO:0003677//DNA binding; GO:0046872//metal ion binding	K09196 transcription factor Sp6 | (RefSeq) SP6, EPFN, EPIPROFIN, KLF14; Sp6 transcription factor	http://www.genome.jp/dbget-bin/www_bget?hsa:80320	0.410044	0.326283	0.393228	FALSE	-0.733601	0.123471	0.169321	FALSE	1.13692	0.000816107	0.00147919	UP
SP7	1	0.00703497	2	0.0159372	0	0	0	0	1	0.00692421	8	0.0543541	2	0.0150164	0	0	0	0	chr12	53720359	53738577	SP7	121340	transcription factor sp7 isoform x1	GO:0001649//osteoblast differentiation; GO:0045944//positive regulation of transcription from RNA polymerase II promoter; GO:0060218//hematopoietic stem cell differentiation; GO:2000738//positive regulation of stem cell differentiation	GO:0005634//nucleus; GO:0005737//cytoplasm	GO:0003677//DNA binding; GO:0017151//DEAD/H-box RNA helicase binding; GO:0046872//metal ion binding	K09197 transcription factor Sp7 | (RefSeq) SP7, OI11, OI12, OSX, osterix; Sp7 transcription factor	http://www.genome.jp/dbget-bin/www_bget?hsa:121340	1.27294	0.280654	0.342951	FALSE	-0.471665	1	1	FALSE	1.74286	0.151191	0.195581	FALSE
SPPL3	1166	6.16847	1127	6.75341	1164	6.41092	1379	7.7556	1537	8.00314	1540	7.86828	1443	8.14741	1389	7.85664	1502	7.82712	chr12	121200313	121342155	SPPL3	121665	signal peptide peptidase-like 3	GO:0006465//signal peptide processing; GO:0006509//membrane protein ectodomain proteolysis; GO:0007204//positive regulation of cytosolic calcium ion concentration; GO:0032092//positive regulation of protein binding; GO:0035307//positive regulation of protein dephosphorylation; GO:0050852//T cell receptor signaling pathway; GO:0051533//positive regulation of NFAT protein import into nucleus; GO:00…	GO:0005765//lysosomal membrane; GO:0005791//rough endoplasmic reticulum; GO:0005829//cytosol; GO:0005886//plasma membrane; GO:0030660//Golgi-associated vesicle membrane; GO:0033116//endoplasmic reticulum-Golgi intermediate compartment membrane; GO:0071458//integral component of cytoplasmic side of endoplasmic reticulum membrane; GO:0071556//integral component of lumenal side of endoplasmic reticu…	GO:0042500//aspartic endopeptidase activity, intramembrane cleaving; GO:0042803//protein homodimerization activity	K09598 signal peptide peptidase-like 3 [EC:3.4.23.-] | (RefSeq) SPPL3, IMP2, MDHV1887, PRO4332, PSH1	http://www.genome.jp/dbget-bin/www_bget?hsa:121665	0.167681	0.00478078	0.00799096	FALSE	0.367662	1.3113e-10	3.92234e-10	FALSE	-0.203974	0.000180788	0.000351001	FALSE
GOLIM4	2879	14.6728	2472	14.2705	2679	14.2145	2718	14.7263	2957	14.8331	3259	16.0412	2500	13.5983	2218	12.0862	2593	13.0175	chr3	167726460	167813713	GOLIM4	27333	golgi integral membrane protein 4 isoform x2	GO:0006810//transport	GO:0005654//nucleoplasm; GO:0005796//Golgi lumen; GO:0005801//cis-Golgi network; GO:0010008//endosome membrane; GO:0016021//integral component of membrane; GO:0030133//transport vesicle; GO:0030139//endocytic vesicle; GO:0032580//Golgi cisterna membrane	-	K23540 golgi integral membrane protein 4 | (RefSeq) GOLIM4, GIMPC, GOLPH4, GPP130, P138; golgi integ	http://www.genome.jp/dbget-bin/www_bget?hsa:27333	-0.0430493	0.359411	0.427969	FALSE	-0.0920309	0.0583262	0.0852176	FALSE	0.0448739	0.416431	0.487721	FALSE
OPA3	977	4.35268	902	4.55186	951	4.41093	1695	8.02793	1857	8.14295	1700	7.31461	1263	6.00536	1228	5.84946	1413	6.20094	chr19	46031025	46088122	OPA3	80207	optic atrophy 3 protein isoform x1	GO:0007601//visual perception; GO:0019216//regulation of lipid metabolic process; GO:0040007//growth; GO:0050896//response to stimulus; GO:0050905//neuromuscular process; GO:0070584//mitochondrion morphogenesis	GO:0005739//mitochondrion	-	K23166 optic atrophy 3 protein | (RefSeq) OPA3, MGA3; outer mitochondrial membrane lipid metabolism	http://www.genome.jp/dbget-bin/www_bget?hsa:80207	0.696026	1.00481e-28	5.63606e-28	FALSE	0.505446	1.11352e-17	4.45328e-17	FALSE	0.18674	0.00220858	0.00381895	FALSE
OPA1	4078	14.0126	3612	14.0585	4125	14.7565	3793	13.8556	4218	14.2655	4385	14.552	3583	13.1399	3337	12.2598	3679	12.4524	chr3	193310933	193415600	OPA1	4976	mitochondrial dynamin-like 120 kda protein	GO:0000002//mitochondrial genome maintenance; GO:0000266//mitochondrial fission; GO:0007007//inner mitochondrial membrane organization; GO:0007601//visual perception; GO:0010636//positive regulation of mitochondrial fusion; GO:0014042//positive regulation of neuron maturation; GO:0019896//axon transport of mitochondrion; GO:0090201//negative regulation of release of cytochrome c from mitochondria…	GO:0005654//nucleoplasm; GO:0005741//mitochondrial outer membrane; GO:0005758//mitochondrial intermembrane space; GO:0016021//integral component of membrane; GO:0030061//mitochondrial crista; GO:0030425//dendrite; GO:0031314//extrinsic component of mitochondrial inner membrane; GO:1904115//axon cytoplasm	GO:0000287//magnesium ion binding; GO:0003924//GTPase activity; GO:0005515//protein binding; GO:0005525//GTP binding	K17079 optic atrophy protein 1 [EC:3.6.5.5] | (RefSeq) OPA1, BERHS, MGM1, MTDPS14, NPG, NTG, largeG;	http://www.genome.jp/dbget-bin/www_bget?hsa:4976	-0.127727	0.00188304	0.00331033	FALSE	-0.113159	0.00548773	0.00935252	FALSE	-0.0186769	0.665382	0.717949	FALSE
PSMA4	3750	68.8927	3576	74.4149	3889	74.382	4819	94.1176	5828	105.383	5764	102.269	3304	64.7823	3249	63.8186	3464	62.6864	chr15	78832747	78841604	PSMA4	5685	proteasome subunit alpha type-4	GO:0000165//MAPK cascade; GO:0000209//protein polyubiquitination; GO:0002223//stimulatory C-type lectin receptor signaling pathway; GO:0002479//antigen processing and presentation of exogenous peptide antigen via MHC class I, TAP-dependent; GO:0006521//regulation of cellular amino acid metabolic process; GO:0016032//viral process; GO:0031145//anaphase-promoting complex-dependent proteasomal ubiqu…	GO:0000932//cytoplasmic mRNA processing body; GO:0005654//nucleoplasm; GO:0005829//cytosol; GO:0019773//proteasome core complex, alpha-subunit complex; GO:0070062//extracellular exosome	GO:0004298//threonine-type endopeptidase activity; GO:0005515//protein binding	K02728 20S proteasome subunit alpha 3 [EC:3.4.25.1] | (RefSeq) PSMA4, HC9, HsT17706, PSC9; proteasom	http://www.genome.jp/dbget-bin/www_bget?hsa:5685	0.348954	5.26784e-12	1.64694e-11	FALSE	-0.121256	0.00465367	0.00799412	FALSE	0.466198	1.38114e-22	6.58558e-22	FALSE
RAB40C	1423	11.9276	1170	11.1085	1263	11.0215	1474	13.1347	1429	11.7893	1419	11.4871	978	8.74908	1067	9.56246	1207	9.96575	chr16	639357	679273	RAB40C	57799	ras-related protein rab-40c	GO:0001881//receptor recycling; GO:0007264//small GTPase mediated signal transduction; GO:0016567//protein ubiquitination; GO:0042552//myelination	GO:0005886//plasma membrane; GO:0048471//perinuclear region of cytoplasm	GO:0005525//GTP binding; GO:0019003//GDP binding	K07928 Ras-related protein Rab-40 | (RefSeq) RAB40C, RARL, RASL8C; RAB40C, member RAS oncogene famil	http://www.genome.jp/dbget-bin/www_bget?hsa:57799	-0.0275639	0.682895	0.734147	FALSE	-0.2027	0.0017931	0.00323767	FALSE	0.171528	0.018565	0.0285773	FALSE
RAB40B	160	1.98691	191	2.68665	179	2.31419	70	0.924119	53	0.647801	47	0.563684	165	2.18683	128	1.69951	204	2.49541	chr17	80614943	80656598	RAB40B	10966	ras-related protein rab-40b	GO:0007264//small GTPase mediated signal transduction; GO:0016567//protein ubiquitination	GO:0005622//intracellular; GO:0005886//plasma membrane	GO:0005525//GTP binding	K07928 Ras-related protein Rab-40 | (RefSeq) RAB40B, RAR, SEC4L; RAB40B, member RAS oncogene family	http://www.genome.jp/dbget-bin/www_bget?hsa:10966	-1.83526	1.85507e-19	7.87904e-19	DOWN	-0.0622202	0.722429	0.77768	FALSE	-1.77601	2.36956e-16	9.11871e-16	DOWN
RAB40A	69	1.11977	59	1.08455	66	1.11509	28	0.483069	28	0.447244	30	0.470197	25	0.433005	25	0.433785	25	0.399643	chrX	102754681	102774417	RAB40A	142684	ras-related protein rab-40a-like	GO:0007264//small GTPase mediated signal transduction; GO:0016567//protein ubiquitination	GO:0005739//mitochondrion; GO:0005886//plasma membrane	GO:0005525//GTP binding	K07928 Ras-related protein Rab-40 | (RefSeq) RAB40A, RAR2, RAR2A; RAB40A, member RAS oncogene family	http://www.genome.jp/dbget-bin/www_bget?hsa:142684	-1.36497	5.67647e-10	1.6061e-09	DOWN	-1.32266	9.88765e-09	2.67568e-08	DOWN	-0.0459217	0.895224	0.925786	FALSE
CBX1	1848	17.3472	1547	16.4489	1763	17.2293	1707	17.0346	2035	18.8018	2049	18.5759	1440	14.4266	1383	13.8805	1593	14.7298	chr17	46147414	46178883	CBX1	10951	chromobox protein homolog 1	GO:0045892//negative regulation of transcription, DNA-templated	GO:0000784//nuclear chromosome, telomeric region; GO:0001939//female pronucleus; GO:0001940//male pronucleus; GO:0005654//nucleoplasm; GO:0005720//nuclear heterochromatin; GO:0005721//pericentric heterochromatin; GO:0005819//spindle; GO:0010369//chromocenter	GO:0003682//chromatin binding; GO:0042803//protein homodimerization activity; GO:1990226//histone methyltransferase binding	K11585 chromobox protein 1 | (RefSeq) CBX1, CBX, HP1-BETA, HP1Hs-beta, HP1Hsbeta, M31, MOD1, p25beta	http://www.genome.jp/dbget-bin/www_bget?hsa:10951	-0.0296939	0.59626	0.652158	FALSE	-0.180451	0.000272207	0.000534235	FALSE	0.146705	0.0120776	0.0190679	FALSE
FBL	1486	27.8623	1370	29.0964	1505	29.378	1282	25.5539	1299	23.9726	1418	25.6776	937	18.7504	1044	20.9293	1178	21.7569	chr19	40325093	40337054	FBL	2091	rrna 2 -o-methyltransferase fibrillarin	GO:0000494//box C/D snoRNA 3'-end processing; GO:0001649//osteoblast differentiation; GO:0008033//tRNA processing; GO:0031167//rRNA methylation; GO:0048254//snoRNA localization; GO:1990258//histone glutamine methylation	GO:0001651//dense fibrillar component; GO:0001652//granular component; GO:0015030//Cajal body; GO:0016020//membrane; GO:0031428//box C/D snoRNP complex; GO:0032040//small-subunit processome; GO:0070062//extracellular exosome	GO:0001094//TFIID-class transcription factor binding; GO:0008649//rRNA methyltransferase activity; GO:0044822//poly(A) RNA binding; GO:0051117//ATPase binding; GO:1990259//histone-glutamine methyltransferase activity	K14563 rRNA 2'-O-methyltransferase fibrillarin [EC:2.1.1.-] | (RefSeq) FBL, FIB, FLRN, Nop1, RNU3IP1	http://www.genome.jp/dbget-bin/www_bget?hsa:2091	-0.32176	2.01126e-08	5.20412e-08	FALSE	-0.424697	3.50629e-11	1.07906e-10	FALSE	0.0989158	0.159192	0.205003	FALSE
COL7A1	32802	78.1452	25285	68.2315	28814	71.465	4470	11.3209	4640	10.88	4596	10.5746	17788	45.2275	17210	43.8368	19585	45.9599	chr3	48601506	48632593	COL7A1	1294	collagen alpha-1 chain	GO:0007155//cell adhesion; GO:0008544//epidermis development; GO:0010951//negative regulation of endopeptidase activity; GO:0030198//extracellular matrix organization; GO:0030574//collagen catabolic process; GO:0035987//endodermal cell differentiation; GO:0048208//COPII vesicle coating	GO:0000139//Golgi membrane; GO:0005590//collagen type VII trimer; GO:0005604//basement membrane; GO:0005615//extracellular space; GO:0005788//endoplasmic reticulum lumen; GO:0030134//ER to Golgi transport vesicle; GO:0033116//endoplasmic reticulum-Golgi intermediate compartment membrane	GO:0004867//serine-type endopeptidase inhibitor activity; GO:0042802//identical protein binding	K16628 collagen, type VII, alpha | (RefSeq) COL7A1, EBD1, EBDCT, EBR1, NDNC8; collagen type VII alph	http://www.genome.jp/dbget-bin/www_bget?hsa:1294	-2.8554	0	0	DOWN	-0.624568	1.95132e-47	1.70326e-46	FALSE	-2.2348	0	0	DOWN
FAM187B	0	0	0	0	0	0	0	0	0	0	0	0	0	0	0	0	0	0	chr19	35715704	35719628	FAM187B	148109	protein fam187b	-	GO:0016021//integral component of membrane	-	no KO assigned | (RefSeq) FAM187B, TMEM162; family with sequence similarity 187 member B	http://www.genome.jp/dbget-bin/www_bget?hsa:148109	-	-	-	-	-	-	-	-	-	-	-	-
KLLN	78	0.398363	81	0.468586	87	0.462586	64	0.347485	72	0.36193	73	0.360071	170	0.926633	142	0.775405	208	1.04641	chr10	89618918	89623194	KLLN	100144748	killin	GO:0006915//apoptotic process; GO:0007050//cell cycle arrest	GO:0005730//nucleolus	GO:0003677//DNA binding	K23389 killin | (RefSeq) KLLN, CWS4, KILLIN; killin, p53 regulated DNA replication inhibitor	http://www.genome.jp/dbget-bin/www_bget?hsa:100144748	-0.432986	0.0153393	0.0239409	FALSE	1.11552	4.17419e-11	1.28011e-10	UP	-1.55306	4.35537e-20	1.91877e-19	DOWN
FAM183A	0	0	0	0	0	0	0	0	0	0	2	0.08161	0	0	0	0	0	0	chr1	43613594	43622067	FAM183A	440585	Protein FAM183A	-	-	-	no KO assigned | (RefSeq) FAM183A; family with sequence similarity 183 member A	http://www.genome.jp/dbget-bin/www_bget?hsa:440585	2.57928	0.511207	0.569478	FALSE	-	-	-	-	2.56066	0.511973	0.570784	FALSE
ARFRP1	1301	11.1097	1127	10.901	1145	10.1793	965	8.76037	965	8.1107	977	8.05746	1065	9.70615	1157	10.5636	1256	10.5649	chr20	62329995	62339365	ARFRP1	10139	adp-ribosylation factor-related protein 1 isoform x1	GO:0007264//small GTPase mediated signal transduction; GO:0007369//gastrulation; GO:0034067//protein localization to Golgi apparatus; GO:0042147//retrograde transport, endosome to Golgi; GO:0043001//Golgi to plasma membrane protein transport	GO:0005829//cytosol; GO:0032588//trans-Golgi network membrane	GO:0003924//GTPase activity; GO:0005515//protein binding; GO:0005525//GTP binding	K07952 ADP-ribosylation factor related protein 1 | (RefSeq) ARFRP1, ARL18, ARP, Arp1; ADP ribosylati	http://www.genome.jp/dbget-bin/www_bget?hsa:10139	-0.492234	3.84224e-14	1.31657e-13	FALSE	0.00359911	0.962003	0.991995	FALSE	-0.499701	1.31657e-13	4.48104e-13	FALSE
OVCH1	52	0.332125	35	0.253213	41	0.272628	66	0.44814	93	0.58464	105	0.64769	107	0.729383	118	0.805815	102	0.641728	chr12	29580489	29650619	OVCH1	341350	low quality protein: ovochymase-1	GO:0006508//proteolysis	GO:0005576//extracellular region	GO:0004252//serine-type endopeptidase activity; GO:0046872//metal ion binding	K01362 ovochymase [EC:3.4.21.-] | (RefSeq) OVCH1, OVCH; ovochymase 1	http://www.genome.jp/dbget-bin/www_bget?hsa:341350	0.844905	0.000132371	0.000261023	FALSE	1.39953	1.54012e-12	5.0449e-12	UP	-0.558982	0.00238896	0.00411578	FALSE
B4GALNT1	220	1.96066	237	2.39248	277	2.57009	1272	12.0515	1397	12.2542	1440	12.3943	168	1.59795	175	1.66753	215	1.88744	chr12	58019678	58027022	B4GALNT1	2583	beta- n-acetylgalactosaminyltransferase 1 isoform x3	GO:0001574//ganglioside biosynthetic process; GO:0005975//carbohydrate metabolic process; GO:0006486//protein glycosylation; GO:0007283//spermatogenesis; GO:0019915//lipid storage; GO:0030259//lipid glycosylation	GO:0005886//plasma membrane; GO:0030173//integral component of Golgi membrane	GO:0003947//(N-acetylneuraminyl)-galactosylglucosylceramide N-acetylgalactosaminyltransferase activity	K00725 (N-Acetylneuraminyl)-galactosylglucosylceramide N-acetylgalactosaminyltransferase [EC:2.4.1.9	http://www.genome.jp/dbget-bin/www_bget?hsa:2583	2.28549	1.47589e-147	4.59808e-146	UP	-0.358426	0.0119009	0.0194418	FALSE	2.63717	1.86146e-212	8.52659e-211	UP
TOR4A	4581	24.5921	3878	23.5811	4060	22.6908	6644	37.9173	6569	34.7091	6425	33.3111	3559	20.391	3519	20.1981	3916	20.7077	chr9	140172280	140177093	TOR4A	54863	torsin-4a	-	GO:0016021//integral component of membrane	GO:0005524//ATP binding	no KO assigned | (RefSeq) TOR4A, C9orf167; torsin family 4 member A	http://www.genome.jp/dbget-bin/www_bget?hsa:54863	0.456921	5.15929e-20	2.22937e-19	FALSE	-0.143961	0.000206462	0.00040965	FALSE	0.596962	2.90081e-34	1.91517e-33	FALSE
OR52I2	0	0	0	0	0	0	0	0	0	0	0	0	0	0	0	0	0	0	chr11	4608021	4609135	OR52I2	143502	olfactory receptor 52i2	GO:0007186//G-protein coupled receptor signaling pathway; GO:0050911//detection of chemical stimulus involved in sensory perception of smell	GO:0005886//plasma membrane; GO:0016021//integral component of membrane	GO:0004930//G-protein coupled receptor activity; GO:0004984//olfactory receptor activity	K04257 olfactory receptor | (RefSeq) OR52I2, OR11-12, OR52I1; olfactory receptor family 52 subfamily	http://www.genome.jp/dbget-bin/www_bget?hsa:143502	-	-	-	-	-	-	-	-	-	-	-	-
SPPL2A	2882	31.32	2497	30.7374	2771	31.3511	4907	56.6912	5178	55.3857	5408	56.7603	3416	39.6205	3354	38.9714	3697	39.5759	chr15	50999730	51057910	SPPL2A	84888	signal peptide peptidase-like 2a isoform x2	GO:0006465//signal peptide processing; GO:0006509//membrane protein ectodomain proteolysis; GO:0031293//membrane protein intracellular domain proteolysis; GO:0050776//regulation of immune response	GO:0005765//lysosomal membrane; GO:0005886//plasma membrane; GO:0030660//Golgi-associated vesicle membrane; GO:0031902//late endosome membrane; GO:0070062//extracellular exosome; GO:0071458//integral component of cytoplasmic side of endoplasmic reticulum membrane; GO:0071556//integral component of lumenal side of endoplasmic reticulum membrane	GO:0042500//aspartic endopeptidase activity, intramembrane cleaving; GO:0042803//protein homodimerization activity	K09596 signal peptide peptidase-like 2A [EC:3.4.23.-] | (RefSeq) SPPL2A, IMP3, PSL2; signal peptide	http://www.genome.jp/dbget-bin/www_bget?hsa:84888	0.73106	3.47581e-81	5.11752e-80	FALSE	0.404341	8.44579e-28	4.63126e-27	FALSE	0.322718	4.42288e-17	1.74878e-16	FALSE
SPPL2C	0	0	0	0	0	0	0	0	0	0	0	0	0	0	0	0	0	0	chr17	43922256	43924438	SPPL2C	162540	signal peptide peptidase-like 2c	GO:0006465//signal peptide processing; GO:0006509//membrane protein ectodomain proteolysis; GO:0031293//membrane protein intracellular domain proteolysis	GO:0005765//lysosomal membrane; GO:0030660//Golgi-associated vesicle membrane; GO:0071458//integral component of cytoplasmic side of endoplasmic reticulum membrane; GO:0071556//integral component of lumenal side of endoplasmic reticulum membrane	GO:0042500//aspartic endopeptidase activity, intramembrane cleaving; GO:0042803//protein homodimerization activity	K14212 signal peptide peptidase-like 2C [EC:3.4.23.-] | (RefSeq) SPPL2C, IMP5; signal peptide peptid	http://www.genome.jp/dbget-bin/www_bget?hsa:162540	-	-	-	-	-	-	-	-	-	-	-	-
SPPL2B	1570	9.0702	1263	8.26496	1353	8.13773	1428	8.77036	1425	8.10289	1405	7.83923	1069	6.59127	1116	6.89346	1266	7.2045	chr19	2328629	2355100	SPPL2B	56928	signal peptide peptidase-like 2b isoform x1	GO:0006465//signal peptide processing; GO:0006509//membrane protein ectodomain proteolysis; GO:0031293//membrane protein intracellular domain proteolysis; GO:0050776//regulation of immune response	GO:0000139//Golgi membrane; GO:0005654//nucleoplasm; GO:0005765//lysosomal membrane; GO:0005813//centrosome; GO:0005886//plasma membrane; GO:0010008//endosome membrane; GO:0015629//actin cytoskeleton; GO:0030660//Golgi-associated vesicle membrane; GO:0071458//integral component of cytoplasmic side of endoplasmic reticulum membrane; GO:0071556//integral component of lumenal side of endoplasmic ret…	GO:0042500//aspartic endopeptidase activity, intramembrane cleaving; GO:0042803//protein homodimerization activity	K09597 signal peptide peptidase-like 2B [EC:3.4.23.-] | (RefSeq) SPPL2B, IMP-4, IMP4, PSH4, PSL1; si	http://www.genome.jp/dbget-bin/www_bget?hsa:56928	-0.167595	0.00948475	0.0152464	FALSE	-0.234684	0.00012053	0.0002438	FALSE	0.063259	0.338774	0.404748	FALSE
ITGA8	0	0	0	0	0	0	0	0	2	0.00619319	0	0	9	0.0302199	0	0	2	0.00619812	chr10	15555948	15762334	ITGA8	8516	integrin alpha-8	GO:0001656//metanephros development; GO:0007160//cell-matrix adhesion; GO:0007229//integrin-mediated signaling pathway; GO:0007420//brain development; GO:0007613//memory; GO:0016337//single organismal cell-cell adhesion; GO:0030030//cell projection organization; GO:0030198//extracellular matrix organization; GO:0030511//positive regulation of transforming growth factor beta receptor signaling pat…	GO:0005783//endoplasmic reticulum; GO:0005925//focal adhesion; GO:0009986//cell surface; GO:0014069//postsynaptic density; GO:0032591//dendritic spine membrane; GO:0034678//integrin alpha8-beta1 complex; GO:0043204//perikaryon; GO:0045177//apical part of cell	GO:0046872//metal ion binding	K06584 integrin alpha 8 | (RefSeq) ITGA8; integrin subunit alpha 8	http://www.genome.jp/dbget-bin/www_bget?hsa:8516	2.58185	0.511207	0.569478	FALSE	4.94942	0.00250713	0.00445013	UP	-2.48808	0.0307283	0.0457025	DOWN
ITGA9	10	0.0551327	17	0.106164	18	0.103317	42	0.246168	47	0.255044	31	0.165064	24	0.141219	33	0.194527	33	0.179216	chr3	37493813	37861281	ITGA9	3680	integrin alpha-9	GO:0007155//cell adhesion; GO:0007229//integrin-mediated signaling pathway; GO:0030198//extracellular matrix organization; GO:0030593//neutrophil chemotaxis; GO:0042060//wound healing	GO:0009925//basal plasma membrane; GO:0034679//integrin alpha9-beta1 complex	GO:0005518//collagen binding; GO:0043236//laminin binding; GO:0046872//metal ion binding	K06585 integrin alpha 9 | (RefSeq) ITGA9, ALPHA-RLC, ITGA4L, RLC; integrin subunit alpha 9	http://www.genome.jp/dbget-bin/www_bget?hsa:3680	1.21055	0.000279282	0.000534096	UP	1.03053	0.00291995	0.00514501	UP	0.175007	0.541458	0.599908	FALSE
UGCG	2195	11.9508	2035	12.5501	2231	12.6459	2367	13.7004	2759	14.785	2828	14.8704	3096	17.9903	3257	18.9599	3217	17.2531	chr9	114659046	114697654	UGCG	7357	ceramide glucosyltransferase	GO:0006679//glucosylceramide biosynthetic process; GO:0008544//epidermis development; GO:1903955//positive regulation of protein targeting to mitochondrion	GO:0000139//Golgi membrane; GO:0016021//integral component of membrane	GO:0008120//ceramide glucosyltransferase activity	K00720 ceramide glucosyltransferase [EC:2.4.1.80] | (RefSeq) UGCG, GCS, GLCT1; UDP-glucose ceramide	http://www.genome.jp/dbget-bin/www_bget?hsa:7357	0.100992	0.0524394	0.0749571	FALSE	0.610249	8.30482e-37	5.66724e-36	FALSE	-0.513404	3.10487e-23	1.51057e-22	FALSE
MYO3B	0	0	2	0.00801767	0	0	0	0	2	0.00696684	0	0	0	0	0	0	0	0	chr2	171034655	171511674	MYO3B	140469	myosin-iiib isoform x2	GO:0006468//protein phosphorylation; GO:0007601//visual perception; GO:0050896//response to stimulus	GO:0005737//cytoplasm; GO:0016459//myosin complex	GO:0003774//motor activity; GO:0003779//actin binding; GO:0004674//protein serine/threonine kinase activity; GO:0005524//ATP binding	K08834 myosin III [EC:2.7.11.1] | (RefSeq) MYO3B; myosin IIIB	http://www.genome.jp/dbget-bin/www_bget?hsa:140469	-0.175988	1	1	FALSE	-2.65346	0.510174	0.576575	FALSE	2.5636	0.511973	0.570784	FALSE
ATP2A1	23	0.147548	32	0.232529	33	0.220399	123	0.838849	146	0.921865	74	0.458478	25	0.171167	20	0.13718	21	0.132703	chr16	28889809	28915830	ATP2A1	487	sarcoplasmic endoplasmic reticulum calcium atpase 1 isoform x1	GO:0008637//apoptotic mitochondrial changes; GO:0031448//positive regulation of fast-twitch skeletal muscle fiber contraction; GO:0032470//positive regulation of endoplasmic reticulum calcium ion concentration; GO:0032471//negative regulation of endoplasmic reticulum calcium ion concentration; GO:0045988//negative regulation of striated muscle contraction; GO:0051561//positive regulation of mitoc…	GO:0005739//mitochondrion; GO:0005793//endoplasmic reticulum-Golgi intermediate compartment; GO:0005887//integral component of plasma membrane; GO:0031095//platelet dense tubular network membrane; GO:0031673//H zone; GO:0031674//I band; GO:0033017//sarcoplasmic reticulum membrane; GO:0034704//calcium channel complex; GO:0048471//perinuclear region of cytoplasm	GO:0005388//calcium-transporting ATPase activity; GO:0005509//calcium ion binding; GO:0005524//ATP binding; GO:0042803//protein homodimerization activity	K05853 P-type Ca2+ transporter type 2A [EC:7.2.2.10] | (RefSeq) ATP2A1, ATP2A, SERCA1; ATPase sarcop	http://www.genome.jp/dbget-bin/www_bget?hsa:487	1.7625	8.07223e-09	2.13472e-08	UP	-0.374503	0.240297	0.305808	FALSE	2.13421	4.45789e-12	1.41762e-11	UP
ATP2A2	18864	65.0959	16724	65.3703	18775	67.451	15161	55.6186	16613	56.4256	17093	56.9664	21283	78.3839	21556	79.5324	23501	79.884	chr12	110719032	110788898	ATP2A2	488	sarcoplasmic endoplasmic reticulum calcium atpase 2 isoform x1	GO:0002026//regulation of the force of heart contraction; GO:0006984//ER-nucleus signaling pathway; GO:0006996//organelle organization; GO:0007155//cell adhesion; GO:0008544//epidermis development; GO:0010460//positive regulation of heart rate; GO:0010882//regulation of cardiac muscle contraction by calcium ion signaling; GO:0014883//transition between fast and slow fiber; GO:0014898//cardiac mus…	GO:0005887//integral component of plasma membrane; GO:0012506//vesicle membrane; GO:0014704//intercalated disc; GO:0014801//longitudinal sarcoplasmic reticulum; GO:0031095//platelet dense tubular network membrane; GO:0031234//extrinsic component of cytoplasmic side of plasma membrane; GO:0033017//sarcoplasmic reticulum membrane; GO:0043234//protein complex; GO:0048471//perinuclear region of cytop…	GO:0005509//calcium ion binding; GO:0005524//ATP binding; GO:0008022//protein C-terminus binding; GO:0019899//enzyme binding; GO:0031775//lutropin-choriogonadotropic hormone receptor binding; GO:0044548//S100 protein binding; GO:0086039//calcium-transporting ATPase activity involved in regulation of cardiac muscle cell membrane potential	K05853 P-type Ca2+ transporter type 2A [EC:7.2.2.10] | (RefSeq) ATP2A2, ATP2B, DAR, DD, SERCA2; ATPa	http://www.genome.jp/dbget-bin/www_bget?hsa:488	-0.350495	1.43551e-25	7.35002e-25	FALSE	0.330012	1.82336e-27	9.88441e-27	FALSE	-0.684585	2.05048e-99	3.67961e-98	FALSE
ATP2A3	9590	44.325	7937	41.5534	8627	41.5124	3167	15.5615	3207	14.5894	3189	14.2352	3177	15.6719	3372	16.6638	3343	15.2202	chr17	3827163	3867758	ATP2A3	489	ca++ ubiquitous	GO:0006874//cellular calcium ion homeostasis; GO:0070588//calcium ion transmembrane transport; GO:1903779//regulation of cardiac conduction	GO:0005887//integral component of plasma membrane; GO:0031095//platelet dense tubular network membrane; GO:0031965//nuclear membrane; GO:0033017//sarcoplasmic reticulum membrane	GO:0005388//calcium-transporting ATPase activity; GO:0005524//ATP binding; GO:0046872//metal ion binding	K05853 P-type Ca2+ transporter type 2A [EC:7.2.2.10] | (RefSeq) ATP2A3, SERCA3; ATPase sarcoplasmic/	http://www.genome.jp/dbget-bin/www_bget?hsa:489	-1.64436	2.7564e-305	2.3199e-303	DOWN	-1.35666	1.77451e-234	9.80813e-233	DOWN	-0.291654	8.26463e-09	2.20762e-08	FALSE
ITGA1	1387	6.31715	1174	6.05666	1277	6.05513	178	0.86186	236	1.05795	221	0.972114	2145	10.4267	2035	9.9098	2231	10.0092	chr5	52084136	52249485	ITGA1	3672	integrin alpha-1	GO:0000187//activation of MAPK activity; GO:0006936//muscle contraction; GO:0007160//cell-matrix adhesion; GO:0007229//integrin-mediated signaling pathway; GO:0008285//negative regulation of cell proliferation; GO:0030198//extracellular matrix organization; GO:0030593//neutrophil chemotaxis; GO:0032516//positive regulation of phosphoprotein phosphatase activity; GO:0042059//negative regulation of…	GO:0001669//acrosomal vesicle; GO:0005581//collagen trimer; GO:0005634//nucleus; GO:0005925//focal adhesion; GO:0009897//external side of plasma membrane; GO:0034665//integrin alpha1-beta1 complex; GO:0043005//neuron projection; GO:0043204//perikaryon; GO:0045121//membrane raft; GO:0045178//basal part of cell; GO:0070062//extracellular exosome	GO:0004519//endonuclease activity; GO:0005102//receptor binding; GO:0019903//protein phosphatase binding; GO:0046872//metal ion binding; GO:0098639//collagen binding involved in cell-matrix adhesion	K06480 integrin alpha 1 | (RefSeq) ITGA1, CD49a, VLA1; integrin subunit alpha 1	http://www.genome.jp/dbget-bin/www_bget?hsa:3672	-2.79136	1.08181e-240	6.51281e-239	DOWN	0.784242	4.33571e-60	4.67297e-59	FALSE	-3.57966	0	0	DOWN
ITGA2	819	2.27346	681	2.14127	703	2.03164	8077	23.8356	9437	25.7838	9972	26.7342	1566	4.63949	1304	3.87024	1522	4.16171	chr5	52285156	52390609	ITGA2	3673	integrin alpha-2	GO:0001666//response to hypoxia; GO:0002687//positive regulation of leukocyte migration; GO:0006929//substrate-dependent cell migration; GO:0006971//hypotonic response; GO:0007229//integrin-mediated signaling pathway; GO:0007565//female pregnancy; GO:0007596//blood coagulation; GO:0010634//positive regulation of epithelial cell migration; GO:0010694//positive regulation of alkaline phosphatase ac…	GO:0005634//nucleus; GO:0005925//focal adhesion; GO:0009897//external side of plasma membrane; GO:0030424//axon; GO:0034666//integrin alpha2-beta1 complex; GO:0043679//axon terminus; GO:0045178//basal part of cell; GO:0048471//perinuclear region of cytoplasm	GO:0001618//virus receptor activity; GO:0005178//integrin binding; GO:0038064//collagen receptor activity; GO:0043236//laminin binding; GO:0046872//metal ion binding; GO:0046982//protein heterodimerization activity; GO:0098639//collagen binding involved in cell-matrix adhesion	K06481 integrin alpha 2 | (RefSeq) ITGA2, BR, CD49B, GPIa, HPA-5, VLA-2, VLAA2; integrin subunit alp	http://www.genome.jp/dbget-bin/www_bget?hsa:3673	3.44299	0	0	UP	1.03975	9.72408e-43	7.59885e-42	UP	2.39938	0	0	UP
ITGA3	20569	89.2355	17618	86.5767	18990	85.7704	12405	57.2128	12610	53.8452	13496	56.547	5086	23.5491	5383	24.9692	5857	25.0295	chr17	48133332	48167849	ITGA3	3675	integrin alpha-3 isoform x2	GO:0001764//neuron migration; GO:0007160//cell-matrix adhesion; GO:0007229//integrin-mediated signaling pathway; GO:0007507//heart development; GO:0007613//memory; GO:0010628//positive regulation of gene expression; GO:0010634//positive regulation of epithelial cell migration; GO:0010811//positive regulation of cell-substrate adhesion; GO:0010976//positive regulation of neuron projection developm…	GO:0005925//focal adhesion; GO:0009897//external side of plasma membrane; GO:0016323//basolateral plasma membrane; GO:0030426//growth cone; GO:0031527//filopodium membrane; GO:0034667//integrin alpha3-beta1 complex; GO:0048471//perinuclear region of cytoplasm; GO:0060076//excitatory synapse; GO:0070062//extracellular exosome; GO:0071438//invadopodium membrane; GO:0097060//synaptic membrane	GO:0001948//glycoprotein binding; GO:0001968//fibronectin binding; GO:0002020//protease binding; GO:0005178//integrin binding; GO:0005518//collagen binding; GO:0019904//protein domain specific binding; GO:0043236//laminin binding; GO:0046872//metal ion binding; GO:0046982//protein heterodimerization activity	K06482 integrin alpha 3 | (RefSeq) ITGA3, CD49C, FRP-2, GAP-B3, GAPB3, ILNEB, MSK18, VCA-2, VL3A, VL	http://www.genome.jp/dbget-bin/www_bget?hsa:3675	-0.765069	2.99167e-99	5.61087e-98	FALSE	-1.76511	0	0	DOWN	0.996069	4.04597e-135	9.99379e-134	FALSE
ITGA4	1087	5.28701	867	4.77661	1067	5.40298	1242	6.42206	1229	5.88356	1305	6.13015	1168	6.06314	1183	6.15207	1269	6.07989	chr2	182321619	182403655	ITGA4	3676	integrin alpha-4	GO:0003366//cell-matrix adhesion involved in ameboidal cell migration; GO:0007229//integrin-mediated signaling pathway; GO:0030183//B cell differentiation; GO:0030198//extracellular matrix organization; GO:0034113//heterotypic cell-cell adhesion; GO:0034446//substrate adhesion-dependent cell spreading; GO:0035987//endodermal cell differentiation; GO:0043113//receptor clustering; GO:0050776//regul…	GO:0005925//focal adhesion; GO:0009986//cell surface; GO:0034669//integrin alpha4-beta7 complex; GO:0070062//extracellular exosome	GO:0001968//fibronectin binding; GO:0015026//coreceptor activity; GO:0019960//C-X3-C chemokine binding; GO:0046872//metal ion binding; GO:0050839//cell adhesion molecule binding; GO:1990405//protein antigen binding	K06483 integrin alpha 4 | (RefSeq) ITGA4, CD49D, IA4; integrin subunit alpha 4	http://www.genome.jp/dbget-bin/www_bget?hsa:3676	0.12922	0.0508982	0.0728711	FALSE	0.306516	8.8116e-07	2.10721e-06	FALSE	-0.18142	0.00297874	0.0050717	FALSE
RIT2	0	0	0	0	0	0	0	0	0	0	0	0	0	0	0	0	0	0	chr18	40323183	40695657	RIT2	6014	gtp-binding protein rit2	GO:0007264//small GTPase mediated signal transduction; GO:0007268//synaptic transmission	GO:0005634//nucleus; GO:0005886//plasma membrane	GO:0003924//GTPase activity; GO:0005516//calmodulin binding; GO:0005525//GTP binding	K07833 Ras-like without CAAX 2 | (RefSeq) RIT2, RIBA, RIN, ROC2; Ras like without CAAX 2	http://www.genome.jp/dbget-bin/www_bget?hsa:6014	-	-	-	-	-	-	-	-	-	-	-	-
RIT1	3085	20.0977	2855	21.0677	2905	19.7026	5913	40.9515	6894	44.2048	6879	43.2808	5034	35.0008	5173	36.032	5552	35.6281	chr1	155867599	155881193	RIT1	6016	gtp-binding protein rit1 isoform x2	GO:0003334//keratinocyte development; GO:0003382//epithelial cell morphogenesis; GO:0007265//Ras protein signal transduction; GO:0008285//negative regulation of cell proliferation; GO:0010837//regulation of keratinocyte proliferation; GO:0019216//regulation of lipid metabolic process; GO:0021773//striatal medium spiny neuron differentiation; GO:0021902//commitment of neuronal cell to specific neu…	GO:0005634//nucleus; GO:0005886//plasma membrane; GO:0043005//neuron projection	GO:0000978//RNA polymerase II core promoter proximal region sequence-specific DNA binding; GO:0001077//transcriptional activator activity, RNA polymerase II core promoter proximal region sequence-specific binding; GO:0005516//calmodulin binding; GO:0005525//GTP binding; GO:0046872//metal ion binding	K07832 Ras-like without CAAX 1 | (RefSeq) RIT1, NS8, RIBB, RIT, ROC1; Ras like without CAAX 1	http://www.genome.jp/dbget-bin/www_bget?hsa:6016	0.955136	2.78218e-101	5.34843e-100	FALSE	0.874929	2.66789e-111	5.50007e-110	FALSE	0.0762896	0.0666662	0.0934218	FALSE
ITGA7	6252	34.3649	5314	33.0855	6080	34.7927	1353	7.90616	1551	8.39104	1340	7.11346	3228	18.9367	3141	18.4595	3609	19.5405	chr12	56078352	56106089	ITGA7	3679	integrin alpha-7 isoform x3	GO:0007160//cell-matrix adhesion; GO:0007229//integrin-mediated signaling pathway; GO:0007517//muscle organ development; GO:0008360//regulation of cell shape; GO:0030198//extracellular matrix organization; GO:0034113//heterotypic cell-cell adhesion; GO:0035987//endodermal cell differentiation	GO:0008305//integrin complex; GO:0009986//cell surface	GO:0005515//protein binding; GO:0046872//metal ion binding	K06583 integrin alpha 7 | (RefSeq) ITGA7; integrin subunit alpha 7	http://www.genome.jp/dbget-bin/www_bget?hsa:3679	-2.24982	0	0	DOWN	-0.779187	4.99911e-98	8.91428e-97	FALSE	-1.47443	5.87704e-136	1.46658e-134	DOWN
TRHR	2	0.0308743	0	0	0	0	2	0.0328223	0	0	2	0.0298179	0	0	0	0	1	0.0152062	chr8	110099653	110131813	TRHR	7201	thyrotropin-releasing hormone receptor	GO:0007186//G-protein coupled receptor signaling pathway	GO:0005887//integral component of plasma membrane	GO:0004997//thyrotropin-releasing hormone receptor activity	K04282 thyrotropin-releasing hormone receptor | (RefSeq) TRHR, CHNG7, TRH-R; thyrotropin releasing h	http://www.genome.jp/dbget-bin/www_bget?hsa:7201	0.718107	0.707207	0.754767	FALSE	-0.751082	1	1	FALSE	1.47628	0.403906	0.47413	FALSE
LOC102724957	0	0	0	0	0	0	0	0	0	0	0	0	0	0	0	0	0	0	chr11	15665431	15726914	LOC102724957	102724957	-	-	-	-	no KO assigned | (RefSeq) uncharacterized LOC102724957	http://www.genome.jp/dbget-bin/www_bget?hsa:102724957	-	-	-	-	-	-	-	-	-	-	-	-
DENND4A	6266	15.5713	5518	15.5323	6335	16.3897	3072	8.11574	3454	8.44822	3256	7.81447	2573	6.82415	2401	6.37944	2813	6.88586	chr15	65951461	66084631	DENND4A	10260	c-myc promoter-binding protein isoform x1	GO:0006355//regulation of transcription, DNA-templated; GO:0043547//positive regulation of GTPase activity	GO:0005634//nucleus	GO:0003677//DNA binding; GO:0017112//Rab guanyl-nucleotide exchange factor activity	K20163 DENN domain-containing protein 4 | (RefSeq) DENND4A, IRLB, MYCPBP; DENN domain containing 4A	http://www.genome.jp/dbget-bin/www_bget?hsa:10260	-1.0849	6.61543e-141	1.90005e-139	DOWN	-1.17584	3.2602e-179	1.21342e-177	DOWN	0.0869978	0.0779737	0.107441	FALSE
DENND4B	4649	17.8535	4221	18.3611	4216	16.8559	6539	26.6961	6866	25.9523	7018	26.029	5322	21.8129	5395	22.1519	6164	23.3174	chr1	153901977	153919154	DENND4B	9909	denn domain-containing protein 4b isoform x2	GO:0032483//regulation of Rab protein signal transduction; GO:0043547//positive regulation of GTPase activity	GO:0005634//nucleus; GO:0005794//Golgi apparatus	GO:0017112//Rab guanyl-nucleotide exchange factor activity	K20163 DENN domain-containing protein 4 | (RefSeq) DENND4B, KIAA0476; DENN domain containing 4B	http://www.genome.jp/dbget-bin/www_bget?hsa:9909	0.44538	3.86509e-27	2.08434e-26	FALSE	0.407894	5.33721e-22	2.47202e-21	FALSE	0.0334145	0.402102	0.472797	FALSE
CT55	0	0	0	0	5	0.0563457	3	0.034522	2	0.0213079	5	0.05227	4	0.0462101	0	0	6	0.0639745	chrX	134290461	134305751	CT55	54967	cancer testis antigen 55	-	-	GO:0005515//protein binding	no KO assigned | (RefSeq) CT55, BJHCC20A, CXorf48; cancer/testis antigen 55	http://www.genome.jp/dbget-bin/www_bget?hsa:54967	0.764184	0.488044	0.560353	FALSE	0.98344	0.368278	0.446252	FALSE	-0.226706	0.855977	0.890727	FALSE
SWAP70	1781	8.11333	1612	8.31803	1832	8.68858	3366	16.3013	3700	16.5899	4042	17.7833	2731	13.2779	2570	12.5177	2822	12.6633	chr11	9685624	9774538	SWAP70	23075	switch-associated protein 70 isoform x1	GO:0007204//positive regulation of cytosolic calcium ion concentration; GO:0030835//negative regulation of actin filament depolymerization; GO:0032233//positive regulation of actin filament bundle assembly; GO:0032880//regulation of protein localization; GO:0033633//negative regulation of cell-cell adhesion mediated by integrin; GO:0045190//isotype switching; GO:0060754//positive regulation of ma…	GO:0005634//nucleus; GO:0005829//cytosol; GO:0005856//cytoskeleton; GO:0005886//plasma membrane; GO:0030027//lamellipodium	GO:0003677//DNA binding; GO:0005509//calcium ion binding; GO:0005515//protein binding; GO:0005524//ATP binding	K20072 switch-associated protein 70 | (RefSeq) SWAP70, HSPC321, SWAP-70; switching B cell complex su	http://www.genome.jp/dbget-bin/www_bget?hsa:23075	0.890026	8.2626e-67	9.90633e-66	FALSE	0.679628	5.95966e-46	5.02284e-45	FALSE	0.206353	1.67093e-05	3.55213e-05	FALSE
RARRES1	9	0.163147	16	0.328531	13	0.24534	8	0.15417	13	0.231947	17	0.297623	8	0.154775	4	0.0775269	12	0.214275	chr3	158414897	158450275	RARRES1	5918	retinoic acid receptor responder protein 1 isoform x1	GO:0008285//negative regulation of cell proliferation	GO:0016021//integral component of membrane; GO:0070062//extracellular exosome	-	K23595 retinoic acid receptor responder protein 1 | (RefSeq) RARRES1, LXNL, PERG-1, TIG1; retinoic a	http://www.genome.jp/dbget-bin/www_bget?hsa:5918	-0.207742	0.653247	0.706675	FALSE	-0.628051	0.197754	0.256694	FALSE	0.414197	0.425792	0.497313	FALSE
PHLDA1	97505	360.199	84657	354.241	95281	366.446	111130	436.435	119190	433.375	126427	451.062	92011	362.769	91189	360.175	98024	356.699	chr12	76419227	76425556	PHLDA1	22822	pleckstrin homology-like domain family a member 1	GO:0000086//G2/M transition of mitotic cell cycle; GO:0021879//forebrain neuron differentiation; GO:0043065//positive regulation of apoptotic process; GO:0045210//FasL biosynthetic process	GO:0005730//nucleolus; GO:0005829//cytosol; GO:0031410//cytoplasmic vesicle	GO:0005515//protein binding	K23793 | (RefSeq) PHLDA1, DT1P1B11, PHRIP, TDAG51; pleckstrin homology like domain family A member 1	http://www.genome.jp/dbget-bin/www_bget?hsa:22822	0.16652	2.92075e-07	6.99666e-07	FALSE	0.0635022	0.0223956	0.0350876	FALSE	0.0989423	0.00176963	0.0030933	FALSE
PHLDA3	5918	47.4212	5185	47.0616	5266	43.9306	2276	19.3884	2282	17.9979	2177	16.8475	2690	23.0051	2679	22.9523	3207	25.3134	chr1	201433412	201438299	PHLDA3	23612	pleckstrin homology-like domain family a member 3	GO:0009653//anatomical structure morphogenesis; GO:0042771//intrinsic apoptotic signaling pathway in response to DNA damage by p53 class mediator; GO:0043065//positive regulation of apoptotic process; GO:0051898//negative regulation of protein kinase B signaling	GO:0005737//cytoplasm; GO:0005886//plasma membrane; GO:0070062//extracellular exosome	GO:0005546//phosphatidylinositol-4,5-bisphosphate binding; GO:0005547//phosphatidylinositol-3,4,5-trisphosphate binding; GO:0010314//phosphatidylinositol-5-phosphate binding; GO:0032266//phosphatidylinositol-3-phosphate binding; GO:0043325//phosphatidylinositol-3,4-bisphosphate binding; GO:0080025//phosphatidylinositol-3,5-bisphosphate binding	K23793 | (RefSeq) PHLDA3, TIH1; pleckstrin homology like domain family A member 3	http://www.genome.jp/dbget-bin/www_bget?hsa:23612	-1.47514	7.38136e-177	2.85745e-175	DOWN	-0.891802	2.11624e-81	3.15483e-80	FALSE	-0.58694	1.40651e-22	6.70469e-22	FALSE
UFSP2	708	6.50074	661	6.87466	674	6.44284	202	1.97175	286	2.58466	249	2.20805	396	3.8806	392	3.84832	510	4.61267	chr4	186320694	186347139	UFSP2	55325	ufm1-specific protease 2	GO:0006508//proteolysis; GO:0033146//regulation of intracellular estrogen receptor signaling pathway	GO:0005634//nucleus; GO:0005783//endoplasmic reticulum	GO:0005515//protein binding; GO:0016790//thiolester hydrolase activity; GO:0071567//UFM1 hydrolase activity	K01376 UFM1-specific protease 2 [EC:3.4.22.-] | (RefSeq) UFSP2, BHD, C4orf20, SEMDDR; UFM1 specific	http://www.genome.jp/dbget-bin/www_bget?hsa:55325	-1.6704	5.01848e-59	5.3597e-58	DOWN	-0.61583	9.33793e-12	2.94512e-11	FALSE	-1.05839	3.03589e-17	1.20994e-16	DOWN
TAP2	5467	25.6815	4599	24.4712	4929	24.1056	10746	53.6648	11766	54.4011	11215	50.8804	8258	41.4019	8027	40.3162	9049	41.8721	chr6	32789610	32806600	TAP2	6891	transporter atp-binding sub-family b isoform 1 variant	GO:0001916//positive regulation of T cell mediated cytotoxicity; GO:0002237//response to molecule of bacterial origin; GO:0002481//antigen processing and presentation of exogenous protein antigen via MHC class Ib, TAP-dependent; GO:0002485//antigen processing and presentation of endogenous peptide antigen via MHC class I via ER pathway, TAP-dependent; GO:0002489//antigen processing and presentati…	GO:0042613//MHC class II protein complex; GO:0042825//TAP complex; GO:0043657//host cell; GO:0070062//extracellular exosome	GO:0005524//ATP binding; GO:0008289//lipid binding; GO:0015197//peptide transporter activity; GO:0015433//peptide antigen-transporting ATPase activity; GO:0023029//MHC class Ib protein binding; GO:0046978//TAP1 binding; GO:0046980//tapasin binding	K05654 ATP-binding cassette, subfamily B (MDR/TAP), member 3 | (RefSeq) TAP2, ABC18, ABCB3, APT2, D6	http://www.genome.jp/dbget-bin/www_bget?hsa:6891	0.974997	6.96013e-126	1.75738e-124	FALSE	0.800098	1.98693e-116	4.42525e-115	FALSE	0.170926	8.9016e-06	1.94315e-05	FALSE
GAP43	0	0	2	0.0259628	0	0	0	0	0	0	0	0	0	0	0	0	0	0	chr3	115342151	115440334	GAP43	2596	growth associated protein 43	GO:0007205//protein kinase C-activating G-protein coupled receptor signaling pathway; GO:0010001//glial cell differentiation; GO:0016198//axon choice point recognition; GO:0040008//regulation of growth; GO:0042246//tissue regeneration; GO:0045165//cell fate commitment; GO:0051489//regulation of filopodium assembly	GO:0005737//cytoplasm; GO:0014069//postsynaptic density; GO:0030054//cell junction; GO:0030424//axon; GO:0031527//filopodium membrane; GO:0032584//growth cone membrane	GO:0001786//phosphatidylserine binding; GO:0005516//calmodulin binding; GO:0035727//lysophosphatidic acid binding; GO:1901981//phosphatidylinositol phosphate binding	K20041 neuromodulin | (RefSeq) GAP43, B-50, PP46; growth associated protein 43	http://www.genome.jp/dbget-bin/www_bget?hsa:2596	-2.75784	0.511207	0.569478	FALSE	-2.65346	0.510174	0.576575	FALSE	-	-	-	-
PAMR1	4	0.0284978	2	0.0161399	2	0.0148344	0	0	0	0	0	0	2	0.0152074	0	0	0	0	chr11	35453374	35551848	PAMR1	25891	inactive serine protease pamr1 isoform x1	GO:0006508//proteolysis	GO:0005576//extracellular region	GO:0004252//serine-type endopeptidase activity; GO:0005509//calcium ion binding	no KO assigned | (RefSeq) PAMR1, DKFZP586H2123, FP938, RAMP; peptidase domain containing associated	http://www.genome.jp/dbget-bin/www_bget?hsa:25891	-4.5736	0.013537	0.0212695	DOWN	-1.77188	0.144969	0.193521	FALSE	-2.77386	0.511973	0.570784	FALSE
MRPL28	1004	19.2377	965	20.9443	996	19.8686	1410	28.7217	1485	28.0061	1404	25.9816	1196	24.4582	1210	24.7891	1302	24.5744	chr16	417384	420569	MRPL28	10573	39s ribosomal protein mitochondrial	GO:0070125//mitochondrial translational elongation; GO:0070126//mitochondrial translational termination	GO:0005743//mitochondrial inner membrane; GO:0005762//mitochondrial large ribosomal subunit	GO:0003735//structural constituent of ribosome; GO:0005515//protein binding; GO:0044822//poly(A) RNA binding	K02902 large subunit ribosomal protein L28 | (RefSeq) MRPL28, MAAT1, p15; mitochondrial ribosomal pr	http://www.genome.jp/dbget-bin/www_bget?hsa:10573	0.339367	1.49068e-07	3.65053e-07	FALSE	0.363907	1.73328e-09	4.89504e-09	FALSE	-0.0284778	0.644682	0.697861	FALSE
HRH4	14	0.0867546	6	0.0421149	7	0.0451597	6	0.0395265	16	0.0975871	1	0.00598473	6	0.0396817	3	0.0198766	7	0.0427283	chr18	22040593	22059921	HRH4	59340	histamine h4 receptor	GO:0006954//inflammatory response; GO:0007197//adenylate cyclase-inhibiting G-protein coupled acetylcholine receptor signaling pathway; GO:0007204//positive regulation of cytosolic calcium ion concentration; GO:0007207//phospholipase C-activating G-protein coupled acetylcholine receptor signaling pathway; GO:0007271//synaptic transmission, cholinergic; GO:0043408//regulation of MAPK cascade	GO:0005886//plasma membrane; GO:0016021//integral component of membrane; GO:0045202//synapse	GO:0004969//histamine receptor activity; GO:0016907//G-protein coupled acetylcholine receptor activity	K04152 histamine receptor H4 | (RefSeq) HRH4, AXOR35, BG26, GPCR105, GPRv53, H4, H4R, HH4R; histamin	http://www.genome.jp/dbget-bin/www_bget?hsa:59340	-0.40736	0.631079	0.686116	FALSE	-0.693234	0.249208	0.315916	FALSE	0.281758	0.727966	0.774837	FALSE
FBXL12	748	8.69558	814	10.7187	804	9.73064	1072	13.2484	1112	12.7236	1110	12.4624	773	9.59071	778	9.67013	809	9.26401	chr19	9920943	9929779	FBXL12	54850	f-box lrr-repeat protein 12 isoform x1	GO:0006511//ubiquitin-dependent protein catabolic process; GO:0016567//protein ubiquitination	GO:0000151//ubiquitin ligase complex; GO:0005737//cytoplasm; GO:0016021//integral component of membrane	GO:0005515//protein binding	K10278 F-box and leucine-rich repeat protein 12 | (RefSeq) FBXL12, Fbl12; F-box and leucine rich rep	http://www.genome.jp/dbget-bin/www_bget?hsa:54850	0.277439	0.000547279	0.00101718	FALSE	0.0350172	0.687581	0.748204	FALSE	0.238087	0.000291067	0.000553412	FALSE
HRH2	72	0.556721	82	0.71819	95	0.764746	353	2.9017	374	2.84633	356	2.65849	88	0.72621	71	0.586975	76	0.578858	chr5	175085040	175113245	HRH2	3274	histamine h2 receptor isoform x1	GO:0001697//histamine-induced gastric acid secretion; GO:0001698//gastrin-induced gastric acid secretion; GO:0003382//epithelial cell morphogenesis; GO:0006955//immune response; GO:0007187//G-protein coupled receptor signaling pathway, coupled to cyclic nucleotide second messenger; GO:0007613//memory; GO:0008542//visual learning; GO:0045907//positive regulation of vasoconstriction; GO:0048167//re…	GO:0005887//integral component of plasma membrane	GO:0004969//histamine receptor activity	K04150 histamine receptor H2 | (RefSeq) HRH2, H2R, HH2R; histamine receptor H2	http://www.genome.jp/dbget-bin/www_bget?hsa:3274	1.92214	5.65925e-45	4.68154e-44	UP	-0.0423868	0.855352	0.89607	FALSE	1.95965	6.96184e-48	6.17482e-47	UP
CYP27B1	611	5.36648	498	4.95447	497	4.54457	1308	12.2132	1435	12.4053	1422	12.0622	4148	38.8831	4287	40.2585	4669	40.3948	chr12	58156117	58160976	CYP27B1	1594	25-hydroxyvitamin d-1 alpha mitochondrial	GO:0006816//calcium ion transport; GO:0008285//negative regulation of cell proliferation; GO:0010956//negative regulation of calcidiol 1-monooxygenase activity; GO:0010980//positive regulation of vitamin D 24-hydroxylase activity; GO:0030308//negative regulation of cell growth; GO:0030500//regulation of bone mineralization; GO:0032496//response to lipopolysaccharide; GO:0034341//response to inter…	GO:0005741//mitochondrial outer membrane	GO:0004498//calcidiol 1-monooxygenase activity; GO:0005506//iron ion binding; GO:0020037//heme binding	K07438 calcidiol 1-monooxygenase (25-hydroxyvitamin D3 1alpha-hydroxylase) [EC:1.14.15.18] | (RefSeq	http://www.genome.jp/dbget-bin/www_bget?hsa:1594	1.1796	7.07436e-62	7.87867e-61	UP	3.07175	0	0	UP	-1.89635	0	0	DOWN
FBXL17	1057	4.44013	961	4.57261	1034	4.52199	675	3.01437	632	2.61304	666	2.70193	725	3.25037	754	3.38647	799	3.30613	chr5	107194734	107717799	FBXL17	64839	F-box/LRR-repeat protein 17	-	-	-	K10283 F-box and leucine-rich repeat protein 17 | (RefSeq) FBXL17, FBXO13, Fbl17, Fbx13; F-box and l	http://www.genome.jp/dbget-bin/www_bget?hsa:64839	-0.824114	6.26113e-30	3.63322e-29	FALSE	-0.379365	1.97768e-09	5.57012e-09	FALSE	-0.448549	1.16888e-08	3.09261e-08	FALSE
HRH1	1888	9.38782	1713	9.64806	1860	9.62861	2087	11.0321	2601	12.7295	2393	11.4917	3234	17.1623	3630	19.2986	3521	17.2457	chr3	11178779	11304939	HRH1	3269	histamine h1 receptor	GO:0006954//inflammatory response; GO:0007200//phospholipase C-activating G-protein coupled receptor signaling pathway; GO:0007613//memory; GO:0008542//visual learning; GO:0032962//positive regulation of inositol trisphosphate biosynthetic process; GO:0043114//regulation of vascular permeability; GO:0045907//positive regulation of vasoconstriction; GO:0048016//inositol phosphate-mediated signalin…	GO:0005654//nucleoplasm; GO:0005737//cytoplasm; GO:0005887//integral component of plasma membrane	GO:0004969//histamine receptor activity	K04149 histamine receptor H1 | (RefSeq) HRH1, H1-R, H1R, HH1R, hisH1; histamine receptor H1	http://www.genome.jp/dbget-bin/www_bget?hsa:3269	0.176364	0.00291379	0.0050089	FALSE	0.970995	2.19073e-76	3.07571e-75	FALSE	-0.79878	2.69131e-37	1.9025e-36	FALSE
FBXL19	2370	13.8792	1968	13.0545	2144	13.0716	3598	22.4	3770	21.7302	3849	21.7692	3222	20.1379	3101	19.4166	3588	20.6976	chr16	30934376	30960104	FBXL19	54620	f-box lrr-repeat protein 19 isoform x4	GO:0043161//proteasome-mediated ubiquitin-dependent protein catabolic process	GO:0019005//SCF ubiquitin ligase complex	GO:0003677//DNA binding; GO:0005515//protein binding; GO:0008270//zinc ion binding	K10285 F-box and leucine-rich repeat protein 19 | (RefSeq) FBXL19, CXXC11, Fbl19, JHDM1C; F-box and	http://www.genome.jp/dbget-bin/www_bget?hsa:54620	0.596735	2.88811e-42	2.25569e-41	FALSE	0.655937	7.7871e-52	7.41156e-51	FALSE	-0.0631437	0.139729	0.184501	FALSE
FBXL18	1103	4.22026	1016	4.40329	987	3.9316	1255	5.10481	1375	5.17815	1227	4.53407	1404	5.7333	1341	5.4859	1526	5.75137	chr7	5515428	5553429	FBXL18	80028	f-box lrr-repeat protein 18	-	-	GO:0005515//protein binding	K10284 F-box and leucine-rich repeat protein 18 | (RefSeq) FBXL18, Fbl18; F-box and leucine rich rep	http://www.genome.jp/dbget-bin/www_bget?hsa:80028	0.116284	0.1031	0.139598	FALSE	0.500778	6.25075e-17	2.43488e-16	FALSE	-0.388269	2.63375e-09	7.25177e-09	FALSE
ACVRL1	651	3.38979	560	3.30294	608	3.29597	798	4.4174	807	4.13593	818	4.11363	341	1.89505	342	1.90403	358	1.83623	chr12	52301202	52317145	ACVRL1	94	serine threonine-protein kinase receptor r3	GO:0001701//in utero embryonic development; GO:0001937//negative regulation of endothelial cell proliferation; GO:0001938//positive regulation of endothelial cell proliferation; GO:0001946//lymphangiogenesis; GO:0001955//blood vessel maturation; GO:0001974//blood vessel remodeling; GO:0002043//blood vessel endothelial cell proliferation involved in sprouting angiogenesis; GO:0006275//regulation o…	GO:0005887//integral component of plasma membrane; GO:0009986//cell surface; GO:0030425//dendrite; GO:0043025//neuronal cell body	GO:0004702//receptor signaling protein serine/threonine kinase activity; GO:0005025//transforming growth factor beta receptor activity, type I; GO:0005524//ATP binding; GO:0016361//activin receptor activity, type I; GO:0019901//protein kinase binding; GO:0046332//SMAD binding; GO:0046872//metal ion binding; GO:0048185//activin binding; GO:0050431//transforming growth factor beta binding; GO:00988…	K13594 activin receptor-like kinase 1 [EC:2.7.11.30] | (RefSeq) ACVRL1, ACVRLK1, ALK-1, ALK1, HHT, H	http://www.genome.jp/dbget-bin/www_bget?hsa:94	0.219039	0.00247363	0.004299	FALSE	-0.760959	1.06459e-20	4.71553e-20	FALSE	0.976134	2.67627e-33	1.73325e-32	FALSE
FAM169B	0	0	0	0	0	0	0	0	0	0	0	0	0	0	0	0	0	0	chr15	98980391	99057611	FAM169B	283777	Protein FAM169B	-	-	-	no KO assigned | (RefSeq) FAM169B; family with sequence similarity 169 member B	http://www.genome.jp/dbget-bin/www_bget?hsa:283777	-	-	-	-	-	-	-	-	-	-	-	-
CGB3	0	0	3	0.0807699	0	0	1	0.0252686	0	0	0	0	0	0	1	0.0254135	1	0.0234132	chr19	49526126	49527632	CGB3	1082	chorionic beta polypeptide 5	-	GO:0005576//extracellular region	GO:0005179//hormone activity	K10045 chorionic gonadotropin, beta polypeptide | (RefSeq) CGB3, CGB, CGB5, CGB7, CGB8, hCGB; chorio	http://www.genome.jp/dbget-bin/www_bget?hsa:1082	-1.46368	0.641269	0.695452	FALSE	-0.483091	1	1	FALSE	-0.974527	1	1	FALSE
LRRC7	0	0	2	0.0070865	0	0	6	0.0199529	8	0.0246309	6	0.0181265	4	0.0133541	6	0.0200673	2	0.00616262	chr1	70032868	70589171	LRRC7	57554	leucine-rich repeat-containing protein 7 isoform x1	GO:0010976//positive regulation of neuron projection development; GO:0014070//response to organic cyclic compound	GO:0005737//cytoplasm; GO:0014069//postsynaptic density; GO:0015629//actin cytoskeleton; GO:0030054//cell junction; GO:0030175//filopodium; GO:0043194//axon initial segment; GO:0043197//dendritic spine; GO:0045211//postsynaptic membrane	GO:0008022//protein C-terminus binding	no KO assigned | (RefSeq) LRRC7, DENSIN; leucine rich repeat containing 7	http://www.genome.jp/dbget-bin/www_bget?hsa:57554	2.916	0.00107284	0.00193427	UP	2.41952	0.0276588	0.042635	UP	0.477189	0.537977	0.596528	FALSE
GHDC	870	7.62903	675	6.70462	776	7.08435	1319	12.2961	1290	11.1339	1248	10.5693	582	5.44687	512	4.80038	624	5.38999	chr17	40341105	40346550	GHDC	84514	gh3 domain-containing protein	-	GO:0005635//nuclear envelope; GO:0005783//endoplasmic reticulum; GO:0016020//membrane	-	no KO assigned | (RefSeq) GHDC, D11LGP1, LGP1; GH3 domain containing	http://www.genome.jp/dbget-bin/www_bget?hsa:84514	0.542103	4.73588e-13	1.55386e-12	FALSE	-0.388872	1.55464e-06	3.64495e-06	FALSE	0.927309	1.04221e-30	6.3436e-30	FALSE
SDK1	292	0.944238	219	0.802163	238	0.801242	245	0.842242	234	0.74477	275	0.858838	604	2.08454	661	2.28536	734	2.33802	chr7	3341080	4308632	SDK1	221935	protein sidekick-1 isoform x1	GO:0007156//homophilic cell adhesion via plasma membrane adhesion molecules; GO:0007416//synapse assembly; GO:0010842//retina layer formation; GO:0048148//behavioral response to cocaine; GO:0060998//regulation of dendritic spine development	GO:0005886//plasma membrane; GO:0016021//integral component of membrane; GO:0030054//cell junction; GO:0045202//synapse; GO:0070062//extracellular exosome	GO:0042802//identical protein binding	K16353 protein sidekick | (RefSeq) SDK1; sidekick cell adhesion molecule 1	http://www.genome.jp/dbget-bin/www_bget?hsa:221935	-0.183315	0.127867	0.170742	FALSE	1.46024	3.57704e-49	3.21682e-48	UP	-1.64789	1.81212e-63	2.01803e-62	DOWN
SDK2	2	0.00407453	10	0.0230764	0	0	6	0.0129949	11	0.0220571	0	0	0	0	4	0.00871292	2	0.00401357	chr17	71330523	71640227	SDK2	54549	protein sidekick-2 isoform x1	GO:0007156//homophilic cell adhesion via plasma membrane adhesion molecules; GO:0007416//synapse assembly; GO:0010842//retina layer formation; GO:0060219//camera-type eye photoreceptor cell differentiation	GO:0005886//plasma membrane; GO:0016021//integral component of membrane; GO:0030054//cell junction; GO:0045202//synapse	-	K16353 protein sidekick | (RefSeq) SDK2; sidekick cell adhesion molecule 2	http://www.genome.jp/dbget-bin/www_bget?hsa:54549	0.277304	0.775025	0.817305	FALSE	-0.941459	0.314806	0.388073	FALSE	1.21898	0.17935	0.22894	FALSE
GRP	0	0	0	0	0	0	0	0	0	0	0	0	0	0	0	0	0	0	chr18	56887400	56898006	GRP	2922	gastrin-releasing peptide isoform x1	GO:0007218//neuropeptide signaling pathway; GO:0045668//negative regulation of osteoblast differentiation	GO:0005578//proteinaceous extracellular matrix; GO:0005615//extracellular space; GO:0016235//aggresome; GO:0048471//perinuclear region of cytoplasm	GO:0005184//neuropeptide hormone activity; GO:0030246//carbohydrate binding	K05224 gastrin-releasing peptide | (RefSeq) GRP, BN, GRP-10, preproGRP, proGRP; gastrin releasing pe	http://www.genome.jp/dbget-bin/www_bget?hsa:2922	-	-	-	-	-	-	-	-	-	-	-	-
TPRN	889	7.38082	677	6.36666	734	6.34435	1470	12.9746	1641	13.4097	1467	11.7629	521	4.61652	540	4.7935	597	4.88237	chr9	140086069	140095163	TPRN	286262	taperin	GO:0007605//sensory perception of sound	GO:0032420//stereocilium	GO:0019902//phosphatase binding	no KO assigned | (RefSeq) TPRN, C9orf75, DFNB79; taperin	http://www.genome.jp/dbget-bin/www_bget?hsa:286262	0.800995	3.56409e-26	1.86437e-25	FALSE	-0.426443	1.99151e-07	4.96967e-07	FALSE	1.2236	3.15472e-63	3.50859e-62	UP
THSD4	45	0.113375	61	0.174082	54	0.14164	10	0.0267841	30	0.0743933	40	0.0973296	35	0.0941124	44	0.118526	24	0.059562	chr15	71433788	72075722	THSD4	79875	thrombospondin type-1 domain-containing protein 4 isoform x1	GO:0006508//proteolysis; GO:0048251//elastic fiber assembly	GO:0001527//microfibril; GO:0005578//proteinaceous extracellular matrix; GO:0070062//extracellular exosome	GO:0004222//metalloendopeptidase activity	K23377 thrombospondin type-1 domain-containing protein 4 | (RefSeq) THSD4, ADAMTSL-6, ADAMTSL6, FVSY	http://www.genome.jp/dbget-bin/www_bget?hsa:79875	-1.2186	0.000859084	0.00156455	DOWN	-0.592042	0.0419181	0.0626133	FALSE	-0.634233	0.133761	0.177008	FALSE
SZRD1	6677	39.4828	5954	39.8801	6455	39.7385	5499	34.5687	5765	33.5532	6161	35.1851	9220	58.1878	9102	57.5466	10276	59.8555	chr1	16693525	16724643	SZRD1	26099	---	-	-	-	no KO assigned | (RefSeq) SZRD1, C1orf144; SUZ RNA binding domain containing 1	http://www.genome.jp/dbget-bin/www_bget?hsa:26099	-0.327958	3.06066e-19	1.28863e-18	FALSE	0.625373	2.80017e-83	4.29368e-82	FALSE	-0.957343	2.06079e-149	5.90574e-148	FALSE
HPCAL4	50	0.232874	71	0.374567	59	0.286082	18	0.0891242	39	0.178782	24	0.107955	39	0.193861	29	0.144412	62	0.284443	chr1	40144320	40157382	HPCAL4	51440	hippocalcin-like protein 4 isoform x2	GO:0007165//signal transduction; GO:0007417//central nervous system development	GO:0005622//intracellular	GO:0005246//calcium channel regulator activity; GO:0005509//calcium ion binding; GO:0008022//protein C-terminus binding; GO:0019904//protein domain specific binding	K23848 | (RefSeq) HPCAL4, HLP4; hippocalcin like 4	http://www.genome.jp/dbget-bin/www_bget?hsa:51440	-1.35874	6.59332e-06	1.43699e-05	DOWN	-0.446195	0.125665	0.171959	FALSE	-0.91682	0.00858634	0.0138139	FALSE
THSD1	18	0.120277	21	0.158946	23	0.160002	64	0.454633	101	0.66426	82	0.529179	10	0.0713153	13	0.0928769	6	0.0394924	chr13	52951302	52980629	THSD1	55901	thrombospondin type-1 domain-containing protein 1 isoform x2	-	GO:0005576//extracellular region; GO:0005737//cytoplasm; GO:0016021//integral component of membrane	-	no KO assigned | (RefSeq) THSD1, TMTSP, UNQ3010; thrombospondin type 1 domain containing 1	http://www.genome.jp/dbget-bin/www_bget?hsa:55901	1.7866	5.99235e-12	1.86931e-11	UP	-1.04241	0.0111797	0.018314	DOWN	2.8252	9.11548e-20	3.96591e-19	UP
CHST9	0	0	0	0	0	0	0	0	0	0	0	0	0	0	0	0	0	0	chr18	24495595	24765302	CHST9	83539	carbohydrate sulfotransferase 9 isoform x1	GO:0016051//carbohydrate biosynthetic process; GO:0030206//chondroitin sulfate biosynthetic process; GO:0042446//hormone biosynthetic process	GO:0000139//Golgi membrane; GO:0005576//extracellular region; GO:0016021//integral component of membrane	GO:0001537//N-acetylgalactosamine 4-O-sulfotransferase activity; GO:0047756//chondroitin 4-sulfotransferase activity	K09673 carbohydrate 4-sulfotransferase 9 [EC:2.8.2.-] | (RefSeq) CHST9, GALNAC4ST-2, GalNAc4ST2; car	http://www.genome.jp/dbget-bin/www_bget?hsa:83539	-	-	-	-	-	-	-	-	-	-	-	-
COL4A6	5	0.016446	1	0.00372572	5	0.0171218	3	0.0104902	8	0.0258993	4	0.0127066	0	0	7	0.0246175	5	0.0161999	chrX	107398837	107682727	COL4A6	1288	collagen alpha-6 chain isoform x2	GO:0007155//cell adhesion; GO:0030198//extracellular matrix organization; GO:0030574//collagen catabolic process; GO:0071230//cellular response to amino acid stimulus	GO:0005587//collagen type IV trimer; GO:0005788//endoplasmic reticulum lumen	GO:0005201//extracellular matrix structural constituent	K06237 collagen, type IV, alpha | (RefSeq) COL4A6, CXDELq22.3, DELXq22.3, DFNX6; collagen type IV al	http://www.genome.jp/dbget-bin/www_bget?hsa:1288	0.250781	0.873195	0.905249	FALSE	0.172537	1	1	FALSE	0.0746296	1	1	FALSE
COL4A5	18	0.0603414	4	0.0151888	10	0.0349004	21	0.0748401	10	0.0329952	10	0.032376	19	0.0679783	22	0.0788535	40	0.132086	chrX	107683074	107940775	COL4A5	1287	collagen alpha-5 chain isoform x1	GO:0007528//neuromuscular junction development; GO:0030198//extracellular matrix organization; GO:0030574//collagen catabolic process	GO:0005587//collagen type IV trimer; GO:0005605//basal lamina; GO:0005788//endoplasmic reticulum lumen; GO:0031594//neuromuscular junction	GO:0005201//extracellular matrix structural constituent	K06237 collagen, type IV, alpha | (RefSeq) COL4A5, ASLN, ATS, ATS1, CA54; collagen type IV alpha 5 c	http://www.genome.jp/dbget-bin/www_bget?hsa:1287	0.195389	0.767102	0.810155	FALSE	1.37919	0.00278242	0.00491518	UP	-1.19438	0.00565267	0.00930829	DOWN
COL4A4	366	0.773112	315	0.753689	341	0.749901	82	0.18414	93	0.193354	127	0.259087	126	0.284057	139	0.313929	139	0.289221	chr2	227867427	228029275	COL4A4	1286	collagen alpha-4 chain isoform x1	GO:0030574//collagen catabolic process; GO:0032836//glomerular basement membrane development	GO:0005587//collagen type IV trimer; GO:0005605//basal lamina; GO:0005788//endoplasmic reticulum lumen	GO:0005201//extracellular matrix structural constituent	K06237 collagen, type IV, alpha | (RefSeq) COL4A4, ATS2, BFH, CA44; collagen type IV alpha 4 chain	http://www.genome.jp/dbget-bin/www_bget?hsa:1286	-1.95593	3.59792e-47	3.12293e-46	DOWN	-1.29425	3.92654e-29	2.21519e-28	DOWN	-0.666788	7.40686e-05	0.000149332	FALSE
COL4A3	45	0.121398	38	0.116119	51	0.143238	18	0.0516231	8	0.0212421	11	0.0286598	3	0.00863764	16	0.0461504	11	0.0292311	chr2	228029281	228179508	COL4A3	1285	collagen alpha-3 chain isoform x1	GO:0006919//activation of cysteine-type endopeptidase activity involved in apoptotic process; GO:0007155//cell adhesion; GO:0007166//cell surface receptor signaling pathway; GO:0007605//sensory perception of sound; GO:0008015//blood circulation; GO:0008285//negative regulation of cell proliferation; GO:0010951//negative regulation of endopeptidase activity; GO:0016525//negative regulation of angi…	GO:0005587//collagen type IV trimer; GO:0005788//endoplasmic reticulum lumen	GO:0005178//integrin binding; GO:0005201//extracellular matrix structural constituent; GO:0008191//metalloendopeptidase inhibitor activity	K06237 collagen, type IV, alpha | (RefSeq) COL4A3, ATS2, ATS3; collagen type IV alpha 3 chain	http://www.genome.jp/dbget-bin/www_bget?hsa:1285	-2.03485	1.79195e-10	5.19705e-10	DOWN	-2.10106	1.228e-08	3.29999e-08	DOWN	0.0713452	1	1	FALSE
COL4A2	2143	7.24289	1906	7.2968	2171	7.63902	3186	11.4474	3111	10.349	3417	11.1536	6549	23.6232	6889	24.8944	7735	25.7515	chr13	110959614	111165556	COL4A2	1284	collagen alpha-2 chain	GO:0006351//transcription, DNA-templated; GO:0016525//negative regulation of angiogenesis; GO:0030198//extracellular matrix organization; GO:0030574//collagen catabolic process; GO:0035987//endodermal cell differentiation; GO:0071560//cellular response to transforming growth factor beta stimulus	GO:0005587//collagen type IV trimer; GO:0005788//endoplasmic reticulum lumen; GO:0070062//extracellular exosome	GO:0005201//extracellular matrix structural constituent; GO:0005515//protein binding	K06237 collagen, type IV, alpha | (RefSeq) COL4A2, BSVD2, ICH, POREN2; collagen type IV alpha 2 chai	http://www.genome.jp/dbget-bin/www_bget?hsa:1284	0.448004	2.16178e-18	8.82501e-18	FALSE	1.80893	0	0	UP	-1.36491	5.51754e-176	1.92142e-174	DOWN
COL4A1	1152	5.51838	1053	5.71357	1098	5.47582	2045	10.4142	1924	9.07135	2218	10.2613	4407	22.5308	4342	22.2384	4805	22.6728	chr13	110801305	110959504	COL4A1	1282	collagen alpha-1 chain	GO:0001569//patterning of blood vessels; GO:0007420//brain development; GO:0007528//neuromuscular junction development; GO:0030574//collagen catabolic process; GO:0030855//epithelial cell differentiation; GO:0061304//retinal blood vessel morphogenesis; GO:0061333//renal tubule morphogenesis; GO:0071230//cellular response to amino acid stimulus; GO:0071711//basement membrane organization	GO:0005587//collagen type IV trimer; GO:0005788//endoplasmic reticulum lumen	GO:0030023//extracellular matrix constituent conferring elasticity; GO:0048407//platelet-derived growth factor binding	K06237 collagen, type IV, alpha | (RefSeq) COL4A1, BSVD, BSVD1, PADMAL, RATOR; collagen type IV alph	http://www.genome.jp/dbget-bin/www_bget?hsa:1282	0.709376	7.36869e-29	4.14691e-28	FALSE	2.07904	0	0	UP	-1.37335	6.29209e-160	1.96198e-158	DOWN
OR8J3	0	0	0	0	0	0	0	0	0	0	0	0	0	0	0	0	0	0	chr11	55904247	55905194	OR8J3	81168	olfactory receptor 8j3	GO:0007186//G-protein coupled receptor signaling pathway; GO:0050911//detection of chemical stimulus involved in sensory perception of smell	GO:0005886//plasma membrane; GO:0016021//integral component of membrane	GO:0004930//G-protein coupled receptor activity; GO:0004984//olfactory receptor activity; GO:0005549//odorant binding	K04257 olfactory receptor | (RefSeq) OR8J3, OR11-173; olfactory receptor family 8 subfamily J member	http://www.genome.jp/dbget-bin/www_bget?hsa:81168	-	-	-	-	-	-	-	-	-	-	-	-
GRN	17799	165.726	15032	158.538	16358	158.568	27334	270.565	28676	262.798	28155	253.181	15370	152.737	15532	154.625	17713	162.458	chr17	42422454	42430474	GRN	2896	granulins	GO:0007165//signal transduction; GO:0032355//response to estradiol; GO:0035988//chondrocyte proliferation; GO:0048488//synaptic vesicle endocytosis; GO:0060179//male mating behavior; GO:0060999//positive regulation of dendritic spine development; GO:0061351//neural precursor cell proliferation	GO:0005615//extracellular space; GO:0005829//cytosol; GO:0043231//intracellular membrane-bounded organelle; GO:0070062//extracellular exosome	GO:0005125//cytokine activity; GO:0008083//growth factor activity; GO:0044822//poly(A) RNA binding	no KO assigned | (RefSeq) GRN, CLN11, GEP, GP88, PCDGF, PEPI, PGRN; granulin precursor	http://www.genome.jp/dbget-bin/www_bget?hsa:2896	0.58116	1.73362e-56	1.77314e-55	FALSE	0.0259022	0.449378	0.530724	FALSE	0.551329	8.75877e-46	7.50234e-45	FALSE
CHST3	501	1.56943	473	1.67836	465	1.51651	451	1.50194	469	1.44606	461	1.39471	507	1.69506	456	1.5273	527	1.62618	chr10	73724120	73773322	CHST3	9469	carbohydrate sulfotransferase 3	GO:0002230//positive regulation of defense response to virus by host; GO:0005975//carbohydrate metabolic process; GO:0014012//peripheral nervous system axon regeneration; GO:0030206//chondroitin sulfate biosynthetic process; GO:0051272//positive regulation of cellular component movement; GO:0098779//mitophagy in response to mitochondrial depolarization; GO:0098792//xenophagy	GO:0000139//Golgi membrane; GO:0016021//integral component of membrane	GO:0001517//N-acetylglucosamine 6-O-sulfotransferase activity; GO:0008459//chondroitin 6-sulfotransferase activity; GO:0050698//proteoglycan sulfotransferase activity	K01020 chondroitin 6-sulfotransferase 3 [EC:2.8.2.17] | (RefSeq) CHST3, C6ST, C6ST1, HSD; carbohydra	http://www.genome.jp/dbget-bin/www_bget?hsa:9469	-0.256053	0.00298402	0.00512546	FALSE	0.0914529	0.302949	0.375012	FALSE	-0.35156	5.98379e-05	0.000121666	FALSE
CHST2	3749	19.7949	3031	18.1278	3023	16.6175	1581	8.87447	1612	8.37744	1562	7.96525	2442	13.7613	2295	12.9562	2612	13.5852	chr3	142838618	142842856	CHST2	9435	carbohydrate sulfotransferase 2	GO:0005975//carbohydrate metabolic process; GO:0006044//N-acetylglucosamine metabolic process; GO:0006954//inflammatory response; GO:0007275//multicellular organismal development; GO:0018146//keratan sulfate biosynthetic process	GO:0005802//trans-Golgi network; GO:0016021//integral component of membrane; GO:0031228//intrinsic component of Golgi membrane	GO:0001517//N-acetylglucosamine 6-O-sulfotransferase activity	K04745 carbohydrate 6-sulfotransferase 2 [EC:2.8.2.-] | (RefSeq) CHST2, C6ST, GST-2, GST2, Gn6ST-1,	http://www.genome.jp/dbget-bin/www_bget?hsa:9435	-1.23619	2.97525e-80	4.32408e-79	DOWN	-0.371159	5.11491e-11	1.56207e-10	FALSE	-0.869127	5.71376e-56	5.82831e-55	FALSE
CHST5	8	0.0537688	4	0.0304523	7	0.0489809	4	0.0285807	10	0.0661528	2	0.0129823	0	0	6	0.0431169	5	0.0331027	chr16	75562428	75569068	CHST5	23563	carbohydrate sulfotransferase 5	GO:0005975//carbohydrate metabolic process; GO:0006044//N-acetylglucosamine metabolic process; GO:0006477//protein sulfation; GO:0018146//keratan sulfate biosynthetic process	GO:0016021//integral component of membrane; GO:0031228//intrinsic component of Golgi membrane	GO:0001517//N-acetylglucosamine 6-O-sulfotransferase activity	K09670 carbohydrate 6-sulfotransferase 5 [EC:2.8.2.-] | (RefSeq) CHST5, I-GlcNAc-6-ST, I-GlcNAc6ST,	http://www.genome.jp/dbget-bin/www_bget?hsa:23563	-0.427782	0.597929	0.653814	FALSE	-0.721738	0.315545	0.388811	FALSE	0.292906	0.767009	0.810657	FALSE
GCLM	9473	41.2364	7874	38.8248	9258	41.9564	6994	32.3661	8254	35.3643	8692	36.5421	2868	13.3244	2847	13.2506	3023	12.9624	chr1	94350755	94375154	GCLM	2730	glutamate--cysteine ligase regulatory subunit	GO:0006534//cysteine metabolic process; GO:0006536//glutamate metabolic process; GO:0006750//glutathione biosynthetic process; GO:0006979//response to oxidative stress; GO:0008637//apoptotic mitochondrial changes; GO:0035229//positive regulation of glutamate-cysteine ligase activity; GO:0042493//response to drug; GO:0043524//negative regulation of neuron apoptotic process; GO:0050880//regulation …	GO:0005829//cytosol; GO:0017109//glutamate-cysteine ligase complex	GO:0004357//glutamate-cysteine ligase activity; GO:0030234//enzyme regulator activity; GO:0035226//glutamate-cysteine ligase catalytic subunit binding; GO:0046982//protein heterodimerization activity	K11205 glutamate--cysteine ligase regulatory subunit | (RefSeq) GCLM, GLCLR; glutamate-cysteine liga	http://www.genome.jp/dbget-bin/www_bget?hsa:2730	-0.349215	3.80451e-13	1.25362e-12	FALSE	-1.56086	0	0	DOWN	1.20744	7.46977e-136	1.86131e-134	UP
CHST7	1650	14.5683	1571	15.7116	1588	14.597	1716	16.107	1710	14.8603	1607	13.7031	3532	33.2827	3846	36.3069	3991	34.7104	chrX	46433122	46457931	CHST7	56548	carbohydrate sulfotransferase 7	GO:0005976//polysaccharide metabolic process; GO:0006044//N-acetylglucosamine metabolic process; GO:0030206//chondroitin sulfate biosynthetic process	GO:0000139//Golgi membrane; GO:0016021//integral component of membrane	GO:0001517//N-acetylglucosamine 6-O-sulfotransferase activity; GO:0008459//chondroitin 6-sulfotransferase activity	K04743 chondroitin 6-sulfotransferase 7 [EC:2.8.2.17] | (RefSeq) CHST7, C6ST-2, GST-5; carbohydrate	http://www.genome.jp/dbget-bin/www_bget?hsa:56548	-0.129753	0.0486844	0.0699502	FALSE	1.28256	8.34381e-147	2.48774e-145	UP	-1.4161	3.88748e-126	8.78508e-125	DOWN
CHST6	727	2.3065	689	2.47605	686	2.26586	84	0.283316	118	0.368476	142	0.435099	61	0.206549	74	0.251019	67	0.209386	chr16	75507022	75528926	CHST6	4166	carbohydrate sulfotransferase 6	GO:0005975//carbohydrate metabolic process; GO:0006044//N-acetylglucosamine metabolic process; GO:0018146//keratan sulfate biosynthetic process	GO:0000139//Golgi membrane; GO:0016021//integral component of membrane	GO:0001517//N-acetylglucosamine 6-O-sulfotransferase activity	K09671 carbohydrate 6-sulfotransferase 6 [EC:2.8.2.-] | (RefSeq) CHST6, C-GlcNAc6ST, GST4-beta, MCDC	http://www.genome.jp/dbget-bin/www_bget?hsa:4166	-2.81209	4.01386e-117	9.176e-116	DOWN	-3.33539	1.98709e-166	6.78833e-165	DOWN	0.516103	0.012045	0.0190181	FALSE
ITGAX	91633	453.054	83047	465.096	85950	442.417	50533	265.611	52025	253.173	53302	254.52	43487	229.473	45352	239.745	48249	234.985	chr16	31366455	31394318	ITGAX	3687	integrin alpha-x isoform x1	GO:0007229//integrin-mediated signaling pathway; GO:0009887//organ morphogenesis; GO:0030198//extracellular matrix organization; GO:0034113//heterotypic cell-cell adhesion; GO:0050900//leukocyte migration; GO:0051607//defense response to virus; GO:1903955//positive regulation of protein targeting to mitochondrion	GO:0008305//integrin complex; GO:0009897//external side of plasma membrane	GO:0004872//receptor activity; GO:0005515//protein binding; GO:0046872//metal ion binding	K06462 integrin alpha X | (RefSeq) ITGAX, CD11C, SLEB6; integrin subunit alpha X	http://www.genome.jp/dbget-bin/www_bget?hsa:3687	-0.937992	1.27273e-153	4.18886e-152	FALSE	-0.88505	1.29475e-155	4.13451e-154	FALSE	-0.0570092	0.100724	0.136131	FALSE
MLNR	22	0.38786	16	0.319516	22	0.403797	24	0.449817	34	0.589983	30	0.510804	33	0.620927	22	0.414697	38	0.659917	chr13	49794474	49796513	MLNR	2862	motilin receptor	GO:0007186//G-protein coupled receptor signaling pathway; GO:0007586//digestion	GO:0005887//integral component of plasma membrane	GO:0016520//growth hormone-releasing hormone receptor activity	K05266 motilin receptor | (RefSeq) MLNR, GPR38, MTLR1; motilin receptor	http://www.genome.jp/dbget-bin/www_bget?hsa:2862	0.354911	0.249007	0.309921	FALSE	0.671212	0.0330763	0.0505364	FALSE	-0.320441	0.256143	0.315518	FALSE
HLX	5268	50.4923	4174	45.3161	4656	46.4602	7153	72.8853	7490	70.6593	7484	69.2777	7381	75.5038	6866	70.3621	8050	76.0026	chr1	221052743	221058401	HLX	3142	#NAME?	GO:0001889//liver development; GO:0006355//regulation of transcription, DNA-templated; GO:0007519//skeletal muscle tissue development; GO:0008284//positive regulation of cell proliferation; GO:0045627//positive regulation of T-helper 1 cell differentiation; GO:0045629//negative regulation of T-helper 2 cell differentiation; GO:0046622//positive regulation of organ growth; GO:0048484//enteric nerv…	GO:0005634//nucleus	GO:0005515//protein binding; GO:0043565//sequence-specific DNA binding	K09339 homeobox protein HLX1 | (RefSeq) HLX, HB24, HLX1; H2.0 like homeobox	http://www.genome.jp/dbget-bin/www_bget?hsa:3142	0.457851	2.46197e-25	1.2511e-24	FALSE	0.706185	1.9621e-58	2.07128e-57	FALSE	-0.252226	1.89699e-09	5.26755e-09	FALSE
RAMP3	0	0	0	0	0	0	0	0	4	0.063892	2	0.0313465	0	0	0	0	0	0	chr7	45197367	45223849	RAMP3	10268	receptor activity-modifying protein 3 isoform x2	GO:0001921//positive regulation of receptor recycling; GO:0006816//calcium ion transport; GO:0006886//intracellular protein transport; GO:0008277//regulation of G-protein coupled receptor protein signaling pathway; GO:0031623//receptor internalization; GO:0045892//negative regulation of transcription, DNA-templated; GO:0071392//cellular response to estradiol stimulus; GO:0086103//G-protein couple…	GO:0005764//lysosome; GO:0005887//integral component of plasma membrane; GO:0009986//cell surface; GO:0043235//receptor complex	GO:0005515//protein binding; GO:0008565//protein transporter activity; GO:0015026//coreceptor activity	K08449 receptor activity modifying protein 3 | (RefSeq) RAMP3; receptor activity modifying protein 3	http://www.genome.jp/dbget-bin/www_bget?hsa:10268	3.99164	0.0424372	0.0615387	FALSE	-	-	-	-	3.97073	0.0432495	0.0624985	FALSE
HLCS	1484	5.09603	1422	5.53119	1440	5.14813	797	2.90957	914	3.08925	917	3.04122	718	2.63146	883	3.24201	851	2.8786	chr21	38123189	38362545	HLCS	3141	biotin--protein ligase isoform x2	GO:0006768//biotin metabolic process; GO:0008283//cell proliferation; GO:0070781//response to biotin; GO:0071110//histone biotinylation	GO:0000785//chromatin; GO:0005652//nuclear lamina; GO:0005739//mitochondrion; GO:0005829//cytosol; GO:0016363//nuclear matrix	GO:0004077//biotin-[acetyl-CoA-carboxylase] ligase activity; GO:0004078//biotin-[methylcrotonoyl-CoA-carboxylase] ligase activity; GO:0004079//biotin-[methylmalonyl-CoA-carboxytransferase] ligase activity; GO:0004080//biotin-[propionyl-CoA-carboxylase (ATP-hydrolyzing)] ligase activity; GO:0005524//ATP binding; GO:0009374//biotin binding; GO:0019899//enzyme binding; GO:0042803//protein homodimeri…	K01942 biotin---protein ligase [EC:6.3.4.9 6.3.4.10 6.3.4.11 6.3.4.15] | (RefSeq) HLCS, HCS; holocar	http://www.genome.jp/dbget-bin/www_bget?hsa:3141	-0.92474	9.52227e-49	8.48726e-48	FALSE	-0.784499	1.23087e-24	6.16992e-24	FALSE	-0.144854	0.0828065	0.113604	FALSE
NOG	8	0.0923619	4	0.0523098	4	0.0480785	26	0.319116	29	0.32954	14	0.156103	6	0.0739312	8	0.0987526	6	0.068235	chr17	54671060	54672951	NOG	9241	noggin	GO:0000122//negative regulation of transcription from RNA polymerase II promoter; GO:0001701//in utero embryonic development; GO:0001706//endoderm formation; GO:0001707//mesoderm formation; GO:0001839//neural plate morphogenesis; GO:0001843//neural tube closure; GO:0003149//membranous septum morphogenesis; GO:0003151//outflow tract morphogenesis; GO:0003223//ventricular compact myocardium morphog…	GO:0005615//extracellular space; GO:0043234//protein complex	GO:0019955//cytokine binding; GO:0032403//protein complex binding; GO:0042803//protein homodimerization activity	K04658 noggin | (RefSeq) NOG, SYM1, SYNS1, SYNS1A; noggin	http://www.genome.jp/dbget-bin/www_bget?hsa:9241	1.90039	6.88109e-05	0.000139427	UP	0.363322	0.664013	0.726167	FALSE	1.53189	0.000778083	0.00141344	UP
ITGAV	10675	33.7844	9410	33.7333	10069	33.176	8778	29.5336	10109	31.4894	10965	33.5149	26877	90.7828	25667	86.852	27788	86.6282	chr2	187454790	187545629	ITGAV	3685	integrin alpha-v isoform x1	GO:0001525//angiogenesis; GO:0002479//antigen processing and presentation of exogenous peptide antigen via MHC class I, TAP-dependent; GO:0007160//cell-matrix adhesion; GO:0007229//integrin-mediated signaling pathway; GO:0010745//negative regulation of macrophage derived foam cell differentiation; GO:0010888//negative regulation of lipid storage; GO:0016049//cell growth; GO:0030198//extracellular…	GO:0005925//focal adhesion; GO:0009897//external side of plasma membrane; GO:0031258//lamellipodium membrane; GO:0031527//filopodium membrane; GO:0031528//microvillus membrane; GO:0032587//ruffle membrane; GO:0034683//integrin alphav-beta3 complex; GO:0034684//integrin alphav-beta5 complex; GO:0034686//integrin alphav-beta8 complex; GO:0035867//alphav-beta3 integrin-IGF-1-IGF1R complex; GO:004533…	GO:0001618//virus receptor activity; GO:0001846//opsonin binding; GO:0001968//fibronectin binding; GO:0002020//protease binding; GO:0005080//protein kinase C binding; GO:0005245//voltage-gated calcium channel activity; GO:0015026//coreceptor activity; GO:0017134//fibroblast growth factor binding; GO:0019960//C-X3-C chemokine binding; GO:0031994//insulin-like growth factor I binding; GO:0038132//n…	K06487 integrin alpha V | (RefSeq) ITGAV, CD51, MSK8, VNRA, VTNR; integrin subunit alpha V	http://www.genome.jp/dbget-bin/www_bget?hsa:3685	-0.213508	2.08915e-06	4.72425e-06	FALSE	1.45714	0	0	UP	-1.67475	3.23583e-293	2.37024e-291	DOWN
HIBCH	738	8.38739	601	7.73687	636	7.52516	375	4.53079	370	4.13885	400	4.39047	493	5.97987	472	5.73546	499	5.5863	chr2	191069360	191184771	HIBCH	26275	3-hydroxyisobutyryl- mitochondrial isoform x2	GO:0006574//valine catabolic process	GO:0005759//mitochondrial matrix; GO:0070062//extracellular exosome	GO:0003860//3-hydroxyisobutyryl-CoA hydrolase activity	K05605 3-hydroxyisobutyryl-CoA hydrolase [EC:3.1.2.4] | (RefSeq) HIBCH, HIBYLCOAH; 3-hydroxyisobutyr	http://www.genome.jp/dbget-bin/www_bget?hsa:26275	-0.980249	8.93988e-30	5.15988e-29	FALSE	-0.386552	1.41039e-06	3.32033e-06	FALSE	-0.597737	1.77333e-11	5.48224e-11	FALSE
CAMK1	5570	81.5474	4545	75.3718	5166	78.7404	6263	97.4787	6248	90.0334	6076	85.9118	3147	49.1729	3334	52.1887	3603	51.9604	chr3	9799029	9811668	CAMK1	8536	calcium calmodulin-dependent protein kinase type 1 isoform x2	GO:0007049//cell cycle; GO:0018107//peptidyl-threonine phosphorylation; GO:0032091//negative regulation of protein binding; GO:0033138//positive regulation of peptidyl-serine phosphorylation; GO:0035556//intracellular signal transduction; GO:0045944//positive regulation of transcription from RNA polymerase II promoter; GO:0046827//positive regulation of protein export from nucleus; GO:0051149//po…	GO:0005634//nucleus; GO:0005737//cytoplasm	GO:0004683//calmodulin-dependent protein kinase activity; GO:0005516//calmodulin binding; GO:0005524//ATP binding	K08794 calcium/calmodulin-dependent protein kinase I [EC:2.7.11.17] | (RefSeq) CAMK1, CAMKI; calcium	http://www.genome.jp/dbget-bin/www_bget?hsa:8536	0.0911725	0.0588995	0.0835698	FALSE	-0.554951	3.86704e-43	3.05488e-42	FALSE	0.642177	6.48512e-37	4.54092e-36	FALSE
ITGAL	2542	10.9239	1961	9.54556	2346	10.4959	1779	8.1274	1999	8.45521	2071	8.59536	2466	11.3102	2387	10.9676	2845	12.0431	chr16	30483983	30534506	ITGAL	3683	integrin alpha-l	GO:0002291//T cell activation via T cell receptor contact with antigen bound to MHC molecule on antigen presenting cell; GO:0006954//inflammatory response; GO:0007157//heterophilic cell-cell adhesion via plasma membrane cell adhesion molecules; GO:0007160//cell-matrix adhesion; GO:0007229//integrin-mediated signaling pathway; GO:0030198//extracellular matrix organization; GO:0043113//receptor clu…	GO:0009986//cell surface; GO:0034687//integrin alphaL-beta2 complex; GO:0070062//extracellular exosome	GO:0030369//ICAM-3 receptor activity; GO:0032403//protein complex binding; GO:0046872//metal ion binding; GO:0046982//protein heterodimerization activity; GO:0050839//cell adhesion molecule binding	K05718 integrin alpha L | (RefSeq) ITGAL, CD11A, LFA-1, LFA1A; integrin subunit alpha L	http://www.genome.jp/dbget-bin/www_bget?hsa:3683	-0.421455	1.48201e-13	4.96359e-13	FALSE	0.213486	9.29842e-05	0.000189604	FALSE	-0.638894	7.06102e-34	4.63659e-33	FALSE
ITGAM	49316	227.074	44717	233.223	48247	231.28	10475	51.275	10929	49.5299	11333	50.3969	23291	114.457	24749	121.841	26555	120.442	chr16	31271288	31344213	ITGAM	3684	integrin alpha-m isoform x1	GO:0007155//cell adhesion; GO:0007229//integrin-mediated signaling pathway; GO:0010668//ectodermal cell differentiation; GO:0030198//extracellular matrix organization; GO:0034142//toll-like receptor 4 signaling pathway; GO:0050900//leukocyte migration	GO:0005615//extracellular space; GO:0008305//integrin complex; GO:0009986//cell surface; GO:0070062//extracellular exosome	GO:0001948//glycoprotein binding; GO:0046872//metal ion binding	K06461 integrin alpha M | (RefSeq) ITGAM, CD11B, CR3A, MAC-1, MAC1A, MO1A, SLEB6; integrin subunit a	http://www.genome.jp/dbget-bin/www_bget?hsa:3684	-2.3163	0	0	DOWN	-0.88989	3.23484e-149	9.80291e-148	FALSE	-1.4305	2.04543177378276e-321	1.65521872669734e-319	DOWN
MAP3K21	246	0.925034	242	1.03076	187	0.732069	415	1.65899	525	1.94308	509	1.8485	138	0.553829	169	0.679461	158	0.585238	chr1	233463514	233520894	MAP3K21	84451	mitogen-activated protein kinase kinase kinase mlk4	GO:0000186//activation of MAPKK activity; GO:0007257//activation of JUN kinase activity; GO:0046777//protein autophosphorylation	GO:0005622//intracellular	GO:0004709//MAP kinase kinase kinase activity; GO:0005524//ATP binding; GO:0042803//protein homodimerization activity	K17534 mitogen-activated protein kinase kinase kinase MLK4 [EC:2.7.11.25] | (RefSeq) MAP3K21, MLK4,	http://www.genome.jp/dbget-bin/www_bget?hsa:84451	0.899425	2.51048e-12	7.95462e-12	FALSE	-0.497303	0.00168995	0.00305905	FALSE	1.39261	2.21835e-31	1.37385e-30	UP
HLF	0	0	2	0.00919455	0	0	6	0.0258883	8	0.0319579	1	0.00391977	4	0.0173266	0	0	0	0	chr17	53342321	53402537	HLF	3131	hepatic leukemia factor isoform x1	GO:0006355//regulation of transcription, DNA-templated; GO:0006366//transcription from RNA polymerase II promoter; GO:0035914//skeletal muscle cell differentiation; GO:0048511//rhythmic process	GO:0005634//nucleus	GO:0000977//RNA polymerase II regulatory region sequence-specific DNA binding; GO:0001077//transcriptional activator activity, RNA polymerase II core promoter proximal region sequence-specific binding; GO:0003690//double-stranded DNA binding; GO:0003700//transcription factor activity, sequence-specific DNA binding; GO:0043565//sequence-specific DNA binding	K09057 hepatic leukemia factor | (RefSeq) HLF; HLF transcription factor, PAR bZIP family member	http://www.genome.jp/dbget-bin/www_bget?hsa:3131	2.51447	0.0132681	0.0209498	UP	0.916305	0.705493	0.761815	FALSE	1.58473	0.0710555	0.0989443	FALSE
NOV	92	0.77263	47	0.447097	57	0.498364	221	1.97309	214	1.76891	223	1.80871	72	0.645342	82	0.736297	80	0.6618	chr8	120428552	120436678	NOV	4856	protein nov homolog	GO:0001525//angiogenesis; GO:0002062//chondrocyte differentiation; GO:0010468//regulation of gene expression; GO:0010761//fibroblast migration; GO:0010832//negative regulation of myotube differentiation; GO:0014910//regulation of smooth muscle cell migration; GO:0021785//branchiomotor neuron axon guidance; GO:0030308//negative regulation of cell growth; GO:0033627//cell adhesion mediated by integ…	GO:0002116//semaphorin receptor complex; GO:0005578//proteinaceous extracellular matrix; GO:0005634//nucleus; GO:0005737//cytoplasm; GO:0005887//integral component of plasma membrane; GO:0005921//gap junction; GO:0030424//axon; GO:0030425//dendrite; GO:0043025//neuronal cell body; GO:0070062//extracellular exosome	GO:0005112//Notch binding; GO:0005178//integrin binding; GO:0005520//insulin-like growth factor binding; GO:0008083//growth factor activity; GO:0008201//heparin binding; GO:0017154//semaphorin receptor activity	K23571 insulin-like growth factor-binding protein 9 | (RefSeq) CCN3, IBP-9, IGFBP-9, IGFBP9, NOV, NO	http://www.genome.jp/dbget-bin/www_bget?hsa:4856	1.5593	1.66449e-17	6.55604e-17	UP	0.309424	0.178423	0.234103	FALSE	1.24811	4.88118e-18	2.00364e-17	UP
GPSM1	2304	19.8609	1866	18.22	1994	17.895	2752	25.2196	2880	24.4353	2819	23.4689	1450	13.3401	1634	15.06	1853	15.7342	chr9	139221932	139254057	GPSM1	26086	g-protein-signaling modulator 1 isoform x3	GO:0007399//nervous system development; GO:0008277//regulation of G-protein coupled receptor protein signaling pathway; GO:0030154//cell differentiation; GO:0050790//regulation of catalytic activity	GO:0000139//Golgi membrane; GO:0005789//endoplasmic reticulum membrane; GO:0005829//cytosol; GO:0005886//plasma membrane	GO:0001965//G-protein alpha-subunit binding; GO:0005092//GDP-dissociation inhibitor activity	K15839 G-protein signaling modulator 1 | (RefSeq) GPSM1, AGS3; G protein signaling modulator 1	http://www.genome.jp/dbget-bin/www_bget?hsa:26086	0.2621	7.6352e-07	1.78035e-06	FALSE	-0.277228	1.53003e-05	3.33139e-05	FALSE	0.535647	9.76283e-18	3.96344e-17	FALSE
ITGAD	140	0.781324	121	0.764907	98	0.5694	555	3.29282	519	2.85088	542	2.92134	34	0.202514	40	0.238681	62	0.340838	chr16	31404633	31437826	ITGAD	3681	integrin alpha-d isoform x1	GO:0006955//immune response; GO:0007229//integrin-mediated signaling pathway; GO:0030198//extracellular matrix organization; GO:0034113//heterotypic cell-cell adhesion	GO:0008305//integrin complex; GO:0009986//cell surface	GO:0046872//metal ion binding	K06594 integrin alpha D | (RefSeq) ITGAD, ADB2, CD11D; integrin subunit alpha D	http://www.genome.jp/dbget-bin/www_bget?hsa:3681	1.9754	2.59205e-53	2.51143e-52	UP	-1.36174	2.01136e-09	5.66306e-09	DOWN	3.33019	1.69435e-104	3.19576e-103	UP
FAM134B	248	1.68132	196	1.50513	234	1.65159	190	1.36938	266	1.77496	335	2.19343	63	0.45584	59	0.427667	90	0.601027	chr5	16473147	16617167	FAM134B	54463	protein fam134b isoform x2	GO:0019233//sensory perception of pain; GO:0043524//negative regulation of neuron apoptotic process; GO:0061709//reticulophagy	GO:0005794//Golgi apparatus; GO:0005801//cis-Golgi network; GO:0030176//integral component of endoplasmic reticulum membrane	GO:0003676//nucleic acid binding; GO:0005515//protein binding; GO:0008270//zinc ion binding	no KO assigned | (RefSeq) RETREG1, FAM134B, JK-1, JK1; reticulophagy regulator 1	http://www.genome.jp/dbget-bin/www_bget?hsa:54463	0.0208219	0.901572	0.930334	FALSE	-1.63334	9.11606e-25	4.59309e-24	DOWN	1.65094	6.07558e-16	2.29798e-15	UP
FAM134A	3817	18.5282	3549	19.5136	3851	19.4614	4731	24.4139	4918	23.4967	4881	22.8823	3140	16.2673	3233	16.7793	3426	16.3814	chr2	220042912	220050197	FAM134A	79137	protein fam134a	-	GO:0016021//integral component of membrane	-	no KO assigned | (RefSeq) RETREG2, C2orf17, FAM134A, MAG-2; reticulophagy regulator family member 2	http://www.genome.jp/dbget-bin/www_bget?hsa:79137	0.177159	2.66854e-05	5.58156e-05	FALSE	-0.152929	0.000120342	0.00024345	FALSE	0.326074	8.39495e-15	3.02062e-14	FALSE
LOC100287896	70	0.618048	57	0.570058	80	0.735364	50	0.469317	65	0.564866	59	0.503102	17	0.160194	21	0.198244	22	0.191337	chr11	74204430	74209578	LOC100287896	100287896	tigger transposable element-derived protein 2-like	GO:0009107//lipoate biosynthetic process; GO:0009249//protein lipoylation; GO:0046487//glyoxylate metabolic process	GO:0005759//mitochondrial matrix; GO:0016020//membrane	GO:0003677//DNA binding; GO:0016415//octanoyltransferase activity; GO:0016874//ligase activity; GO:0033819//lipoyl(octanoyl) transferase activity	no KO assigned | (RefSeq) uncharacterized LOC100287896	http://www.genome.jp/dbget-bin/www_bget?hsa:100287896	-0.445224	0.0296387	0.0442931	FALSE	-1.73568	5.20119e-12	1.66216e-11	DOWN	1.28702	3.27175e-07	7.93041e-07	UP
SMAD9	51	0.201196	37	0.165337	43	0.176606	19	0.0796847	18	0.0698924	38	0.144781	14	0.0589456	13	0.0548338	13	0.050518	chr13	37418968	37494409	SMAD9	4093	mothers against decapentaplegic homolog 9 isoform x2	GO:0001657//ureteric bud development; GO:0006468//protein phosphorylation; GO:0007179//transforming growth factor beta receptor signaling pathway; GO:0030509//BMP signaling pathway; GO:0030901//midbrain development; GO:0030902//hindbrain development; GO:0051216//cartilage development; GO:0060348//bone development; GO:0060395//SMAD protein signal transduction; GO:0071407//cellular response to orga…	GO:0005654//nucleoplasm; GO:0005667//transcription factor complex; GO:0005829//cytosol; GO:0071141//SMAD protein complex	GO:0003677//DNA binding; GO:0003700//transcription factor activity, sequence-specific DNA binding; GO:0005515//protein binding; GO:0030618//transforming growth factor beta receptor, pathway-specific cytoplasmic mediator activity; GO:0046872//metal ion binding	K16791 mothers against decapentaplegic homolog 9 | (RefSeq) SMAD9, MADH6, MADH9, PPH2, SMAD8, SMAD8/	http://www.genome.jp/dbget-bin/www_bget?hsa:4093	-0.998491	0.000807298	0.0014739	FALSE	-1.65582	2.40506e-08	6.33617e-08	DOWN	0.651291	0.103997	0.14012	FALSE
TRERF1	11488	32.9576	9534	30.9818	10867	32.457	5338	16.2803	5597	15.8043	5705	15.8069	5535	16.9474	5302	16.2632	6236	17.6226	chr6	42192671	42419789	TRERF1	55809	transcriptional-regulating factor 1 isoform x1	GO:0006357//regulation of transcription from RNA polymerase II promoter; GO:0006694//steroid biosynthetic process; GO:0006707//cholesterol catabolic process; GO:0007275//multicellular organismal development; GO:0042592//homeostatic process; GO:0045893//positive regulation of transcription, DNA-templated; GO:0046885//regulation of hormone biosynthetic process	GO:0000118//histone deacetylase complex; GO:0005667//transcription factor complex	GO:0001104//RNA polymerase II transcription cofactor activity; GO:0003700//transcription factor activity, sequence-specific DNA binding; GO:0008134//transcription factor binding; GO:0008301//DNA binding, bending; GO:0030374//ligand-dependent nuclear receptor transcription coactivator activity; GO:0044212//transcription regulatory region DNA binding; GO:0046872//metal ion binding	no KO assigned | (RefSeq) TRERF1, BCAR2, HSA277276, RAPA, TREP132, TReP-132, dJ139D8.5; transcriptio	http://www.genome.jp/dbget-bin/www_bget?hsa:55809	-1.13219	2.3367e-200	1.10111e-198	DOWN	-0.857805	1.1876e-114	2.59292e-113	FALSE	-0.278291	2.01372e-11	6.21411e-11	FALSE
EEF2K	1456	4.29091	1326	4.42641	1371	4.20643	978	3.06407	1104	3.20232	1251	3.56062	560	1.76137	670	2.11115	710	2.0611	chr16	22217592	22300066	EEF2K	29904	eukaryotic elongation factor 2 kinase	GO:0002931//response to ischemia; GO:0006414//translational elongation; GO:0031952//regulation of protein autophosphorylation; GO:0032869//cellular response to insulin stimulus; GO:0043066//negative regulation of apoptotic process; GO:0045807//positive regulation of endocytosis; GO:0051965//positive regulation of synapse assembly; GO:0061003//positive regulation of dendritic spine morphogenesis; …	GO:0005829//cytosol; GO:0014069//postsynaptic density	GO:0003746//translation elongation factor activity; GO:0004686//elongation factor-2 kinase activity; GO:0005509//calcium ion binding; GO:0005516//calmodulin binding; GO:0005524//ATP binding	K08292 elongation factor 2 kinase [EC:2.7.11.20] | (RefSeq) EEF2K, CaMKIII, HSU93850, eEF-2K; eukary	http://www.genome.jp/dbget-bin/www_bget?hsa:29904	-0.516715	6.76489e-15	2.39068e-14	FALSE	-1.05689	1.74048e-47	1.52162e-46	DOWN	0.535819	7.01747e-10	1.9979e-09	FALSE
SMAD4	2664	6.63375	2244	6.32948	2680	6.94781	2554	6.76111	3086	7.56361	2950	7.09459	1619	4.30275	1495	3.98036	1750	4.29256	chr18	48556583	48611412	SMAD4	4089	mothers against decapentaplegic homolog 4	GO:0000122//negative regulation of transcription from RNA polymerase II promoter; GO:0001541//ovarian follicle development; GO:0001658//branching involved in ureteric bud morphogenesis; GO:0001666//response to hypoxia; GO:0001701//in utero embryonic development; GO:0001702//gastrulation with mouth forming second; GO:0003190//atrioventricular valve formation; GO:0003198//epithelial to mesenchymal …	GO:0000790//nuclear chromatin; GO:0005654//nucleoplasm; GO:0005829//cytosol; GO:0032444//activin responsive factor complex; GO:0071141//SMAD protein complex	GO:0000978//RNA polymerase II core promoter proximal region sequence-specific DNA binding; GO:0001076//transcription factor activity, RNA polymerase II transcription factor binding; GO:0001077//transcriptional activator activity, RNA polymerase II core promoter proximal region sequence-specific binding; GO:0001085//RNA polymerase II transcription factor binding; GO:0003682//chromatin binding; GO:…	K04501 mothers against decapentaplegic homolog 4 | (RefSeq) SMAD4, DPC4, JIP, MADH4, MYHRS; SMAD fam	http://www.genome.jp/dbget-bin/www_bget?hsa:4089	-0.0172375	0.754967	0.799236	FALSE	-0.597727	1.66408e-30	9.75521e-30	FALSE	0.576457	1.17398e-23	5.78951e-23	FALSE
SMAD5	3803	11.8436	3067	10.8191	3642	11.8083	2690	8.90599	2648	8.11678	3156	9.49238	2063	6.85696	2125	7.07575	2101	6.44521	chr5	135468534	135518422	SMAD5	4090	mothers against decapentaplegic homolog 5	GO:0001657//ureteric bud development; GO:0001880//Mullerian duct regression; GO:0002051//osteoblast fate commitment; GO:0006468//protein phosphorylation; GO:0007179//transforming growth factor beta receptor signaling pathway; GO:0007281//germ cell development; GO:0009880//embryonic pattern specification; GO:0030218//erythrocyte differentiation; GO:0030509//BMP signaling pathway; GO:0045669//posit…	GO:0005654//nucleoplasm; GO:0005667//transcription factor complex; GO:0005829//cytosol; GO:0016021//integral component of membrane; GO:0071141//SMAD protein complex	GO:0000979//RNA polymerase II core promoter sequence-specific DNA binding; GO:0003700//transcription factor activity, sequence-specific DNA binding; GO:0030618//transforming growth factor beta receptor, pathway-specific cytoplasmic mediator activity; GO:0031625//ubiquitin protein ligase binding; GO:0046872//metal ion binding	K16790 mothers against decapentaplegic homolog 5 | (RefSeq) SMAD5, DWFC, JV5-1, MADH5; SMAD family m	http://www.genome.jp/dbget-bin/www_bget?hsa:4090	-0.501528	1.41363e-18	5.80729e-18	FALSE	-0.69392	1.83624e-45	1.53207e-44	FALSE	0.188066	0.0022016	0.00380764	FALSE
SMAD6	1589	12.0561	1410	12.1177	1386	10.948	1485	11.9779	1388	10.3652	1370	10.0388	621	5.02861	659	5.34593	691	5.16432	chr15	66994674	67074338	SMAD6	4091	mothers against decapentaplegic homolog 6	GO:0001657//ureteric bud development; GO:0003170//heart valve development; GO:0003281//ventricular septum development; GO:0006955//immune response; GO:0007352//zygotic specification of dorsal/ventral axis; GO:0008285//negative regulation of cell proliferation; GO:0010991//negative regulation of SMAD protein complex assembly; GO:0030512//negative regulation of transforming growth factor beta recep…	GO:0005634//nucleus; GO:0005667//transcription factor complex; GO:0005829//cytosol; GO:0016021//integral component of membrane	GO:0000978//RNA polymerase II core promoter proximal region sequence-specific DNA binding; GO:0003682//chromatin binding; GO:0003700//transcription factor activity, sequence-specific DNA binding; GO:0030617//transforming growth factor beta receptor, inhibitory cytoplasmic mediator activity; GO:0031625//ubiquitin protein ligase binding; GO:0034713//type I transforming growth factor beta receptor b…	K04677 mothers against decapentaplegic homolog 6 | (RefSeq) SMAD6, AOVD2, HsT17432, MADH6, MADH7; SM	http://www.genome.jp/dbget-bin/www_bget?hsa:4091	-0.240736	0.000908469	0.00165076	FALSE	-1.11093	9.78859e-63	1.1011e-61	DOWN	0.866395	3.38223e-28	1.91528e-27	FALSE
SMAD7	6126	49.3414	5465	49.8591	5749	48.2075	5102	43.6864	5433	43.0707	5649	43.9426	8120	69.8014	7628	65.6902	9240	73.3094	chr18	46446223	46477081	SMAD7	4092	mothers against decapentaplegic homolog 7 isoform x1	GO:0000122//negative regulation of transcription from RNA polymerase II promoter; GO:0001657//ureteric bud development; GO:0010717//regulation of epithelial to mesenchymal transition; GO:0010719//negative regulation of epithelial to mesenchymal transition; GO:0010801//negative regulation of peptidyl-threonine phosphorylation; GO:0010944//negative regulation of transcription by competitive promote…	GO:0005654//nucleoplasm; GO:0005667//transcription factor complex; GO:0005730//nucleolus; GO:0005737//cytoplasm; GO:0005813//centrosome; GO:0005829//cytosol; GO:0005913//cell-cell adherens junction; GO:0016342//catenin complex	GO:0003700//transcription factor activity, sequence-specific DNA binding; GO:0005518//collagen binding; GO:0008013//beta-catenin binding; GO:0030617//transforming growth factor beta receptor, inhibitory cytoplasmic mediator activity; GO:0031625//ubiquitin protein ligase binding; GO:0034713//type I transforming growth factor beta receptor binding; GO:0044212//transcription regulatory region DNA bi…	K19631 mothers against decapentaplegic homolog 7 | (RefSeq) SMAD7, CRCS3, MADH7, MADH8; SMAD family	http://www.genome.jp/dbget-bin/www_bget?hsa:4092	-0.296216	4.91762e-16	1.82637e-15	FALSE	0.567695	1.79506e-42	1.39488e-41	FALSE	-0.867983	1.85645e-85	2.7796e-84	FALSE
GOLPH3L	1076	7.41208	839	6.54651	1035	7.4226	1156	8.4656	1172	7.94627	1251	8.32272	680	4.99932	751	5.53125	813	5.5166	chr1	150618701	150669672	GOLPH3L	55204	golgi phosphoprotein 3-like	GO:0006890//retrograde vesicle-mediated transport, Golgi to ER; GO:0007030//Golgi organization; GO:0043001//Golgi to plasma membrane protein transport; GO:0048194//Golgi vesicle budding; GO:0050714//positive regulation of protein secretion	GO:0005829//cytosol; GO:0032580//Golgi cisterna membrane; GO:0032588//trans-Golgi network membrane	GO:0005515//protein binding; GO:0070273//phosphatidylinositol-4-phosphate binding	K15620 golgi phosphoprotein 3 | (RefSeq) GOLPH3L, GPP34R; golgi phosphoprotein 3 like	http://www.genome.jp/dbget-bin/www_bget?hsa:55204	0.0861066	0.196723	0.250166	FALSE	-0.349123	2.84862e-06	6.54684e-06	FALSE	0.431447	4.0699e-10	1.17009e-09	FALSE
SMAD1	67	0.4931	57	0.475176	54	0.413754	110	0.860646	104	0.753358	125	0.888485	538	4.22587	460	3.61971	514	3.72629	chr4	146402951	146480328	SMAD1	4086	mothers against decapentaplegic homolog 1	GO:0000165//MAPK cascade; GO:0001657//ureteric bud development; GO:0001710//mesodermal cell fate commitment; GO:0002051//osteoblast fate commitment; GO:0006954//inflammatory response; GO:0007179//transforming growth factor beta receptor signaling pathway; GO:0007183//SMAD protein complex assembly; GO:0007276//gamete generation; GO:0008285//negative regulation of cell proliferation; GO:0009880//em…	GO:0005637//nuclear inner membrane; GO:0005654//nucleoplasm; GO:0005667//transcription factor complex; GO:0005829//cytosol; GO:0016021//integral component of membrane; GO:0071141//SMAD protein complex	GO:0000978//RNA polymerase II core promoter proximal region sequence-specific DNA binding; GO:0000979//RNA polymerase II core promoter sequence-specific DNA binding; GO:0001077//transcriptional activator activity, RNA polymerase II core promoter proximal region sequence-specific binding; GO:0019901//protein kinase binding; GO:0030618//transforming growth factor beta receptor, pathway-specific cyt…	K04676 mothers against decapentaplegic homolog 1 | (RefSeq) SMAD1, BSP-1, BSP1, JV4-1, JV41, MADH1,	http://www.genome.jp/dbget-bin/www_bget?hsa:4086	0.732465	3.30656e-05	6.8702e-05	FALSE	3.12808	5.96827e-114	1.29121e-112	UP	-2.39978	2.59393e-86	3.93583e-85	DOWN
AFTPH	5070	27.2373	4313	26.2456	4925	27.5455	4264	24.3526	4704	24.8732	5060	26.2535	4623	26.5066	4651	26.7152	4712	24.9353	chr2	64751439	64820139	AFTPH	54812	aftiphilin isoform x1	GO:0015031//protein transport; GO:0046907//intracellular transport	GO:0005654//nucleoplasm; GO:0005829//cytosol; GO:0030121//AP-1 adaptor complex	GO:0030276//clathrin binding	no KO assigned | (RefSeq) AFTPH, Nbla10388; aftiphilin	http://www.genome.jp/dbget-bin/www_bget?hsa:54812	-0.224944	6.28169e-08	1.57293e-07	FALSE	0.0126808	0.739611	0.793814	FALSE	-0.241821	6.65305e-08	1.68598e-07	FALSE
SMAD3	1632	6.06993	1488	6.26884	1731	6.70269	1724	6.81668	1897	6.94447	2027	7.28111	2904	11.5275	2938	11.6835	3179	11.6468	chr15	67358195	67487533	SMAD3	4088	mothers against decapentaplegic homolog 3 isoform x1	GO:0000122//negative regulation of transcription from RNA polymerase II promoter; GO:0001657//ureteric bud development; GO:0001666//response to hypoxia; GO:0001701//in utero embryonic development; GO:0001707//mesoderm formation; GO:0001756//somitogenesis; GO:0001889//liver development; GO:0001933//negative regulation of protein phosphorylation; GO:0001947//heart looping; GO:0002076//osteoblast de…	GO:0000790//nuclear chromatin; GO:0005637//nuclear inner membrane; GO:0005654//nucleoplasm; GO:0005829//cytosol; GO:0005886//plasma membrane; GO:0043235//receptor complex; GO:0071144//SMAD2-SMAD3 protein complex	GO:0000978//RNA polymerase II core promoter proximal region sequence-specific DNA binding; GO:0000983//transcription factor activity, RNA polymerase II core promoter sequence-specific; GO:0000988//transcription factor activity, protein binding; GO:0001102//RNA polymerase II activating transcription factor binding; GO:0005160//transforming growth factor beta receptor binding; GO:0005518//collagen …	K23605 mothers against decapentaplegic homolog 3 | (RefSeq) SMAD3, HSPC193, HsT17436, JV15-2, LDS1C,	http://www.genome.jp/dbget-bin/www_bget?hsa:4088	0.0218332	0.707587	0.755125	FALSE	0.937618	1.62871e-85	2.5515e-84	FALSE	-0.919714	6.97524e-86	1.05086e-84	FALSE
RFK	1269	10.2399	963	8.80201	1104	9.27455	1254	10.7573	1433	11.3812	1492	11.6275	916	7.88869	1006	8.67939	1000	7.94857	chr9	79000433	79009444	RFK	55312	riboflavin kinase	GO:0006915//apoptotic process; GO:0009231//riboflavin biosynthetic process; GO:0009398//FMN biosynthetic process; GO:0016310//phosphorylation; GO:0033864//positive regulation of NAD(P)H oxidase activity; GO:0072593//reactive oxygen species metabolic process	GO:0005739//mitochondrion; GO:0005829//cytosol	GO:0005524//ATP binding; GO:0008531//riboflavin kinase activity; GO:0046872//metal ion binding	K00861 riboflavin kinase [EC:2.7.1.26] | (RefSeq) RFK, RIFK; riboflavin kinase	http://www.genome.jp/dbget-bin/www_bget?hsa:55312	0.130722	0.0513384	0.0734765	FALSE	-0.143611	0.0447175	0.0665621	FALSE	0.270573	5.03638e-05	0.000103019	FALSE
AMMECR1L	1592	7.45924	1470	7.8017	1610	7.85354	2441	12.1588	2713	12.5115	2852	12.9057	1676	8.38107	1628	8.15571	1925	8.88455	chr2	128619204	128643514	AMMECR1L	83607	ammecr1-like protein isoform x1	-	GO:0016021//integral component of membrane	-	no KO assigned | (RefSeq) AMMECR1L; AMMECR1 like	http://www.genome.jp/dbget-bin/www_bget?hsa:83607	0.578924	2.45129e-30	1.43539e-29	FALSE	0.20328	0.000115626	0.000234051	FALSE	0.371546	1.13941e-12	3.72081e-12	FALSE
IL1RAPL1	0	0	0	0	2	0.0169773	2	0.0173362	2	0.0160505	0	0	3	0.0261064	0	0	2	0.0160633	chrX	28605681	29974017	IL1RAPL1	11141	interleukin-1 receptor accessory 1	GO:0007157//heterophilic cell-cell adhesion via plasma membrane cell adhesion molecules; GO:0007165//signal transduction; GO:0045920//negative regulation of exocytosis; GO:0050775//positive regulation of dendrite morphogenesis; GO:0070588//calcium ion transmembrane transport; GO:0097105//presynaptic membrane assembly	GO:0005737//cytoplasm; GO:0009986//cell surface; GO:0016021//integral component of membrane; GO:0030424//axon; GO:0030425//dendrite; GO:0045211//postsynaptic membrane	GO:0005102//receptor binding; GO:0005245//voltage-gated calcium channel activity; GO:0019966//interleukin-1 binding	K05170 interleukin 1 receptor accessory protein-like | (RefSeq) IL1RAPL1, IL-1-RAPL-1, IL-1RAPL-1, I	http://www.genome.jp/dbget-bin/www_bget?hsa:11141	0.715141	0.707207	0.754767	FALSE	1.21656	0.484612	0.566863	FALSE	-0.514924	1	1	FALSE
TMPRSS11B	0	0	0	0	0	0	0	0	0	0	0	0	0	0	0	0	0	0	chr4	69092371	69111412	TMPRSS11B	132724	transmembrane protease serine 11b	GO:0006508//proteolysis	GO:0005887//integral component of plasma membrane; GO:0070062//extracellular exosome	GO:0004252//serine-type endopeptidase activity	K09751 transmembrane protease serine 11B [EC:3.4.21.-] | (RefSeq) TMPRSS11B; transmembrane serine pr	http://www.genome.jp/dbget-bin/www_bget?hsa:132724	-	-	-	-	-	-	-	-	-	-	-	-
IGF2R	35095	54.5856	32900	57.9628	35036	56.733	24195	40.0065	25917	39.6758	26454	39.7379	52858	87.7441	53774	89.4254	59368	90.9575	chr6	160390131	160532536	IGF2R	3482	cation-independent mannose-6-phosphate receptor	GO:0001889//liver development; GO:0006898//receptor-mediated endocytosis; GO:0007186//G-protein coupled receptor signaling pathway; GO:0007283//spermatogenesis; GO:0009791//post-embryonic development; GO:0031100//organ regeneration; GO:0032526//response to retinoic acid; GO:0043065//positive regulation of apoptotic process; GO:0048009//insulin-like growth factor receptor signaling pathway	GO:0005615//extracellular space; GO:0005641//nuclear envelope lumen; GO:0005765//lysosomal membrane; GO:0005769//early endosome; GO:0005770//late endosome; GO:0005887//integral component of plasma membrane; GO:0005925//focal adhesion; GO:0009986//cell surface; GO:0030118//clathrin coat; GO:0030139//endocytic vesicle; GO:0030140//trans-Golgi network transport vesicle; GO:0032588//trans-Golgi netwo…	GO:0001948//glycoprotein binding; GO:0001965//G-protein alpha-subunit binding; GO:0001972//retinoic acid binding; GO:0004930//G-protein coupled receptor activity; GO:0005010//insulin-like growth factor-activated receptor activity; GO:0005215//transporter activity; GO:0005537//mannose binding; GO:0019899//enzyme binding; GO:0031995//insulin-like growth factor II binding; GO:0042802//identical prot…	K06564 insulin-like growth factor 2 receptor | (RefSeq) IGF2R, CD222, CI-M6PR, CIMPR, M6P-R, M6P/IGF	http://www.genome.jp/dbget-bin/www_bget?hsa:3482	-0.626212	4.16415e-71	5.36111e-70	FALSE	0.728518	1.55691e-98	2.78519e-97	FALSE	-1.35888	0	0	DOWN
TMPRSS11D	2	0.0156979	4	0.0355624	6	0.0490287	3	0.0250325	7	0.0540775	6	0.0454823	5	0.0418846	2	0.016784	1	0.0077315	chr4	68686594	68749716	TMPRSS11D	9407	transmembrane protease serine 11d	GO:0006508//proteolysis; GO:0007585//respiratory gaseous exchange	GO:0005887//integral component of plasma membrane; GO:0070062//extracellular exosome	GO:0004252//serine-type endopeptidase activity	K09641 transmembrane protease serine 11D [EC:3.4.21.-] | (RefSeq) TMPRSS11D, HAT; transmembrane seri	http://www.genome.jp/dbget-bin/www_bget?hsa:9407	0.205159	0.873465	0.905472	FALSE	-0.520542	0.575132	0.641276	FALSE	0.721054	0.397319	0.467917	FALSE
TMPRSS11E	0	0	0	0	0	0	0	0	0	0	0	0	0	0	0	0	0	0	chr4	69313167	69363322	TMPRSS11E	28983	transmembrane protease serine 11e	GO:0006508//proteolysis; GO:0050890//cognition	GO:0005576//extracellular region; GO:0005887//integral component of plasma membrane	GO:0004252//serine-type endopeptidase activity	K09642 transmembrane protease serine 11E [EC:3.4.21.-] | (RefSeq) TMPRSS11E, DESC1, TMPRSS11E2; tran	http://www.genome.jp/dbget-bin/www_bget?hsa:28983	-	-	-	-	-	-	-	-	-	-	-	-
TMPRSS11F	6	0.0631013	2	0.0238253	8	0.0875922	11	0.122985	7	0.0724591	14	0.142199	24	0.269385	8	0.0899566	20	0.207191	chr4	68918916	68995587	TMPRSS11F	389208	transmembrane protease serine 11f	GO:0006508//proteolysis	GO:0005576//extracellular region; GO:0005887//integral component of plasma membrane	GO:0004252//serine-type endopeptidase activity	K09752 transmembrane protease serine 11F [EC:3.4.21.-] | (RefSeq) TMPRSS11F; transmembrane serine pr	http://www.genome.jp/dbget-bin/www_bget?hsa:389208	0.797565	0.158477	0.204856	FALSE	1.72578	0.00134366	0.00246168	UP	-0.932162	0.0508444	0.0726275	FALSE
HS3ST2	0	0	4	0.0507019	0	0	0	0	0	0	0	0	0	0	0	0	0	0	chr16	22825860	22927659	HS3ST2	9956	heparan sulfate glucosamine 3-o-sulfotransferase 2	GO:0006024//glycosaminoglycan biosynthetic process; GO:0007623//circadian rhythm	GO:0000139//Golgi membrane; GO:0016021//integral component of membrane	GO:0008467//[heparan sulfate]-glucosamine 3-sulfotransferase 1 activity; GO:0033871//[heparan sulfate]-glucosamine 3-sulfotransferase 2 activity	K07808 [heparan sulfate]-glucosamine 3-sulfotransferase 2 [EC:2.8.2.29] | (RefSeq) HS3ST2, 30ST2, 3O	http://www.genome.jp/dbget-bin/www_bget?hsa:9956	-3.65406	0.141991	0.18553	FALSE	-3.5407	0.14041	0.188266	FALSE	-	-	-	-
GIMAP4	33	0.366839	16	0.201466	20	0.231462	5	0.0590886	15	0.16412	27	0.289871	105	1.24573	106	1.25986	75	0.821251	chr7	150264458	150271041	GIMAP4	55303	gtpase imap family member 4	-	GO:0005829//cytosol	GO:0005525//GTP binding	no KO assigned | (RefSeq) GIMAP4, IAN-1, IAN1, IMAP4, MSTP062; GTPase, IMAP family member 4	http://www.genome.jp/dbget-bin/www_bget?hsa:55303	-0.750478	0.122522	0.164044	FALSE	2.1042	5.32014e-14	1.84706e-13	UP	-2.86052	1.24952e-15	4.67304e-15	DOWN
HS3ST1	50	0.555816	38	0.478481	44	0.509216	254	3.0017	247	2.7025	327	3.51066	413	4.89988	389	4.62345	391	4.28145	chr4	11399988	11430537	HS3ST1	9957	heparan sulfate glucosamine 3-o-sulfotransferase 1	GO:0006024//glycosaminoglycan biosynthetic process	GO:0005796//Golgi lumen; GO:0016021//integral component of membrane	GO:0008467//[heparan sulfate]-glucosamine 3-sulfotransferase 1 activity	K01024 [heparan sulfate]-glucosamine 3-sulfotransferase 1 [EC:2.8.2.23] | (RefSeq) HS3ST1, 3OST, 3OS	http://www.genome.jp/dbget-bin/www_bget?hsa:9957	2.44959	1.26918e-45	1.0666e-44	UP	3.2186	2.65858e-104	5.04341e-103	UP	-0.773463	3.3558e-11	1.02257e-10	FALSE
RAD21L1	0	0	0	0	0	0	0	0	0	0	2	0.0233365	0	0	0	0	0	0	chr20	1206764	1235145	RAD21L1	642636	double-strand-break repair protein rad21-like protein 1	GO:0000724//double-strand break repair via homologous recombination; GO:0007130//synaptonemal complex assembly; GO:0007283//spermatogenesis; GO:0009566//fertilization; GO:0070197//attachment of telomere to nuclear envelope; GO:0072520//seminiferous tubule development	GO:0000800//lateral element; GO:0034991//nuclear meiotic cohesin complex	-	no KO assigned | (RefSeq) RAD21L1, RAD21L, dJ545L17.2; RAD21 cohesin complex component like 1	http://www.genome.jp/dbget-bin/www_bget?hsa:642636	2.57928	0.511207	0.569478	FALSE	-	-	-	-	2.56066	0.511973	0.570784	FALSE
PLRG1	1574	10.2786	1423	10.5257	1531	10.4086	1595	11.0729	1564	10.0525	1787	11.2702	1488	10.3706	1421	9.9215	1631	10.4914	chr4	155456149	155471585	PLRG1	5356	pleiotropic regulator 1	GO:0000398//mRNA splicing, via spliceosome; GO:0034504//protein localization to nucleus; GO:1900087//positive regulation of G1/S transition of mitotic cell cycle	GO:0000974//Prp19 complex; GO:0005662//DNA replication factor A complex; GO:0005730//nucleolus; GO:0016021//integral component of membrane; GO:0016607//nuclear speck; GO:0031965//nuclear membrane; GO:0071011//precatalytic spliceosome; GO:0071013//catalytic step 2 spliceosome; GO:0080008//Cul4-RING E3 ubiquitin ligase complex	GO:0005515//protein binding	K12862 pleiotropic regulator 1 | (RefSeq) PLRG1, Cwc1, PRL1, PRP46, PRPF46, TANGO4; pleiotropic regu	http://www.genome.jp/dbget-bin/www_bget?hsa:5356	-0.0690902	0.237172	0.296413	FALSE	0.0458201	0.366883	0.444885	FALSE	-0.118744	0.0483959	0.0693925	FALSE
SLC36A3	3	0.0224267	3	0.025403	11	0.08561	5	0.0397361	3	0.0220736	6	0.0433187	12	0.0957412	5	0.039964	13	0.0957283	chr5	150655926	150683334	SLC36A3	285641	proton-coupled amino acid transporter 3 isoform x1	GO:0015808//L-alanine transport; GO:0015816//glycine transport; GO:0035524//proline transmembrane transport; GO:1902600//hydrogen ion transmembrane transport	GO:0005886//plasma membrane; GO:0016021//integral component of membrane; GO:0070062//extracellular exosome	GO:0005280//hydrogen:amino acid symporter activity; GO:0015078//hydrogen ion transmembrane transporter activity; GO:0015180//L-alanine transmembrane transporter activity; GO:0015187//glycine transmembrane transporter activity; GO:0015193//L-proline transmembrane transporter activity	K14209 solute carrier family 36 (proton-coupled amino acid transporter) | (RefSeq) SLC36A3, PAT3, TR	http://www.genome.jp/dbget-bin/www_bget?hsa:285641	-0.461527	0.584808	0.641873	FALSE	0.844812	0.211512	0.272616	FALSE	-1.31314	0.0284582	0.0425869	DOWN
CKS1B	176	4.71136	173	5.24566	215	5.99184	454	12.92	574	15.1235	505	13.0559	376	10.7423	359	10.275	390	10.2838	chr1	154947118	154951725	CKS1B	1163	cyclin-dependent kinases regulatory subunit 1	GO:0007346//regulation of mitotic cell cycle; GO:0008283//cell proliferation; GO:0009790//embryo development; GO:0032147//activation of protein kinase activity; GO:0044772//mitotic cell cycle phase transition; GO:0045737//positive regulation of cyclin-dependent protein serine/threonine kinase activity; GO:0045893//positive regulation of transcription, DNA-templated; GO:0051301//cell division	GO:0000307//cyclin-dependent protein kinase holoenzyme complex; GO:0005654//nucleoplasm; GO:0019005//SCF ubiquitin ligase complex	GO:0016301//kinase activity; GO:0019901//protein kinase binding; GO:0042393//histone binding; GO:0043130//ubiquitin binding; GO:0061575//cyclin-dependent protein serine/threonine kinase activator activity	K02219 cyclin-dependent kinase regulatory subunit CKS1 | (RefSeq) CKS1B, CKS1, PNAS-16, PNAS-18, cks	http://www.genome.jp/dbget-bin/www_bget?hsa:1163	1.24365	2.5595e-25	1.29949e-24	UP	1.038	5.91701e-19	2.49029e-18	UP	0.201734	0.0391895	0.0574226	FALSE
SLC36A1	4983	39.2381	4486	40.0126	4896	40.1372	4886	40.9018	5302	41.0927	5454	41.4775	4213	35.4065	4086	34.401	4457	34.5711	chr5	150816553	150871942	SLC36A1	206358	proton-coupled amino acid transporter 1 isoform x2	GO:0015808//L-alanine transport; GO:0015816//glycine transport; GO:0035524//proline transmembrane transport; GO:1902600//hydrogen ion transmembrane transport	GO:0005765//lysosomal membrane; GO:0005783//endoplasmic reticulum; GO:0005886//plasma membrane; GO:0016021//integral component of membrane	GO:0005280//hydrogen:amino acid symporter activity; GO:0015078//hydrogen ion transmembrane transporter activity; GO:0015180//L-alanine transmembrane transporter activity; GO:0015187//glycine transmembrane transporter activity; GO:0015193//L-proline transmembrane transporter activity	K14209 solute carrier family 36 (proton-coupled amino acid transporter) | (RefSeq) SLC36A1, Dct1, LY	http://www.genome.jp/dbget-bin/www_bget?hsa:206358	-0.0740428	0.0434325	0.0629118	FALSE	-0.128602	0.000237396	0.000468456	FALSE	0.050506	0.184012	0.23438	FALSE
EXOG	175	1.19382	187	1.44499	191	1.35651	239	1.7333	330	2.21577	369	2.43113	200	1.45615	201	1.46607	221	1.48507	chr3	38537763	38567796	EXOG	9941	nuclease mitochondrial isoform x1	GO:0090305//nucleic acid phosphodiester bond hydrolysis	GO:0005743//mitochondrial inner membrane; GO:0016021//integral component of membrane; GO:0043234//protein complex	GO:0003676//nucleic acid binding; GO:0004519//endonuclease activity; GO:0004527//exonuclease activity; GO:0046872//metal ion binding	K15050 nuclease EXOG, mitochondrial | (RefSeq) EXOG, ENDOGL1, ENDOGL2, ENGL, ENGL-a, ENGL-b, ENGLA,	http://www.genome.jp/dbget-bin/www_bget?hsa:9941	0.555843	0.000177566	0.000346149	FALSE	0.209087	0.108318	0.150094	FALSE	0.343508	0.013109	0.020631	FALSE
HYI	0	0	0	0	0	0	0	0	0	0	0	0	0	0	0	0	0	0	chr1	43916674	43919660	HYI	81888	hydroxypyruvate isomerase isoform x2	-	-	GO:0005515//protein binding; GO:0008903//hydroxypyruvate isomerase activity	K01816 hydroxypyruvate isomerase [EC:5.3.1.22] | (RefSeq) HYI, HT036; hydroxypyruvate isomerase (put	http://www.genome.jp/dbget-bin/www_bget?hsa:81888	-	-	-	-	-	-	-	-	-	-	-	-
MROH2A	0	0	9	0.0418262	0	0	2	0.00872344	1	0.00403825	6	0.0237748	5	0.0218942	4	0.0175469	0	0	chr2	234684325	234742069	MROH2A	339766	---	-	-	-	no KO assigned | (RefSeq) MROH2A, HEATR7B1; maestro heat like repeat family member 2A	http://www.genome.jp/dbget-bin/www_bget?hsa:339766	-0.225768	0.844216	0.879517	FALSE	0.0219223	1	1	FALSE	-0.252271	0.845816	0.881612	FALSE
RNF112	4	0.0270676	6	0.0459898	6	0.0422698	40	0.287755	27	0.17983	36	0.235273	8	0.0577769	5	0.0361756	2	0.0133313	chr17	19314491	19320589	RNF112	7732	ring finger protein 112	GO:0045666//positive regulation of neuron differentiation; GO:0045687//positive regulation of glial cell differentiation; GO:0071158//positive regulation of cell cycle arrest	GO:0005634//nucleus; GO:0005737//cytoplasm; GO:0016021//integral component of membrane	GO:0003924//GTPase activity; GO:0005525//GTP binding; GO:0008270//zinc ion binding	no KO assigned | (RefSeq) RNF112, BFP, ZNF179; ring finger protein 112	http://www.genome.jp/dbget-bin/www_bget?hsa:7732	2.46673	1.13108e-09	3.14919e-09	UP	-0.0459339	1	1	FALSE	2.50946	4.82173e-09	1.30707e-08	UP
ERICH5	0	0	4	0.0922368	3	0.0635819	14	0.302987	13	0.260481	18	0.353897	2	0.0434538	0	0	1	0.0200529	chr8	99076750	99105838	ERICH5	203111	---	-	-	-	no KO assigned | (RefSeq) ERICH5, C8orf47; glutamate rich 5	http://www.genome.jp/dbget-bin/www_bget?hsa:203111	2.42389	4.0784e-05	8.41292e-05	UP	-1.10099	0.390093	0.469744	FALSE	3.51927	3.92312e-07	9.46875e-07	UP
ERICH4	1	0.0230905	2	0.0523098	0	0	3	0.0736421	4	0.0909077	0	0	0	0	0	0	1	0.022745	chr19	41949063	41950670	ERICH4	100170765	---	-	-	-	no KO assigned | (RefSeq) ERICH4, C19orf69; glutamate rich 4	http://www.genome.jp/dbget-bin/www_bget?hsa:100170765	0.947526	0.394419	0.464834	FALSE	-1.26863	0.639814	0.703681	FALSE	2.22905	0.0972814	0.131855	FALSE
ERICH3	6	0.0183072	4	0.0138246	4	0.0127063	3	0.00973116	3	0.0090095	4	0.0117872	13	0.042334	10	0.0326232	2	0.00601111	chr1	75033795	75139422	ERICH3	127254	---	-	-	-	no KO assigned | (RefSeq) ERICH3, C1orf173; glutamate rich 3	http://www.genome.jp/dbget-bin/www_bget?hsa:127254	-0.65916	0.362611	0.431506	FALSE	0.881283	0.196754	0.255455	FALSE	-1.54577	0.034063	0.0503362	FALSE
ERICH2	5	0.10771	4	0.0976036	6	0.134563	7	0.160308	2	0.0424057	3	0.0624148	3	0.0689733	0	0	0	0	chr2	171627192	171655481	ERICH2	285141	glutamate-rich protein 2 isoform x1	-	-	GO:0005515//protein binding	no KO assigned | (RefSeq) ERICH2; glutamate rich 2	http://www.genome.jp/dbget-bin/www_bget?hsa:285141	-0.494466	0.516972	0.575483	FALSE	-2.1416	0.0210055	0.033056	DOWN	1.6551	0.100287	0.135604	FALSE
ERICH1	680	5.94859	558	5.52917	589	5.36425	787	7.31901	864	7.43921	956	8.07687	872	8.14134	811	7.58546	906	7.80705	chr8	564737	681239	ERICH1	157697	Glutamate-rich protein 1	-	-	-	no KO assigned | (RefSeq) ERICH1, HSPC319; glutamate rich 1	http://www.genome.jp/dbget-bin/www_bget?hsa:157697	0.316481	3.91977e-05	8.09754e-05	FALSE	0.547233	2.26613e-14	7.97579e-14	FALSE	-0.23474	0.000921041	0.00166071	FALSE
ARTN	104	1.20452	77	1.01017	118	1.42283	79	0.972705	72	0.820772	76	0.850112	61	0.754025	77	0.953517	77	0.878468	chr1	44398992	44402912	ARTN	9048	artemin isoform x2	GO:0000165//MAPK cascade; GO:0007405//neuroblast proliferation; GO:0007411//axon guidance; GO:0007422//peripheral nervous system development; GO:0043547//positive regulation of GTPase activity; GO:0050930//induction of positive chemotaxis; GO:0061146//Peyer's patch morphogenesis; GO:0097021//lymphocyte migration into lymphoid organs	GO:0005615//extracellular space; GO:0005622//intracellular	GO:0005088//Ras guanyl-nucleotide exchange factor activity; GO:0008083//growth factor activity	no KO assigned | (RefSeq) ARTN, ART, ENOVIN, EVN, NBN; artemin	http://www.genome.jp/dbget-bin/www_bget?hsa:9048	-0.587072	0.00188684	0.00331634	FALSE	-0.428364	0.0279014	0.042993	FALSE	-0.162636	0.41726	0.488355	FALSE
ART1	0	0	0	0	0	0	2	0.0353991	6	0.0983216	2	0.0321588	2	0.0355381	0	0	1	0.0164	chr11	3666361	3685646	ART1	417	gpi-linked nad (+)--arginine adp-ribosyltransferase 1	GO:0006471//protein ADP-ribosylation	GO:0005887//integral component of plasma membrane; GO:0009986//cell surface; GO:0031225//anchored component of membrane; GO:0033017//sarcoplasmic reticulum membrane	GO:0003950//NAD+ ADP-ribosyltransferase activity; GO:0003956//NAD(P)+-protein-arginine ADP-ribosyltransferase activity	K06716 ADP-ribosyltransferase 1 [EC:2.4.2.31] | (RefSeq) ART1, ART2, ARTC1, CD296, RT6; ADP-ribosylt	http://www.genome.jp/dbget-bin/www_bget?hsa:417	4.69659	0.00781754	0.0127236	UP	3.18937	0.265261	0.332391	FALSE	1.3924	0.20155	0.254611	FALSE
HRH3	0	0	0	0	0	0	0	0	0	0	2	0.0157434	0	0	0	0	0	0	chr20	60790017	60795323	HRH3	11255	histamine h3 receptor	GO:0007194//negative regulation of adenylate cyclase activity; GO:0007197//adenylate cyclase-inhibiting G-protein coupled acetylcholine receptor signaling pathway; GO:0007204//positive regulation of cytosolic calcium ion concentration; GO:0007207//phospholipase C-activating G-protein coupled acetylcholine receptor signaling pathway; GO:0007269//neurotransmitter secretion; GO:0007271//synaptic tra…	GO:0005887//integral component of plasma membrane; GO:0043005//neuron projection; GO:0043209//myelin sheath; GO:0098793//presynapse	GO:0004969//histamine receptor activity; GO:0008144//drug binding; GO:0016907//G-protein coupled acetylcholine receptor activity	K04151 histamine receptor H3 | (RefSeq) HRH3, GPCR97, HH3R; histamine receptor H3	http://www.genome.jp/dbget-bin/www_bget?hsa:11255	2.57928	0.511207	0.569478	FALSE	-	-	-	-	2.56066	0.511973	0.570784	FALSE
ART3	0	0	0	0	0	0	2	0.0297906	0	0	0	0	0	0	0	0	2	0.0276033	chr4	76932333	77033955	ART3	419	adp-ribosyltransferase 3	GO:0006471//protein ADP-ribosylation	GO:0005887//integral component of plasma membrane; GO:0031225//anchored component of membrane; GO:0070062//extracellular exosome	GO:0003950//NAD+ ADP-ribosyltransferase activity; GO:0003956//NAD(P)+-protein-arginine ADP-ribosyltransferase activity	K00775 ADP-ribosyltransferase 3 [EC:2.4.2.31] | (RefSeq) ART3, ARTC3; ADP-ribosyltransferase 3	http://www.genome.jp/dbget-bin/www_bget?hsa:419	2.59043	0.511207	0.569478	FALSE	2.67555	0.510174	0.576575	FALSE	-0.19084	1	1	FALSE
ART5	2	0.0305078	2	0.0345566	0	0	4	0.0648654	0	0	3	0.0441959	4	0.0651201	2	0.0326187	2	0.0300514	chr11	3659736	3663546	ART5	116969	ecto-adp-ribosyltransferase 5 isoform x1	GO:0006471//protein ADP-ribosylation	GO:0005576//extracellular region; GO:0016020//membrane	GO:0003950//NAD+ ADP-ribosyltransferase activity; GO:0003953//NAD+ nucleosidase activity; GO:0003956//NAD(P)+-protein-arginine ADP-ribosyltransferase activity	K19977 ADP-ribosyltransferase 5 [EC:2.4.2.31] | (RefSeq) ART5, ARTC5; ADP-ribosyltransferase 5	http://www.genome.jp/dbget-bin/www_bget?hsa:116969	0.574313	0.593507	0.649651	FALSE	0.978124	0.440852	0.52158	FALSE	-0.412128	0.833871	0.87087	FALSE
ART4	0	0	0	0	0	0	0	0	0	0	0	0	0	0	0	0	0	0	chr12	14982245	14996413	ART4	420	ecto-adp-ribosyltransferase 4	GO:0000469//cleavage involved in rRNA processing; GO:0006471//protein ADP-ribosylation; GO:0006525//arginine metabolic process; GO:0007601//visual perception; GO:0030490//maturation of SSU-rRNA; GO:0090502//RNA phosphodiester bond hydrolysis, endonucleolytic	GO:0005654//nucleoplasm; GO:0005829//cytosol; GO:0005886//plasma membrane; GO:0016021//integral component of membrane; GO:0030688//preribosome, small subunit precursor; GO:0031225//anchored component of membrane	GO:0003956//NAD(P)+-protein-arginine ADP-ribosyltransferase activity; GO:0004521//endoribonuclease activity; GO:0046872//metal ion binding	K06717 ADP-ribosyltransferase 4 [EC:2.4.2.31] | (RefSeq) ART4, ARTC4, CD297, DO, DO/ART4, DOK1; ADP-	http://www.genome.jp/dbget-bin/www_bget?hsa:420	-	-	-	-	-	-	-	-	-	-	-	-
RIC1	3398	12.9086	3113	13.3954	3272	12.9407	5267	21.2712	5982	22.3671	5964	21.8813	3531	14.3162	3703	15.0406	3833	14.3433	chr9	5629119	5776557	RIC1	57589	rab6a-gef complex partner protein 1 isoform x1	GO:0042147//retrograde transport, endosome to Golgi; GO:0043547//positive regulation of GTPase activity; GO:1903363//negative regulation of cellular protein catabolic process	GO:0005829//cytosol; GO:0016021//integral component of membrane; GO:0032588//trans-Golgi network membrane; GO:0034066//RIC1-RGP1 guanyl-nucleotide exchange factor complex	GO:0017112//Rab guanyl-nucleotide exchange factor activity; GO:0017137//Rab GTPase binding	K20476 RAB6A-GEF complex partner protein 1 | (RefSeq) RIC1, CIP150, KIAA1432, bA207C16.1; RIC1 homol	http://www.genome.jp/dbget-bin/www_bget?hsa:57589	0.617151	1.11192e-52	1.06093e-51	FALSE	0.22049	3.3047e-08	8.63654e-08	FALSE	0.392586	4.269e-21	1.93718e-20	FALSE
SPTLC1	3466	33.799	2949	32.574	3297	33.4721	3394	35.1852	3895	37.3845	3930	37.0125	3319	34.5428	3171	33.0619	3596	34.5421	chr9	94793416	94877756	SPTLC1	10558	serine palmitoyltransferase 1 isoform x2	GO:0006686//sphingomyelin biosynthetic process; GO:0046511//sphinganine biosynthetic process; GO:0046512//sphingosine biosynthetic process; GO:0046513//ceramide biosynthetic process; GO:1904504//positive regulation of lipophagy	GO:0016021//integral component of membrane; GO:0035339//SPOTS complex	GO:0004758//serine C-palmitoyltransferase activity; GO:0005515//protein binding; GO:0030170//pyridoxal phosphate binding	K00654 serine palmitoyltransferase [EC:2.3.1.50] | (RefSeq) SPTLC1, HSAN1, HSN1, LBC1, LCB1, SPT1, S	http://www.genome.jp/dbget-bin/www_bget?hsa:10558	0.01168	0.784803	0.824884	FALSE	0.098017	0.0100171	0.0165168	FALSE	-0.0903754	0.0380386	0.0558565	FALSE
TCEA2	639	8.31331	541	7.97243	512	6.93476	505	6.98452	540	6.91472	489	6.14415	432	5.99834	358	4.9798	430	5.51055	chr20	62688439	62703700	TCEA2	6919	transcription elongation factor a protein 2 isoform x1	GO:0006414//translational elongation; GO:0032784//regulation of DNA-templated transcription, elongation; GO:0045944//positive regulation of transcription from RNA polymerase II promoter	GO:0005813//centrosome; GO:0008023//transcription elongation factor complex	GO:0003677//DNA binding; GO:0003746//translation elongation factor activity; GO:0005515//protein binding; GO:0008270//zinc ion binding	K03145 transcription elongation factor S-II | (RefSeq) TCEA2, TFIIS; transcription elongation factor	http://www.genome.jp/dbget-bin/www_bget?hsa:6919	-0.335592	0.000526426	0.000979924	FALSE	-0.428505	2.41967e-05	5.19031e-05	FALSE	0.0890568	0.377574	0.446831	FALSE
TCEA3	4	0.0499282	3	0.0424158	0	0	0	0	0	0	0	0	0	0	0	0	0	0	chr1	23707402	23751272	TCEA3	6920	transcription elongation factor a protein 3	GO:0006357//regulation of transcription from RNA polymerase II promoter; GO:0006414//translational elongation; GO:0032784//regulation of DNA-templated transcription, elongation	GO:0005634//nucleus	GO:0003677//DNA binding; GO:0003746//translation elongation factor activity; GO:0008270//zinc ion binding	no KO assigned | (RefSeq) TCEA3, TFIIS, TFIIS.H; transcription elongation factor A3	http://www.genome.jp/dbget-bin/www_bget?hsa:6920	-4.3943	0.0237846	0.0360573	DOWN	-4.27732	0.0229668	0.0358677	DOWN	-	-	-	-
TCEA1	8142	64.5321	7231	64.9177	7972	65.7809	7833	66.0001	8771	68.4229	9031	69.1291	4167	35.2486	4193	35.5324	4495	35.0936	chr8	54879114	54935016	TCEA1	6917	transcription elongation factor a protein 1 isoform x2	GO:0006283//transcription-coupled nucleotide-excision repair; GO:0006357//regulation of transcription from RNA polymerase II promoter; GO:0006368//transcription elongation from RNA polymerase II promoter; GO:0006414//translational elongation; GO:0032784//regulation of DNA-templated transcription, elongation; GO:1901919//positive regulation of exoribonuclease activity	GO:0005654//nucleoplasm; GO:0005730//nucleolus	GO:0003677//DNA binding; GO:0003746//translation elongation factor activity; GO:0005515//protein binding; GO:0008270//zinc ion binding	K03145 transcription elongation factor S-II | (RefSeq) TCEA1, GTF2S, SII, TCEA, TF2S, TFIIS; transcr	http://www.genome.jp/dbget-bin/www_bget?hsa:6917	-0.0623415	0.0845481	0.116256	FALSE	-0.817668	3.56345e-139	9.86442e-138	FALSE	0.751244	1.58861e-86	2.41907e-85	FALSE
RFPL1	171	2.49683	124	2.05085	163	2.47781	191	2.96482	283	4.06712	266	3.75106	47	0.732427	59	0.921085	49	0.704761	chr22	29834572	29838444	RFPL1	5988	ret finger 1	-	-	GO:0005515//protein binding; GO:0008270//zinc ion binding	no KO assigned | (RefSeq) RFPL1, RNF78; ret finger protein like 1	http://www.genome.jp/dbget-bin/www_bget?hsa:5988	0.495045	0.00111127	0.00200078	FALSE	-1.5119	4.46382e-17	1.74617e-16	DOWN	2.00267	2.04023e-27	1.12863e-26	UP
C16orf62	996	5.79393	862	5.67991	918	5.55962	1398	8.64556	1433	8.2048	1553	8.725	1057	6.5624	1033	6.42495	1172	6.71575	chr16	19566737	19712485	C16orf62	57020	upf0505 protein c16orf62 homolog isoform x1	GO:0006893//Golgi to plasma membrane transport; GO:0015031//protein transport	GO:0005769//early endosome; GO:0016021//integral component of membrane	GO:0005515//protein binding	no KO assigned | (RefSeq) VPS35L, C16orf62; VPS35 endosomal protein sorting factor like	http://www.genome.jp/dbget-bin/www_bget?hsa:57020	0.463413	4.25051e-15	1.5186e-14	FALSE	0.275527	4.34663e-06	9.85082e-06	FALSE	0.183925	0.0021342	0.00369484	FALSE
BFAR	2690	20.574	2185	18.9294	2624	20.8938	2957	24.043	3163	23.8107	3514	25.9566	2248	18.35	2238	18.3013	2400	18.0813	chr16	14726668	14763093	BFAR	51283	bifunctional apoptosis regulator	GO:0042787//protein ubiquitination involved in ubiquitin-dependent protein catabolic process; GO:0043066//negative regulation of apoptotic process; GO:0043161//proteasome-mediated ubiquitin-dependent protein catabolic process; GO:0051865//protein autoubiquitination; GO:0070534//protein K63-linked ubiquitination; GO:0070936//protein K48-linked ubiquitination; GO:1903895//negative regulation of IRE…	GO:0005887//integral component of plasma membrane; GO:0030176//integral component of endoplasmic reticulum membrane	GO:0008270//zinc ion binding; GO:0030674//protein binding, bridging; GO:0061630//ubiquitin protein ligase activity; GO:0089720//caspase binding	K15684 bifunctional apoptosis regulator | (RefSeq) BFAR, BAR, RNF47; bifunctional apoptosis regulato	http://www.genome.jp/dbget-bin/www_bget?hsa:51283	0.16637	0.00125337	0.00224753	FALSE	-0.0774754	0.10059	0.14036	FALSE	0.239738	6.2885e-07	1.49715e-06	FALSE
MROH2B	0	0	0	0	0	0	0	0	0	0	0	0	0	0	0	0	0	0	chr5	40998122	41071444	MROH2B	133558	---	-	-	-	no KO assigned | (RefSeq) MROH2B, HEATR7B2, SPIF; maestro heat like repeat family member 2B	http://www.genome.jp/dbget-bin/www_bget?hsa:133558	-	-	-	-	-	-	-	-	-	-	-	-
ZC3H18	2531	14.692	2334	15.3465	2408	14.5524	2858	17.637	3080	17.5974	3213	18.0128	1876	11.6224	1932	11.9909	2225	12.7225	chr16	88636789	88698372	ZC3H18	124245	zinc finger ccch domain-containing protein 18 isoform x1	-	GO:0005654//nucleoplasm	GO:0005515//protein binding; GO:0044822//poly(A) RNA binding; GO:0046872//metal ion binding	K13092 nuclear protein NHN1 | (RefSeq) ZC3H18, NHN1; zinc finger CCCH-type containing 18	http://www.genome.jp/dbget-bin/www_bget?hsa:124245	0.133685	0.00334717	0.00572306	FALSE	-0.229327	4.14353e-06	9.40591e-06	FALSE	0.358852	2.74615e-13	9.22475e-13	FALSE
HCAR3	19	0.194211	23	0.266298	11	0.117058	26	0.28253	42	0.422548	50	0.493594	32	0.349095	26	0.28415	42	0.422885	chr12	123199303	123201439	HCAR3	8843	hydroxycarboxylic acid receptor 2	GO:0007186//G-protein coupled receptor signaling pathway; GO:0033031//positive regulation of neutrophil apoptotic process; GO:0050995//negative regulation of lipid catabolic process; GO:0070165//positive regulation of adiponectin secretion	GO:0005887//integral component of plasma membrane; GO:0030054//cell junction	GO:0070553//nicotinic acid receptor activity	K08402 hydroxycarboxylic acid receptor 2/3 | (RefSeq) HCAR3, GPR109B, HCA3, HM74, PUMAG, Puma-g; hyd	http://www.genome.jp/dbget-bin/www_bget?hsa:8843	0.939351	0.00794683	0.0129204	FALSE	0.943171	0.00661029	0.0111616	FALSE	-0.0071538	1	1	FALSE
CRTAM	73	0.725799	53	0.596884	45	0.465795	109	1.15211	109	1.06667	100	0.960227	77	0.817069	70	0.744128	38	0.372161	chr11	122709206	122743347	CRTAM	56253	cytotoxic and regulatory t-cell molecule	GO:0001913//T cell mediated cytotoxicity; GO:0002355//detection of tumor cell; GO:0002860//positive regulation of natural killer cell mediated cytotoxicity directed against tumor cell target; GO:0007156//homophilic cell adhesion via plasma membrane adhesion molecules; GO:0007157//heterophilic cell-cell adhesion via plasma membrane cell adhesion molecules; GO:0008037//cell recognition; GO:0050715/…	GO:0005887//integral component of plasma membrane; GO:0005913//cell-cell adherens junction	GO:0004872//receptor activity; GO:0005102//receptor binding; GO:0042803//protein homodimerization activity; GO:0050839//cell adhesion molecule binding	K16361 cytotoxic and regulatory T-cell molecule | (RefSeq) CRTAM, CD355; cytotoxic and regulatory T	http://www.genome.jp/dbget-bin/www_bget?hsa:56253	0.702391	0.000422535	0.000794667	FALSE	0.17274	0.59208	0.65766	FALSE	0.529147	0.0395448	0.0579179	FALSE
EDA	11	0.0682612	15	0.105437	18	0.11629	32	0.211107	19	0.116049	24	0.143838	4	0.026492	12	0.0796192	4	0.0244509	chrX	68835911	69259322	EDA	1896	ectodysplasin-a isoform x1	GO:0006955//immune response; GO:0007160//cell-matrix adhesion; GO:0007398//ectoderm development; GO:0010628//positive regulation of gene expression; GO:0030154//cell differentiation; GO:0033209//tumor necrosis factor-mediated signaling pathway; GO:0042346//positive regulation of NF-kappaB import into nucleus; GO:0042475//odontogenesis of dentin-containing tooth; GO:0043473//pigmentation; GO:00510…	GO:0005576//extracellular region; GO:0005581//collagen trimer; GO:0005789//endoplasmic reticulum membrane; GO:0005856//cytoskeleton; GO:0005887//integral component of plasma membrane; GO:0045177//apical part of cell	GO:0005164//tumor necrosis factor receptor binding	K05480 ectodysplasin-A | (RefSeq) EDA, ECTD1, ED1, ED1-A1, ED1-A2, EDA-A1, EDA-A2, EDA1, EDA2, HED,	http://www.genome.jp/dbget-bin/www_bget?hsa:1896	0.572007	0.130632	0.174145	FALSE	-1.07971	0.0410898	0.0618372	FALSE	1.64885	0.000468778	0.000872076	UP
CTSS	8752	47.4144	8561	52.5349	9235	52.0869	23922	137.776	26624	141.966	28746	150.405	26954	155.848	27083	156.876	27494	146.722	chr1	150702672	150738433	CTSS	1520	cathepsin s	GO:0002224//toll-like receptor signaling pathway; GO:0002250//adaptive immune response; GO:0010447//response to acidic pH; GO:0016485//protein processing; GO:0019886//antigen processing and presentation of exogenous peptide antigen via MHC class II; GO:0030574//collagen catabolic process; GO:0034769//basement membrane disassembly; GO:0051603//proteolysis involved in cellular protein catabolic pro…	GO:0005615//extracellular space; GO:0036021//endolysosome lumen	GO:0001968//fibronectin binding; GO:0004197//cysteine-type endopeptidase activity; GO:0004252//serine-type endopeptidase activity; GO:0005518//collagen binding; GO:0043236//laminin binding; GO:0043394//proteoglycan binding	K01368 cathepsin S [EC:3.4.22.27] | (RefSeq) CTSS; cathepsin S	http://www.genome.jp/dbget-bin/www_bget?hsa:1520	1.37772	8.11572e-180	3.2534e-178	UP	1.66049	3.06103e-285	2.34684e-283	UP	-0.28698	6.31205e-12	1.99752e-11	FALSE
OR6P1	0	0	0	0	0	0	0	0	0	0	0	0	0	0	0	0	0	0	chr1	158532441	158533394	OR6P1	128366	olfactory receptor 6p1	GO:0007186//G-protein coupled receptor signaling pathway; GO:0050911//detection of chemical stimulus involved in sensory perception of smell	GO:0005886//plasma membrane; GO:0016021//integral component of membrane	GO:0004930//G-protein coupled receptor activity; GO:0004984//olfactory receptor activity	K04257 olfactory receptor | (RefSeq) OR6P1; olfactory receptor family 6 subfamily P member 1	http://www.genome.jp/dbget-bin/www_bget?hsa:128366	-	-	-	-	-	-	-	-	-	-	-	-
CCDC116	3	0.0325699	9	0.110677	7	0.0791192	23	0.265458	21	0.2244	26	0.272615	7	0.0811088	10	0.116078	5	0.0534711	chr22	21987086	21991616	CCDC116	164592	coiled-coil domain-containing protein 116 isoform x1	-	GO:0005737//cytoplasm; GO:0005813//centrosome	GO:0005515//protein binding	no KO assigned | (RefSeq) CCDC116; coiled-coil domain containing 116	http://www.genome.jp/dbget-bin/www_bget?hsa:164592	1.66155	7.35588e-05	0.000148638	UP	0.244099	0.802608	0.85013	FALSE	1.41003	0.000518418	0.000959382	UP
CADPS2	38	0.137952	23	0.0945784	27	0.102046	195	0.752576	260	0.92902	171	0.599543	168	0.650919	176	0.683144	139	0.497064	chr7	121958478	122526813	CADPS2	93664	ca++-dependent secretion activator 2 isoform partial	GO:0009267//cellular response to starvation; GO:0015031//protein transport; GO:0016082//synaptic vesicle priming; GO:0045921//positive regulation of exocytosis; GO:1990504//dense core granule exocytosis	GO:0005654//nucleoplasm; GO:0005829//cytosol; GO:0030054//cell junction; GO:0030659//cytoplasmic vesicle membrane; GO:0042734//presynaptic membrane; GO:0045211//postsynaptic membrane	GO:0008289//lipid binding; GO:0046872//metal ion binding	K19933 calcium-dependent secretion activator | (RefSeq) CADPS2, CAPS2; calcium dependent secretion a	http://www.genome.jp/dbget-bin/www_bget?hsa:93664	2.63552	3.39225e-30	1.9809e-29	UP	2.50406	3.81852e-30	2.21354e-29	UP	0.126696	0.503692	0.570784	FALSE
CCDC114	12	0.0814046	10	0.0768401	12	0.0847495	15	0.108176	9	0.0600922	19	0.124481	0	0	2	0.0145062	0	0	chr19	48799709	48823332	CCDC114	93233	coiled-coil domain-containing protein 114 isoform x2	GO:0003341//cilium movement; GO:0036158//outer dynein arm assembly	GO:0036157//outer dynein arm	GO:0005515//protein binding	K23732 | (RefSeq) CCDC114, CILD20; coiled-coil domain containing 114	http://www.genome.jp/dbget-bin/www_bget?hsa:93233	0.14221	0.778916	0.819358	FALSE	-3.81353	5.17051e-07	1.25469e-06	DOWN	3.96577	1.35871e-06	3.15695e-06	UP
CCDC115	843	9.45284	642	8.15436	678	7.91503	682	8.13001	742	8.1893	664	7.1909	435	5.20593	401	4.80767	490	5.41233	chr2	131095506	131100254	CCDC115	84317	coiled-coil domain-containing protein 115	-	GO:0005764//lysosome; GO:0005768//endosome; GO:0005793//endoplasmic reticulum-Golgi intermediate compartment; GO:0016020//membrane; GO:0030137//COPI-coated vesicle	-	K23543 coiled-coil domain-containing protein 115 | (RefSeq) CCDC115, CDG2O, ccp1; coiled-coil domain	http://www.genome.jp/dbget-bin/www_bget?hsa:84317	-0.242371	0.00704336	0.011557	FALSE	-0.660883	4.24155e-13	1.41985e-12	FALSE	0.414657	3.78966e-06	8.50971e-06	FALSE
CCDC112	224	1.94242	230	2.25914	205	1.85071	179	1.65014	157	1.33999	210	1.75871	135	1.24941	130	1.2053	82	0.700427	chr5	114602885	114632458	CCDC112	153733	coiled-coil domain-containing protein 112 isoform x1	-	-	GO:0005515//protein binding	no KO assigned | (RefSeq) CCDC112, MBC1; coiled-coil domain containing 112	http://www.genome.jp/dbget-bin/www_bget?hsa:153733	-0.471018	0.000976728	0.00177004	FALSE	-0.876901	1.29343e-05	2.83329e-05	FALSE	0.400555	0.0584595	0.0825888	FALSE
USP17L30	0	0	0	0	0	0	0	0	0	0	0	0	0	0	0	0	0	0	chr4	9364855	9366447	USP17L30	728419	deubiquitinating enzyme 3	GO:0006511//ubiquitin-dependent protein catabolic process; GO:0007093//mitotic cell cycle checkpoint; GO:0010955//negative regulation of protein processing; GO:0030334//regulation of cell migration; GO:0031064//negative regulation of histone deacetylation; GO:0034260//negative regulation of GTPase activity; GO:0042127//regulation of cell proliferation; GO:0042981//regulation of apoptotic process;…	GO:0005730//nucleolus; GO:0005789//endoplasmic reticulum membrane	GO:0004843//ubiquitin-specific protease activity; GO:0005515//protein binding	K11845 ubiquitin carboxyl-terminal hydrolase 17 [EC:3.4.19.12] | (RefSeq) USP17L30; ubiquitin specif	http://www.genome.jp/dbget-bin/www_bget?hsa:728419	-	-	-	-	-	-	-	-	-	-	-	-
CCDC110	0	0	0	0	3	0.023997	0	0	0	0	3	0.0222612	2	0.0164003	0	0	0	0	chr4	186366336	186392913	CCDC110	256309	coiled-coil domain-containing protein 110 isoform x4	-	GO:0005730//nucleolus; GO:0005794//Golgi apparatus	GO:0005515//protein binding	no KO assigned | (RefSeq) CCDC110, CT52, KM-HN-1, KMHN1; coiled-coil domain containing 110	http://www.genome.jp/dbget-bin/www_bget?hsa:256309	-0.178653	1	1	FALSE	-0.464913	1	1	FALSE	0.286048	1	1	FALSE
MEI4	0	0	1	0.00484672	2	0.00890936	0	0	0	0	0	0	3	0.0137001	0	0	0	0	chr6	78359991	78636759	MEI4	101928601	meiosis-specific protein mei4-like	GO:0006310//DNA recombination; GO:0007129//synapsis; GO:0007283//spermatogenesis; GO:0042138//meiotic DNA double-strand break formation; GO:0048477//oogenesis	GO:0000800//lateral element	-	no KO assigned | (RefSeq) MEI4; meiotic double-stranded break formation protein 4	http://www.genome.jp/dbget-bin/www_bget?hsa:101928601	-3.26342	0.26681	0.327573	FALSE	0.039706	1	1	FALSE	-3.28805	0.267959	0.327887	FALSE
LEO1	2290	23.0834	2037	23.2582	2350	24.6616	1989	21.3143	2054	20.3785	2159	21.0183	1337	14.3837	1395	15.0347	1648	16.3635	chr15	52230222	52263998	LEO1	123169	rna polymerase-associated protein leo1 isoform x2	GO:0001711//endodermal cell fate commitment; GO:0006378//mRNA polyadenylation; GO:0010390//histone monoubiquitination; GO:0016055//Wnt signaling pathway; GO:0019827//stem cell population maintenance; GO:0031442//positive regulation of mRNA 3'-end processing; GO:0032968//positive regulation of transcription elongation from RNA polymerase II promoter; GO:0033523//histone H2B ubiquitination; GO:0045…	GO:0005730//nucleolus; GO:0005813//centrosome; GO:0016593//Cdc73/Paf1 complex	GO:1990269//RNA polymerase II C-terminal domain phosphoserine binding	K15177 RNA polymerase-associated protein LEO1 | (RefSeq) LEO1, RDL; LEO1 homolog, Paf1/RNA polymeras	http://www.genome.jp/dbget-bin/www_bget?hsa:123169	-0.302122	1.32915e-09	3.68248e-09	FALSE	-0.56716	2.95104e-23	1.42144e-22	FALSE	0.261057	9.57448e-06	2.08441e-05	FALSE
MTCL1	242	0.867719	234	0.950386	189	0.705527	572	2.18038	644	2.27278	622	2.15394	733	2.80506	703	2.6951	744	2.62779	chr18	8717369	8832775	MTCL1	23255	microtubule cross-linking factor 1 isoform x6	GO:0001578//microtubule bundle formation; GO:0010506//regulation of autophagy; GO:0045197//establishment or maintenance of epithelial cell apical/basal polarity; GO:0090314//positive regulation of protein targeting to membrane; GO:2000576//positive regulation of microtubule motor activity	GO:0000922//spindle pole; GO:0005615//extracellular space; GO:0005737//cytoplasm; GO:0016324//apical plasma membrane; GO:0016327//apicolateral plasma membrane; GO:0016328//lateral plasma membrane; GO:0030496//midbody; GO:0097427//microtubule bundle	GO:0008017//microtubule binding; GO:0042803//protein homodimerization activity; GO:0044822//poly(A) RNA binding	no KO assigned | (RefSeq) MTCL1, CCDC165, KIAA0802, SOGA2; microtubule crosslinking factor 1	http://www.genome.jp/dbget-bin/www_bget?hsa:23255	1.26748	2.80312e-31	1.69358e-30	UP	1.75395	1.43215e-62	1.60557e-61	UP	-0.490226	5.01901e-11	1.51686e-10	FALSE
ATP1A4	1	0.00922838	0	0	2	0.0192151	8	0.0784852	8	0.0726647	8	0.071301	3	0.0295475	5	0.0493346	0	0	chr1	160121352	160156767	ATP1A4	480	sodium potassium-transporting atpase subunit alpha-4	GO:0006883//cellular sodium ion homeostasis; GO:0007283//spermatogenesis; GO:0009566//fertilization; GO:0010107//potassium ion import; GO:0010248//establishment or maintenance of transmembrane electrochemical gradient; GO:0015991//ATP hydrolysis coupled proton transport; GO:0030007//cellular potassium ion homeostasis; GO:0030317//sperm motility; GO:0030641//regulation of cellular pH; GO:0036376//…	GO:0005890//sodium:potassium-exchanging ATPase complex; GO:0043231//intracellular membrane-bounded organelle	GO:0005391//sodium:potassium-exchanging ATPase activity; GO:0005524//ATP binding; GO:0046872//metal ion binding	K01539 sodium/potassium-transporting ATPase subunit alpha [EC:7.2.2.13] | (RefSeq) ATP1A4, ATP1A1, A	http://www.genome.jp/dbget-bin/www_bget?hsa:480	2.67192	0.000459807	0.000861604	UP	1.36584	0.275963	0.344168	FALSE	1.2982	0.0703866	0.0981371	FALSE
ATP1A3	356	2.18068	354	2.45621	404	2.57639	126	0.820512	104	0.627023	96	0.567929	97	0.634145	110	0.720428	106	0.63959	chr19	42470734	42498428	ATP1A3	478	sodium potassium-transporting atpase subunit alpha-3 isoform x2	GO:0006883//cellular sodium ion homeostasis; GO:0007613//memory; GO:0008344//adult locomotory behavior; GO:0008542//visual learning; GO:0010107//potassium ion import; GO:0010248//establishment or maintenance of transmembrane electrochemical gradient; GO:0015991//ATP hydrolysis coupled proton transport; GO:0030007//cellular potassium ion homeostasis; GO:0035235//ionotropic glutamate receptor signa…	GO:0005634//nucleus; GO:0005783//endoplasmic reticulum; GO:0005794//Golgi apparatus; GO:0005890//sodium:potassium-exchanging ATPase complex; GO:0030054//cell junction; GO:0030424//axon; GO:0042383//sarcolemma; GO:0043209//myelin sheath; GO:0044326//dendritic spine neck; GO:0044327//dendritic spine head; GO:0045211//postsynaptic membrane; GO:1903561//extracellular vesicle	GO:0004970//ionotropic glutamate receptor activity; GO:0005234//extracellular-glutamate-gated ion channel activity; GO:0005524//ATP binding; GO:0031748//D1 dopamine receptor binding; GO:0043395//heparan sulfate proteoglycan binding; GO:0046872//metal ion binding; GO:0051087//chaperone binding; GO:0086037//sodium:potassium-exchanging ATPase activity involved in regulation of cardiac muscle cell me…	K01539 sodium/potassium-transporting ATPase subunit alpha [EC:7.2.2.13] | (RefSeq) ATP1A3, AHC2, ATP	http://www.genome.jp/dbget-bin/www_bget?hsa:478	-1.96539	7.47457e-42	5.79236e-41	DOWN	-1.78882	1.65171e-41	1.2588e-40	DOWN	-0.179778	0.336392	0.402071	FALSE
ATP1A2	87	0.347802	78	0.353206	82	0.341283	7	0.0297497	8	0.0314783	2	0.00772188	25	0.106666	67	0.286381	70	0.275654	chr1	160085520	160113381	ATP1A2	477	sodium potassium-transporting atpase subunit alpha-2	GO:0002026//regulation of the force of heart contraction; GO:0002087//regulation of respiratory gaseous exchange by neurological system process; GO:0006883//cellular sodium ion homeostasis; GO:0006940//regulation of smooth muscle contraction; GO:0008217//regulation of blood pressure; GO:0008344//adult locomotory behavior; GO:0008542//visual learning; GO:0010248//establishment or maintenance of tr…	GO:0005768//endosome; GO:0005829//cytosol; GO:0005890//sodium:potassium-exchanging ATPase complex; GO:0005901//caveola; GO:0014704//intercalated disc; GO:0030315//T-tubule; GO:0043197//dendritic spine; GO:0043209//myelin sheath; GO:0043231//intracellular membrane-bounded organelle; GO:1903561//extracellular vesicle	GO:0005391//sodium:potassium-exchanging ATPase activity; GO:0005524//ATP binding; GO:0008144//drug binding; GO:0030955//potassium ion binding; GO:0031402//sodium ion binding; GO:0051087//chaperone binding; GO:1990239//steroid hormone binding	K01539 sodium/potassium-transporting ATPase subunit alpha [EC:7.2.2.13] | (RefSeq) ATP1A2, FHM2, MHP	http://www.genome.jp/dbget-bin/www_bget?hsa:477	-4.02457	1.13002e-40	8.5152e-40	DOWN	-0.571183	0.0564086	0.0827064	FALSE	-3.45135	4.26884e-12	1.35877e-11	DOWN
ATP1A1	62213	367.981	54954	368.183	60833	374.604	32750	205.934	36790	214.182	37203	212.521	38457	242.769	37522	237.294	42341	246.694	chr1	116915795	116947396	ATP1A1	476	sodium potassium-transporting atpase subunit alpha-1 isoform x1	GO:0002026//regulation of the force of heart contraction; GO:0002028//regulation of sodium ion transport; GO:0006883//cellular sodium ion homeostasis; GO:0008217//regulation of blood pressure; GO:0010248//establishment or maintenance of transmembrane electrochemical gradient; GO:0015991//ATP hydrolysis coupled proton transport; GO:0016311//dephosphorylation; GO:0030007//cellular potassium ion hom…	GO:0005768//endosome; GO:0005783//endoplasmic reticulum; GO:0005794//Golgi apparatus; GO:0005890//sodium:potassium-exchanging ATPase complex; GO:0005901//caveola; GO:0014704//intercalated disc; GO:0016323//basolateral plasma membrane; GO:0016324//apical plasma membrane; GO:0030315//T-tubule; GO:0042470//melanosome; GO:0043209//myelin sheath; GO:0043234//protein complex; GO:0070062//extracellular …	GO:0005391//sodium:potassium-exchanging ATPase activity; GO:0005524//ATP binding; GO:0016791//phosphatase activity; GO:0019901//protein kinase binding; GO:0019904//protein domain specific binding; GO:0030506//ankyrin binding; GO:0030955//potassium ion binding; GO:0031402//sodium ion binding; GO:0043531//ADP binding; GO:0043548//phosphatidylinositol 3-kinase binding; GO:0051087//chaperone binding;…	K01539 sodium/potassium-transporting ATPase subunit alpha [EC:7.2.2.13] | (RefSeq) ATP1A1, CMT2DD, H	http://www.genome.jp/dbget-bin/www_bget?hsa:476	-0.934809	2.54583e-178	1.00862e-176	FALSE	-0.54687	4.22736e-78	6.05776e-77	FALSE	-0.392019	3.06534e-31	1.88946e-30	FALSE
TMEM213	0	0	0	0	0	0	0	0	0	0	0	0	0	0	0	0	0	0	chr7	138482739	138490769	TMEM213	155006	transmembrane protein 213	-	GO:0016021//integral component of membrane	-	no KO assigned | (RefSeq) TMEM213; transmembrane protein 213	http://www.genome.jp/dbget-bin/www_bget?hsa:155006	-	-	-	-	-	-	-	-	-	-	-	-
FAM170B	0	0	0	0	0	0	0	0	0	0	0	0	0	0	0	0	0	0	chr10	50339199	50342065	FAM170B	170370	protein fam170b	GO:2000344//positive regulation of acrosome reaction	GO:0002081//outer acrosomal membrane	GO:0005515//protein binding	no KO assigned | (RefSeq) FAM170B, C10orf73; family with sequence similarity 170 member B	http://www.genome.jp/dbget-bin/www_bget?hsa:170370	-	-	-	-	-	-	-	-	-	-	-	-
MGRN1	6037	25.5067	4864	23.2781	5064	22.2749	3243	14.5664	3290	13.6816	3478	14.192	3689	16.6347	3607	16.2943	4003	16.6599	chr16	4674825	4740975	MGRN1	23295	e3 ubiquitin-protein ligase mgrn1 isoform x1	GO:0000209//protein polyubiquitination; GO:0006513//protein monoubiquitination; GO:0008333//endosome to lysosome transport; GO:0043951//negative regulation of cAMP-mediated signaling; GO:0045744//negative regulation of G-protein coupled receptor protein signaling pathway	GO:0005634//nucleus; GO:0005769//early endosome; GO:0005829//cytosol; GO:0005886//plasma membrane; GO:0070062//extracellular exosome	GO:0005515//protein binding; GO:0008270//zinc ion binding; GO:0016874//ligase activity; GO:0061630//ubiquitin protein ligase activity	K10604 E3 ubiquitin-protein ligase MGRN1 [EC:2.3.2.27] | (RefSeq) MGRN1, RNF156; mahogunin ring fing	http://www.genome.jp/dbget-bin/www_bget?hsa:23295	-0.866639	1.34971e-66	1.61364e-65	FALSE	-0.453769	2.52628e-23	1.21931e-22	FALSE	-0.416896	1.8367e-23	9.00804e-23	FALSE
NHEJ1	164	1.70345	142	1.67068	140	1.51391	425	4.69295	476	4.86631	441	4.42388	131	1.45221	94	1.04392	108	1.105	chr2	219940046	220025587	NHEJ1	79840	non-homologous end-joining factor 1	GO:0006303//double-strand break repair via nonhomologous end joining; GO:0006310//DNA recombination; GO:0007417//central nervous system development; GO:0010212//response to ionizing radiation; GO:0030183//B cell differentiation; GO:0030217//T cell differentiation; GO:0051351//positive regulation of ligase activity	GO:0005654//nucleoplasm; GO:0070419//nonhomologous end joining complex	GO:0003677//DNA binding; GO:0005515//protein binding	K10980 non-homologous end-joining factor 1 | (RefSeq) NHEJ1, XLF; non-homologous end joining factor	http://www.genome.jp/dbget-bin/www_bget?hsa:79840	1.39293	5.01735e-37	3.45597e-36	UP	-0.376426	0.0227942	0.0356718	FALSE	1.76578	3.13848e-41	2.45332e-40	UP
CRTAP	5255	17.2588	4704	17.4994	4900	16.7541	4326	15.1041	4431	14.3234	4537	14.3908	2376	8.32832	2381	8.36088	2696	8.72188	chr3	33155450	33189265	CRTAP	10491	cartilage-associated protein	GO:0007283//spermatogenesis; GO:0018400//peptidyl-proline hydroxylation to 3-hydroxy-L-proline; GO:0050821//protein stabilization; GO:0061077//chaperone-mediated protein folding; GO:1901874//negative regulation of post-translational protein modification	GO:0005578//proteinaceous extracellular matrix; GO:0005615//extracellular space; GO:0005788//endoplasmic reticulum lumen; GO:0032991//macromolecular complex	GO:0032403//protein complex binding	K19606 cartilage-associated protein | (RefSeq) CRTAP, CASP, LEPREL3, OI7, P3H5; cartilage associated	http://www.genome.jp/dbget-bin/www_bget?hsa:10491	-0.356315	4.08394e-19	1.71095e-18	FALSE	-0.953719	9.87531e-134	2.62453e-132	FALSE	0.593511	5.17211e-42	4.10531e-41	FALSE
SPHK2	381	3.01646	334	2.99529	318	2.62112	869	7.31415	1071	8.34583	968	7.40163	346	2.92363	367	3.10666	416	3.24428	chr19	49122548	49133663	SPHK2	56848	sphingosine kinase 2 isoform x2	GO:0001568//blood vessel development; GO:0003376//sphingosine-1-phosphate signaling pathway; GO:0006669//sphinganine-1-phosphate biosynthetic process; GO:0007420//brain development; GO:0007565//female pregnancy; GO:0008284//positive regulation of cell proliferation; GO:0043066//negative regulation of apoptotic process; GO:0046512//sphingosine biosynthetic process; GO:0046834//lipid phosphorylation	GO:0005765//lysosomal membrane; GO:0005829//cytosol	GO:0005524//ATP binding; GO:0008481//sphinganine kinase activity; GO:0017016//Ras GTPase binding; GO:0017050//D-erythro-sphingosine kinase activity; GO:0038036//sphingosine-1-phosphate receptor activity	K04718 sphingosine kinase [EC:2.7.1.91] | (RefSeq) SPHK2, SK_2, SK-2, SPK_2, SPK-2; sphingosine kina	http://www.genome.jp/dbget-bin/www_bget?hsa:56848	1.29535	4.09647e-47	3.55385e-46	UP	0.169705	0.0978281	0.136851	FALSE	1.12157	3.61432e-38	2.62711e-37	UP
SPHK1	12774	144.276	11068	141.598	11681	137.352	15891	190.805	16187	179.946	15522	169.315	9585	115.54	9105	109.952	10793	120.078	chr17	74380690	74383941	SPHK1	8877	sphingosine kinase 1 isoform x1	GO:0001956//positive regulation of neurotransmitter secretion; GO:0003376//sphingosine-1-phosphate signaling pathway; GO:0006457//protein folding; GO:0006954//inflammatory response; GO:0007420//brain development; GO:0007565//female pregnancy; GO:0009267//cellular response to starvation; GO:0010800//positive regulation of peptidyl-threonine phosphorylation; GO:0010803//regulation of tumor necrosis…	GO:0005634//nucleus; GO:0005829//cytosol; GO:0005886//plasma membrane; GO:0008021//synaptic vesicle; GO:0030424//axon	GO:0000287//magnesium ion binding; GO:0003677//DNA binding; GO:0005516//calmodulin binding; GO:0005524//ATP binding; GO:0008481//sphinganine kinase activity; GO:0017050//D-erythro-sphingosine kinase activity; GO:0038036//sphingosine-1-phosphate receptor activity; GO:0051721//protein phosphatase 2A binding	K04718 sphingosine kinase [EC:2.7.1.91] | (RefSeq) SPHK1, SPHK; sphingosine kinase 1	http://www.genome.jp/dbget-bin/www_bget?hsa:8877	0.228774	2.19662e-07	5.3086e-07	FALSE	-0.227119	1.68929e-09	4.77242e-09	FALSE	0.452024	2.07493e-21	9.48905e-21	FALSE
DPT	1	0.012641	0	0	0	0	0	0	0	0	0	0	0	0	0	0	0	0	chr1	168664695	168698442	DPT	1805	dermatopontin	GO:0007155//cell adhesion; GO:0008285//negative regulation of cell proliferation; GO:0030199//collagen fibril organization	GO:0005578//proteinaceous extracellular matrix; GO:0005615//extracellular space; GO:0070062//extracellular exosome	-	no KO assigned | (RefSeq) DPT, TRAMP; dermatopontin	http://www.genome.jp/dbget-bin/www_bget?hsa:1805	-	-	-	-	-	-	-	-	-	-	-	-
IPO11	1441	7.12301	1192	6.67415	1457	7.49804	1335	7.01541	1447	7.04006	1488	7.10367	847	4.46845	864	4.56635	929	4.52344	chr5	61708573	61924416	IPO11	51194	importin-11 isoform x1	GO:0006610//ribosomal protein import into nucleus; GO:0042991//transcription factor import into nucleus	GO:0005635//nuclear envelope; GO:0005829//cytosol; GO:0016021//integral component of membrane	GO:0008536//Ran GTPase binding; GO:0008565//protein transporter activity	no KO assigned | (RefSeq) IPO11, RanBP11; importin 11	http://www.genome.jp/dbget-bin/www_bget?hsa:51194	-0.132486	0.0254978	0.0384788	FALSE	-0.586593	6.07326e-21	2.71105e-20	FALSE	0.450153	5.84586e-14	2.02002e-13	FALSE
CUEDC2	928	16.9489	772	15.9709	767	14.584	866	16.8144	885	15.909	869	15.3283	824	16.0618	921	17.9849	941	16.9292	chr10	104183002	104192423	CUEDC2	79004	cue domain-containing protein 2	GO:0010936//negative regulation of macrophage cytokine production; GO:1900016//negative regulation of cytokine production involved in inflammatory response	GO:0005654//nucleoplasm; GO:0005737//cytoplasm; GO:0031965//nuclear membrane	GO:0005515//protein binding	no KO assigned | (RefSeq) CUEDC2, C10orf66, bA18I14.5; CUE domain containing 2	http://www.genome.jp/dbget-bin/www_bget?hsa:79004	-0.107003	0.163917	0.211417	FALSE	0.166878	0.0280074	0.0431364	FALSE	-0.277814	0.000142968	0.00028091	FALSE
CBLB	2278	7.57838	1903	7.17104	2162	7.48802	4279	15.1334	4639	15.1899	4686	15.0559	3679	13.0625	3523	12.5312	3931	12.8819	chr3	105374305	105588266	CBLB	868	e3 ubiquitin-protein ligase cbl-b isoform x1	GO:0000209//protein polyubiquitination; GO:0006607//NLS-bearing protein import into nucleus; GO:0007166//cell surface receptor signaling pathway; GO:0009629//response to gravity; GO:0009725//response to hormone; GO:0023051//regulation of signaling	GO:0005654//nucleoplasm; GO:0005829//cytosol; GO:0005886//plasma membrane; GO:0045121//membrane raft	GO:0001784//phosphotyrosine binding; GO:0004842//ubiquitin-protein transferase activity; GO:0004871//signal transducer activity; GO:0005509//calcium ion binding; GO:0008270//zinc ion binding; GO:0016874//ligase activity; GO:0019901//protein kinase binding	K22517 E3 ubiquitin-protein ligase CBL-B [EC:2.3.2.27] | (RefSeq) CBLB, Cbl-b, Nbla00127, RNF56; Cbl	http://www.genome.jp/dbget-bin/www_bget?hsa:868	0.905772	4.51147e-107	9.19524e-106	FALSE	0.855695	3.90547e-100	7.10113e-99	FALSE	0.0460883	0.240478	0.298559	FALSE
AIM1	1345	3.89547	1070	3.51028	1224	3.69068	756	2.32772	783	2.23207	847	2.3692	344	1.06333	336	1.04048	326	0.930054	chr6	106959730	107018324	AIM1	202	absent in melanoma 1 protein	-	-	GO:0030246//carbohydrate binding	no KO assigned | (RefSeq) CRYBG1, AIM1, ST4; crystallin beta-gamma domain containing 1	http://www.genome.jp/dbget-bin/www_bget?hsa:202	-0.802748	2.64068e-34	1.71487e-33	FALSE	-1.80739	2.30717e-123	5.53089e-122	DOWN	1.00071	8.45466e-32	5.29788e-31	UP
CPEB4	4877	14.3072	3963	13.1688	4722	14.4217	6005	18.7278	7146	20.6334	7325	20.7534	4742	14.8469	4519	14.1742	4772	13.7897	chr5	173315331	173387994	CPEB4	80315	cytoplasmic polyadenylation element-binding protein 4 isoform x1	GO:0002931//response to ischemia; GO:0035235//ionotropic glutamate receptor signaling pathway; GO:0036294//cellular response to decreased oxygen levels; GO:0042149//cellular response to glucose starvation; GO:0043524//negative regulation of neuron apoptotic process; GO:0071230//cellular response to amino acid stimulus; GO:2000766//negative regulation of cytoplasmic translation	GO:0005634//nucleus; GO:0005783//endoplasmic reticulum; GO:0014069//postsynaptic density; GO:0030425//dendrite; GO:1990124//messenger ribonucleoprotein complex	GO:0000166//nucleotide binding; GO:0000900//translation repressor activity, nucleic acid binding; GO:0003730//mRNA 3'-UTR binding; GO:0005515//protein binding; GO:0008135//translation factor activity, RNA binding; GO:0043022//ribosome binding	K02602 cytoplasmic polyadenylation element-binding protein | (RefSeq) CPEB4, CPE-BP4, hCPEB-4; cytop	http://www.genome.jp/dbget-bin/www_bget?hsa:80315	0.398206	7.40005e-16	2.72738e-15	FALSE	0.0958218	0.0240632	0.0374674	FALSE	0.298212	8.13713e-10	2.30855e-09	FALSE
C11orf98	18	0.603044	9	0.341538	12	0.418548	33	1.17534	28	0.923298	20	0.647122	12	0.429073	19	0.68059	15	0.495018	chr11	62430289	62432688	C11orf98	102288414	---	-	-	-	no KO assigned | (RefSeq) C11orf98, C11orf48; chromosome 11 open reading frame 98	http://www.genome.jp/dbget-bin/www_bget?hsa:102288414	0.864938	0.021439	0.032825	FALSE	0.28615	0.485081	0.567331	FALSE	0.574836	0.107606	0.14466	FALSE
CPEB1	177	1.2239	161	1.26101	191	1.37498	221	1.62457	253	1.72188	217	1.44915	61	0.450172	91	0.672777	99	0.674315	chr15	83211951	83316767	CPEB1	64506	cytoplasmic polyadenylation element-binding protein 1 isoform x2	GO:0006397//mRNA processing; GO:0008285//negative regulation of cell proliferation; GO:0010976//positive regulation of neuron projection development; GO:0030335//positive regulation of cell migration; GO:0032869//cellular response to insulin stimulus; GO:0045727//positive regulation of translation; GO:0051028//mRNA transport; GO:0051770//positive regulation of nitric-oxide synthase biosynthetic p…	GO:0000932//cytoplasmic mRNA processing body; GO:0005654//nucleoplasm; GO:0005813//centrosome; GO:0014069//postsynaptic density; GO:0030054//cell junction; GO:0030425//dendrite; GO:0030426//growth cone; GO:0043025//neuronal cell body; GO:0045211//postsynaptic membrane; GO:0048471//perinuclear region of cytoplasm; GO:1990124//messenger ribonucleoprotein complex	GO:0000166//nucleotide binding; GO:0000900//translation repressor activity, nucleic acid binding; GO:0008135//translation factor activity, RNA binding; GO:0035925//mRNA 3'-UTR AU-rich region binding; GO:0043022//ribosome binding; GO:0046872//metal ion binding	K02602 cytoplasmic polyadenylation element-binding protein | (RefSeq) CPEB1, CPE-BP1, CPEB, CPEB-1,	http://www.genome.jp/dbget-bin/www_bget?hsa:64506	0.189886	0.130901	0.174476	FALSE	-1.03409	2.27197e-09	6.38061e-09	DOWN	1.22014	4.32733e-13	1.4442e-12	UP
ZNF45	718	4.01837	651	4.12692	665	3.87467	871	5.18222	904	4.97968	1055	5.7024	783	4.67693	655	3.91942	779	4.29453	chr19	44416776	44439411	ZNF45	7596	zinc finger protein 45 isoform x1	GO:0006355//regulation of transcription, DNA-templated; GO:0006367//transcription initiation from RNA polymerase II promoter; GO:0007275//multicellular organismal development	GO:0005654//nucleoplasm	GO:0003677//DNA binding; GO:0003700//transcription factor activity, sequence-specific DNA binding; GO:0046872//metal ion binding	K09228 KRAB domain-containing zinc finger protein | (RefSeq) ZNF45, KOX5, ZNF13; zinc finger protein	http://www.genome.jp/dbget-bin/www_bget?hsa:7596	0.278356	0.000237213	0.000456793	FALSE	0.166405	0.0398431	0.0601187	FALSE	0.107742	0.199564	0.25241	FALSE
TERF2IP	6334	63.5541	5577	63.385	5832	60.9216	5359	57.1638	5866	57.9316	5852	56.7087	6062	64.9165	6094	65.3768	6439	63.641	chr16	75681635	75691340	TERF2IP	54386	telomeric repeat-binding factor 2-interacting protein 1	GO:0007004//telomere maintenance via telomerase; GO:0010569//regulation of double-strand break repair via homologous recombination; GO:0031848//protection from non-homologous end joining at telomere; GO:0032205//negative regulation of telomere maintenance; GO:0033138//positive regulation of peptidyl-serine phosphorylation; GO:0043123//positive regulation of I-kappaB kinase/NF-kappaB signaling; GO…	GO:0005635//nuclear envelope; GO:0005654//nucleoplasm; GO:0005737//cytoplasm; GO:0030870//Mre11 complex; GO:0070187//telosome	GO:0005515//protein binding; GO:0098505//G-rich strand telomeric DNA binding	K11113 telomeric repeat-binding factor 2-interacting protein 1 | (RefSeq) TERF2IP, DRIP5, RAP1; TERF	http://www.genome.jp/dbget-bin/www_bget?hsa:54386	-0.251576	1.3153e-11	4.04708e-11	FALSE	0.111067	0.00112933	0.00208555	FALSE	-0.366662	4.53519e-23	2.19763e-22	FALSE
CPEB2	8596	27.5764	7860	28.5616	8872	29.6313	10433	35.5813	11501	36.3148	12356	38.2823	9189	31.4617	8869	30.4208	9383	29.6507	chr4	15004298	15071777	CPEB2	132864	cytoplasmic polyadenylation element-binding protein 2 isoform x1	GO:0032869//cellular response to insulin stimulus; GO:0034260//negative regulation of GTPase activity; GO:0034599//cellular response to oxidative stress; GO:0071243//cellular response to arsenic-containing substance; GO:0071456//cellular response to hypoxia; GO:1900248//negative regulation of cytoplasmic translational elongation	GO:0005634//nucleus; GO:0005737//cytoplasm; GO:0043005//neuron projection; GO:0045202//synapse; GO:1990124//messenger ribonucleoprotein complex	GO:0000166//nucleotide binding; GO:0000900//translation repressor activity, nucleic acid binding; GO:0005095//GTPase inhibitor activity; GO:0008135//translation factor activity, RNA binding; GO:0035925//mRNA 3'-UTR AU-rich region binding; GO:0043022//ribosome binding; GO:0043023//ribosomal large subunit binding; GO:0043024//ribosomal small subunit binding	K02602 cytoplasmic polyadenylation element-binding protein | (RefSeq) CPEB2, CPE-BP2, CPEB-2, hCPEB-	http://www.genome.jp/dbget-bin/www_bget?hsa:132864	0.238686	1.16013e-08	3.03855e-08	FALSE	0.158846	3.37771e-05	7.15951e-05	FALSE	0.0757047	0.0581519	0.0821953	FALSE
RBMXL1	700	3.03564	642	3.1536	769	3.47189	619	2.85374	779	3.32504	742	3.10768	878	4.06369	1032	4.78506	992	4.23757	chr1	89445139	89458643	RBMXL1	494115	rna binding motif x-linked-like-1	GO:0000381//regulation of alternative mRNA splicing, via spliceosome; GO:0001649//osteoblast differentiation; GO:0006376//mRNA splice site selection; GO:0006509//membrane protein ectodomain proteolysis; GO:0045944//positive regulation of transcription from RNA polymerase II promoter; GO:0071347//cellular response to interleukin-1	GO:0005615//extracellular space; GO:0005719//nuclear euchromatin; GO:0016020//membrane; GO:0044530//supraspliceosomal complex; GO:0070062//extracellular exosome; GO:0071013//catalytic step 2 spliceosome	GO:0000166//nucleotide binding; GO:0001047//core promoter binding; GO:0003682//chromatin binding; GO:0003727//single-stranded RNA binding; GO:0003729//mRNA binding	K12885 heterogeneous nuclear ribonucleoprotein G | (RefSeq) RBMXL1, RBM1; RBMX like 1	http://www.genome.jp/dbget-bin/www_bget?hsa:494115	-0.178801	0.036689	0.0541171	FALSE	0.502759	1.13524e-09	3.23907e-09	FALSE	-0.685727	9.1497e-16	3.43852e-15	FALSE
RBMXL3	0	0	0	0	0	0	0	0	0	0	0	0	0	0	0	0	0	0	chrX	114423963	114427431	RBMXL3	139804	rna-binding motif x-linked-like-3	-	-	GO:0000166//nucleotide binding; GO:0003723//RNA binding	K12885 heterogeneous nuclear ribonucleoprotein G | (RefSeq) RBMXL3, CXorf55; RBMX like 3	http://www.genome.jp/dbget-bin/www_bget?hsa:139804	-	-	-	-	-	-	-	-	-	-	-	-
ZNF44	152	1.21888	105	0.953732	134	1.11869	215	1.83285	239	1.88635	238	1.84321	205	1.75446	210	1.80049	241	1.90365	chr19	12382623	12405714	ZNF44	51710	zinc finger protein 44 isoform x1	GO:0006355//regulation of transcription, DNA-templated	GO:0005634//nucleus	GO:0003677//DNA binding; GO:0046872//metal ion binding	K09228 KRAB domain-containing zinc finger protein | (RefSeq) ZNF44, GIOT-2, KOX7, ZNF, ZNF504, ZNF55	http://www.genome.jp/dbget-bin/www_bget?hsa:51710	0.630272	1.3665e-06	3.12985e-06	FALSE	0.791873	5.7114e-09	1.56541e-08	FALSE	-0.165389	0.146539	0.19017	FALSE
ABAT	501	2.14455	432	2.09461	447	1.99202	262	1.19226	264	1.11227	328	1.35598	523	2.38932	542	2.48058	620	2.61423	chr16	8768444	8878432	ABAT	18	4-aminobutyrate mitochondrial isoform x2	GO:0001666//response to hypoxia; GO:0007568//aging; GO:0007620//copulation; GO:0007626//locomotory behavior; GO:0009449//gamma-aminobutyric acid biosynthetic process; GO:0009450//gamma-aminobutyric acid catabolic process; GO:0010039//response to iron ion; GO:0014053//negative regulation of gamma-aminobutyric acid secretion; GO:0021549//cerebellum development; GO:0031652//positive regulation of he…	GO:0005759//mitochondrial matrix; GO:0032144//4-aminobutyrate transaminase complex; GO:0043005//neuron projection; GO:0070062//extracellular exosome	GO:0003867//4-aminobutyrate transaminase activity; GO:0030170//pyridoxal phosphate binding; GO:0032145//succinate-semialdehyde dehydrogenase binding; GO:0042803//protein homodimerization activity; GO:0046872//metal ion binding; GO:0047298//(S)-3-amino-2-methylpropionate transaminase activity; GO:0051536//iron-sulfur cluster binding	K13524 4-aminobutyrate aminotransferase / (S)-3-amino-2-methylpropionate transaminase [EC:2.6.1.19 2	http://www.genome.jp/dbget-bin/www_bget?hsa:18	-0.889126	2.5259e-18	1.02718e-17	FALSE	0.330184	7.91352e-05	0.00016244	FALSE	-1.22317	4.35004e-34	2.86307e-33	DOWN
TMEM210	0	0	0	0	0	0	3	0.136599	2	0.0843124	0	0	0	0	0	0	0	0	chr9	140065380	140066498	TMEM210	100505993	transmembrane protein 210	GO:0042787//protein ubiquitination involved in ubiquitin-dependent protein catabolic process	GO:0005680//anaphase-promoting complex; GO:0016021//integral component of membrane	GO:0031625//ubiquitin protein ligase binding; GO:0061630//ubiquitin protein ligase activity	no KO assigned | (RefSeq) TMEM210; transmembrane protein 210	http://www.genome.jp/dbget-bin/www_bget?hsa:100505993	3.76087	0.0769594	0.106558	FALSE	-	-	-	-	3.7413	0.0779789	0.107441	FALSE
FAM170A	2	0.0334768	0	0	0	0	2	0.035589	4	0.0658994	0	0	0	0	0	0	0	0	chr5	118965254	118971517	FAM170A	340069	protein fam170a isoform x1	GO:0006366//transcription from RNA polymerase II promoter; GO:0045893//positive regulation of transcription, DNA-templated	GO:0005634//nucleus	GO:0003677//DNA binding; GO:0046872//metal ion binding	no KO assigned | (RefSeq) FAM170A, ZNFD; family with sequence similarity 170 member A	http://www.genome.jp/dbget-bin/www_bget?hsa:340069	1.25911	0.330859	0.39696	FALSE	-2.63844	0.510174	0.576575	FALSE	3.98108	0.0432495	0.0624985	FALSE
ZNF780B	642	1.6186	524	1.49643	609	1.59849	523	1.40178	593	1.47153	635	1.54618	539	1.45033	620	1.67129	605	1.5025	chr19	40534167	40562115	ZNF780B	163131	zinc finger protein 780b isoform x2	GO:0006355//regulation of transcription, DNA-templated	GO:0005634//nucleus	GO:0003677//DNA binding; GO:0003700//transcription factor activity, sequence-specific DNA binding; GO:0046872//metal ion binding	K09228 KRAB domain-containing zinc finger protein | (RefSeq) ZNF780B, ZNF779; zinc finger protein 78	http://www.genome.jp/dbget-bin/www_bget?hsa:163131	-0.21552	0.00754017	0.0123282	FALSE	0.0366548	0.660811	0.723028	FALSE	-0.256261	0.00326173	0.00552971	FALSE
VCPIP1	3761	10.0482	3202	9.69001	3731	10.3776	5393	15.3174	6149	16.1695	6409	16.5369	3372	9.6149	3402	9.71791	3563	9.37674	chr8	67542488	67579452	VCPIP1	80124	deubiquitinating protein vcip135	GO:0007067//mitotic nuclear division; GO:0016320//endoplasmic reticulum membrane fusion; GO:0016567//protein ubiquitination; GO:0035871//protein K11-linked deubiquitination; GO:0071108//protein K48-linked deubiquitination; GO:0090168//Golgi reassembly	GO:0005783//endoplasmic reticulum; GO:0005795//Golgi stack	GO:0004843//ubiquitin-specific protease activity	K11861 deubiquitinating protein VCIP135 [EC:3.4.19.12] | (RefSeq) VCPIP1, DUBA3, VCIP135; valosin co	http://www.genome.jp/dbget-bin/www_bget?hsa:80124	0.550553	7.53924e-37	5.15735e-36	FALSE	-0.00423406	0.921705	0.955533	FALSE	0.550645	7.95938e-38	5.72173e-37	FALSE
NSRP1	2715	24.0297	2578	25.8453	2835	26.1228	1612	15.1676	1948	16.9698	2007	17.1556	2056	19.4212	2154	20.3836	1991	17.3581	chr17	28443825	28513493	NSRP1	84081	nuclear speckle splicing regulatory protein 1 isoform x1	GO:0000381//regulation of alternative mRNA splicing, via spliceosome; GO:0006913//nucleocytoplasmic transport; GO:0032502//developmental process	GO:0016607//nuclear speck; GO:0030529//ribonucleoprotein complex	GO:0003729//mRNA binding; GO:0005515//protein binding	K13206 coiled-coil domain-containing protein 55 | (RefSeq) NSRP1, CCDC55, HSPC095, NSrp70; nuclear s	http://www.genome.jp/dbget-bin/www_bget?hsa:84081	-0.746335	1.19378e-36	8.12029e-36	FALSE	-0.346197	1.21721e-08	3.27153e-08	FALSE	-0.404654	3.98409e-09	1.08398e-08	FALSE
FRG1	2261	47.3522	2079	49.319	2152	46.9213	1885	41.9685	1994	41.1029	2054	41.5451	1922	42.9603	1939	43.4183	2131	43.9619	chr4	190861974	190884359	FRG1	2483	protein frg1	GO:0000398//mRNA splicing, via spliceosome; GO:0006364//rRNA processing; GO:0007517//muscle organ development	GO:0005730//nucleolus; GO:0015030//Cajal body; GO:0030018//Z disc; GO:0055120//striated muscle dense body; GO:0071013//catalytic step 2 spliceosome	GO:0044822//poly(A) RNA binding; GO:0051015//actin filament binding	K13122 protein FRG1 | (RefSeq) FRG1, FRG1A, FSG1; FSHD region gene 1	http://www.genome.jp/dbget-bin/www_bget?hsa:2483	-0.32694	1.34843e-11	4.14752e-11	FALSE	-0.0739242	0.107292	0.148851	FALSE	-0.257008	8.75111e-08	2.2006e-07	FALSE
FRG2	0	0	0	0	2	0.0218036	4	0.0445289	5	0.0515332	3	0.0303397	0	0	0	0	0	0	chr4	190945522	190948412	FRG2	448831	protein frg2-like-2	-	GO:0005634//nucleus	-	no KO assigned | (RefSeq) FRG2, FRG2A; FSHD region gene 2	http://www.genome.jp/dbget-bin/www_bget?hsa:448831	2.2069	0.0435868	0.0631246	FALSE	-2.64378	0.510174	0.576575	FALSE	4.93336	0.00272536	0.00466553	UP
RHEBL1	39	0.679888	50	0.987331	52	0.943766	63	1.16758	63	1.08099	64	1.07754	13	0.241875	18	0.335506	22	0.377788	chr12	49458459	49463808	RHEBL1	121268	gtpase 1	GO:0007264//small GTPase mediated signal transduction; GO:0031929//TOR signaling; GO:0051092//positive regulation of NF-kappaB transcription factor activity	GO:0005737//cytoplasm; GO:0012505//endomembrane system; GO:0016021//integral component of membrane	GO:0005515//protein binding; GO:0005525//GTP binding; GO:0046872//metal ion binding	K07849 Ras homolog enriched in brain like 1 | (RefSeq) RHEBL1, RHEBL1c; RHEB like 1	http://www.genome.jp/dbget-bin/www_bget?hsa:121268	0.230366	0.307785	0.372846	FALSE	-1.37073	4.13552e-06	9.3903e-06	DOWN	1.5949	4.57455e-10	1.31251e-09	UP
C2CD5	1343	6.34702	1181	6.32214	1320	6.49465	853	4.28563	985	4.58182	1026	4.68297	887	4.47395	857	4.33042	908	4.22701	chr12	22601480	22697480	C2CD5	9847	c2 domain-containing protein 5 isoform x15	GO:0031340//positive regulation of vesicle fusion; GO:0038028//insulin receptor signaling pathway via phosphatidylinositol 3-kinase; GO:0065002//intracellular protein transmembrane transport; GO:0072659//protein localization to plasma membrane; GO:0090314//positive regulation of protein targeting to membrane; GO:2001275//positive regulation of glucose import in response to insulin stimulus	GO:0005815//microtubule organizing center; GO:0005938//cell cortex; GO:0030659//cytoplasmic vesicle membrane; GO:0032587//ruffle membrane	GO:0005509//calcium ion binding; GO:0005544//calcium-dependent phospholipid binding	no KO assigned | (RefSeq) C2CD5, CDP138, KIAA0528; C2 calcium dependent domain containing 5	http://www.genome.jp/dbget-bin/www_bget?hsa:9847	-0.621875	2.42712e-24	1.20233e-23	FALSE	-0.491602	6.26833e-17	2.44116e-16	FALSE	-0.134526	0.0479496	0.0688165	FALSE
IFT80	486	2.45116	433	2.47368	524	2.75141	183	0.981203	170	0.843903	181	0.881646	509	2.73985	480	2.58841	474	2.35487	chr3	159974774	160117320	IFT80	57560	intraflagellar transport protein 80 homolog isoform x1	GO:0001649//osteoblast differentiation; GO:0002062//chondrocyte differentiation; GO:0016567//protein ubiquitination; GO:0043124//negative regulation of I-kappaB kinase/NF-kappaB signaling; GO:0045087//innate immune response; GO:0045880//positive regulation of smoothened signaling pathway; GO:0046597//negative regulation of viral entry into host cell; GO:0050680//negative regulation of epithelial …	GO:0005783//endoplasmic reticulum; GO:0005813//centrosome; GO:0016021//integral component of membrane; GO:0030992//intraciliary transport particle B; GO:0031514//motile cilium; GO:0097542//ciliary tip	GO:0008270//zinc ion binding; GO:0061630//ubiquitin protein ligase activity	K19678 intraflagellar transport protein 80 | (RefSeq) IFT80, ATD2, SRTD2, WDR56; intraflagellar tran	http://www.genome.jp/dbget-bin/www_bget?hsa:57560	-1.62788	8.68293e-51	8.0005e-50	DOWN	0.0653044	0.487211	0.569623	FALSE	-1.69729	2.46331e-52	2.36907e-51	DOWN
IFT81	453	3.79852	367	3.4858	510	4.4522	205	1.82744	274	2.26139	285	2.30803	532	4.76104	526	4.71582	469	3.87384	chr12	110562140	110656600	IFT81	28981	intraflagellar transport protein 81 homolog isoform x1	GO:0007283//spermatogenesis; GO:0035735//intraciliary transport involved in cilium morphogenesis	GO:0005813//centrosome; GO:0030992//intraciliary transport particle B; GO:0036064//ciliary basal body; GO:0097225//sperm midpiece; GO:0097228//sperm principal piece; GO:0097542//ciliary tip	GO:0015631//tubulin binding	K19677 intraflagellar transport protein 81 | (RefSeq) IFT81, CDV-1, CDV-1R, CDV1, CDV1R, DV1, SRTD19	http://www.genome.jp/dbget-bin/www_bget?hsa:28981	-0.996522	3.98199e-15	1.42327e-14	FALSE	0.249284	0.0291588	0.0448061	FALSE	-1.24995	2.08996e-24	1.05579e-23	DOWN
CCDC150	3	0.0177831	1	0.00671439	13	0.0802265	30	0.189051	33	0.192534	28	0.160297	24	0.151835	19	0.120419	18	0.105102	chr2	197504356	197597530	CCDC150	284992	coiled-coil domain-containing protein 150 isoform x1	-	-	GO:0005515//protein binding	no KO assigned | (RefSeq) CCDC150; coiled-coil domain containing 150	http://www.genome.jp/dbget-bin/www_bget?hsa:284992	2.20964	5.11636e-06	1.12671e-05	UP	1.8761	0.000790694	0.00148273	UP	0.331287	0.291085	0.353336	FALSE
IFT88	271	1.78894	203	1.5179	178	1.22331	275	1.92989	286	1.85824	308	1.96362	237	1.66974	269	1.89861	250	1.62562	chr13	21140955	21265576	IFT88	8100	intraflagellar transport protein 88 homolog isoform x1	GO:1902017//regulation of cilium assembly; GO:2000785//regulation of autophagosome assembly	GO:0005814//centriole; GO:0030992//intraciliary transport particle B; GO:0031514//motile cilium; GO:0036064//ciliary basal body; GO:0097542//ciliary tip	GO:0005515//protein binding	K16474 intraflagellar transport protein 88 | (RefSeq) IFT88, D13S1056E, DAF19, TG737, TTC10, hTg737;	http://www.genome.jp/dbget-bin/www_bget?hsa:8100	0.220735	0.112088	0.150947	FALSE	0.261377	0.078599	0.112024	FALSE	-0.0438075	0.698107	0.749439	FALSE
C2orf74	467	11.8892	431	12.4289	533	14.1271	225	6.08963	308	7.71783	227	5.58139	307	8.34159	331	9.0099	292	7.32272	chr2	61372203	61391964	C2orf74	339804	uncharacterized protein c2orf74 homolog isoform x2	-	GO:0016021//integral component of membrane	-	no KO assigned | (RefSeq) C2orf74; chromosome 2 open reading frame 74	http://www.genome.jp/dbget-bin/www_bget?hsa:339804	-1.10944	1.22925e-17	4.86892e-17	DOWN	-0.575862	2.68435e-07	6.63489e-07	FALSE	-0.538084	0.000139222	0.000274153	FALSE
IL10RA	3213	19.1968	2735	18.5095	2955	18.3808	4319	27.433	4696	27.6155	4691	27.0684	4776	30.4548	5122	32.72	5374	31.6278	chr11	117857106	117872198	IL10RA	3587	interleukin-10 receptor subunit alpha	GO:0019221//cytokine-mediated signaling pathway; GO:0032496//response to lipopolysaccharide	GO:0005886//plasma membrane; GO:0016021//integral component of membrane	GO:0004920//interleukin-10 receptor activity; GO:0019969//interleukin-10 binding	K05134 interleukin 10 receptor alpha | (RefSeq) IL10RA, CD210, CD210a, CDW210A, HIL-10R, IL-10R1, IL	http://www.genome.jp/dbget-bin/www_bget?hsa:3587	0.427053	1.78174e-27	9.67943e-27	FALSE	0.822355	1.55526e-95	2.71225e-94	FALSE	-0.399262	5.2694e-22	2.46282e-21	FALSE
SARDH	120	0.794312	109	0.817253	140	0.964775	34	0.239255	54	0.351813	43	0.27489	27	0.190743	29	0.205241	40	0.260809	chr9	136528682	136605077	SARDH	1757	sarcosine mitochondrial isoform x1	GO:0035999//tetrahydrofolate interconversion; GO:0042426//choline catabolic process; GO:0055114//oxidation-reduction process	GO:0005759//mitochondrial matrix	GO:0005542//folic acid binding; GO:0008480//sarcosine dehydrogenase activity; GO:0050660//flavin adenine dinucleotide binding	K00314 sarcosine dehydrogenase [EC:1.5.8.3] | (RefSeq) SARDH, BPR-2, DMGDHL1, SAR, SARD, SDH; sarcos	http://www.genome.jp/dbget-bin/www_bget?hsa:1757	-1.68895	1.34474e-17	5.3189e-17	DOWN	-1.8975	2.48593e-20	1.08924e-19	DOWN	0.205027	0.455586	0.527796	FALSE
C11orf91	2	0.04838	6	0.164402	0	0	15	0.385744	22	0.523801	9	0.210261	2	0.0516345	10	0.258638	11	0.262109	chr11	33719654	33722286	C11orf91	100131378	Uncharacterized protein C11orf91	-	-	-	no KO assigned | (RefSeq) C11orf91; chromosome 11 open reading frame 91	http://www.genome.jp/dbget-bin/www_bget?hsa:100131378	2.26562	0.000977762	0.00177172	UP	1.50027	0.0452257	0.0672223	FALSE	0.758464	0.175798	0.224776	FALSE
GDNF-AS1	8	0.0900302	9	0.114726	9	0.105446	4	0.0478553	6	0.0664596	4	0.0434749	29	0.348314	31	0.373006	51	0.565356	chr5	37873527	37875901	-	-	-	-	-	-	-	-	-1.06993	0.0524633	0.0749816	FALSE	2.11202	1.49511e-08	3.99328e-08	UP	-3.18622	2.17462e-14	7.67028e-14	DOWN
SP2	952	6.68223	814	6.47186	855	6.24796	1081	8.06644	1086	7.50278	1058	7.17216	700	5.24392	735	5.51604	713	4.92977	chr17	45973516	46006323	SP2	6668	transcription factor sp2 isoform x1	GO:0006357//regulation of transcription from RNA polymerase II promoter; GO:0006955//immune response; GO:0035264//multicellular organism growth	GO:0005634//nucleus	GO:0000981//RNA polymerase II transcription factor activity, sequence-specific DNA binding; GO:0003677//DNA binding; GO:0042826//histone deacetylase binding; GO:0046872//metal ion binding	K09192 transcription factor Sp2 | (RefSeq) SP2; Sp2 transcription factor	http://www.genome.jp/dbget-bin/www_bget?hsa:6668	0.105381	0.122459	0.163973	FALSE	-0.242011	0.000650086	0.00123043	FALSE	0.343482	4.75625e-06	1.06059e-05	FALSE
KISS1R	0	0	1	0.0152262	6	0.0839672	4	0.0571614	2	0.0264611	1	0.0129823	0	0	0	0	0	0	chr19	917342	921015	KISS1R	84634	kiss-1 receptor	GO:0000186//activation of MAPKK activity; GO:0007200//phospholipase C-activating G-protein coupled receptor signaling pathway; GO:0007218//neuropeptide signaling pathway; GO:0008285//negative regulation of cell proliferation; GO:0019722//calcium-mediated signaling; GO:0046887//positive regulation of hormone secretion; GO:0050482//arachidonic acid secretion; GO:0050806//positive regulation of syna…	GO:0005887//integral component of plasma membrane; GO:0009986//cell surface; GO:0043231//intracellular membrane-bounded organelle	GO:0005515//protein binding; GO:0008188//neuropeptide receptor activity; GO:0042923//neuropeptide binding	K08374 KISS1 receptor | (RefSeq) KISS1R, AXOR12, CPPB1, GPR54, HH8, HOT7T175, KISS-1R; KISS1 recepto	http://www.genome.jp/dbget-bin/www_bget?hsa:84634	-0.178498	1	1	FALSE	-4.27804	0.0229668	0.0358677	DOWN	4.19586	0.0243994	0.0368507	UP
SP3	6228	21.8051	5152	20.4317	5925	21.5966	8370	31.1535	9496	32.7233	9762	33.0087	6963	26.0183	6750	25.2678	7165	24.7103	chr2	174771187	174830430	SP3	6670	transcription factor sp3	GO:0000122//negative regulation of transcription from RNA polymerase II promoter; GO:0001503//ossification; GO:0001779//natural killer cell differentiation; GO:0001829//trophectodermal cell differentiation; GO:0001889//liver development; GO:0001892//embryonic placenta development; GO:0016925//protein sumoylation; GO:0030183//B cell differentiation; GO:0030217//T cell differentiation; GO:0030219//…	GO:0005794//Golgi apparatus; GO:0005886//plasma membrane; GO:0016605//PML body; GO:0017053//transcriptional repressor complex	GO:0000979//RNA polymerase II core promoter sequence-specific DNA binding; GO:0000987//core promoter proximal region sequence-specific DNA binding; GO:0001078//transcriptional repressor activity, RNA polymerase II core promoter proximal region sequence-specific binding; GO:0003682//chromatin binding; GO:0005515//protein binding; GO:0046872//metal ion binding	K09193 transcription factor Sp3 | (RefSeq) SP3, SPR2; Sp3 transcription factor	http://www.genome.jp/dbget-bin/www_bget?hsa:6670	0.47921	8.62e-33	5.41495e-32	FALSE	0.316456	1.76843e-18	7.31329e-18	FALSE	0.158671	4.40774e-05	9.06183e-05	FALSE
SP4	493	1.76164	544	2.20185	555	2.06467	214	0.812934	273	0.960152	256	0.883465	271	1.03351	258	0.9857	300	1.05595	chr7	21467652	21554440	SP4	6671	transcription factor sp4 isoform x1	GO:0006357//regulation of transcription from RNA polymerase II promoter	GO:0005654//nucleoplasm; GO:0005737//cytoplasm; GO:0015630//microtubule cytoskeleton; GO:0045171//intercellular bridge	GO:0000981//RNA polymerase II transcription factor activity, sequence-specific DNA binding; GO:0003677//DNA binding; GO:0003713//transcription coactivator activity; GO:0005515//protein binding; GO:0046872//metal ion binding	K09194 transcription factor Sp4 | (RefSeq) SP4, HF1B, SPR-1; Sp4 transcription factor	http://www.genome.jp/dbget-bin/www_bget?hsa:6671	-1.30208	1.92987e-29	1.10333e-28	DOWN	-0.904179	2.81773e-16	1.06688e-15	FALSE	-0.401944	0.000310392	0.000588443	FALSE
BPIFC	0	0	0	0	1	0.0114854	0	0	0	0	0	0	0	0	0	0	0	0	chr22	32809834	32853373	BPIFC	254240	bpi fold-containing family c protein	-	GO:0005615//extracellular space	GO:0001530//lipopolysaccharide binding; GO:0005543//phospholipid binding	no KO assigned | (RefSeq) BPIFC, BPIL2; BPI fold containing family C	http://www.genome.jp/dbget-bin/www_bget?hsa:254240	-	-	-	-	-	-	-	-	-	-	-	-
IGFBPL1	14	0.0859259	8	0.0556168	6	0.0383385	41	0.267517	69	0.416824	58	0.343799	45	0.294769	50	0.328112	58	0.350653	chr9	38406525	38424444	IGFBPL1	347252	insulin-like growth factor-binding 1	GO:0001558//regulation of cell growth	GO:0005576//extracellular region	GO:0005520//insulin-like growth factor binding	no KO assigned | (RefSeq) IGFBPL1, IGFBP-RP4, IGFBPRP4, bA113O24.1; insulin like growth factor bindi	http://www.genome.jp/dbget-bin/www_bget?hsa:347252	2.37252	3.55014e-12	1.11881e-11	UP	2.478	4.30395e-15	1.55561e-14	UP	-0.110372	0.660306	0.713184	FALSE
ATG4C	455	3.68105	388	3.55559	446	3.7565	306	2.6318	357	2.84273	391	3.05504	359	3.09976	393	3.39945	384	3.06016	chr1	63249777	63330941	ATG4C	84938	cysteine protease atg4c isoform x1	GO:0000045//autophagosome assembly; GO:0000422//mitophagy; GO:0006501//C-terminal protein lipidation; GO:0006612//protein targeting to membrane; GO:0016485//protein processing; GO:0044804//nucleophagy; GO:0051697//protein delipidation	GO:0005576//extracellular region; GO:0005829//cytosol	GO:0004197//cysteine-type endopeptidase activity	K08342 cysteine protease ATG4 [EC:3.4.22.-] | (RefSeq) ATG4C, APG4-C, APG4C, AUTL1, AUTL3; autophagy	http://www.genome.jp/dbget-bin/www_bget?hsa:84938	-0.487502	2.31381e-07	5.58384e-07	FALSE	-0.137353	0.13934	0.188266	FALSE	-0.354457	0.000456406	0.000849897	FALSE
ATG4B	2827	21.3822	2396	20.5274	2765	21.7726	2463	19.8045	2570	19.1323	2315	16.9106	2199	17.7511	2104	17.0148	2445	18.2162	chr2	242577027	242613272	ATG4B	23192	cysteine protease atg4b isoform x1	GO:0000045//autophagosome assembly; GO:0000422//mitophagy; GO:0006501//C-terminal protein lipidation; GO:0006612//protein targeting to membrane; GO:0010508//positive regulation of autophagy; GO:0016485//protein processing; GO:0044804//nucleophagy; GO:0045732//positive regulation of protein catabolic process; GO:0051697//protein delipidation	GO:0005829//cytosol	GO:0004197//cysteine-type endopeptidase activity; GO:0005515//protein binding	K08342 cysteine protease ATG4 [EC:3.4.22.-] | (RefSeq) ATG4B, APG4B, AUTL1; autophagy related 4B cys	http://www.genome.jp/dbget-bin/www_bget?hsa:23192	-0.312822	1.07135e-07	2.64623e-07	FALSE	-0.200087	8.99034e-06	1.9935e-05	FALSE	-0.116587	0.0578465	0.0817975	FALSE
ATG4A	516	4.50491	482	4.76655	565	5.13539	735	6.82175	726	6.23851	864	7.28501	572	5.32975	514	4.79795	642	5.52109	chrX	107334897	107397901	ATG4A	115201	cysteine protease atg4a isoform x1	GO:0000045//autophagosome assembly; GO:0000422//mitophagy; GO:0006464//cellular protein modification process; GO:0006501//C-terminal protein lipidation; GO:0006508//proteolysis; GO:0006612//protein targeting to membrane; GO:0006914//autophagy; GO:0006996//organelle organization; GO:0015031//protein transport; GO:0016485//protein processing; GO:0044763//single-organism cellular process; GO:0044804…	GO:0005737//cytoplasm; GO:0005829//cytosol	GO:0004197//cysteine-type endopeptidase activity; GO:0005515//protein binding; GO:0008234//cysteine-type peptidase activity	K08342 cysteine protease ATG4 [EC:3.4.22.-] | (RefSeq) ATG4A, APG4A, AUTL2; autophagy related 4A cys	http://www.genome.jp/dbget-bin/www_bget?hsa:115201	0.375464	1.72695e-05	3.66561e-05	FALSE	0.185342	0.0386716	0.0584306	FALSE	0.185995	0.0333108	0.0493104	FALSE
KYNU	2302	31.9669	1951	30.6883	2357	34.0756	3189	47.0784	3823	52.2525	3786	50.7757	5444	80.684	5102	75.7515	5614	76.7928	chr2	143635195	143799885	KYNU	8942	kynureninase isoform x2	GO:0019441//tryptophan catabolic process to kynurenine; GO:0019442//tryptophan catabolic process to acetyl-CoA; GO:0019805//quinolinate biosynthetic process; GO:0034341//response to interferon-gamma; GO:0034354//'de novo' NAD biosynthetic process from tryptophan; GO:0034516//response to vitamin B6; GO:0043420//anthranilate metabolic process; GO:0097053//L-kynurenine catabolic process	GO:0005654//nucleoplasm; GO:0005739//mitochondrion; GO:0005829//cytosol	GO:0030170//pyridoxal phosphate binding; GO:0030429//kynureninase activity; GO:0042803//protein homodimerization activity	K01556 kynureninase [EC:3.7.1.3] | (RefSeq) KYNU, KYNUU, VCRL2; kynureninase	http://www.genome.jp/dbget-bin/www_bget?hsa:8942	0.511301	1.66806e-21	7.57342e-21	FALSE	1.33435	7.73192e-203	3.45796e-201	UP	-0.827172	1.81383e-68	2.16158e-67	FALSE
CREB5	6	0.0159695	14	0.0422073	4	0.0110838	43	0.121669	46	0.120505	48	0.123385	22	0.0624937	20	0.0569148	23	0.0603004	chr7	28338940	28865511	CREB5	9586	cyclic amp-responsive element-binding protein 5 isoform x2	GO:0006366//transcription from RNA polymerase II promoter; GO:0045444//fat cell differentiation; GO:0045893//positive regulation of transcription, DNA-templated; GO:0045944//positive regulation of transcription from RNA polymerase II promoter; GO:0060612//adipose tissue development	GO:0005634//nucleus; GO:0070062//extracellular exosome	GO:0001077//transcriptional activator activity, RNA polymerase II core promoter proximal region sequence-specific binding; GO:0003700//transcription factor activity, sequence-specific DNA binding; GO:0005515//protein binding; GO:0043565//sequence-specific DNA binding; GO:0046872//metal ion binding	K09047 cyclic AMP-responsive element-binding protein 5 | (RefSeq) CREB5, CRE-BPA, CREB-5, CREBPA; cA	http://www.genome.jp/dbget-bin/www_bget?hsa:9586	2.29192	1.69081e-10	4.91047e-10	UP	1.45316	0.0009605	0.00178566	UP	0.829039	0.00106281	0.0019038	FALSE
ADAM9	20260	107.966	18467	111.471	19853	110.144	23005	130.329	25600	134.275	27267	140.334	27943	158.925	28328	161.405	29803	156.444	chr8	38854505	38962780	ADAM9	8754	disintegrin and metalloproteinase domain-containing protein 9	GO:0000186//activation of MAPKK activity; GO:0007160//cell-matrix adhesion; GO:0007179//transforming growth factor beta receptor signaling pathway; GO:0007229//integrin-mediated signaling pathway; GO:0010042//response to manganese ion; GO:0030216//keratinocyte differentiation; GO:0033630//positive regulation of cell adhesion mediated by integrin; GO:0033631//cell-cell adhesion mediated by integri…	GO:0005615//extracellular space; GO:0005925//focal adhesion; GO:0016021//integral component of membrane; GO:0031233//intrinsic component of external side of plasma membrane; GO:0070062//extracellular exosome	GO:0004222//metalloendopeptidase activity; GO:0005080//protein kinase C binding; GO:0005178//integrin binding; GO:0005518//collagen binding; GO:0008270//zinc ion binding; GO:0017124//SH3 domain binding; GO:0043236//laminin binding	K06834 disintegrin and metalloproteinase domain-containing protein 9 [EC:3.4.24.-] | (RefSeq) ADAM9,	http://www.genome.jp/dbget-bin/www_bget?hsa:8754	0.17438	3.2694e-06	7.30435e-06	FALSE	0.597783	1.5173e-81	2.26804e-80	FALSE	-0.427525	3.12125e-31	1.92323e-30	FALSE
ATG4D	590	6.39589	492	6.04135	555	6.26369	1200	13.8294	1225	13.0705	1265	13.244	615	7.11538	616	7.13978	700	7.47481	chr19	10654570	10664099	ATG4D	84971	cysteine protease atg4d isoform x1	GO:0000045//autophagosome assembly; GO:0000422//mitophagy; GO:0006501//C-terminal protein lipidation; GO:0006612//protein targeting to membrane; GO:0006915//apoptotic process; GO:0016485//protein processing; GO:0044804//nucleophagy; GO:0051697//protein delipidation	GO:0005759//mitochondrial matrix; GO:0005829//cytosol	GO:0004197//cysteine-type endopeptidase activity	K08342 cysteine protease ATG4 [EC:3.4.22.-] | (RefSeq) ATG4D, APG4-D, APG4D, AUTL4; autophagy relate	http://www.genome.jp/dbget-bin/www_bget?hsa:84971	0.978072	4.61806e-48	4.06471e-47	FALSE	0.281661	0.000170439	0.000340857	FALSE	0.692496	2.22359e-25	1.15453e-24	FALSE
PHOX2A	0	0	0	0	0	0	0	0	0	0	0	0	0	0	0	0	0	0	chr11	71950121	71955220	PHOX2A	401	paired mesoderm homeobox protein 2a	GO:0003357//noradrenergic neuron differentiation; GO:0021523//somatic motor neuron differentiation; GO:0021623//oculomotor nerve formation; GO:0021642//trochlear nerve formation; GO:0021703//locus ceruleus development; GO:0030901//midbrain development; GO:0043576//regulation of respiratory gaseous exchange; GO:0045944//positive regulation of transcription from RNA polymerase II promoter; GO:00484…	GO:0000790//nuclear chromatin	GO:0000977//RNA polymerase II regulatory region sequence-specific DNA binding; GO:0001077//transcriptional activator activity, RNA polymerase II core promoter proximal region sequence-specific binding	K09330 paired mesoderm homeobox protein 2 | (RefSeq) PHOX2A, ARIX, CFEOM2, FEOM2, NCAM2, PMX2A; pair	http://www.genome.jp/dbget-bin/www_bget?hsa:401	-	-	-	-	-	-	-	-	-	-	-	-
PHOX2B	0	0	0	0	0	0	0	0	0	0	0	0	4	0.0307762	0	0	0	0	chr4	41746099	41750987	PHOX2B	8929	paired mesoderm homeobox protein 2b	GO:0001764//neuron migration; GO:0002087//regulation of respiratory gaseous exchange by neurological system process; GO:0003358//noradrenergic neuron development; GO:0003360//brainstem development; GO:0008285//negative regulation of cell proliferation; GO:0010001//glial cell differentiation; GO:0010971//positive regulation of G2/M transition of mitotic cell cycle; GO:0021533//cell differentiation…	GO:0000790//nuclear chromatin	GO:0000978//RNA polymerase II core promoter proximal region sequence-specific DNA binding; GO:0001077//transcriptional activator activity, RNA polymerase II core promoter proximal region sequence-specific binding	K09330 paired mesoderm homeobox protein 2 | (RefSeq) PHOX2B, CCHS, NBLST2, NBPhox, PMX2B; paired lik	http://www.genome.jp/dbget-bin/www_bget?hsa:8929	-	-	-	-	3.56976	0.14041	0.188266	FALSE	-3.66692	0.143164	0.186061	FALSE
FAM193A	1828	8.31184	1531	7.88526	1605	7.59773	2749	13.2882	2791	12.4908	2786	12.2344	1773	8.60406	1603	7.7931	1856	8.31289	chr4	2627159	2734302	FAM193A	8603	Protein FAM193A	-	-	-	no KO assigned | (RefSeq) FAM193A, C4orf8, RES4-22; family with sequence similarity 193 member A	http://www.genome.jp/dbget-bin/www_bget?hsa:8603	0.552434	5.9558e-25	2.98974e-24	FALSE	0.119566	0.0276477	0.042635	FALSE	0.428985	6.47493e-15	2.34666e-14	FALSE
LRGUK	34	0.238804	15	0.119337	24	0.175494	35	0.261339	39	0.26961	38	0.257767	27	0.202396	29	0.21778	35	0.24215	chr7	133812105	133949343	LRGUK	136332	leucine-rich repeat and guanylate kinase domain-containing protein	GO:0007283//spermatogenesis; GO:0016310//phosphorylation; GO:0030154//cell differentiation; GO:0035082//axoneme assembly	GO:0001669//acrosomal vesicle; GO:0002177//manchette; GO:0005654//nucleoplasm	GO:0005524//ATP binding; GO:0016301//kinase activity	no KO assigned | (RefSeq) LRGUK, CFAP246; leucine rich repeats and guanylate kinase domain containin	http://www.genome.jp/dbget-bin/www_bget?hsa:136332	0.427431	0.130547	0.174046	FALSE	0.366649	0.241682	0.307429	FALSE	0.0572016	0.862026	0.896034	FALSE
LOC100129216	3	0.307656	4	0.464648	3	0.320298	3	0.327068	3	0.302812	3	0.297129	2	0.218901	6	0.657887	5	0.505089	chr11	71589499	71595607	LOC100129216	100129216	beta-defensin 43-like	GO:0042742//defense response to bacterium; GO:0045087//innate immune response	GO:0005576//extracellular region; GO:0009986//cell surface	-	no KO assigned | (RefSeq) DEFB131B; defensin beta 131B	http://www.genome.jp/dbget-bin/www_bget?hsa:100129216	-0.337272	0.681227	0.732587	FALSE	0.404337	0.71738	0.773246	FALSE	-0.746396	0.354243	0.421716	FALSE
UPK2	1	0.0233871	0	0	4	0.0973924	6	0.149176	2	0.0460378	3	0.0677608	2	0.0499207	1	0.0250053	2	0.0460745	chr11	118827008	118829269	UPK2	7379	uroplakin-2	GO:0007275//multicellular organismal development; GO:0030855//epithelial cell differentiation; GO:0061024//membrane organization	GO:0005887//integral component of plasma membrane; GO:0016324//apical plasma membrane; GO:0030176//integral component of endoplasmic reticulum membrane; GO:0070062//extracellular exosome	GO:0005515//protein binding	no KO assigned | (RefSeq) UPK2, UP2, UPII; uroplakin 2	http://www.genome.jp/dbget-bin/www_bget?hsa:7379	0.909696	0.374241	0.443598	FALSE	0.0441404	1	1	FALSE	0.860602	0.522049	0.58095	FALSE
CFH	0	0	2	0.016628	0	0	0	0	0	0	4	0.0283551	8	0.0626693	6	0.0470866	10	0.072301	chr1	196621008	196716634	CFH	3075	complement factor h	GO:0006957//complement activation, alternative pathway; GO:0030449//regulation of complement activation	GO:0070062//extracellular exosome; GO:0072562//blood microparticle	GO:0008201//heparin binding; GO:0043395//heparan sulfate proteoglycan binding	K04004 complement factor H | (RefSeq) CFH, AHUS1, AMBP1, ARMD4, ARMS1, CFHL3, FH, FHL1, HF, HF1, HF2	http://www.genome.jp/dbget-bin/www_bget?hsa:3075	0.692088	0.707207	0.754767	FALSE	3.39072	9.66775e-05	0.000196821	UP	-2.71191	0.00027412	0.000522535	DOWN
CFI	0	0	0	0	0	0	0	0	0	0	0	0	0	0	0	0	0	0	chr4	110661848	110723381	CFI	3426	complement factor i isoform x1	GO:0006898//receptor-mediated endocytosis; GO:0006958//complement activation, classical pathway; GO:0030449//regulation of complement activation; GO:0045087//innate immune response	GO:0005615//extracellular space; GO:0016020//membrane; GO:0070062//extracellular exosome	GO:0004252//serine-type endopeptidase activity; GO:0005044//scavenger receptor activity; GO:0005515//protein binding; GO:0046872//metal ion binding	K01333 complement factor I [EC:3.4.21.45] | (RefSeq) CFI, AHUS3, ARMD13, C3BINA, C3b-INA, FI, IF, KA	http://www.genome.jp/dbget-bin/www_bget?hsa:3426	-	-	-	-	-	-	-	-	-	-	-	-
PNP	4467	40.3037	3956	40.4302	4126	38.7567	11139	106.843	11519	102.294	11843	103.198	8596	82.7751	8541	82.3936	9346	83.0631	chr14	20937538	20946165	PNP	4860	purine nucleoside phosphorylase	GO:0002230//positive regulation of defense response to virus by host; GO:0006148//inosine catabolic process; GO:0006195//purine nucleotide catabolic process; GO:0006738//nicotinamide riboside catabolic process; GO:0006955//immune response; GO:0007218//neuropeptide signaling pathway; GO:0007267//cell-cell signaling; GO:0007586//digestion; GO:0007631//feeding behavior; GO:0032098//regulation of app…	GO:0005615//extracellular space; GO:0005634//nucleus; GO:0005829//cytosol; GO:0005856//cytoskeleton; GO:0070062//extracellular exosome	GO:0001664//G-protein coupled receptor binding; GO:0001882//nucleoside binding; GO:0002060//purine nucleobase binding; GO:0004731//purine-nucleoside phosphorylase activity; GO:0005184//neuropeptide hormone activity; GO:0008144//drug binding; GO:0042301//phosphate ion binding	K03783 purine-nucleoside phosphorylase [EC:2.4.2.1] | (RefSeq) PNP, NP, PRO1837, PUNP; purine nucleo	http://www.genome.jp/dbget-bin/www_bget?hsa:4860	1.2634	1.81569e-245	1.1129e-243	UP	1.12015	1.20752e-248	7.58095e-247	UP	0.139289	5.5955e-05	0.00011403	FALSE
CFD	2553	49.1336	2250	49.0491	2345	46.985	6051	123.802	5977	113.219	5704	106.02	1760	36.1505	1775	36.5243	1976	37.46	chr19	859659	863569	CFD	1675	complement factor d	GO:0002576//platelet degranulation; GO:0006508//proteolysis; GO:0006957//complement activation, alternative pathway	GO:0005615//extracellular space; GO:0031093//platelet alpha granule lumen; GO:0070062//extracellular exosome	GO:0004252//serine-type endopeptidase activity	K01334 complement factor D [EC:3.4.21.46] | (RefSeq) CFD, ADIPSIN, ADN, DF, PFD; complement factor D	http://www.genome.jp/dbget-bin/www_bget?hsa:1675	1.11754	7.29472e-96	1.30725e-94	UP	-0.332809	2.42475e-13	8.20931e-13	FALSE	1.4466	3.46417e-148	9.81168e-147	UP
CFB	23	0.191246	18	0.169534	19	0.164477	88	0.777891	58	0.474679	51	0.409557	52	0.461468	68	0.604545	65	0.532391	chr6	31913721	31919861	CFB	629	complement factor b	GO:0006957//complement activation, alternative pathway; GO:0030449//regulation of complement activation	GO:0005886//plasma membrane; GO:0070062//extracellular exosome; GO:0072562//blood microparticle	GO:0001848//complement binding; GO:0004252//serine-type endopeptidase activity	K01335 complement factor B [EC:3.4.21.47] | (RefSeq) CFB, AHUS4, ARMD14, BF, BFD, CFAB, CFBD, FB, FB	http://www.genome.jp/dbget-bin/www_bget?hsa:629	1.52692	1.08923e-06	2.50975e-06	UP	1.66258	1.17257e-10	3.51751e-10	UP	-0.140983	0.621306	0.677086	FALSE
OR5P3	0	0	0	0	0	0	0	0	0	0	0	0	0	0	0	0	0	0	chr11	7846584	7847519	OR5P3	120066	olfactory receptor 5p3	GO:0007186//G-protein coupled receptor signaling pathway; GO:0050911//detection of chemical stimulus involved in sensory perception of smell	GO:0005886//plasma membrane; GO:0016021//integral component of membrane	GO:0004930//G-protein coupled receptor activity; GO:0004984//olfactory receptor activity; GO:0005549//odorant binding	K04257 olfactory receptor | (RefSeq) OR5P3, JCG1; olfactory receptor family 5 subfamily P member 3	http://www.genome.jp/dbget-bin/www_bget?hsa:120066	-	-	-	-	-	-	-	-	-	-	-	-
OR5P2	0	0	0	0	0	0	0	0	0	0	0	0	0	0	0	0	0	0	chr11	7817521	7818489	OR5P2	120065	olfactory receptor 5p2	GO:0007186//G-protein coupled receptor signaling pathway; GO:0050911//detection of chemical stimulus involved in sensory perception of smell	GO:0005886//plasma membrane; GO:0016021//integral component of membrane	GO:0004930//G-protein coupled receptor activity; GO:0004984//olfactory receptor activity; GO:0005549//odorant binding	K04257 olfactory receptor | (RefSeq) OR5P2, JCG3, JCG4; olfactory receptor family 5 subfamily P memb	http://www.genome.jp/dbget-bin/www_bget?hsa:120065	-	-	-	-	-	-	-	-	-	-	-	-
SMKR1	4	0.0844196	9	0.215152	13	0.285637	17	0.381421	14	0.290817	28	0.570718	4	0.0900985	1	0.0225652	4	0.0831566	chr7	129142320	129152773	SMKR1	100287482	---	-	-	-	no KO assigned | (RefSeq) SMKR1; small lysine rich protein 1	http://www.genome.jp/dbget-bin/www_bget?hsa:100287482	0.966135	0.0409796	0.0599855	FALSE	-1.46265	0.0335082	0.0511259	FALSE	2.42333	8.32437e-06	1.82135e-05	UP
CDH23	4893	26.3773	4460	27.2339	4649	26.0917	3192	18.2932	3355	17.8014	3210	16.7124	3517	20.2349	3616	20.842	3975	21.1079	chr10	73156691	73575704	CDH23	64072	cdh23 protein	GO:0006816//calcium ion transport; GO:0007156//homophilic cell adhesion via plasma membrane adhesion molecules; GO:0007601//visual perception; GO:0007605//sensory perception of sound; GO:0007626//locomotory behavior; GO:0016339//calcium-dependent cell-cell adhesion via plasma membrane cell adhesion molecules; GO:0045494//photoreceptor cell maintenance; GO:0050896//response to stimulus; GO:0050957…	GO:0005829//cytosol; GO:0005886//plasma membrane; GO:0016021//integral component of membrane; GO:0032420//stereocilium	GO:0005509//calcium ion binding; GO:0005515//protein binding	K06813 cadherin 23 | (RefSeq) CDH23, CDHR23, PITA5, USH1D, DFNB12; cadherin related 23	http://www.genome.jp/dbget-bin/www_bget?hsa:64072	-0.716901	6.42646e-60	6.969e-59	FALSE	-0.292483	8.86744e-15	3.16176e-14	FALSE	-0.428279	1.09714e-20	4.92987e-20	FALSE
MRLN	0	0	0	0	0	0	0	0	0	0	0	0	0	0	0	0	0	0	chr10	61496748	61513203	MRLN	100507027	myoregulin	GO:0043086//negative regulation of catalytic activity; GO:1902081//negative regulation of calcium ion import into sarcoplasmic reticulum	GO:0016021//integral component of membrane; GO:0033017//sarcoplasmic reticulum membrane	GO:0004857//enzyme inhibitor activity	K22643 myoregulin | (RefSeq) MRLN, LINC00948, Linc-RAM, M1, MLN, MUSER1; myoregulin	http://www.genome.jp/dbget-bin/www_bget?hsa:100507027	-	-	-	-	-	-	-	-	-	-	-	-
CDKAL1	305	2.03615	222	1.67874	286	1.98776	227	1.61105	234	1.53757	275	1.77306	162	1.15425	226	1.61315	251	1.65058	chr6	20534688	21232635	CDKAL1	54901	threonylcarbamoyladenosine trna methylthiotransferase	GO:0035600//tRNA methylthiolation; GO:1990145//maintenance of translational fidelity	GO:0005789//endoplasmic reticulum membrane; GO:0005791//rough endoplasmic reticulum; GO:0016021//integral component of membrane	GO:0005515//protein binding; GO:0035598//N6-threonylcarbomyladenosine methylthiotransferase activity; GO:0046872//metal ion binding; GO:0051539//4 iron, 4 sulfur cluster binding; GO:0061712//tRNA (N(6)-L-threonylcarbamoyladenosine(37)-C(2))-methylthiotransferase	K15865 threonylcarbamoyladenosine tRNA methylthiotransferase CDKAL1 [EC:2.8.4.5] | (RefSeq) CDKAL1;	http://www.genome.jp/dbget-bin/www_bget?hsa:54901	-0.336512	0.0048703	0.00813336	FALSE	-0.302452	0.0451423	0.0671223	FALSE	-0.0373391	0.809057	0.848815	FALSE
BRF1	1094	7.72612	911	7.28757	947	6.96277	1235	9.2722	1344	9.34224	1416	9.658	607	4.57516	645	4.87034	796	5.53746	chr14	105675623	105781914	BRF1	2972	transcription factor iiib 90 kda subunit isoform x6	GO:0000288//nuclear-transcribed mRNA catabolic process, deadenylation-dependent decay; GO:0001570//vasculogenesis; GO:0003342//proepicardium development; GO:0006355//regulation of transcription, DNA-templated; GO:0006384//transcription initiation from RNA polymerase III promoter; GO:0006413//translational initiation; GO:0006417//regulation of translation; GO:0006915//apoptotic process; GO:0007507…	GO:0000126//transcription factor TFIIIB complex; GO:0005654//nucleoplasm; GO:0005829//cytosol	GO:0003677//DNA binding; GO:0003700//transcription factor activity, sequence-specific DNA binding; GO:0003729//mRNA binding; GO:0003743//translation initiation factor activity; GO:0008270//zinc ion binding; GO:0017025//TBP-class protein binding; GO:0017091//AU-rich element binding	K15196 transcription factor IIIB 90 kDa subunit | (RefSeq) BRF1, BRF, BRF-1, CFDS, GTF3B, HEL-S-76p,	http://www.genome.jp/dbget-bin/www_bget?hsa:2972	0.240601	0.000104704	0.00020841	FALSE	-0.4862	1.53687e-09	4.35363e-09	FALSE	0.722786	9.18766e-22	4.25552e-21	FALSE
PNN	2085	12.63	1833	12.5771	1893	11.9381	3850	24.7931	4294	25.6017	4495	26.2971	2303	14.889	2392	15.4923	2406	14.3564	chr14	39644387	39652422	PNN	5411	pinin	GO:0000398//mRNA splicing, via spliceosome; GO:0006355//regulation of transcription, DNA-templated; GO:0007155//cell adhesion	GO:0005882//intermediate filament; GO:0005886//plasma membrane; GO:0016607//nuclear speck; GO:0030057//desmosome; GO:0035145//exon-exon junction complex; GO:0071013//catalytic step 2 spliceosome	GO:0003677//DNA binding; GO:0005198//structural molecule activity; GO:0044822//poly(A) RNA binding	K13114 pinin | (RefSeq) PNN, DRS, DRSP, SDK3, memA; pinin, desmosome associated protein	http://www.genome.jp/dbget-bin/www_bget?hsa:5411	0.923511	9.13067e-92	1.55084e-90	FALSE	0.333303	7.90498e-12	2.49934e-11	FALSE	0.586158	1.35058e-36	9.39488e-36	FALSE
ATP6V0E1	5956	147.506	5386	151.092	6071	156.532	10247	269.789	10924	266.284	10355	247.677	7860	207.755	7612	201.562	8583	209.386	chr5	172410763	172461900	ATP6V0E1	8992	v-type proton atpase subunit e 1	GO:0007035//vacuolar acidification; GO:0008286//insulin receptor signaling pathway; GO:0015991//ATP hydrolysis coupled proton transport; GO:0016049//cell growth; GO:0016241//regulation of macroautophagy; GO:0033572//transferrin transport; GO:0043200//response to amino acid; GO:0090383//phagosome acidification	GO:0010008//endosome membrane; GO:0016021//integral component of membrane; GO:0030670//phagocytic vesicle membrane; GO:0033179//proton-transporting V-type ATPase, V0 domain	GO:0046961//proton-transporting ATPase activity, rotational mechanism	K02153 V-type H+-transporting ATPase subunit e | (RefSeq) ATP6V0E1, ATP6H, ATP6V0E, M9.2, Vma21, Vma	http://www.genome.jp/dbget-bin/www_bget?hsa:8992	0.661238	1.38759e-53	1.35375e-52	FALSE	0.508223	1.11316e-45	9.33919e-45	FALSE	0.149036	0.000279847	0.000532794	FALSE
ATP6V0E2	536	4.35248	369	3.39405	447	3.77892	396	3.41853	431	3.44474	381	2.98797	230	1.9933	238	2.06635	248	1.9837	chr7	149570057	149577802	ATP6V0E2	155066	v-type proton atpase subunit e 2	GO:0007035//vacuolar acidification; GO:0008286//insulin receptor signaling pathway; GO:0015991//ATP hydrolysis coupled proton transport; GO:0016049//cell growth; GO:0016241//regulation of macroautophagy; GO:0033572//transferrin transport; GO:0090383//phagosome acidification	GO:0010008//endosome membrane; GO:0016021//integral component of membrane; GO:0030670//phagocytic vesicle membrane; GO:0033179//proton-transporting V-type ATPase, V0 domain	GO:0046961//proton-transporting ATPase activity, rotational mechanism	K02153 V-type H+-transporting ATPase subunit e | (RefSeq) ATP6V0E2, ATP6V0E2L, C7orf32; ATPase H+ tr	http://www.genome.jp/dbget-bin/www_bget?hsa:155066	-0.351265	0.00142826	0.00254496	FALSE	-0.867371	3.68863e-14	1.28978e-13	FALSE	0.512326	1.47695e-06	3.42139e-06	FALSE
CFP	110	1.45096	96	1.43435	86	1.181	107	1.50044	102	1.32425	128	1.63062	114	1.60488	132	1.86163	137	1.78007	chrX	47483612	47489704	CFP	5199	properdin	GO:0006957//complement activation, alternative pathway; GO:0030449//regulation of complement activation; GO:0036066//protein O-linked fucosylation; GO:0042742//defense response to bacterium	GO:0005615//extracellular space; GO:0005788//endoplasmic reticulum lumen; GO:0031012//extracellular matrix	-	K15412 complement factor properdin | (RefSeq) CFP, BFD, PFC, PFD, PROPERDIN; complement factor prope	http://www.genome.jp/dbget-bin/www_bget?hsa:5199	0.0098367	0.977878	0.999442	FALSE	0.43344	0.00657205	0.0110993	FALSE	-0.427542	0.00518194	0.00856633	FALSE
AAAS	1030	12.5833	1032	14.2809	940	11.9556	853	11.0784	750	9.01832	863	10.1823	902	11.7608	930	12.1477	1079	12.9847	chr12	53701240	53715412	AAAS	8086	aladin isoform x2	GO:0006406//mRNA export from nucleus; GO:0006409//tRNA export from nucleus; GO:0007077//mitotic nuclear envelope disassembly; GO:0007612//learning; GO:0009566//fertilization; GO:0010827//regulation of glucose transport; GO:0015031//protein transport; GO:0016925//protein sumoylation; GO:0019083//viral transcription; GO:0031047//gene silencing by RNA; GO:0046822//regulation of nucleocytoplasmic tra…	GO:0005643//nuclear pore; GO:0005654//nucleoplasm; GO:0005737//cytoplasm; GO:0005813//centrosome; GO:0031965//nuclear membrane	-	K14320 aladin | (RefSeq) AAAS, AAA, AAASb, ADRACALA, ADRACALIN, ALADIN, GL003; aladin WD repeat nucl	http://www.genome.jp/dbget-bin/www_bget?hsa:8086	-0.4814	7.16672e-08	1.78925e-07	FALSE	-0.00691908	0.924926	0.958216	FALSE	-0.478396	6.76147e-09	1.81667e-08	FALSE
HAMP	2	0.0742979	2	0.0841582	4	0.154702	28	1.1058	39	1.426	32	1.14809	54	2.14099	105	4.17053	78	2.85427	chr19	35773249	35776046	HAMP	57817	hepcidin	GO:0000122//negative regulation of transcription from RNA polymerase II promoter; GO:0002092//positive regulation of receptor internalization; GO:0006879//cellular iron ion homeostasis; GO:0006955//immune response; GO:0010039//response to iron ion; GO:0031640//killing of cells of other organism; GO:0042742//defense response to bacterium; GO:0050832//defense response to fungus; GO:0060586//multice…	GO:0005615//extracellular space; GO:0045179//apical cortex	GO:0005179//hormone activity; GO:0097690//iron channel inhibitor activity	K23106 hepcidin | (RefSeq) HAMP, HEPC, HFE2B, LEAP1, PLTR; hepcidin antimicrobial peptide	http://www.genome.jp/dbget-bin/www_bget?hsa:57817	3.37623	7.63585e-14	2.58713e-13	UP	4.86996	6.32855e-27	3.38874e-26	UP	-1.50272	8.32172e-08	2.09541e-07	DOWN
LTBP1	160	0.653144	101	0.467015	132	0.560985	43	0.186608	56	0.225001	69	0.272031	34	0.14813	41	0.178949	41	0.164864	chr2	33172369	33624576	LTBP1	4052	latent-transforming growth factor beta-binding protein 1 isoform x1	GO:0003281//ventricular septum development; GO:0035583//sequestering of TGFbeta in extracellular matrix; GO:0035904//aorta development; GO:0060976//coronary vasculature development	GO:0001527//microfibril; GO:0005578//proteinaceous extracellular matrix; GO:0043234//protein complex	GO:0005024//transforming growth factor beta-activated receptor activity; GO:0005509//calcium ion binding; GO:0050431//transforming growth factor beta binding; GO:0050436//microfibril binding	K19559 latent transforming growth factor beta binding protein 1 | (RefSeq) LTBP1; latent transformin	http://www.genome.jp/dbget-bin/www_bget?hsa:4052	-1.41692	2.17148e-12	6.89858e-12	DOWN	-1.70703	6.91733e-17	2.68887e-16	DOWN	0.286157	0.229837	0.286311	FALSE
SIDT1	15	0.0660725	19	0.0947989	23	0.105474	12	0.0561931	20	0.0867097	19	0.0808283	17	0.0799195	0	0	5	0.0216947	chr3	113251218	113348422	SIDT1	54847	sid1 transmembrane family member 1 isoform x2	GO:0033227//dsRNA transport	GO:0016021//integral component of membrane	GO:0051033//RNA transmembrane transporter activity	no KO assigned | (RefSeq) SIDT1, SID-1, SID1; SID1 transmembrane family member 1	http://www.genome.jp/dbget-bin/www_bget?hsa:54847	-0.36038	0.315667	0.381384	FALSE	-1.31651	0.0178239	0.028336	DOWN	0.945847	0.111159	0.149013	FALSE
SIDT2	1733	9.65933	1495	9.43865	1679	9.74288	843	4.99515	886	4.8606	876	4.71556	1262	7.50727	1367	8.14653	1445	7.93359	chr11	117049939	117068161	SIDT2	51092	sid1 transmembrane family member 2 isoform x3	GO:0000902//cell morphogenesis; GO:0003323//type B pancreatic cell development; GO:0033227//dsRNA transport; GO:0044342//type B pancreatic cell proliferation; GO:0061178//regulation of insulin secretion involved in cellular response to glucose stimulus	GO:0005765//lysosomal membrane; GO:0016021//integral component of membrane	GO:0051033//RNA transmembrane transporter activity	no KO assigned | (RefSeq) SIDT2, CGI-40; SID1 transmembrane family member 2	http://www.genome.jp/dbget-bin/www_bget?hsa:51092	-1.10834	1.25493e-84	1.95664e-83	DOWN	-0.224889	1.49882e-05	3.26556e-05	FALSE	-0.887326	1.12905e-42	9.06764e-42	FALSE
CDH24	137	0.855998	125	0.884673	111	0.722044	194	1.28862	155	0.953217	197	1.18877	212	1.41372	244	1.63004	317	1.95103	chr14	23516270	23526747	CDH24	64403	cadherin-24 isoform x1	GO:0007156//homophilic cell adhesion via plasma membrane adhesion molecules; GO:0016337//single organismal cell-cell adhesion; GO:0034332//adherens junction organization	GO:0005886//plasma membrane; GO:0005911//cell-cell junction; GO:0016021//integral component of membrane	GO:0005509//calcium ion binding; GO:0008013//beta-catenin binding; GO:0045294//alpha-catenin binding; GO:0070097//delta-catenin binding	K06814 cadherin-like 24 | (RefSeq) CDH24, CDH11L; cadherin 24	http://www.genome.jp/dbget-bin/www_bget?hsa:64403	0.354564	0.0263388	0.03967	FALSE	1.08723	7.04754e-12	2.23503e-11	UP	-0.736536	2.8451e-06	6.44232e-06	FALSE
SAP25	90	2.34877	50	1.47805	89	2.41811	86	2.38599	87	2.23473	127	3.20097	79	2.20039	94	2.6229	94	2.41646	chr7	100169851	100171270	SAP25	100316904	histone deacetylase complex subunit sap25	GO:0006355//regulation of transcription, DNA-templated	GO:0005634//nucleus; GO:0005737//cytoplasm	-	K19193 histone deacetylase complex subunit SAP25 | (RefSeq) SAP25; Sin3A associated protein 25	http://www.genome.jp/dbget-bin/www_bget?hsa:100316904	0.198863	0.389197	0.459491	FALSE	0.273114	0.185165	0.241919	FALSE	-0.0784188	0.702584	0.753818	FALSE
SIX4	131	0.456017	143	0.563854	181	0.655959	145	0.536599	153	0.524215	168	0.564806	73	0.271211	89	0.33125	94	0.322323	chr14	61176256	61190852	SIX4	51804	homeobox protein six4 isoform x1	GO:0008582//regulation of synaptic growth at neuromuscular junction; GO:0008584//male gonad development; GO:0030238//male sex determination; GO:0030910//olfactory placode formation; GO:0032880//regulation of protein localization; GO:0034504//protein localization to nucleus; GO:0042472//inner ear morphogenesis; GO:0043524//negative regulation of neuron apoptotic process; GO:0045214//sarcomere orga…	GO:0005634//nucleus; GO:0005737//cytoplasm	GO:0000978//RNA polymerase II core promoter proximal region sequence-specific DNA binding; GO:0001077//transcriptional activator activity, RNA polymerase II core promoter proximal region sequence-specific binding	K15615 homeobox protein SIX4 | (RefSeq) SIX4, AREC3; SIX homeobox 4	http://www.genome.jp/dbget-bin/www_bget?hsa:51804	-0.164902	0.297368	0.361444	FALSE	-0.790043	1.71947e-05	3.73312e-05	FALSE	0.620399	4.36139e-05	8.96872e-05	FALSE
SIX5	471	3.08866	412	3.06032	416	2.84008	476	3.3184	575	3.71129	509	3.22364	272	1.90367	320	2.24365	287	1.85389	chr19	46268043	46272497	SIX5	147912	homeobox protein six5	GO:0002088//lens development in camera-type eye; GO:0007286//spermatid development; GO:0045892//negative regulation of transcription, DNA-templated; GO:0045944//positive regulation of transcription from RNA polymerase II promoter; GO:1902723//negative regulation of skeletal muscle satellite cell proliferation	GO:0005654//nucleoplasm; GO:0005794//Golgi apparatus	GO:0000978//RNA polymerase II core promoter proximal region sequence-specific DNA binding; GO:0005515//protein binding	K19474 homeobox protein SIX5 | (RefSeq) SIX5, BOR2, DMAHP; SIX homeobox 5	http://www.genome.jp/dbget-bin/www_bget?hsa:147912	0.0675432	0.467581	0.54019	FALSE	-0.518433	9.79595e-07	2.33155e-06	FALSE	0.581888	6.2446e-08	1.58531e-07	FALSE
SIX6	0	0	0	0	0	0	0	0	0	0	0	0	0	0	0	0	0	0	chr14	60975938	60978525	SIX6	4990	homeobox protein six6	GO:0001654//eye development; GO:0007601//visual perception; GO:0009887//organ morphogenesis; GO:0045944//positive regulation of transcription from RNA polymerase II promoter	GO:0005634//nucleus	GO:0001205//transcriptional activator activity, RNA polymerase II distal enhancer sequence-specific binding; GO:0003677//DNA binding	K19473 homeobox protein SIX3/6 | (RefSeq) SIX6, MCOPCT2, ODRMD, OPTX2, Six9; SIX homeobox 6	http://www.genome.jp/dbget-bin/www_bget?hsa:4990	-	-	-	-	-	-	-	-	-	-	-	-
SAGE1	0	0	0	0	0	0	0	0	2	0.0141167	0	0	0	0	0	0	0	0	chrX	134975785	134995220	SAGE1	55511	sarcoma antigen 1 isoform x1	-	GO:0005654//nucleoplasm	-	no KO assigned | (RefSeq) SAGE1, CT14, SAGE; sarcoma antigen 1	http://www.genome.jp/dbget-bin/www_bget?hsa:55511	2.58185	0.511207	0.569478	FALSE	-	-	-	-	2.5636	0.511973	0.570784	FALSE
MR1	2843	8.09665	2611	8.42278	2844	8.4323	2941	8.90421	3063	8.58585	3187	8.76578	4521	13.7416	4288	13.0569	4542	12.7417	chr1	181002561	181031074	MR1	3140	major histocompatibility complex class i-related gene protein isoform x3	GO:0002367//cytokine production involved in immune response; GO:0002474//antigen processing and presentation of peptide antigen via MHC class I; GO:0007165//signal transduction; GO:0019243//methylglyoxal catabolic process to D-lactate via S-lactoyl-glutathione; GO:0032225//regulation of synaptic transmission, dopaminergic; GO:0032611//interleukin-1 beta production; GO:0032620//interleukin-17 prod…	GO:0005576//extracellular region; GO:0005634//nucleus; GO:0005739//mitochondrion; GO:0005789//endoplasmic reticulum membrane; GO:0016021//integral component of membrane; GO:0042612//MHC class I protein complex	GO:0004416//hydroxyacylglutathione hydrolase activity; GO:0005515//protein binding; GO:0032393//MHC class I receptor activity; GO:0042605//peptide antigen binding; GO:0046872//metal ion binding	no KO assigned | (RefSeq) MR1, HLALS; major histocompatibility complex, class I-related	http://www.genome.jp/dbget-bin/www_bget?hsa:3140	-0.0491573	0.254122	0.315196	FALSE	0.729328	1.29334e-68	1.61542e-67	FALSE	-0.782559	1.50523e-72	1.91466e-71	FALSE
SIX2	69	0.699725	58	0.666233	78	0.823495	150	1.61712	139	1.3874	154	1.50827	30	0.324693	49	0.531288	41	0.409558	chr2	45232324	45236542	SIX2	10736	homeobox protein six2	GO:0003337//mesenchymal to epithelial transition involved in metanephros morphogenesis; GO:0006606//protein import into nucleus; GO:0007501//mesodermal cell fate specification; GO:0009948//anterior/posterior axis specification; GO:0016477//cell migration; GO:0030278//regulation of ossification; GO:0032330//regulation of chondrocyte differentiation; GO:0042474//middle ear morphogenesis; GO:0045596…	GO:0005654//nucleoplasm; GO:0005737//cytoplasm; GO:0005886//plasma membrane; GO:0031965//nuclear membrane	GO:0000978//RNA polymerase II core promoter proximal region sequence-specific DNA binding; GO:0001077//transcriptional activator activity, RNA polymerase II core promoter proximal region sequence-specific binding; GO:0008134//transcription factor binding; GO:0032403//protein complex binding	K19472 homeobox protein SIX2 | (RefSeq) SIX2; SIX homeobox 2	http://www.genome.jp/dbget-bin/www_bget?hsa:10736	0.916786	2.4285e-08	6.25502e-08	FALSE	-0.725507	0.00195968	0.00352573	FALSE	1.63926	2.88781e-17	1.15146e-16	UP
SIX3	87	0.753227	113	1.10817	88	0.79319	26	0.239305	25	0.213037	30	0.250846	22	0.203284	18	0.166623	29	0.247319	chr2	45169037	45173216	SIX3	6496	homeobox protein six3	GO:0000060//protein import into nucleus, translocation; GO:0002070//epithelial cell maturation; GO:0003404//optic vesicle morphogenesis; GO:0007601//visual perception; GO:0009946//proximal/distal axis specification; GO:0014016//neuroblast differentiation; GO:0021797//forebrain anterior/posterior pattern specification; GO:0021798//forebrain dorsal/ventral pattern formation; GO:0021846//cell prolif…	GO:0005634//nucleus	GO:0000980//RNA polymerase II distal enhancer sequence-specific DNA binding; GO:0001205//transcriptional activator activity, RNA polymerase II distal enhancer sequence-specific binding; GO:0001222//transcription corepressor binding; GO:0003713//transcription coactivator activity; GO:0005102//receptor binding; GO:0042826//histone deacetylase binding	K19473 homeobox protein SIX3/6 | (RefSeq) SIX3, HPE2; SIX homeobox 3	http://www.genome.jp/dbget-bin/www_bget?hsa:6496	-2.03002	6.0583e-17	2.33551e-16	DOWN	-2.02546	6.61972e-15	2.36996e-14	DOWN	-0.00924778	1	1	FALSE
CNPY4	151	2.2438	102	1.71683	156	2.41334	102	1.61131	104	1.52106	85	1.21985	90	1.42733	111	1.76354	119	1.74183	chr7	99717265	99723131	CNPY4	245812	protein canopy homolog 4	-	GO:0005576//extracellular region	GO:0005102//receptor binding	K22816 protein canopy 3/4 | (RefSeq) CNPY4, PRAT4B; canopy FGF signaling regulator 4	http://www.genome.jp/dbget-bin/www_bget?hsa:245812	-0.677391	0.000177817	0.000346598	FALSE	-0.305923	0.0794086	0.113081	FALSE	-0.375645	0.0326059	0.0483608	FALSE
NAALAD2	29	0.201291	29	0.228005	41	0.296278	63	0.464879	51	0.348422	79	0.529583	28	0.207424	44	0.326539	38	0.259815	chr11	89867818	89925779	NAALAD2	10003	n-acetylated-alpha-linked acidic dipeptidase 2	GO:0006508//proteolysis; GO:0008652//cellular amino acid biosynthetic process; GO:0042135//neurotransmitter catabolic process	GO:0005886//plasma membrane; GO:0016021//integral component of membrane	GO:0004180//carboxypeptidase activity; GO:0008236//serine-type peptidase activity; GO:0008237//metallopeptidase activity; GO:0008239//dipeptidyl-peptidase activity; GO:0016805//dipeptidase activity; GO:0046872//metal ion binding; GO:0050129//N-formylglutamate deformylase activity	K01301 N-acetylated-alpha-linked acidic dipeptidase [EC:3.4.17.21] | (RefSeq) NAALAD2, GCPIII, GPCII	http://www.genome.jp/dbget-bin/www_bget?hsa:10003	0.763837	0.00275346	0.00475261	FALSE	0.194239	0.485533	0.567774	FALSE	0.565291	0.0259694	0.0390681	FALSE
CNPY2	1441	26.7658	1201	25.2685	1266	24.4815	1477	29.1655	1572	28.7393	1604	28.7741	1620	32.1148	1588	31.5372	1746	31.9458	chr12	56704212	56710128	CNPY2	10330	protein canopy homolog 2	GO:0010629//negative regulation of gene expression; GO:0010988//regulation of low-density lipoprotein particle clearance; GO:0045716//positive regulation of low-density lipoprotein particle receptor biosynthetic process	GO:0005783//endoplasmic reticulum; GO:0005887//integral component of plasma membrane	GO:0005515//protein binding	K22936 protein canopy 1/2 | (RefSeq) CNPY2, HP10390, MSAP, TMEM4, ZSIG9; canopy FGF signaling regula	http://www.genome.jp/dbget-bin/www_bget?hsa:10330	0.0567472	0.31395	0.379473	FALSE	0.386128	6.79847e-14	2.35246e-13	FALSE	-0.333397	9.52338e-11	2.8393e-10	FALSE
CNPY1	2	0.0195556	0	0	0	0	2	0.0207894	2	0.0192477	0	0	0	0	0	0	0	0	chr7	155293953	155326539	CNPY1	285888	Protein canopy homolog 1	-	-	-	K22936 protein canopy 1/2 | (RefSeq) CNPY1; canopy FGF signaling regulator 1	http://www.genome.jp/dbget-bin/www_bget?hsa:285888	0.720479	0.707207	0.754767	FALSE	-2.63844	0.510174	0.576575	FALSE	3.44318	0.143164	0.186061	FALSE
PLCZ1	0	0	0	0	0	0	0	0	0	0	0	0	0	0	0	0	0	0	chr12	18836110	18890993	PLCZ1	89869	1-phosphatidylinositol -bisphosphate phosphodiesterase zeta-1 isoform x2	GO:0006816//calcium ion transport; GO:0007275//multicellular organismal development; GO:0007343//egg activation; GO:0016042//lipid catabolic process; GO:0035556//intracellular signal transduction; GO:0043647//inositol phosphate metabolic process	GO:0005634//nucleus; GO:0005829//cytosol; GO:0048471//perinuclear region of cytoplasm	GO:0004435//phosphatidylinositol phospholipase C activity; GO:0004871//signal transducer activity; GO:0005509//calcium ion binding	K05861 phosphatidylinositol phospholipase C, zeta [EC:3.1.4.11] | (RefSeq) PLCZ1, NYD-SP27, PLC-zeta	http://www.genome.jp/dbget-bin/www_bget?hsa:89869	-	-	-	-	-	-	-	-	-	-	-	-
AS3MT	37	0.327609	19	0.190559	40	0.368725	75	0.705973	64	0.557754	75	0.641351	24	0.226798	31	0.293476	42	0.366317	chr10	104629210	104661656	AS3MT	57412	arsenite methyltransferase	GO:0009404//toxin metabolic process; GO:0018872//arsonoacetate metabolic process; GO:0032259//methylation	GO:0005739//mitochondrion; GO:0005829//cytosol	GO:0030791//arsenite methyltransferase activity; GO:0030792//methylarsonite methyltransferase activity	K07755 arsenite methyltransferase [EC:2.1.1.137] | (RefSeq) AS3MT, CYT19; arsenite methyltransferase	http://www.genome.jp/dbget-bin/www_bget?hsa:57412	0.966878	8.46246e-05	0.000170043	FALSE	0.0620787	0.884412	0.921754	FALSE	0.90138	0.000126546	0.000249857	FALSE
KNDC1	21	0.132999	7	0.0502168	2	0.0131871	50	0.336645	67	0.417651	62	0.37923	20	0.135187	11	0.0744867	16	0.0998169	chr10	134973958	135039916	KNDC1	85442	protein very kind	GO:0001934//positive regulation of protein phosphorylation; GO:0007264//small GTPase mediated signal transduction; GO:0021707//cerebellar granule cell differentiation; GO:0043547//positive regulation of GTPase activity; GO:0048814//regulation of dendrite morphogenesis	GO:0030425//dendrite; GO:0032045//guanyl-nucleotide exchange factor complex; GO:0043025//neuronal cell body	GO:0005088//Ras guanyl-nucleotide exchange factor activity	no KO assigned | (RefSeq) KNDC1, C10orf23, RASGEF2, Very-KIND, bB439H18.3, v-KIND; kinase non-cataly	http://www.genome.jp/dbget-bin/www_bget?hsa:85442	2.37765	1.70451e-08	4.42529e-08	UP	0.703152	0.201639	0.261267	FALSE	1.67652	1.3416e-09	3.76161e-09	UP
LOC100506388	2	0.0429569	1	0.0243289	0	0	4	0.0913345	1	0.0211403	0	0	0	0	1	0.0229646	0	0	chr17	180996	183279	-	-	-	-	-	-	-	-	0.506419	0.748868	0.793504	FALSE	-1.25658	0.639814	0.703681	FALSE	1.77557	0.251626	0.310517	FALSE
HMG20B	17253	237.921	15489	241.943	15818	227.095	5866	85.9969	5519	74.9095	5720	76.1807	11468	168.784	12181	179.6	12842	174.443	chr19	3572943	3579081	HMG20B	10362	swi snf-related matrix-associated actin-dependent regulator of chromatin subfamily e member 1-related	GO:0006355//regulation of transcription, DNA-templated; GO:0007049//cell cycle; GO:0007596//blood coagulation; GO:0016575//histone deacetylation; GO:0033234//negative regulation of protein sumoylation; GO:0035914//skeletal muscle cell differentiation; GO:0045666//positive regulation of neuron differentiation	GO:0005654//nucleoplasm; GO:0005694//chromosome	GO:0003677//DNA binding; GO:0004407//histone deacetylase activity; GO:0046982//protein heterodimerization activity	no KO assigned | (RefSeq) HMG20B, BRAF25, BRAF35, HMGX2, HMGXB2, PP7706, SMARCE1r, SOXL, pp8857; hig	http://www.genome.jp/dbget-bin/www_bget?hsa:10362	-1.69943	2.08696e-247	1.30277e-245	DOWN	-0.370086	2.21635e-23	1.07159e-22	FALSE	-1.33331	1.51427e-153	4.52257e-152	DOWN
GLT8D2	10	0.0995605	7	0.0789415	11	0.114017	25	0.264606	3	0.0293979	6	0.0576924	23	0.244393	19	0.202254	21	0.205949	chr12	104382761	104457955	GLT8D2	83468	glycosyltransferase 8 domain-containing protein 2 isoform x1	GO:0000271//polysaccharide biosynthetic process	GO:0005794//Golgi apparatus; GO:0016021//integral component of membrane	GO:0016757//transferase activity, transferring glycosyl groups	no KO assigned | (RefSeq) GLT8D2; glycosyltransferase 8 domain containing 2	http://www.genome.jp/dbget-bin/www_bget?hsa:83468	0.117449	0.872744	0.904891	FALSE	1.20451	0.00121939	0.00224314	UP	-1.09394	0.0553487	0.0785205	FALSE
AAGAB	2615	17.8002	2229	17.1864	2628	18.6238	2552	18.4674	2735	18.324	2684	17.6448	2239	16.2661	2138	15.5603	2504	16.7897	chr15	67493013	67547536	AAGAB	79719	alpha- and gamma-adaptin-binding protein p34 isoform x1	GO:0015031//protein transport	GO:0005654//nucleoplasm; GO:0005829//cytosol	GO:0005515//protein binding	no KO assigned | (RefSeq) AAGAB, KPPP1, PPKP1, PPKP1A, p34; alpha and gamma adaptin binding protein	http://www.genome.jp/dbget-bin/www_bget?hsa:79719	-0.101158	0.0365802	0.053966	FALSE	-0.0757937	0.11447	0.157991	FALSE	-0.0293407	0.554471	0.612419	FALSE
FBXO6	316	4.4504	259	4.13173	282	4.13475	819	12.2622	891	12.3509	845	11.4934	390	5.86207	451	6.79116	478	6.63122	chr1	11724150	11734411	FBXO6	26270	f-box only protein 6	GO:0000077//DNA damage checkpoint; GO:0000209//protein polyubiquitination; GO:0006281//DNA repair; GO:0006516//glycoprotein catabolic process; GO:0006986//response to unfolded protein; GO:0030433//ER-associated ubiquitin-dependent protein catabolic process; GO:0031146//SCF-dependent proteasomal ubiquitin-dependent protein catabolic process	GO:0005829//cytosol; GO:0019005//SCF ubiquitin ligase complex; GO:0044322//endoplasmic reticulum quality control compartment	GO:0001948//glycoprotein binding; GO:0030246//carbohydrate binding; GO:0061630//ubiquitin protein ligase activity	K10100 F-box protein 6 | (RefSeq) FBXO6, FBG2, FBS2, FBX6, Fbx6b; F-box protein 6	http://www.genome.jp/dbget-bin/www_bget?hsa:26270	1.38121	3.22046e-61	3.54691e-60	UP	0.665497	6.03529e-11	1.83698e-10	FALSE	0.711951	2.37276e-17	9.5123e-17	FALSE
DYNC1I1	4	0.0305505	10	0.0865123	7	0.0556601	14	0.113673	13	0.0977257	12	0.0885155	10	0.0815139	16	0.130657	7	0.0526634	chr7	95401818	95739634	DYNC1I1	1780	cytoplasmic dynein 1 intermediate chain 1 isoform x1	GO:0006888//ER to Golgi vesicle-mediated transport; GO:0019886//antigen processing and presentation of exogenous peptide antigen via MHC class II; GO:0047496//vesicle transport along microtubule	GO:0000777//condensed chromosome kinetochore; GO:0000922//spindle pole; GO:0005634//nucleus; GO:0005829//cytosol; GO:0005868//cytoplasmic dynein complex; GO:0005874//microtubule; GO:0036464//cytoplasmic ribonucleoprotein granule; GO:0048471//perinuclear region of cytoplasm; GO:0055037//recycling endosome	GO:0003777//microtubule motor activity; GO:0008017//microtubule binding; GO:0030507//spectrin binding	K10415 dynein intermediate chain, cytosolic | (RefSeq) DYNC1I1, DNCI1, DNCIC1; dynein cytoplasmic 1	http://www.genome.jp/dbget-bin/www_bget?hsa:1780	0.682396	0.165309	0.213053	FALSE	0.681556	0.221666	0.284535	FALSE	-0.00594155	1	1	FALSE
C4orf19	2	0.0120152	4	0.0272195	5	0.0312722	4	0.0255465	4	0.023652	0	0	0	0	0	0	2	0.0118354	chr4	37455552	37595132	C4orf19	55286	uncharacterized protein c4orf19 homolog	-	GO:0005654//nucleoplasm; GO:0030054//cell junction	GO:0005515//protein binding	no KO assigned | (RefSeq) C4orf19; chromosome 4 open reading frame 19	http://www.genome.jp/dbget-bin/www_bget?hsa:55286	-0.628063	0.580989	0.638221	FALSE	-2.23243	0.0418067	0.0624585	FALSE	1.61501	0.151191	0.195581	FALSE
C3orf79	0	0	0	0	2	0.0784177	0	0	0	0	1	0.0363727	0	0	0	0	0	0	chr3	153202284	153220486	C3orf79	-	Putative uncharacterized protein C3orf79	-	-	-	-	-	-0.943494	1	1	FALSE	-2.64378	0.510174	0.576575	FALSE	-	-	-	-
SLC7A6OS	281	3.76798	270	4.10097	286	3.99261	493	7.02784	514	6.78381	516	6.6824	219	3.13416	193	2.76704	238	3.14364	chr16	68334518	68344868	SLC7A6OS	84138	probable rna polymerase ii nuclear localization protein slc7a6os	GO:0002244//hematopoietic progenitor cell differentiation; GO:0015031//protein transport	GO:0005634//nucleus; GO:0005737//cytoplasm	-	no KO assigned | (RefSeq) SLC7A6OS; solute carrier family 7 member 6 opposite strand	http://www.genome.jp/dbget-bin/www_bget?hsa:84138	0.666761	2.97453e-13	9.83775e-13	FALSE	-0.324093	0.00469422	0.00805961	FALSE	0.986379	2.62885e-23	1.28265e-22	FALSE
SYNJ2	37779	111.956	33096	111.095	36329	112.083	15118	47.6282	16527	48.2058	16751	47.9422	27466	86.8694	26457	83.8289	29623	86.4728	chr6	158402888	158520208	SYNJ2	8871	synaptojanin-2 isoform x1	GO:0036092//phosphatidylinositol-3-phosphate biosynthetic process; GO:0046856//phosphatidylinositol dephosphorylation	GO:0005829//cytosol; GO:0005856//cytoskeleton; GO:0005886//plasma membrane; GO:0030424//axon; GO:0045121//membrane raft	GO:0000166//nucleotide binding; GO:0003723//RNA binding; GO:0004438//phosphatidylinositol-3-phosphatase activity; GO:0004439//phosphatidylinositol-4,5-bisphosphate 5-phosphatase activity; GO:0005515//protein binding; GO:0034596//phosphatidylinositol phosphate 4-phosphatase activity; GO:0043813//phosphatidylinositol-3,5-bisphosphate 5-phosphatase activity; GO:0052629//phosphatidylinositol-3,5-bisp…	K20279 synaptojanin [EC:3.1.3.36] | (RefSeq) SYNJ2, INPP5H; synaptojanin 2	http://www.genome.jp/dbget-bin/www_bget?hsa:8871	-1.34363	0	0	DOWN	-0.316851	1.96662e-28	1.09427e-27	FALSE	-1.03084	9.32555e-216	4.38998e-214	DOWN
CDH26	9	0.0917797	30	0.346534	25	0.265419	31	0.336077	44	0.441636	54	0.531837	14	0.152372	6	0.0654201	6	0.0602711	chr20	58533471	58588168	CDH26	60437	cadherin-like protein 26 isoform x1	GO:0007156//homophilic cell adhesion via plasma membrane adhesion molecules	GO:0005886//plasma membrane; GO:0016021//integral component of membrane	GO:0005509//calcium ion binding	K22658 cadherin 26 | (RefSeq) CDH26, VR20; cadherin 26	http://www.genome.jp/dbget-bin/www_bget?hsa:60437	0.783499	0.0497463	0.0713366	FALSE	-1.26335	0.0231057	0.0360677	DOWN	2.04284	6.02691e-08	1.53165e-07	UP
C3orf70	52	0.192487	33	0.138367	25	0.0963444	70	0.275466	86	0.313332	87	0.311027	28	0.110619	30	0.118734	20	0.0729258	chr3	184795838	184870802	C3orf70	285382	UPF0524 protein C3orf70	-	-	-	no KO assigned | (RefSeq) C3orf70; chromosome 3 open reading frame 70	http://www.genome.jp/dbget-bin/www_bget?hsa:285382	0.947102	9.71712e-05	0.000193735	FALSE	-0.43907	0.201104	0.260655	FALSE	1.38723	2.87166e-09	7.88765e-09	UP
CEP70	345	3.17842	355	3.7046	376	3.60635	140	1.37117	204	1.84982	149	1.32574	230	2.26149	172	1.69425	159	1.44292	chr3	138213181	138313225	CEP70	80321	centrosomal protein of 70 kda isoform x2	GO:0000086//G2/M transition of mitotic cell cycle	GO:0005654//nucleoplasm; GO:0005813//centrosome; GO:0005829//cytosol; GO:0031965//nuclear membrane	GO:0005515//protein binding	K16802 centrosomal protein CEP70 | (RefSeq) CEP70, BITE; centrosomal protein 70	http://www.genome.jp/dbget-bin/www_bget?hsa:80321	-1.32621	9.4435e-21	4.20078e-20	DOWN	-0.894582	8.70816e-09	2.36188e-08	FALSE	-0.436932	0.0235093	0.0357158	FALSE
SHOX2	2863	19.7718	2503	19.5797	2604	18.7221	1698	12.4662	1851	12.5817	1984	13.2326	3274	24.1311	3168	23.3919	3477	23.6528	chr3	157813800	157823952	SHOX2	6474	short stature homeobox protein 2 isoform x2	GO:0000122//negative regulation of transcription from RNA polymerase II promoter; GO:0001649//osteoblast differentiation; GO:0002053//positive regulation of mesenchymal cell proliferation; GO:0002063//chondrocyte development; GO:0003170//heart valve development; GO:0003209//cardiac atrium morphogenesis; GO:0032330//regulation of chondrocyte differentiation; GO:0035115//embryonic forelimb morphoge…	GO:0005634//nucleus	GO:0043565//sequence-specific DNA binding	K09331 short stature homeobox protein | (RefSeq) SHOX2, OG12, OG12X, SHOT; short stature homeobox 2	http://www.genome.jp/dbget-bin/www_bget?hsa:6474	-0.723556	9.01687e-49	8.04527e-48	FALSE	0.358765	3.21802e-19	1.3623e-18	FALSE	-1.08628	3.34458e-123	7.36241e-122	DOWN
OR2T11	0	0	0	0	0	0	0	0	0	0	0	0	0	0	0	0	0	0	chr1	248789479	248790429	OR2T11	127077	olfactory receptor 2t11	GO:0007186//G-protein coupled receptor signaling pathway; GO:0050911//detection of chemical stimulus involved in sensory perception of smell	GO:0005886//plasma membrane; GO:0016021//integral component of membrane	GO:0004930//G-protein coupled receptor activity; GO:0004984//olfactory receptor activity	K04257 olfactory receptor | (RefSeq) OR2T11, OR2T11Q; olfactory receptor family 2 subfamily T member	http://www.genome.jp/dbget-bin/www_bget?hsa:127077	-	-	-	-	-	-	-	-	-	-	-	-
CHFR	2030	13.8874	1895	14.6843	2157	15.3625	2722	19.7963	2996	20.1732	3099	20.4751	3751	27.3871	3623	26.5002	3774	25.432	chr12	133416938	133464204	CHFR	55743	e3 ubiquitin-protein ligase chfr	GO:0000209//protein polyubiquitination; GO:0007067//mitotic nuclear division; GO:0007093//mitotic cell cycle checkpoint; GO:0031398//positive regulation of protein ubiquitination; GO:0031648//protein destabilization; GO:0032436//positive regulation of proteasomal ubiquitin-dependent protein catabolic process; GO:0051301//cell division	GO:0016605//PML body	GO:0000166//nucleotide binding; GO:0005515//protein binding; GO:0008270//zinc ion binding; GO:0016874//ligase activity; GO:0061630//ubiquitin protein ligase activity	K10644 E3 ubiquitin-protein ligase CHFR [EC:2.3.2.27] | (RefSeq) CHFR, RNF116, RNF196; checkpoint wi	http://www.genome.jp/dbget-bin/www_bget?hsa:55743	0.337928	2.72402e-11	8.23486e-11	FALSE	0.917432	1.72952e-80	2.5577e-79	FALSE	-0.583524	8.43384e-40	6.36999e-39	FALSE
KIAA0430	7777	21.8999	6752	21.5369	7446	21.8294	7454	22.3147	8370	23.1987	8565	23.2937	5448	16.3735	5379	16.1952	5994	16.6265	chr16	15688226	15737023	KIAA0430	9665	meiosis arrest female protein 1 isoform x1	GO:0006302//double-strand break repair; GO:0007143//female meiotic division; GO:0010468//regulation of gene expression; GO:0010923//negative regulation of phosphatase activity; GO:0048477//oogenesis	GO:0005777//peroxisome; GO:0016020//membrane	GO:0000166//nucleotide binding; GO:0003723//RNA binding	K17573 meiosis arrest female protein 1 | (RefSeq) MARF1, KIAA0430, LKAP, LMKB, PPP1R34; meiosis regu	http://www.genome.jp/dbget-bin/www_bget?hsa:9665	-0.0463795	0.196901	0.250355	FALSE	-0.342538	1.80784e-27	9.80347e-27	FALSE	0.292134	9.64826e-15	3.46131e-14	FALSE
SYPL1	1671	15.7466	1369	14.6128	1646	16.1484	3428	34.3418	3953	36.6644	4063	36.9775	1746	17.5602	1793	18.0653	1845	17.1262	chr7	105730814	105753093	SYPL1	6856	synaptophysin-like protein 1	GO:0006810//transport; GO:0007268//synaptic transmission	GO:0005887//integral component of plasma membrane; GO:0030141//secretory granule; GO:0030285//integral component of synaptic vesicle membrane; GO:0042470//melanosome; GO:0070062//extracellular exosome	GO:0005215//transporter activity	no KO assigned | (RefSeq) SYPL1, H-SP1, SYPL; synaptophysin like 1	http://www.genome.jp/dbget-bin/www_bget?hsa:6856	1.09218	1.66012e-95	2.95624e-94	UP	0.246017	2.18979e-06	5.08111e-06	FALSE	0.842142	2.46987e-66	2.84177e-65	FALSE
TIGD1	352	2.93359	255	2.40723	281	2.4381	312	2.76429	334	2.73975	299	2.40662	197	1.75225	178	1.58611	159	1.30529	chr2	233412680	233415300	TIGD1	200765	tigger transposable element-derived protein 1	-	GO:0005634//nucleus	GO:0003677//DNA binding	no KO assigned | (RefSeq) TIGD1, EEYORE; tigger transposable element derived 1	http://www.genome.jp/dbget-bin/www_bget?hsa:200765	-0.1009	0.399086	0.469625	FALSE	-0.681785	1.55342e-06	3.64311e-06	FALSE	0.578065	1.49401e-05	3.19121e-05	FALSE
SYPL2	440	2.54331	332	2.17373	450	2.70799	121	0.74354	115	0.654263	116	0.647568	222	1.36954	215	1.32874	208	1.1843	chr1	110009100	110024764	SYPL2	284612	synaptophysin-like protein 2	GO:0006810//transport; GO:0006874//cellular calcium ion homeostasis; GO:0021762//substantia nigra development	GO:0030285//integral component of synaptic vesicle membrane	GO:0005215//transporter activity	no KO assigned | (RefSeq) SYPL2, MG29; synaptophysin like 2	http://www.genome.jp/dbget-bin/www_bget?hsa:284612	-1.98485	3.211e-52	3.03128e-51	DOWN	-0.872259	2.81098e-13	9.48259e-13	FALSE	-1.11652	3.4798e-16	1.32859e-15	DOWN
RFX8	2376	30.0176	2031	29.0642	2318	30.4881	3030	40.6952	3336	41.4823	3385	41.3017	1268	17.0971	1176	15.8852	1140	14.1869	chr2	102013823	102091165	RFX8	731220	dna-binding protein rfx8	GO:0006357//regulation of transcription from RNA polymerase II promoter; GO:0031018//endocrine pancreas development	GO:0005634//nucleus	GO:0000978//RNA polymerase II core promoter proximal region sequence-specific DNA binding; GO:0003700//transcription factor activity, sequence-specific DNA binding	no KO assigned | (RefSeq) RFX8; RFX family member 8, lacking RFX DNA binding domain	http://www.genome.jp/dbget-bin/www_bget?hsa:731220	0.340281	1.34969e-14	4.70973e-14	FALSE	-0.861115	1.48926e-44	1.21873e-43	FALSE	1.19742	2.58085e-83	3.79732e-82	UP
NPR3	67	0.206362	67	0.233749	95	0.304626	47	0.153895	47	0.142482	56	0.16658	36	0.11834	38	0.125139	41	0.124392	chr5	32710743	32791830	NPR3	4883	atrial natriuretic peptide receptor 3 isoform x3	GO:0001501//skeletal system development; GO:0002158//osteoclast proliferation; GO:0006171//cAMP biosynthetic process; GO:0007189//adenylate cyclase-activating G-protein coupled receptor signaling pathway; GO:0007193//adenylate cyclase-inhibiting G-protein coupled receptor signaling pathway; GO:0007200//phospholipase C-activating G-protein coupled receptor signaling pathway; GO:0008217//regulation…	GO:0005622//intracellular; GO:0005887//integral component of plasma membrane; GO:0070062//extracellular exosome	GO:0004016//adenylate cyclase activity; GO:0008528//G-protein coupled peptide receptor activity; GO:0016941//natriuretic peptide receptor activity; GO:0017046//peptide hormone binding; GO:0042803//protein homodimerization activity	K12325 atrial natriuretic peptide clearance receptor | (RefSeq) NPR3, ANP-C, ANPR-C, ANPRC, C5orf23,	http://www.genome.jp/dbget-bin/www_bget?hsa:4883	-0.806145	0.000213335	0.000412691	FALSE	-0.949577	3.92383e-05	8.26549e-05	FALSE	0.139415	0.547881	0.606402	FALSE
RCOR2	105	0.88079	63	0.598609	89	0.777251	57	0.508311	41	0.338512	49	0.396971	55	0.492402	48	0.430507	38	0.313993	chr11	63678693	63684316	RCOR2	283248	rest corepressor 2 isoform x1	GO:0000122//negative regulation of transcription from RNA polymerase II promoter	GO:0000785//chromatin; GO:0005634//nucleus; GO:0005667//transcription factor complex; GO:0017053//transcriptional repressor complex	GO:0003700//transcription factor activity, sequence-specific DNA binding; GO:0003714//transcription corepressor activity; GO:0008134//transcription factor binding; GO:0019899//enzyme binding; GO:0044212//transcription regulatory region DNA binding	no KO assigned | (RefSeq) RCOR2; REST corepressor 2	http://www.genome.jp/dbget-bin/www_bget?hsa:283248	-0.988483	1.3458e-05	2.87353e-05	FALSE	-0.808314	0.000577904	0.00109956	FALSE	-0.183305	0.473892	0.546804	FALSE
RFX4	0	0	0	0	0	0	0	0	0	0	0	0	0	0	2	0.0126895	0	0	chr12	106976685	107156582	RFX4	5992	transcription factor rfx4 isoform x2	GO:0021516//dorsal spinal cord development; GO:0021537//telencephalon development; GO:0021696//cerebellar cortex morphogenesis; GO:0021914//negative regulation of smoothened signaling pathway involved in ventral spinal cord patterning; GO:0030901//midbrain development; GO:0045944//positive regulation of transcription from RNA polymerase II promoter; GO:0060271//cilium morphogenesis; GO:0070613//r…	GO:0005634//nucleus	GO:0000978//RNA polymerase II core promoter proximal region sequence-specific DNA binding; GO:0001077//transcriptional activator activity, RNA polymerase II core promoter proximal region sequence-specific binding; GO:0003682//chromatin binding; GO:0005515//protein binding	K09174 regulatory factor X 4 | (RefSeq) RFX4, NYD-SP10; regulatory factor X4	http://www.genome.jp/dbget-bin/www_bget?hsa:5992	-	-	-	-	2.6848	0.510174	0.576575	FALSE	-2.77441	0.511973	0.570784	FALSE
RFX5	2528	15.2754	2216	15.1672	2597	16.3371	2279	14.6397	2386	14.1904	2328	13.5856	3664	23.629	3647	23.5617	3970	23.6298	chr1	151313116	151319769	RFX5	5993	dna-binding protein rfx5 isoform x1	GO:0000122//negative regulation of transcription from RNA polymerase II promoter	GO:0005634//nucleus	GO:0000978//RNA polymerase II core promoter proximal region sequence-specific DNA binding; GO:0003700//transcription factor activity, sequence-specific DNA binding; GO:0005515//protein binding	K08061 regulatory factor X 5 | (RefSeq) RFX5; regulatory factor X5	http://www.genome.jp/dbget-bin/www_bget?hsa:5993	-0.264528	2.23079e-07	5.38733e-07	FALSE	0.663303	2.82581e-59	3.00594e-58	FALSE	-0.931969	3.90259e-98	6.91559e-97	FALSE
RFX6	0	0	0	0	0	0	0	0	4	0.024522	1	0.00601545	0	0	0	0	0	0	chr6	117198376	117253326	RFX6	222546	dna-binding protein rfx6	GO:0003309//type B pancreatic cell differentiation; GO:0003310//pancreatic A cell differentiation; GO:0003311//pancreatic D cell differentiation; GO:0035774//positive regulation of insulin secretion involved in cellular response to glucose stimulus; GO:0045944//positive regulation of transcription from RNA polymerase II promoter; GO:0090104//pancreatic epsilon cell differentiation	GO:0005634//nucleus	GO:0000978//RNA polymerase II core promoter proximal region sequence-specific DNA binding; GO:0001228//transcriptional activator activity, RNA polymerase II transcription regulatory region sequence-specific binding; GO:0005515//protein binding	K19521 regulatory factor X 6 | (RefSeq) RFX6, MTCHRS, MTFS, RFXDC1, dJ955L16.1; regulatory factor X6	http://www.genome.jp/dbget-bin/www_bget?hsa:222546	3.74825	0.0769594	0.106558	FALSE	-	-	-	-	3.72774	0.0779789	0.107441	FALSE
RFX7	1762	5.34932	1383	4.75593	1664	5.25938	1713	5.52869	1915	5.72229	2001	5.86706	2345	7.59819	1958	6.35567	2367	7.07855	chr15	56382731	56535483	RFX7	64864	dna-binding protein rfx7	GO:0006357//regulation of transcription from RNA polymerase II promoter	GO:0005634//nucleus	GO:0000978//RNA polymerase II core promoter proximal region sequence-specific DNA binding; GO:0003700//transcription factor activity, sequence-specific DNA binding	no KO assigned | (RefSeq) RFX7, RFXDC2; regulatory factor X7	http://www.genome.jp/dbget-bin/www_bget?hsa:64864	0.0327478	0.571061	0.628293	FALSE	0.517724	5.34422e-15	1.92159e-14	FALSE	-0.488764	2.92559e-14	1.02447e-13	FALSE
NRXN3	10	0.0225192	20	0.0510155	14	0.0328222	2	0.004788	2	0.00443292	12	0.0260984	10	0.024034	2	0.00481546	20	0.0443645	chr14	78636716	80334633	NRXN3	9378	neurexin 3 isoform x14	GO:0001525//angiogenesis; GO:0007158//neuron cell-cell adhesion; GO:0007165//signal transduction; GO:0007269//neurotransmitter secretion; GO:0007411//axon guidance; GO:0007612//learning; GO:0030534//adult behavior; GO:0035176//social behavior; GO:0051965//positive regulation of synapse assembly; GO:0071625//vocalization behavior; GO:0090129//positive regulation of synapse maturation	GO:0005887//integral component of plasma membrane; GO:0043234//protein complex; GO:0098793//presynapse	GO:0004888//transmembrane signaling receptor activity; GO:0005246//calcium channel regulator activity; GO:0046872//metal ion binding; GO:0050839//cell adhesion molecule binding; GO:0097109//neuroligin family protein binding	K07377 neurexin | (RefSeq) NRXN1, Hs.22998, PTHSL2, SCZD17; neurexin 1	http://www.genome.jp/dbget-bin/www_bget?hsa:9378	-1.66242	0.00579667	0.00959889	DOWN	-0.4486	0.432999	0.514571	FALSE	-1.21702	0.0584352	0.0825614	FALSE
NRXN2	2	0.00790861	0	0	4	0.0164671	12	0.0504456	11	0.0428125	9	0.0343711	2	0.00844062	0	0	6	0.0233709	chr11	64373646	64490660	NRXN2	9379	neurexin-2-beta isoform x3	GO:0007158//neuron cell-cell adhesion; GO:0007165//signal transduction; GO:0007269//neurotransmitter secretion; GO:0030534//adult behavior; GO:0035176//social behavior; GO:0042297//vocal learning; GO:0071625//vocalization behavior; GO:0097116//gephyrin clustering involved in postsynaptic density assembly; GO:0097118//neuroligin clustering involved in postsynaptic membrane assembly; GO:0097119//po…	GO:0016021//integral component of membrane; GO:0042734//presynaptic membrane; GO:0043234//protein complex	GO:0004888//transmembrane signaling receptor activity; GO:0005246//calcium channel regulator activity; GO:0046872//metal ion binding; GO:0050839//cell adhesion molecule binding; GO:0097109//neuroligin family protein binding	K07377 neurexin | (RefSeq) NRXN2; neurexin 2	http://www.genome.jp/dbget-bin/www_bget?hsa:9379	2.16308	0.000669387	0.00123261	UP	0.430482	0.815842	0.861514	FALSE	1.72777	0.00886059	0.0142295	UP
RFX2	3214	17.2283	2804	17.0253	3180	17.7465	2149	12.2463	2301	12.1401	2489	12.8855	2487	14.2281	2480	14.2136	2872	15.1647	chr19	5993175	6110664	RFX2	5990	dna-binding protein rfx2 isoform x2	GO:0001675//acrosome assembly; GO:0006357//regulation of transcription from RNA polymerase II promoter; GO:0030030//cell projection organization	GO:0005634//nucleus; GO:0005737//cytoplasm	GO:0000978//RNA polymerase II core promoter proximal region sequence-specific DNA binding; GO:0003700//transcription factor activity, sequence-specific DNA binding	K09173 regulatory factor X 1/2/3 | (RefSeq) RFX2; regulatory factor X2	http://www.genome.jp/dbget-bin/www_bget?hsa:5990	-0.60299	4.43623e-39	3.20306e-38	FALSE	-0.18839	9.75068e-06	2.15663e-05	FALSE	-0.418582	3.23821e-17	1.28937e-16	FALSE
RFX3	908	3.43803	814	3.49114	902	3.55564	739	2.97468	801	2.98513	877	3.20703	738	2.98232	834	3.37633	758	2.82713	chr9	3218297	3526001	RFX3	5991	transcription factor rfx3 isoform x1	GO:0045892//negative regulation of transcription, DNA-templated; GO:0045944//positive regulation of transcription from RNA polymerase II promoter; GO:0050796//regulation of insulin secretion; GO:0060285//cilium-dependent cell motility; GO:0060287//epithelial cilium movement involved in determination of left/right asymmetry; GO:0072560//type B pancreatic cell maturation; GO:2000078//positive regul…	GO:0000790//nuclear chromatin; GO:0005667//transcription factor complex	GO:0000978//RNA polymerase II core promoter proximal region sequence-specific DNA binding; GO:0003705//transcription factor activity, RNA polymerase II distal enhancer sequence-specific binding; GO:0005515//protein binding	K09173 regulatory factor X 1/2/3 | (RefSeq) RFX3; regulatory factor X3	http://www.genome.jp/dbget-bin/www_bget?hsa:5991	-0.315823	3.41278e-06	7.60959e-06	FALSE	-0.126356	0.103204	0.143622	FALSE	-0.193876	0.0189753	0.0291878	FALSE
YDJC	593	9.68105	516	9.54196	582	9.89188	822	14.2663	794	12.7584	742	11.6991	531	9.25201	510	8.90212	514	8.26578	chr22	21982378	21984340	YDJC	150223	carbohydrate deacetylase	GO:0005975//carbohydrate metabolic process	-	GO:0000287//magnesium ion binding; GO:0016810//hydrolase activity, acting on carbon-nitrogen (but not peptide) bonds	no KO assigned | (RefSeq) YDJC; YdjC chitooligosaccharide deacetylase homolog	http://www.genome.jp/dbget-bin/www_bget?hsa:150223	0.287279	0.000868738	0.00158111	FALSE	-0.0760061	0.354142	0.43101	FALSE	0.359226	9.55405e-05	0.000190967	FALSE
RFPL2	9	0.114966	6	0.0868159	9	0.11969	7	0.09506	4	0.0502916	3	0.0370109	8	0.109067	17	0.232184	6	0.0754974	chr22	32586422	32600718	RFPL2	10739	ret finger 3	-	-	GO:0005515//protein binding; GO:0008270//zinc ion binding	no KO assigned | (RefSeq) RFPL2, RNF79; ret finger protein like 2	http://www.genome.jp/dbget-bin/www_bget?hsa:10739	-0.94628	0.122799	0.164402	FALSE	0.419198	0.411478	0.491511	FALSE	-1.36696	0.0318723	0.0473212	DOWN
MYADML2	15	0.133627	7	0.0706353	12	0.111294	29	0.274646	36	0.315656	30	0.25811	16	0.152124	12	0.114298	20	0.175504	chr17	79897521	79905109	MYADML2	255275	myeloid-associated differentiation marker-like protein 2	-	GO:0005737//cytoplasm; GO:0016021//integral component of membrane	-	no KO assigned | (RefSeq) MYADML2; myeloid associated differentiation marker like 2	http://www.genome.jp/dbget-bin/www_bget?hsa:255275	1.28175	0.000173151	0.000338089	UP	0.538574	0.202006	0.261682	FALSE	0.739542	0.0154773	0.0240642	FALSE
VPS37D	83	1.12961	58	0.894122	85	1.20436	55	0.795763	108	1.44671	50	0.657202	61	0.886039	62	0.902186	110	1.47467	chr7	73082174	73086440	VPS37D	155382	vacuolar protein sorting-associated protein 37d	GO:0006914//autophagy; GO:0015031//protein transport; GO:0016197//endosomal transport; GO:0036258//multivesicular body assembly; GO:0039702//viral budding via host ESCRT complex; GO:0075733//intracellular transport of virus	GO:0000813//ESCRT I complex; GO:0031902//late endosome membrane; GO:0070062//extracellular exosome	-	K12185 ESCRT-I complex subunit VPS37 | (RefSeq) VPS37D, WBSCR24; VPS37D subunit of ESCRT-I	http://www.genome.jp/dbget-bin/www_bget?hsa:155382	-0.277073	0.34508	0.41256	FALSE	0.0828481	0.748787	0.801851	FALSE	-0.362622	0.259181	0.319098	FALSE
NLRP13	0	0	0	0	0	0	0	0	0	0	0	0	0	0	0	0	0	0	chr19	56403058	56443702	NLRP13	126204	lrr and pyd domains-containing protein 13	-	-	GO:0005524//ATP binding	K22665 NACHT, LRR and PYD domains-containing protein 13 | (RefSeq) NLRP13, CLR19.7, NALP13, NOD14, P	http://www.genome.jp/dbget-bin/www_bget?hsa:126204	-	-	-	-	-	-	-	-	-	-	-	-
STXBP5	4287	10.0714	3834	10.2025	4451	10.8863	3095	7.72978	3340	7.72305	3713	8.42441	3439	8.62265	3362	8.44477	3572	8.26607	chr6	147525494	147711612	STXBP5	134957	syntaxin-binding protein 5 isoform x1	GO:0010468//regulation of gene expression; GO:0030193//regulation of blood coagulation; GO:0043547//positive regulation of GTPase activity; GO:0045921//positive regulation of exocytosis; GO:0050708//regulation of protein secretion	GO:0005892//acetylcholine-gated channel complex; GO:0008021//synaptic vesicle; GO:0030054//cell junction; GO:0030141//secretory granule; GO:0030659//cytoplasmic vesicle membrane; GO:0031201//SNARE complex	GO:0005096//GTPase activator activity; GO:0017075//syntaxin-1 binding; GO:0017137//Rab GTPase binding	K08518 syntaxin-binding protein 5 | (RefSeq) STXBP5, LGL3, LLGL3, Nbla04300; syntaxin binding protei	http://www.genome.jp/dbget-bin/www_bget?hsa:134957	-0.506535	2.84716e-26	1.49396e-25	FALSE	-0.233704	1.40015e-08	3.74869e-08	FALSE	-0.276959	2.38415e-09	6.58053e-09	FALSE
TMEM179B	1195	25.0269	1188	28.1823	1277	27.8432	1464	32.5951	1660	34.2181	1485	30.0363	1572	35.1371	1514	33.9017	1713	35.3387	chr11	62554874	62557872	TMEM179B	374395	transmembrane protein 179b	-	GO:0016021//integral component of membrane	-	no KO assigned | (RefSeq) TMEM179B; transmembrane protein 179B	http://www.genome.jp/dbget-bin/www_bget?hsa:374395	0.1346	0.0521023	0.0745046	FALSE	0.430958	4.43758e-13	1.48309e-12	FALSE	-0.300216	9.24122e-07	2.17424e-06	FALSE
ABCE1	6301	32.8253	5533	32.6497	5891	31.9504	5263	29.1477	5681	29.1294	5940	29.8858	5417	30.1184	5410	30.1337	5654	29.014	chr4	146019156	146050676	ABCE1	6059	atp-binding cassette sub-family e member 1	GO:0000054//ribosomal subunit export from nucleus; GO:0006401//RNA catabolic process; GO:0006413//translational initiation; GO:0006415//translational termination; GO:0009615//response to virus; GO:0016032//viral process; GO:0055085//transmembrane transport; GO:0060702//negative regulation of endoribonuclease activity	GO:0005759//mitochondrial matrix; GO:0005852//eukaryotic translation initiation factor 3 complex; GO:0016020//membrane	GO:0005506//iron ion binding; GO:0005515//protein binding; GO:0005524//ATP binding; GO:0016887//ATPase activity; GO:0043024//ribosomal small subunit binding; GO:0060698//endoribonuclease inhibitor activity	K06174 ATP-binding cassette, sub-family E, member 1 | (RefSeq) ABCE1, ABC38, OABP, RLI, RLI1, RNASEL	http://www.genome.jp/dbget-bin/www_bget?hsa:6059	-0.266752	1.87085e-13	6.24244e-13	FALSE	-0.0611488	0.0735454	0.105617	FALSE	-0.209684	4.28372e-08	1.09784e-07	FALSE
UQCRC2	6873	67.9018	6048	67.681	6580	67.6783	7302	76.6918	7333	71.3058	7810	74.5189	4713	49.6943	4791	50.6077	4935	48.0259	chr16	21964385	21994981	UQCRC2	7385	cytochrome b-c1 complex subunit mitochondrial	GO:0006122//mitochondrial electron transport, ubiquinol to cytochrome c; GO:0009060//aerobic respiration; GO:0016485//protein processing	GO:0005654//nucleoplasm; GO:0005750//mitochondrial respiratory chain complex III; GO:0043209//myelin sheath; GO:0070062//extracellular exosome	GO:0004222//metalloendopeptidase activity; GO:0008270//zinc ion binding; GO:0032403//protein complex binding	K00415 ubiquinol-cytochrome c reductase core subunit 2 | (RefSeq) UQCRC2, MC3DN5, QCR2, UQCR2; ubiqu	http://www.genome.jp/dbget-bin/www_bget?hsa:7385	0.00761205	0.841167	0.877151	FALSE	-0.389583	9.08663e-30	5.22011e-29	FALSE	0.393116	3.76561e-21	1.71104e-20	FALSE
XPNPEP1	2141	18.5953	2018	19.853	2205	19.938	1680	15.512	1798	15.3703	1914	16.0549	3098	28.7171	3050	28.3231	3174	27.1548	chr10	111624524	111683311	XPNPEP1	7511	xaa-pro aminopeptidase 1 isoform x3	GO:0006508//proteolysis; GO:0010815//bradykinin catabolic process	GO:0005737//cytoplasm; GO:0070062//extracellular exosome	GO:0030145//manganese ion binding; GO:0042803//protein homodimerization activity; GO:0070006//metalloaminopeptidase activity	K01262 Xaa-Pro aminopeptidase [EC:3.4.11.9] | (RefSeq) XPNPEP1, APP1, SAMP, XPNPEP, XPNPEPL, XPNPEPL	http://www.genome.jp/dbget-bin/www_bget?hsa:7511	-0.437098	4.4321e-17	1.71613e-16	FALSE	0.593381	5.52476e-37	3.79033e-36	FALSE	-1.0345	2.20932e-104	4.16243e-103	DOWN
XPNPEP2	7	0.0458761	23	0.17074	23	0.156929	5	0.0348362	8	0.0516044	8	0.0506359	6	0.0419676	20	0.140144	8	0.0516454	chrX	128872946	128903525	XPNPEP2	7512	xaa-pro aminopeptidase 2	GO:0006508//proteolysis	GO:0005886//plasma membrane; GO:0031225//anchored component of membrane; GO:0070062//extracellular exosome	GO:0004177//aminopeptidase activity; GO:0008237//metallopeptidase activity; GO:0046872//metal ion binding	K14208 Xaa-Pro aminopeptidase 2 [EC:3.4.11.9] | (RefSeq) XPNPEP2, AEACEI, APP2; X-prolyl aminopeptid	http://www.genome.jp/dbget-bin/www_bget?hsa:7512	-1.53731	0.0043403	0.00730609	DOWN	-0.604752	0.280733	0.349567	FALSE	-0.937736	0.110061	0.147716	FALSE
UQCRC1	28120	379.865	24982	382.262	25479	358.331	17206	247.096	18336	243.796	17291	225.587	17284	249.191	17026	245.913	19158	254.928	chr3	48636432	48647098	UQCRC1	7384	cytochrome b-c1 complex subunit mitochondrial	GO:0006122//mitochondrial electron transport, ubiquinol to cytochrome c; GO:0009060//aerobic respiration; GO:0014823//response to activity; GO:0016485//protein processing; GO:0043279//response to alkaloid; GO:1902600//hydrogen ion transmembrane transport	GO:0005750//mitochondrial respiratory chain complex III; GO:0043209//myelin sheath	GO:0004222//metalloendopeptidase activity; GO:0008121//ubiquinol-cytochrome-c reductase activity; GO:0008270//zinc ion binding; GO:0031625//ubiquitin protein ligase binding; GO:0032403//protein complex binding	K00414 ubiquinol-cytochrome c reductase core subunit 1 | (RefSeq) UQCRC1, D3S3191, QCR1, UQCR1; ubiq	http://www.genome.jp/dbget-bin/www_bget?hsa:7384	-0.767951	8.58133e-72	1.11242e-70	FALSE	-0.513863	1.54993e-49	1.40678e-48	FALSE	-0.258063	2.14615e-10	6.26983e-10	FALSE
GGCX	2825	11.8147	2357	11.1656	2680	11.6688	1532	6.81137	1553	6.39268	1588	6.41408	1558	6.95417	1553	6.94434	1838	7.57186	chr2	85771843	85788657	GGCX	2677	vitamin k-dependent gamma-carboxylase isoform x2	GO:0007596//blood coagulation; GO:0017187//peptidyl-glutamic acid carboxylation	GO:0005789//endoplasmic reticulum membrane; GO:0016021//integral component of membrane	GO:0008488//gamma-glutamyl carboxylase activity	K10106 vitamin K-dependent gamma-carboxylase [EC:4.1.1.90] | (RefSeq) GGCX, VKCFD1; gamma-glutamyl c	http://www.genome.jp/dbget-bin/www_bget?hsa:2677	-0.944201	6.36734e-79	9.08998e-78	FALSE	-0.624772	1.92464e-36	1.30005e-35	FALSE	-0.3231	4.26511e-08	1.0934e-07	FALSE
PAPLN	3082	11.5396	2623	11.1244	2685	10.4662	951	3.78538	1092	4.02428	1068	3.86197	1438	5.74633	1418	5.67661	1562	5.76092	chr14	73704205	73741348	PAPLN	89932	papilin isoform x1	GO:0010951//negative regulation of endopeptidase activity	GO:0005578//proteinaceous extracellular matrix	GO:0004222//metalloendopeptidase activity; GO:0004867//serine-type endopeptidase inhibitor activity; GO:0008270//zinc ion binding	K23624 papilin | (RefSeq) PAPLN, PPN; papilin, proteoglycan like sulfated glycoprotein	http://www.genome.jp/dbget-bin/www_bget?hsa:89932	-1.62739	2.84393e-186	1.19977e-184	DOWN	-0.881754	2.87257e-71	3.76604e-70	FALSE	-0.749621	6.62979e-37	4.6384e-36	FALSE
ADNP	5774	20.106	4852	19.1377	5548	20.1128	5917	21.9039	6507	22.3017	6618	22.2564	3898	14.4865	3743	13.9355	4236	14.5297	chr20	49505455	49547750	ADNP	23394	activity-dependent neuroprotector homeobox protein isoform x1	GO:0006355//regulation of transcription, DNA-templated; GO:0007614//short-term memory; GO:0009743//response to carbohydrate; GO:0010035//response to inorganic substance; GO:0010629//negative regulation of gene expression; GO:0010835//regulation of protein ADP-ribosylation; GO:0030828//positive regulation of cGMP biosynthetic process; GO:0031668//cellular response to extracellular stimulus; GO:003…	GO:0005615//extracellular space; GO:0005634//nucleus; GO:0005737//cytoplasm; GO:0030424//axon; GO:0030425//dendrite; GO:0043025//neuronal cell body	GO:0003677//DNA binding; GO:0003682//chromatin binding; GO:0005507//copper ion binding; GO:0042277//peptide binding; GO:0048487//beta-tubulin binding	K22591 activity-dependent neuroprotector homeobox protein | (RefSeq) ADNP, ADNP1, HVDAS, MRD28; acti	http://www.genome.jp/dbget-bin/www_bget?hsa:23394	0.040262	0.278936	0.341099	FALSE	-0.401541	1.53996e-28	8.58015e-28	FALSE	0.437798	6.53286e-30	3.88723e-29	FALSE
PM20D2	291	1.349	244	1.28123	306	1.47682	393	1.93679	410	1.87073	444	1.98784	387	1.91471	395	1.95781	368	1.68043	chr6	89855769	89875288	PM20D2	135293	peptidase m20 domain-containing protein 2	GO:0006508//proteolysis; GO:0032268//regulation of cellular protein metabolic process	GO:0005654//nucleoplasm; GO:0070062//extracellular exosome	GO:0016805//dipeptidase activity	no KO assigned | (RefSeq) PM20D2, ACY1L2; peptidase M20 domain containing 2	http://www.genome.jp/dbget-bin/www_bget?hsa:135293	0.373016	0.00014724	0.000289533	FALSE	0.49828	4.51572e-06	1.02229e-05	FALSE	-0.128914	0.184087	0.234441	FALSE
ZNF57	214	2.39229	174	2.20327	190	2.21127	243	2.88787	275	3.0258	273	2.94742	114	1.36012	140	1.67334	139	1.53062	chr19	2900896	2918474	ZNF57	126295	zinc finger protein 57 isoform x1	GO:0006355//regulation of transcription, DNA-templated	GO:0005634//nucleus	GO:0003677//DNA binding; GO:0046872//metal ion binding	K09228 KRAB domain-containing zinc finger protein | (RefSeq) ZNF57, ZNF424; zinc finger protein 57	http://www.genome.jp/dbget-bin/www_bget?hsa:126295	0.257002	0.0204128	0.031339	FALSE	-0.51158	0.0002149	0.000425732	FALSE	0.764881	1.76856e-09	4.9222e-09	FALSE
STXBP6	0	0	0	0	0	0	0	0	0	0	0	0	0	0	2	0.0112826	0	0	chr14	25278860	25519503	STXBP6	29091	syntaxin-binding protein 6	GO:0006893//Golgi to plasma membrane transport; GO:0035542//regulation of SNARE complex assembly; GO:0045920//negative regulation of exocytosis; GO:0051601//exocyst localization; GO:0098609//cell-cell adhesion	GO:0000145//exocyst; GO:0005886//plasma membrane; GO:0005913//cell-cell adherens junction; GO:0016021//integral component of membrane	GO:0005546//phosphatidylinositol-4,5-bisphosphate binding; GO:0017049//GTP-Rho binding; GO:0098641//cadherin binding involved in cell-cell adhesion	K08519 syntaxin-binding protein 6 | (RefSeq) STXBP6, HSPC156, amisyn; syntaxin binding protein 6	http://www.genome.jp/dbget-bin/www_bget?hsa:29091	-	-	-	-	2.6848	0.510174	0.576575	FALSE	-2.77441	0.511973	0.570784	FALSE
KHDRBS1	6931	53.422	6039	52.7241	6695	53.7233	5756	47.1647	6331	48.0291	6399	47.6339	6573	54.0707	6721	55.3877	7367	55.933	chr1	32479295	32509483	KHDRBS1	10657	kh domain- rna- signal transduction-associated protein 1	GO:0000086//G2/M transition of mitotic cell cycle; GO:0006397//mRNA processing; GO:0007050//cell cycle arrest; GO:0007166//cell surface receptor signaling pathway; GO:0008283//cell proliferation; GO:0009967//positive regulation of signal transduction; GO:0031647//regulation of protein stability; GO:0045892//negative regulation of transcription, DNA-templated; GO:0045948//positive regulation of tr…	GO:0005654//nucleoplasm; GO:0005829//cytosol; GO:0070618//Grb2-Sos complex	GO:0003677//DNA binding; GO:0005070//SH3/SH2 adaptor activity; GO:0008143//poly(A) binding; GO:0008266//poly(U) RNA binding; GO:0017124//SH3 domain binding; GO:0032403//protein complex binding; GO:0042802//identical protein binding; GO:0044822//poly(A) RNA binding	K13198 KH domain-containing, RNA-binding, signal transduction-associated protein 1 | (RefSeq) KHDRBS	http://www.genome.jp/dbget-bin/www_bget?hsa:10657	-0.285321	4.69414e-16	1.74529e-15	FALSE	0.114255	0.000389803	0.000754087	FALSE	-0.403594	6.84496e-28	3.83905e-27	FALSE
KHDRBS3	61	0.676718	58	0.72883	79	0.912417	265	3.12533	241	2.6315	259	2.77497	47	0.556481	67	0.79471	128	1.39875	chr8	136469708	136659853	KHDRBS3	10656	kh domain- rna- signal transduction-associated protein 3 isoform x1	GO:0006355//regulation of transcription, DNA-templated; GO:0007283//spermatogenesis	GO:0005654//nucleoplasm	GO:0017124//SH3 domain binding; GO:0044822//poly(A) RNA binding	K14942 KH domain-containing, RNA-binding, signal transduction-associated protein 3 | (RefSeq) KHDRBS	http://www.genome.jp/dbget-bin/www_bget?hsa:10656	1.75435	4.32705e-29	2.45354e-28	UP	0.314772	0.32426	0.398384	FALSE	1.4343	5.04706e-09	1.36685e-08	UP
KHDRBS2	9	0.084302	16	0.16976	11	0.107269	7	0.0697052	2	0.0184388	5	0.045232	19	0.189943	35	0.350525	17	0.156855	chr6	62389865	62996132	KHDRBS2	202559	kh domain- rna- signal transduction-associated protein 2	GO:0006355//regulation of transcription, DNA-templated	GO:0005654//nucleoplasm	GO:0008143//poly(A) binding; GO:0008266//poly(U) RNA binding; GO:0017124//SH3 domain binding; GO:0042169//SH2 domain binding; GO:0046982//protein heterodimerization activity	K17843 KH domain-containing, RNA-binding, signal transduction-associated protein 2 | (RefSeq) KHDRBS	http://www.genome.jp/dbget-bin/www_bget?hsa:202559	-1.53813	0.00533238	0.00886652	DOWN	1.01275	0.0237306	0.0369848	UP	-2.55519	1.38127e-06	3.20631e-06	DOWN
BAK1	4946	49.2651	4224	47.6573	4534	47.017	8784	93.0143	9084	89.0574	9202	88.5213	5325	56.6081	5009	53.3448	5907	57.9569	chr6	33540323	33548070	BAK1	578	bcl-2 homologous antagonist killer isoform x1	GO:0001782//B cell homeostasis; GO:0001783//B cell apoptotic process; GO:0001974//blood vessel remodeling; GO:0002262//myeloid cell homeostasis; GO:0002352//B cell negative selection; GO:0006987//activation of signaling protein activity involved in unfolded protein response; GO:0007420//brain development; GO:0007568//aging; GO:0008053//mitochondrial fusion; GO:0008285//negative regulation of cell…	GO:0005783//endoplasmic reticulum; GO:0005829//cytosol; GO:0031307//integral component of mitochondrial outer membrane; GO:0046930//pore complex	GO:0031072//heat shock protein binding; GO:0042803//protein homodimerization activity; GO:0044325//ion channel binding; GO:0046872//metal ion binding; GO:0046982//protein heterodimerization activity; GO:0051087//chaperone binding; GO:0051400//BH domain binding	K14021 Bcl-2 homologous antagonist/killer | (RefSeq) BAK1, BAK, BAK-LIKE, BCL2L7, CDN1; BCL2 antagon	http://www.genome.jp/dbget-bin/www_bget?hsa:578	0.787628	8.47131e-95	1.50062e-93	FALSE	0.28757	2.28981e-13	7.76112e-13	FALSE	0.496169	6.11859e-32	3.85394e-31	FALSE
FBXO9	1991	9.52905	2057	11.1515	2118	10.5534	1278	6.50251	1355	6.38301	1453	6.71621	2711	13.8478	2604	13.3252	2963	13.9689	chr6	52929796	52965671	FBXO9	26268	low quality protein: f-box only protein 9	GO:0016567//protein ubiquitination; GO:0031146//SCF-dependent proteasomal ubiquitin-dependent protein catabolic process; GO:0032006//regulation of TOR signaling; GO:0045087//innate immune response; GO:0045444//fat cell differentiation	GO:0005737//cytoplasm; GO:0016021//integral component of membrane; GO:0019005//SCF ubiquitin ligase complex	GO:0004842//ubiquitin-protein transferase activity; GO:0005515//protein binding	K10295 F-box protein 9 | (RefSeq) FBXO9, FBX9, NY-REN-57, VCIA1, dJ341E18.2; F-box protein 9	http://www.genome.jp/dbget-bin/www_bget?hsa:26268	-0.794183	6.25065e-35	4.13379e-34	FALSE	0.463252	1.1201e-15	4.14205e-15	FALSE	-1.26152	3.76581e-141	9.99941e-140	DOWN
DYNC1I2	3178	15.9035	2863	16.2286	3162	16.4736	3206	17.0559	3415	16.8205	3689	17.8291	2825	15.088	2772	14.8316	3098	15.2712	chr2	172543919	172606668	DYNC1I2	1781	cytoplasmic dynein 1 intermediate chain 2 isoform x3	GO:0000086//G2/M transition of mitotic cell cycle; GO:0006888//ER to Golgi vesicle-mediated transport; GO:0007018//microtubule-based movement; GO:0016032//viral process; GO:0019886//antigen processing and presentation of exogenous peptide antigen via MHC class II; GO:0055114//oxidation-reduction process	GO:0005813//centrosome; GO:0005829//cytosol; GO:0005868//cytoplasmic dynein complex; GO:0005874//microtubule; GO:0016021//integral component of membrane; GO:0031982//vesicle	GO:0003777//microtubule motor activity; GO:0032403//protein complex binding	K10415 dynein intermediate chain, cytosolic | (RefSeq) DYNC1I2, DIC74, DNCI2, IC2, NEDMIBA; dynein c	http://www.genome.jp/dbget-bin/www_bget?hsa:1781	-0.0332904	0.433707	0.505348	FALSE	-0.039608	0.3124	0.385621	FALSE	0.00230906	0.960716	0.985477	FALSE
REG1A	0	0	0	0	0	0	0	0	0	0	0	0	0	0	0	0	0	0	chr2	79347584	79350545	REG1A	5967	lithostathine-1-alpha	GO:0008284//positive regulation of cell proliferation	GO:0070062//extracellular exosome	GO:0008083//growth factor activity; GO:0030246//carbohydrate binding	no KO assigned | (RefSeq) REG1A, ICRF, P19, PSP, PSPS, PSPS1, PTP, REG; regenerating family member 1	http://www.genome.jp/dbget-bin/www_bget?hsa:5967	-	-	-	-	-	-	-	-	-	-	-	-
ZCCHC10	389	3.91033	366	4.1674	434	4.54195	789	8.43166	1047	10.359	1049	10.184	597	6.4049	597	6.41644	562	5.56485	chr5	132332677	132362296	ZCCHC10	54819	zinc finger cchc domain-containing protein 10	-	-	GO:0003676//nucleic acid binding; GO:0005515//protein binding; GO:0008270//zinc ion binding	no KO assigned | (RefSeq) ZCCHC10; zinc finger CCHC-type containing 10	http://www.genome.jp/dbget-bin/www_bget?hsa:54819	1.07748	8.08727e-28	4.43189e-27	UP	0.607325	3.15193e-10	9.24844e-10	FALSE	0.465936	1.15271e-06	2.69525e-06	FALSE
LHCGR	0	0	0	0	0	0	0	0	0	0	0	0	0	0	0	0	0	0	chr2	48913913	48982880	LHCGR	3973	lutropin-choriogonadotropic hormone receptor	GO:0001541//ovarian follicle development; GO:0007189//adenylate cyclase-activating G-protein coupled receptor signaling pathway; GO:0007190//activation of adenylate cyclase activity; GO:0007200//phospholipase C-activating G-protein coupled receptor signaling pathway; GO:0007283//spermatogenesis; GO:0009755//hormone-mediated signaling pathway; GO:0030539//male genitalia development; GO:0032962//po…	GO:0005768//endosome; GO:0005887//integral component of plasma membrane	GO:0004964//luteinizing hormone receptor activity; GO:0008528//G-protein coupled peptide receptor activity; GO:0035472//choriogonadotropin hormone receptor activity; GO:0038106//choriogonadotropin hormone binding	K04248 lutropin-choriogonadotropic hormone receptor | (RefSeq) LHCGR, HHG, LCGR, LGR2, LH/CG-R, LH/C	http://www.genome.jp/dbget-bin/www_bget?hsa:3973	-	-	-	-	-	-	-	-	-	-	-	-
ADSSL1	129	1.53644	173	2.33395	129	1.59957	56	0.709063	49	0.574419	53	0.60965	26	0.3305	19	0.241955	23	0.26984	chr14	105190534	105213662	ADSSL1	122622	adenylosuccinate synthetase isozyme 1	GO:0002376//immune system process; GO:0006531//aspartate metabolic process; GO:0006541//glutamine metabolic process; GO:0014850//response to muscle activity; GO:0035690//cellular response to drug; GO:0042594//response to starvation; GO:0044208//'de novo' AMP biosynthetic process; GO:0046040//IMP metabolic process; GO:0071257//cellular response to electrical stimulus	GO:0005829//cytosol; GO:0016021//integral component of membrane	GO:0000287//magnesium ion binding; GO:0003924//GTPase activity; GO:0004019//adenylosuccinate synthase activity; GO:0005525//GTP binding; GO:0042301//phosphate ion binding; GO:0042803//protein homodimerization activity; GO:0051015//actin filament binding	K01939 adenylosuccinate synthase [EC:6.3.4.4] | (RefSeq) ADSS1, ADSSL1, MPD5; adenylosuccinate synth	http://www.genome.jp/dbget-bin/www_bget?hsa:122622	-1.65041	1.97684e-14	6.84308e-14	DOWN	-2.62622	4.9192e-25	2.49286e-24	DOWN	0.971235	0.000162669	0.000317636	FALSE
OR1Q1	0	0	2	0.0523651	0	0	0	0	0	0	0	0	0	0	0	0	0	0	chr9	125377017	125377961	OR1Q1	158131	olfactory receptor 1q1	GO:0007186//G-protein coupled receptor signaling pathway; GO:0050911//detection of chemical stimulus involved in sensory perception of smell	GO:0005886//plasma membrane; GO:0016021//integral component of membrane	GO:0004930//G-protein coupled receptor activity; GO:0004984//olfactory receptor activity	K04257 olfactory receptor | (RefSeq) OR1Q1, HSTPCR106, OR1Q2, OR1Q3, OR9-25, OR9-A, OST226, OST226OR	http://www.genome.jp/dbget-bin/www_bget?hsa:158131	-2.75784	0.511207	0.569478	FALSE	-2.65346	0.510174	0.576575	FALSE	-	-	-	-
FLT3	10	0.0568547	12	0.0772801	8	0.0473527	35	0.211547	23	0.128707	15	0.0823641	39	0.236649	20	0.121577	34	0.190414	chr13	28577411	28674729	FLT3	2322	receptor-type tyrosine-protein kinase flt3 isoform x1	GO:0001776//leukocyte homeostasis; GO:0002318//myeloid progenitor cell differentiation; GO:0002328//pro-B cell differentiation; GO:0008284//positive regulation of cell proliferation; GO:0010243//response to organonitrogen compound; GO:0014068//positive regulation of phosphatidylinositol 3-kinase signaling; GO:0019221//cytokine-mediated signaling pathway; GO:0030183//B cell differentiation; GO:003…	GO:0005634//nucleus; GO:0005788//endoplasmic reticulum lumen; GO:0005829//cytosol; GO:0005887//integral component of plasma membrane; GO:0043234//protein complex	GO:0004896//cytokine receptor activity; GO:0005021//vascular endothelial growth factor-activated receptor activity; GO:0005524//ATP binding; GO:0032403//protein complex binding; GO:0035259//glucocorticoid receptor binding; GO:0042803//protein homodimerization activity	K05092 fms-related tyrosine kinase 3 [EC:2.7.10.1] | (RefSeq) FLT3, CD135, FLK-2, FLK2, STK1; fms re	http://www.genome.jp/dbget-bin/www_bget?hsa:2322	1.08642	0.0171366	0.0265696	UP	1.65773	2.31678e-05	4.97731e-05	UP	-0.574616	0.147304	0.191105	FALSE
MKRN2OS	22	0.44332	35	0.798882	17	0.356641	7	0.149956	6	0.119002	10	0.194614	12	0.258077	13	0.280087	17	0.33744	chr3	12581280	12586963	MKRN2OS	100129480	---	-	-	-	no KO assigned | (RefSeq) MKRN2OS, C3orf83, MKRN2-AS1; MKRN2 opposite strand	http://www.genome.jp/dbget-bin/www_bget?hsa:100129480	-1.88002	2.36746e-05	4.96903e-05	DOWN	-0.785967	0.0438706	0.06536	FALSE	-1.09733	0.0150642	0.0234649	DOWN
UQCRHL	100	4.06014	90	4.13908	106	4.48059	176	7.59672	152	6.07425	187	7.33269	166	7.19323	175	7.59688	145	5.79913	chr1	16133657	16134194	UQCRHL	440567	cytochrome b-c1 complex subunit mitochondrial isoform x1	GO:0006122//mitochondrial electron transport, ubiquinol to cytochrome c; GO:0009060//aerobic respiration; GO:1902600//hydrogen ion transmembrane transport	GO:0005746//mitochondrial respiratory chain	GO:0005515//protein binding; GO:0008121//ubiquinol-cytochrome-c reductase activity	K00416 ubiquinol-cytochrome c reductase subunit 6 | (RefSeq) UQCRHL; ubiquinol-cytochrome c reductas	http://www.genome.jp/dbget-bin/www_bget?hsa:440567	0.603622	6.72545e-05	0.000136338	FALSE	0.761677	2.3023e-06	5.33621e-06	FALSE	-0.162047	0.290645	0.352861	FALSE
ZBED4	2334	7.40385	2011	7.22585	2338	7.72128	3027	10.208	3090	9.64769	3392	10.3918	2178	7.37376	2104	7.13605	2199	6.87124	chr22	50247497	50283726	ZBED4	9889	zinc finger bed domain-containing protein 4	GO:0006357//regulation of transcription from RNA polymerase II promoter	GO:0005634//nucleus; GO:0005737//cytoplasm	GO:0000977//RNA polymerase II regulatory region sequence-specific DNA binding; GO:0003700//transcription factor activity, sequence-specific DNA binding; GO:0046872//metal ion binding; GO:0046983//protein dimerization activity	no KO assigned | (RefSeq) ZBED4; zinc finger BED-type containing 4	http://www.genome.jp/dbget-bin/www_bget?hsa:9889	0.313435	1.18536e-10	3.46754e-10	FALSE	0.000589889	0.988834	1	FALSE	0.308763	3.39425e-10	9.79652e-10	FALSE
CTSG	1403	33.1673	1260	33.7398	1391	34.2348	14228	357.576	15427	358.956	15304	349.411	2150	54.2456	1834	46.3561	2269	52.8372	chr14	25042724	25045466	CTSG	1511	cathepsin g	GO:0002003//angiotensin maturation; GO:0006468//protein phosphorylation; GO:0022617//extracellular matrix disassembly; GO:0032496//response to lipopolysaccharide; GO:0044130//negative regulation of growth of symbiont in host; GO:0050778//positive regulation of immune response; GO:0050832//defense response to fungus; GO:0070946//neutrophil mediated killing of gram-positive bacterium	GO:0005615//extracellular space; GO:0005634//nucleus; GO:0005886//plasma membrane; GO:0009986//cell surface; GO:0030141//secretory granule; GO:0031012//extracellular matrix; GO:0070062//extracellular exosome	GO:0004252//serine-type endopeptidase activity; GO:0005515//protein binding; GO:0008201//heparin binding	K01319 cathepsin G [EC:3.4.21.20] | (RefSeq) CTSG, CATG, CG; cathepsin G	http://www.genome.jp/dbget-bin/www_bget?hsa:1511	3.27504	0	0	UP	0.666678	3.45162e-27	1.86081e-26	FALSE	2.60411	0	0	UP
C11orf1	199	4.57084	191	4.96932	271	6.48038	180	4.39529	134	3.0294	211	4.68065	165	4.04484	159	3.90478	229	5.18122	chr11	111749948	111754798	C11orf1	64776	upf0686 protein c11orf1 homolog isoform x2	-	GO:0005654//nucleoplasm	-	no KO assigned | (RefSeq) C11orf1; chromosome 11 open reading frame 1	http://www.genome.jp/dbget-bin/www_bget?hsa:64776	-0.527448	0.00473454	0.00791836	FALSE	-0.220088	0.193721	0.25187	FALSE	-0.311421	0.0907059	0.123693	FALSE
DPYSL5	0	0	0	0	0	0	0	0	3	0.0125119	0	0	2	0.00904481	8	0.0362444	0	0	chr2	27070969	27173219	DPYSL5	56896	dihydropyrimidinase-related protein 5	GO:0007165//signal transduction; GO:0007411//axon guidance	GO:0005829//cytosol; GO:0030425//dendrite; GO:0043025//neuronal cell body	GO:0008017//microtubule binding; GO:0016810//hydrolase activity, acting on carbon-nitrogen (but not peptide) bonds	K07529 dihydropyrimidinase-like 5 | (RefSeq) DPYSL5, CRAM, CRMP-5, CRMP5, CV2, Ulip6; dihydropyrimid	http://www.genome.jp/dbget-bin/www_bget?hsa:56896	3.08347	0.26681	0.327573	FALSE	4.82382	0.00427842	0.0073892	UP	-1.86254	0.100287	0.135604	FALSE
DPYSL2	14220	68.8269	12265	67.2429	13606	68.561	10692	55.0161	11944	56.9005	12248	57.2537	10410	53.7754	11504	59.5337	12052	57.4607	chr8	26371709	26515693	DPYSL2	1808	dihydropyrimidinase-related protein 2 isoform x2	GO:0001975//response to amphetamine; GO:0006139//nucleobase-containing compound metabolic process; GO:0006897//endocytosis; GO:0007010//cytoskeleton organization; GO:0007165//signal transduction; GO:0007411//axon guidance; GO:0014049//positive regulation of glutamate secretion; GO:0021510//spinal cord development; GO:0021772//olfactory bulb development; GO:0030516//regulation of axon extension; G…	GO:0005739//mitochondrion; GO:0005829//cytosol; GO:0005874//microtubule; GO:0016020//membrane; GO:0030425//dendrite; GO:0030426//growth cone; GO:0043025//neuronal cell body; GO:0043195//terminal bouton; GO:0043209//myelin sheath; GO:0043234//protein complex; GO:0070062//extracellular exosome	GO:0004157//dihydropyrimidinase activity; GO:0008017//microtubule binding; GO:0019901//protein kinase binding	K07528 dihydropyrimidinase-like 2 | (RefSeq) DPYSL2, CRMP-2, CRMP2, DHPRP2, DRP-2, DRP2, N2A3, ULIP-	http://www.genome.jp/dbget-bin/www_bget?hsa:1808	-0.397187	4.65007e-31	2.78856e-30	FALSE	-0.195712	4.70454e-07	1.1458e-06	FALSE	-0.205547	1.23532e-06	2.88287e-06	FALSE
DPYSL3	1050	4.35627	1207	5.67222	1189	5.13565	477	2.10386	478	1.95192	544	2.17974	1717	7.60273	1787	7.92694	1881	7.68719	chr5	146770371	146889619	DPYSL3	1809	dihydropyrimidinase-related protein 3 isoform x2	GO:0000226//microtubule cytoskeleton organization; GO:0007411//axon guidance; GO:0010976//positive regulation of neuron projection development; GO:0010977//negative regulation of neuron projection development; GO:0030336//negative regulation of cell migration; GO:0048678//response to axon injury; GO:0051017//actin filament bundle assembly; GO:0051260//protein homooligomerization; GO:0051491//posi…	GO:0005615//extracellular space; GO:0005829//cytosol; GO:0030027//lamellipodium; GO:0030426//growth cone; GO:0031941//filamentous actin; GO:0044297//cell body; GO:0070382//exocytic vesicle	GO:0016810//hydrolase activity, acting on carbon-nitrogen (but not peptide) bonds; GO:0017124//SH3 domain binding; GO:0031005//filamin binding; GO:0035374//chondroitin sulfate binding	no KO assigned | (RefSeq) DPYSL3, CRMP-4, CRMP4, DRP-3, DRP3, LCRMP, ULIP, ULIP-1; dihydropyrimidina	http://www.genome.jp/dbget-bin/www_bget?hsa:1809	-1.404	6.67847e-47	5.77016e-46	DOWN	0.680367	8.47807e-18	3.40947e-17	FALSE	-2.08828	7.32458e-226	3.69359e-224	DOWN
PTPRCAP	16	0.385333	9	0.245516	7	0.17551	48	1.22894	31	0.734829	19	0.441927	10	0.257034	19	0.489244	16	0.379568	chr11	67202981	67205153	PTPRCAP	5790	protein tyrosine phosphatase receptor type c-associated protein	GO:0006952//defense response	GO:0005886//plasma membrane; GO:0016021//integral component of membrane	-	no KO assigned | (RefSeq) PTPRCAP, CD45-AP, LPAP; protein tyrosine phosphatase receptor type C assoc	http://www.genome.jp/dbget-bin/www_bget?hsa:5790	1.43229	0.00171621	0.00303061	UP	0.534883	0.215751	0.277778	FALSE	0.891761	0.0373353	0.0548855	FALSE
C10orf55	54	0.469381	51	0.502136	32	0.289581	68	0.628366	63	0.538989	51	0.428136	43	0.398909	49	0.45539	49	0.419547	chr10	75669727	75682535	C10orf55	-	low quality protein: uncharacterized protein c10orf55 homolog	GO:0006508//proteolysis; GO:0006935//chemotaxis; GO:0007275//multicellular organismal development; GO:0010469//regulation of receptor activity; GO:0014910//regulation of smooth muscle cell migration; GO:0030335//positive regulation of cell migration; GO:0033628//regulation of cell adhesion mediated by integrin; GO:0042127//regulation of cell proliferation; GO:0042730//fibrinolysis; GO:0044702//si…	GO:0005615//extracellular space; GO:0005886//plasma membrane; GO:0005925//focal adhesion; GO:0009986//cell surface; GO:0070062//extracellular exosome	GO:0004252//serine-type endopeptidase activity; GO:0005515//protein binding	-	-	0.21528	0.4106	0.4811	FALSE	0.0820735	0.771794	0.823415	FALSE	0.128539	0.595006	0.651768	FALSE
GPR17	10	0.0890847	8	0.080726	8	0.0741962	16	0.151529	8	0.0701457	8	0.0688293	4	0.038031	11	0.104774	16	0.140403	chr2	128403439	128410213	GPR17	2840	uracil nucleotide cysteinyl leukotriene receptor isoform x1	GO:0007186//G-protein coupled receptor signaling pathway; GO:0070098//chemokine-mediated signaling pathway	GO:0005887//integral component of plasma membrane	GO:0004950//chemokine receptor activity	K08404 G protein-coupled receptor 17 | (RefSeq) GPR17; G protein-coupled receptor 17	http://www.genome.jp/dbget-bin/www_bget?hsa:2840	0.111342	0.916244	0.943518	FALSE	0.28621	0.683158	0.743878	FALSE	-0.172898	0.864783	0.89879	FALSE
KRTAP10-12	0	0	0	0	0	0	0	0	0	0	0	0	0	0	0	0	0	0	chr21	46117087	46117959	KRTAP10-12	386685	keratin associated protein	-	GO:0045095//keratin filament	GO:0042802//identical protein binding	no KO assigned | (RefSeq) KRTAP10-12, KAP10.12, KRTAP18-12, KRTAP18.12; keratin associated protein 1	http://www.genome.jp/dbget-bin/www_bget?hsa:386685	-	-	-	-	-	-	-	-	-	-	-	-
KRTAP10-11	0	0	0	0	0	0	0	0	0	0	0	0	0	0	0	0	0	0	chr21	46066331	46067567	KRTAP10-11	386678	Keratin-associated protein 10-11	-	-	-	no KO assigned | (RefSeq) KRTAP10-11, KAP10.11, KAP10.9, KAP18-9, KAP18.11, KRTAP10-9, KRTAP10.9, KR	http://www.genome.jp/dbget-bin/www_bget?hsa:386678	-	-	-	-	-	-	-	-	-	-	-	-
KRTAP10-10	0	0	0	0	0	0	0	0	0	0	1	0.0191784	0	0	0	0	0	0	chr21	46057273	46058372	KRTAP10-10	353333	Keratin-associated protein 10-10	-	-	-	no KO assigned | (RefSeq) KRTAP10-10, KAP10.10, KAP18.10, KRTAP18-10, KRTAP18.10; keratin associated	http://www.genome.jp/dbget-bin/www_bget?hsa:353333	-	-	-	-	-	-	-	-	-	-	-	-
IGFBP2	173	3.14912	110	2.26806	154	2.91844	164	3.17365	158	2.83079	187	3.28749	104	2.02046	109	2.12141	93	1.66755	chr2	217497551	217529159	IGFBP2	3485	insulin-like growth factor-binding protein 2	GO:0001558//regulation of cell growth; GO:0007565//female pregnancy; GO:0007568//aging; GO:0007584//response to nutrient; GO:0009612//response to mechanical stimulus; GO:0010226//response to lithium ion; GO:0032355//response to estradiol; GO:0032526//response to retinoic acid; GO:0032868//response to insulin; GO:0032870//cellular response to hormone stimulus; GO:0042104//positive regulation of ac…	GO:0005615//extracellular space; GO:0016324//apical plasma membrane; GO:0031410//cytoplasmic vesicle; GO:0070062//extracellular exosome	GO:0005102//receptor binding; GO:0031994//insulin-like growth factor I binding; GO:0031995//insulin-like growth factor II binding	K23575 insulin-like growth factor-binding protein 2 | (RefSeq) IGFBP2, IBP2, IGF-BP53; insulin like	http://www.genome.jp/dbget-bin/www_bget?hsa:3485	0.0301156	0.85558	0.889494	FALSE	-0.460214	0.00807714	0.0134838	FALSE	0.487732	0.00150154	0.00264563	FALSE
IGFBP3	1892	15.762	1380	13.0224	1729	14.996	769	6.81067	923	7.56834	983	7.90906	37411	332.632	32004	285.07	41502	340.576	chr7	45951844	45960871	IGFBP3	3486	insulin-like growth factor-binding protein 3	GO:0001558//regulation of cell growth; GO:0001649//osteoblast differentiation; GO:0001933//negative regulation of protein phosphorylation; GO:0009968//negative regulation of signal transduction; GO:0010906//regulation of glucose metabolic process; GO:0014912//negative regulation of smooth muscle cell migration; GO:0043065//positive regulation of apoptotic process; GO:0043085//positive regulation …	GO:0005634//nucleus; GO:0042567//insulin-like growth factor ternary complex; GO:0070062//extracellular exosome	GO:0001968//fibronectin binding; GO:0008160//protein tyrosine phosphatase activator activity; GO:0031994//insulin-like growth factor I binding; GO:0031995//insulin-like growth factor II binding; GO:0046872//metal ion binding	K10138 insulin-like growth factor-binding protein 3 | (RefSeq) IGFBP3, BP-53, IBP3; insulin like gro	http://www.genome.jp/dbget-bin/www_bget?hsa:3486	-1.09622	4.57619e-44	3.70408e-43	DOWN	4.51661	0	0	UP	-5.61667	0	0	DOWN
LRFN1	519	3.61967	429	3.38906	410	2.97697	378	2.80263	371	2.54674	414	2.78858	239	1.77899	223	1.66289	150	1.0305	chr19	39797457	39805976	LRFN1	57622	leucine-rich repeat and fibronectin type iii domain-containing protein 1	GO:0007268//synaptic transmission; GO:0007409//axonogenesis	GO:0009986//cell surface; GO:0014069//postsynaptic density; GO:0016021//integral component of membrane; GO:0030054//cell junction; GO:0045211//postsynaptic membrane	-	K16354 leucine-rich repeat and fibronectin type-III domain-containing protein 1 | (RefSeq) LRFN1, SA	http://www.genome.jp/dbget-bin/www_bget?hsa:57622	-0.418375	3.17957e-05	6.61608e-05	FALSE	-1.09566	1.51407e-10	4.50943e-10	DOWN	0.673852	5.66753e-05	0.000115415	FALSE
IGFBP1	0	0	4	0.0599819	0	0	0	0	0	0	0	0	0	0	0	0	0	0	chr7	45927959	45933267	IGFBP1	3484	insulin-like growth factor-binding protein 1	GO:0008286//insulin receptor signaling pathway; GO:0030307//positive regulation of cell growth; GO:0036499//PERK-mediated unfolded protein response; GO:0042246//tissue regeneration; GO:0043567//regulation of insulin-like growth factor receptor signaling pathway; GO:0044267//cellular protein metabolic process; GO:0090090//negative regulation of canonical Wnt signaling pathway	GO:0005615//extracellular space	GO:0005102//receptor binding; GO:0031994//insulin-like growth factor I binding; GO:0031995//insulin-like growth factor II binding	K23578 insulin-like growth factor-binding protein 1 | (RefSeq) IGFBP1, AFBP, IBP1, IGF-BP25, PP12, h	http://www.genome.jp/dbget-bin/www_bget?hsa:3484	-3.65406	0.141991	0.18553	FALSE	-3.5407	0.14041	0.188266	FALSE	-	-	-	-
IGFBP6	83	1.87683	76	1.94662	73	1.71853	217	5.21649	256	5.69763	253	5.52519	212	5.11631	246	5.94754	259	5.76899	chr12	53491436	53496128	IGFBP6	3489	insulin-like growth factor-binding protein 6	GO:0001558//regulation of cell growth; GO:0008285//negative regulation of cell proliferation; GO:0043567//regulation of insulin-like growth factor receptor signaling pathway; GO:0044267//cellular protein metabolic process; GO:0090090//negative regulation of canonical Wnt signaling pathway	GO:0005615//extracellular space; GO:0005794//Golgi apparatus; GO:0070062//extracellular exosome	GO:0005102//receptor binding; GO:0031994//insulin-like growth factor I binding; GO:0031995//insulin-like growth factor II binding	K23579 insulin-like growth factor-binding protein 6 | (RefSeq) IGFBP6, IBP6; insulin like growth fac	http://www.genome.jp/dbget-bin/www_bget?hsa:3489	1.44677	2.0599e-25	1.0493e-24	UP	1.66815	6.28222e-30	3.62781e-29	UP	-0.22563	0.0514974	0.0734843	FALSE
MRGPRF	2	0.0191779	5	0.0543076	0	0	10	0.101939	6	0.0566277	5	0.0463042	11	0.112574	6	0.0615144	4	0.0377819	chr11	68771862	68780850	MRGPRF	116535	mas-related g-protein coupled receptor member f isoform x2	GO:0007186//G-protein coupled receptor signaling pathway	GO:0005887//integral component of plasma membrane; GO:0031965//nuclear membrane; GO:0070062//extracellular exosome	GO:0004930//G-protein coupled receptor activity	K08394 Mas-related G protein-coupled receptor member F | (RefSeq) MRGPRF, GPR140, GPR168, MRGF, RTA;	http://www.genome.jp/dbget-bin/www_bget?hsa:116535	1.34239	0.100283	0.136034	FALSE	1.5728	0.0459406	0.0682058	FALSE	-0.238105	0.71937	0.766745	FALSE
IGFBP4	497	4.85521	543	6.00858	594	6.04125	1021	10.6035	991	9.5287	965	9.10457	334	3.48235	263	2.74703	327	3.14668	chr17	38599676	38613982	IGFBP4	3487	insulin-like growth factor-binding protein 4	GO:0001501//skeletal system development; GO:0001558//regulation of cell growth; GO:0006259//DNA metabolic process; GO:0006954//inflammatory response; GO:0010906//regulation of glucose metabolic process; GO:0043410//positive regulation of MAPK cascade; GO:0043568//positive regulation of insulin-like growth factor receptor signaling pathway; GO:0044342//type B pancreatic cell proliferation; GO:0090…	GO:0005615//extracellular space	GO:0005102//receptor binding; GO:0031994//insulin-like growth factor I binding; GO:0031995//insulin-like growth factor II binding	K23576 insulin-like growth factor-binding protein 4 | (RefSeq) IGFBP4, BP-4, HT29-IGFBP, IBP4, IGFBP	http://www.genome.jp/dbget-bin/www_bget?hsa:3487	0.667927	3.07601e-12	9.71743e-12	FALSE	-0.784523	8.05512e-11	2.43616e-10	FALSE	1.44771	3.2157e-49	2.91143e-48	UP
IGFBP5	25	0.0875284	47	0.186392	37	0.134865	6	0.0223322	6	0.0206761	6	0.020288	484	1.80854	636	2.38079	580	2.00028	chr2	217536828	217560272	IGFBP5	3488	insulin-like growth factor-binding protein 5	GO:0001558//regulation of cell growth; GO:0007565//female pregnancy; GO:0010906//regulation of glucose metabolic process; GO:0014912//negative regulation of smooth muscle cell migration; GO:0017148//negative regulation of translation; GO:0031069//hair follicle morphogenesis; GO:0042593//glucose homeostasis; GO:0043568//positive regulation of insulin-like growth factor receptor signaling pathway; …	GO:0005622//intracellular; GO:0042567//insulin-like growth factor ternary complex	GO:0001968//fibronectin binding; GO:0031994//insulin-like growth factor I binding; GO:0031995//insulin-like growth factor II binding	K23577 insulin-like growth factor-binding protein 5 | (RefSeq) IGFBP5, IBP5; insulin like growth fac	http://www.genome.jp/dbget-bin/www_bget?hsa:3488	-2.78201	6.82454e-11	2.0251e-10	DOWN	3.99517	9.19175e-101	1.68047e-99	UP	-6.77392	9.04094e-199	3.80301e-197	DOWN
SKP2	639	5.0775	513	4.61728	519	4.29343	535	4.51934	589	4.60651	668	5.12632	726	6.15687	667	5.6667	692	5.41637	chr5	36152145	36184143	SKP2	6502	s-phase kinase-associated protein 2 isoform x2	GO:0000082//G1/S transition of mitotic cell cycle; GO:0000086//G2/M transition of mitotic cell cycle; GO:0016310//phosphorylation; GO:0031145//anaphase-promoting complex-dependent proteasomal ubiquitin-dependent protein catabolic process; GO:0033148//positive regulation of intracellular estrogen receptor signaling pathway; GO:0042981//regulation of apoptotic process; GO:0048661//positive regulati…	GO:0005654//nucleoplasm; GO:0005730//nucleolus; GO:0005829//cytosol; GO:0016021//integral component of membrane; GO:0019005//SCF ubiquitin ligase complex	GO:0016301//kinase activity; GO:0042802//identical protein binding; GO:0061630//ubiquitin protein ligase activity	K03875 F-box and leucine-rich repeat protein 1 (S-phase kinase-associated protein 2) | (RefSeq) SKP2	http://www.genome.jp/dbget-bin/www_bget?hsa:6502	-0.0954843	0.302657	0.367318	FALSE	0.365667	2.25784e-05	4.85569e-05	FALSE	-0.465063	4.62248e-08	1.18269e-07	FALSE
CYP2R1	660	8.90473	503	7.68715	676	9.49537	369	5.29268	407	5.4048	351	4.57366	352	5.06867	342	4.93354	339	4.50536	chr11	14899555	14913751	CYP2R1	120227	vitamin d 25-hydroxylase	GO:0010164//response to cesium ion; GO:0010212//response to ionizing radiation; GO:0036378//calcitriol biosynthetic process from calciol; GO:0055114//oxidation-reduction process	GO:0005789//endoplasmic reticulum membrane; GO:0016021//integral component of membrane; GO:0031090//organelle membrane	GO:0005506//iron ion binding; GO:0008395//steroid hydroxylase activity; GO:0016705//oxidoreductase activity, acting on paired donors, with incorporation or reduction of molecular oxygen; GO:0020037//heme binding; GO:0030343//vitamin D3 25-hydroxylase activity	K07419 vitamin D 25-hydroxylase [EC:1.14.14.24] | (RefSeq) CYP2R1; cytochrome P450 family 2 subfamil	http://www.genome.jp/dbget-bin/www_bget?hsa:120227	-0.896706	5.34692e-18	2.14651e-17	FALSE	-0.782995	7.5942e-15	2.71242e-14	FALSE	-0.117707	0.269879	0.33007	FALSE
CKLF	101	2.95342	121	4.00783	118	3.59231	107	3.32628	128	3.68401	138	3.89729	47	1.46681	36	1.12554	40	1.15217	chr16	66586466	66600190	CKLF	51192	chemokine-like factor isoform x1	GO:0000122//negative regulation of transcription from RNA polymerase II promoter; GO:0001525//angiogenesis; GO:0008283//cell proliferation; GO:0030593//neutrophil chemotaxis; GO:0032534//regulation of microvillus assembly; GO:0032940//secretion by cell; GO:0035914//skeletal muscle cell differentiation; GO:0045600//positive regulation of fat cell differentiation; GO:0045944//positive regulation of…	GO:0005615//extracellular space; GO:0005654//nucleoplasm; GO:0005794//Golgi apparatus; GO:0005886//plasma membrane; GO:0016021//integral component of membrane	GO:0000978//RNA polymerase II core promoter proximal region sequence-specific DNA binding; GO:0001077//transcriptional activator activity, RNA polymerase II core promoter proximal region sequence-specific binding; GO:0008009//chemokine activity; GO:0046872//metal ion binding	no KO assigned | (RefSeq) CKLF, C32, CKLF1, CKLF2, CKLF3, CKLF4, HSPC224, UCK-1; chemokine like fact	http://www.genome.jp/dbget-bin/www_bget?hsa:51192	-0.0696806	0.673979	0.725945	FALSE	-1.42622	1.0952e-11	3.44438e-11	DOWN	1.35176	1.10507e-12	3.61214e-12	UP
HNRNPA1L2	221	2.10346	243	2.6198	274	2.71506	171	1.73025	213	1.99539	267	2.45433	161	1.63546	139	1.41453	136	1.27507	chr13	53191605	53217919	HNRNPA1L2	144983	heterogeneous nuclear ribonucleoprotein a1-like	GO:0000398//mRNA splicing, via spliceosome; GO:0006405//RNA export from nucleus; GO:0008543//fibroblast growth factor receptor signaling pathway; GO:0016032//viral process; GO:0032211//negative regulation of telomere maintenance via telomerase; GO:0032212//positive regulation of telomere maintenance via telomerase; GO:0051028//mRNA transport; GO:0051170//nuclear import	GO:0005654//nucleoplasm; GO:0005737//cytoplasm; GO:0016020//membrane; GO:0019013//viral nucleocapsid; GO:0070062//extracellular exosome; GO:0071013//catalytic step 2 spliceosome	GO:0000166//nucleotide binding; GO:0003727//single-stranded RNA binding; GO:0005515//protein binding; GO:0044822//poly(A) RNA binding; GO:0098505//G-rich strand telomeric DNA binding	K12741 heterogeneous nuclear ribonucleoprotein A1/A3 | (RefSeq) HNRNPA1L2; heterogeneous nuclear rib	http://www.genome.jp/dbget-bin/www_bget?hsa:144983	-0.386781	0.0123807	0.0196127	FALSE	-0.717402	2.86854e-06	6.58988e-06	FALSE	0.32614	0.0474354	0.0681129	FALSE
DAW1	24	0.266928	9	0.113382	16	0.185264	6	0.0709424	6	0.0656813	18	0.193346	2	0.0237403	2	0.0237831	2	0.0219112	chr2	228736092	228789060	DAW1	164781	dynein assembly factor with wdr repeat domains 1	GO:0007368//determination of left/right symmetry; GO:0007507//heart development	GO:0005929//cilium	-	K19760 dynein assembly factor with WDR repeat domains 1 | (RefSeq) DAW1, ODA16, WDR69; dynein assemb	http://www.genome.jp/dbget-bin/www_bget?hsa:164781	-0.88951	0.0897731	0.123051	FALSE	-2.89748	1.7941e-06	4.18456e-06	DOWN	2.00545	0.00866472	0.0139334	UP
GJA1	8	0.0551431	6	0.0468461	8	0.057409	2	0.0146556	0	0	4	0.0266282	42	0.308976	40	0.294793	45	0.30554	chr6	121756723	121770890	GJA1	2697	low quality protein: gap junction alpha-1 protein	GO:0001701//in utero embryonic development; GO:0001764//neuron migration; GO:0001937//negative regulation of endothelial cell proliferation; GO:0001947//heart looping; GO:0002027//regulation of heart rate; GO:0002070//epithelial cell maturation; GO:0002088//lens development in camera-type eye; GO:0002544//chronic inflammatory response; GO:0003104//positive regulation of glomerular filtration; GO:…	GO:0000139//Golgi membrane; GO:0005741//mitochondrial outer membrane; GO:0005764//lysosome; GO:0005769//early endosome; GO:0005771//multivesicular body; GO:0005789//endoplasmic reticulum membrane; GO:0005829//cytosol; GO:0005882//intermediate filament; GO:0005887//integral component of plasma membrane; GO:0005916//fascia adherens; GO:0005922//connexon complex; GO:0005925//focal adhesion; GO:00163…	GO:0004871//signal transducer activity; GO:0005102//receptor binding; GO:0015075//ion transmembrane transporter activity; GO:0017124//SH3 domain binding; GO:0030165//PDZ domain binding; GO:0048487//beta-tubulin binding; GO:0071253//connexin binding; GO:0086075//gap junction channel activity involved in cardiac conduction electrical coupling; GO:0097110//scaffold protein binding	K07372 gap junction alpha-1 protein | (RefSeq) GJA1, AVSD3, CMDR, CX43, EKVP, EKVP3, GJAL, HLHS1, HS	http://www.genome.jp/dbget-bin/www_bget?hsa:2697	-1.99919	0.00388977	0.00659153	DOWN	2.55256	1.87023e-14	6.61176e-14	UP	-4.55653	3.65878e-26	1.94913e-25	DOWN
GJA3	111	0.465739	117	0.556065	125	0.546032	93	0.414834	82	0.338642	103	0.417385	244	1.09266	223	1.00041	225	0.929941	chr13	20712394	20735183	GJA3	2700	gap junction alpha-3 protein	GO:0007267//cell-cell signaling; GO:0007601//visual perception; GO:0009268//response to pH; GO:0042542//response to hydrogen peroxide; GO:0055085//transmembrane transport	GO:0005922//connexon complex; GO:0016021//integral component of membrane; GO:0045121//membrane raft	GO:0005243//gap junction channel activity; GO:0042802//identical protein binding	K07612 gap junction alpha-3 protein | (RefSeq) GJA3, CTRCT14, CX46, CZP3; gap junction protein alpha	http://www.genome.jp/dbget-bin/www_bget?hsa:2700	-0.542181	0.00121919	0.00218811	FALSE	1.01287	5.96067e-13	1.98335e-12	UP	-1.55899	1.0153e-26	5.50014e-26	DOWN
GJA4	3	0.0404012	3	0.045763	2	0.0280408	8	0.114534	6	0.0795302	8	0.10405	6	0.0862379	2	0.0287978	1	0.0132656	chr1	35258599	35261348	GJA4	2701	gap junction alpha-4 protein	GO:0001568//blood vessel development; GO:0003158//endothelium development; GO:0006816//calcium ion transport; GO:0007043//cell-cell junction assembly; GO:0007267//cell-cell signaling; GO:0048265//response to pain	GO:0005887//integral component of plasma membrane; GO:0005922//connexon complex	GO:0005515//protein binding	K07613 gap junction alpha-4 protein | (RefSeq) GJA4, CX37; gap junction protein alpha 4	http://www.genome.jp/dbget-bin/www_bget?hsa:2701	1.22818	0.0738169	0.103016	FALSE	0.209812	1	1	FALSE	1.01459	0.172233	0.220485	FALSE
GJA5	28	0.193673	14	0.109688	33	0.237637	22	0.161773	30	0.20424	15	0.100204	26	0.191937	28	0.207074	20	0.136268	chr1	147228332	147245466	GJA5	2702	gap junction alpha-5 protein	GO:0001501//skeletal system development; GO:0001525//angiogenesis; GO:0003105//negative regulation of glomerular filtration; GO:0003151//outflow tract morphogenesis; GO:0003158//endothelium development; GO:0003161//cardiac conduction system development; GO:0003174//mitral valve development; GO:0003193//pulmonary valve formation; GO:0003284//septum primum development; GO:0003294//atrial ventricula…	GO:0005887//integral component of plasma membrane; GO:0005922//connexon complex; GO:0014704//intercalated disc; GO:0042995//cell projection	GO:0055077//gap junction hemi-channel activity; GO:0071253//connexin binding; GO:0086077//gap junction channel activity involved in AV node cell-bundle of His cell electrical coupling	K07614 gap junction alpha-5 protein | (RefSeq) GJA5, ATFB11, CX40; gap junction protein alpha 5	http://www.genome.jp/dbget-bin/www_bget?hsa:2702	-0.344137	0.407873	0.478269	FALSE	0.0376783	0.954227	0.98477	FALSE	-0.386827	0.280092	0.341308	FALSE
GTPBP4	3228	28.0139	2881	28.3207	3033	27.4032	3278	30.2428	3546	30.2892	3563	29.8632	4111	38.0769	3979	36.9207	4467	38.1865	chr10	1034349	1063708	GTPBP4	23560	nucleolar gtp-binding protein 1 isoform x1	GO:0000079//regulation of cyclin-dependent protein serine/threonine kinase activity; GO:0001649//osteoblast differentiation; GO:0008156//negative regulation of DNA replication; GO:0008285//negative regulation of cell proliferation; GO:0022408//negative regulation of cell-cell adhesion; GO:0030336//negative regulation of cell migration; GO:0031397//negative regulation of protein ubiquitination; GO…	GO:0005730//nucleolus; GO:0005794//Golgi apparatus; GO:0031965//nuclear membrane; GO:0048471//perinuclear region of cytoplasm	GO:0003924//GTPase activity; GO:0005515//protein binding; GO:0005525//GTP binding; GO:0044822//poly(A) RNA binding	K06943 nucleolar GTP-binding protein | (RefSeq) GTPBP4, CRFG, NGB, NOG1; GTP binding protein 4	http://www.genome.jp/dbget-bin/www_bget?hsa:23560	-0.0122541	0.762705	0.806267	FALSE	0.500222	1.96948e-41	1.49618e-40	FALSE	-0.516439	9.24432e-39	6.81257e-38	FALSE
GJA8	0	0	0	0	0	0	2	0.0339748	0	0	2	0.0308649	0	0	0	0	0	0	chr1	147374946	147381396	GJA8	2703	gap junction alpha-8 protein	GO:0002088//lens development in camera-type eye; GO:0007267//cell-cell signaling; GO:0007601//visual perception; GO:0051260//protein homooligomerization; GO:0055085//transmembrane transport	GO:0005887//integral component of plasma membrane; GO:0005922//connexon complex	GO:0005243//gap junction channel activity	K07617 gap junction alpha-8 protein | (RefSeq) GJA8, CAE, CAE1, CTRCT1, CX50, CZP1, MP70; gap juncti	http://www.genome.jp/dbget-bin/www_bget?hsa:2703	3.46021	0.141991	0.18553	FALSE	-	-	-	-	3.44048	0.143164	0.186061	FALSE
GJA9	25	0.235181	20	0.213114	15	0.146907	37	0.370029	42	0.388883	20	0.181707	15	0.150601	16	0.16093	17	0.15753	chr1	39339739	39347298	GJA9	81025	gap junction alpha-9 protein	GO:0001508//action potential; GO:0006355//regulation of transcription, DNA-templated; GO:0007268//synaptic transmission; GO:0007601//visual perception; GO:0055085//transmembrane transport	GO:0005922//connexon complex; GO:0016021//integral component of membrane	GO:0003713//transcription coactivator activity; GO:0005243//gap junction channel activity	K07618 gap junction alpha-9 protein | (RefSeq) GJA9, CX58, CX59, GJA10; gap junction protein alpha 9	http://www.genome.jp/dbget-bin/www_bget?hsa:81025	0.530986	0.143255	0.187066	FALSE	-0.276296	0.480775	0.564001	FALSE	0.803531	0.0298364	0.0445357	FALSE
S1PR2	1432	8.72768	1304	9.0023	1214	7.70305	927	6.00631	1005	6.02878	957	5.63311	1338	8.70334	1291	8.41274	1468	8.81323	chr19	10332109	10341948	S1PR2	9294	sphingosine 1-phosphate receptor 2	GO:0000187//activation of MAPK activity; GO:0003376//sphingosine-1-phosphate signaling pathway; GO:0008284//positive regulation of cell proliferation; GO:0010800//positive regulation of peptidyl-threonine phosphorylation; GO:0031532//actin cytoskeleton reorganization; GO:0046847//filopodium assembly; GO:0090394//negative regulation of excitatory postsynaptic potential; GO:1903142//positive regula…	GO:0005886//plasma membrane; GO:0016021//integral component of membrane	GO:0001664//G-protein coupled receptor binding; GO:0005178//integrin binding; GO:0008289//lipid binding; GO:0038036//sphingosine-1-phosphate receptor activity	K04292 sphingosine 1-phosphate receptor 2 | (RefSeq) S1PR2, AGR16, DFNB68, EDG-5, EDG5, Gpcr13, H218	http://www.genome.jp/dbget-bin/www_bget?hsa:9294	-0.648127	9.02787e-20	3.86644e-19	FALSE	0.0937367	0.145822	0.194598	FALSE	-0.745873	4.88255e-33	3.14058e-32	FALSE
KDM3B	5146	16.4989	4593	16.6802	5337	17.8144	5387	18.3613	5944	18.7574	6230	19.291	4877	16.6883	5162	17.6953	5464	17.2564	chr5	137688285	137772716	KDM3B	51780	lysine-specific demethylase 3b isoform x1	GO:0006355//regulation of transcription, DNA-templated; GO:0016577//histone demethylation; GO:0032259//methylation; GO:0055114//oxidation-reduction process; GO:0072718//response to cisplatin	GO:0005654//nucleoplasm	GO:0008168//methyltransferase activity; GO:0016209//antioxidant activity; GO:0032452//histone demethylase activity; GO:0046872//metal ion binding; GO:0051213//dioxygenase activity	K15601 [histone H3]-dimethyl-L-lysine9 demethylase [EC:1.14.11.65] | (RefSeq) KDM3B, 5qNCA, C5orf7,	http://www.genome.jp/dbget-bin/www_bget?hsa:51780	0.0230235	0.585682	0.642666	FALSE	0.0833377	0.0413973	0.061947	FALSE	-0.0644067	0.113487	0.15193	FALSE
ZNF117	78	0.266052	54	0.208635	83	0.29474	51	0.184933	48	0.161147	43	0.141651	73	0.265748	68	0.247992	81	0.272152	chr7	64434830	64451414	ZNF117	7757	low quality protein: zinc finger protein 85-like	GO:0006355//regulation of transcription, DNA-templated	GO:0005634//nucleus	GO:0000978//RNA polymerase II core promoter proximal region sequence-specific DNA binding; GO:0003700//transcription factor activity, sequence-specific DNA binding; GO:0008270//zinc ion binding	K09228 KRAB domain-containing zinc finger protein | (RefSeq) ZNF208, PMIDP, ZNF95; zinc finger prote	http://www.genome.jp/dbget-bin/www_bget?hsa:7757	-0.785813	0.000318781	0.000606757	FALSE	0.0925059	0.653705	0.717015	FALSE	-0.883245	9.57207e-06	2.08415e-05	FALSE
ZNF114	56	0.487347	38	0.374588	50	0.453011	140	1.29524	136	1.16492	115	0.966558	16	0.148609	27	0.251229	29	0.2486	chr19	48773356	48790865	ZNF114	163071	zinc finger protein 114	GO:0006355//regulation of transcription, DNA-templated	GO:0005634//nucleus; GO:0070062//extracellular exosome	GO:0000978//RNA polymerase II core promoter proximal region sequence-specific DNA binding; GO:0005515//protein binding; GO:0046872//metal ion binding	K09228 KRAB domain-containing zinc finger protein | (RefSeq) ZNF114; zinc finger protein 114	http://www.genome.jp/dbget-bin/www_bget?hsa:163071	1.2502	1.3924e-10	4.05915e-10	UP	-0.95072	0.000583834	0.00111034	FALSE	2.19857	3.41722e-21	1.5544e-20	UP
KDM3A	4921	22.6014	3997	20.7939	4898	23.4201	3696	18.0462	3851	17.4086	4037	17.9069	3116	15.274	3045	14.9529	3427	15.5042	chr2	86668271	86719839	KDM3A	55818	lysine-specific demethylase 3a	GO:0001666//response to hypoxia; GO:0007290//spermatid nucleus elongation; GO:0008584//male gonad development; GO:0030521//androgen receptor signaling pathway; GO:0033169//histone H3-K9 demethylation; GO:0036123//histone H3-K9 dimethylation; GO:0045944//positive regulation of transcription from RNA polymerase II promoter; GO:0046293//formaldehyde biosynthetic process; GO:0051573//negative regulat…	GO:0005654//nucleoplasm; GO:0005737//cytoplasm; GO:0016020//membrane	GO:0000976//transcription regulatory region sequence-specific DNA binding; GO:0001047//core promoter binding; GO:0003700//transcription factor activity, sequence-specific DNA binding; GO:0005506//iron ion binding; GO:0008168//methyltransferase activity; GO:0032452//histone demethylase activity; GO:0050681//androgen receptor binding; GO:0051213//dioxygenase activity	K15601 [histone H3]-dimethyl-L-lysine9 demethylase [EC:1.14.11.65] | (RefSeq) KDM3A, JHDM2A, JHMD2A,	http://www.genome.jp/dbget-bin/www_bget?hsa:55818	-0.447499	3.42686e-22	1.58958e-21	FALSE	-0.481931	1.36008e-27	7.40674e-27	FALSE	0.03037	0.45813	0.530526	FALSE
ZNF112	0	0	0	0	0	0	0	0	2	0.011587	2	0.0113695	0	0	0	0	0	0	chr19	44830706	44860856	ZNF112	7771	zinc finger protein 112 isoform x2	GO:0006355//regulation of transcription, DNA-templated	GO:0005634//nucleus	GO:0003677//DNA binding; GO:0003700//transcription factor activity, sequence-specific DNA binding; GO:0046872//metal ion binding	K09228 KRAB domain-containing zinc finger protein | (RefSeq) ZNF112, ZFP112, ZNF228; zinc finger pro	http://www.genome.jp/dbget-bin/www_bget?hsa:7771	3.45228	0.141991	0.18553	FALSE	-	-	-	-	3.432	0.143164	0.186061	FALSE
SEZ6L	0	0	0	0	0	0	0	0	0	0	0	0	0	0	2	0.00720277	0	0	chr22	26565440	26779563	SEZ6L	23544	seizure 6-like protein isoform x1	GO:0008344//adult locomotory behavior; GO:0021680//cerebellar Purkinje cell layer development; GO:0060074//synapse maturation; GO:0090036//regulation of protein kinase C signaling	GO:0005789//endoplasmic reticulum membrane; GO:0016021//integral component of membrane; GO:0043025//neuronal cell body	-	no KO assigned | (RefSeq) SEZ6L; seizure related 6 homolog like	http://www.genome.jp/dbget-bin/www_bget?hsa:23544	-	-	-	-	2.6848	0.510174	0.576575	FALSE	-2.77441	0.511973	0.570784	FALSE
NIF3L1	795	11.9516	756	12.8736	776	12.1453	554	8.85401	482	7.13203	570	8.27586	489	7.84587	480	7.71534	562	8.32238	chr2	201754050	201768655	NIF3L1	60491	nif3-like protein 1 isoform x1	GO:0030182//neuron differentiation; GO:0045893//positive regulation of transcription, DNA-templated; GO:1903507//negative regulation of nucleic acid-templated transcription	GO:0005634//nucleus; GO:0005739//mitochondrion	GO:0008134//transcription factor binding; GO:0042802//identical protein binding	no KO assigned | (RefSeq) NIF3L1, ALS2CR1, CALS-7, MDS015; NGG1 interacting factor 3 like 1	http://www.genome.jp/dbget-bin/www_bget?hsa:60491	-0.730955	1.69044e-16	6.40616e-16	FALSE	-0.563588	1.43785e-13	4.91604e-13	FALSE	-0.17082	0.079187	0.109017	FALSE
TMC4	47	0.415311	36	0.360328	39	0.35878	34	0.319394	36	0.313102	55	0.469373	26	0.245201	29	0.273986	40	0.348168	chr19	54663833	54676944	TMC4	147798	transmembrane channel-like protein 4	GO:0006811//ion transport	GO:0016021//integral component of membrane; GO:0070062//extracellular exosome	-	K21988 transmembrane channel-like protein | (RefSeq) TMC4; transmembrane channel like 4	http://www.genome.jp/dbget-bin/www_bget?hsa:147798	-0.162107	0.538681	0.596587	FALSE	-0.317713	0.223359	0.286509	FALSE	0.151801	0.624612	0.680034	FALSE
TMC5	8	0.0383641	0	0	2	0.00998513	2	0.0101962	4	0.0188801	4	0.0185257	2	0.0102362	5	0.0256366	0	0	chr16	19421861	19510435	TMC5	79838	transmembrane channel-like protein 5 isoform x1	GO:0006811//ion transport	GO:0016021//integral component of membrane; GO:0070062//extracellular exosome	-	K21988 transmembrane channel-like protein | (RefSeq) TMC5; transmembrane channel like 5	http://www.genome.jp/dbget-bin/www_bget?hsa:79838	-0.172188	1	1	FALSE	-0.420739	0.679051	0.739938	FALSE	0.244252	1	1	FALSE
TMC6	9315	71.2191	8138	70.4777	8627	68.6691	6394	51.9707	6093	45.8514	6403	47.28	5492	44.8145	5591	45.7045	6571	49.4878	chr17	76108999	76128508	TMC6	11322	transmembrane channel-like protein 6 isoform x1	GO:0006811//ion transport	GO:0005789//endoplasmic reticulum membrane; GO:0005794//Golgi apparatus; GO:0016021//integral component of membrane; GO:0031965//nuclear membrane; GO:0070062//extracellular exosome	GO:0005515//protein binding	K21988 transmembrane channel-like protein | (RefSeq) TMC6, EV1, EVER1, EVIN1, LAK-4P; transmembrane	http://www.genome.jp/dbget-bin/www_bget?hsa:11322	-0.658992	4.16791e-47	3.61397e-46	FALSE	-0.521872	2.06977e-38	1.46406e-37	FALSE	-0.140894	0.0077112	0.0124959	FALSE
TMC7	41	0.219131	26	0.157403	33	0.183621	51	0.289775	61	0.320891	66	0.340677	23	0.131196	18	0.10286	23	0.121088	chr16	18995256	19075264	TMC7	79905	transmembrane channel-like protein 7	GO:0006811//ion transport	GO:0016021//integral component of membrane	-	K21988 transmembrane channel-like protein | (RefSeq) TMC7; transmembrane channel like 7	http://www.genome.jp/dbget-bin/www_bget?hsa:79905	0.635521	0.00589312	0.00975287	FALSE	-0.593818	0.0450965	0.0670723	FALSE	1.22655	8.82863e-07	2.07947e-06	UP
APIP	772	13.195	657	12.7197	702	12.4916	513	9.32143	593	9.97598	618	10.2014	1236	22.5468	1047	19.1335	1226	20.6413	chr11	34903842	34937958	APIP	51074	methylthioribulose-1-phosphate dehydratase	GO:0019284//L-methionine biosynthetic process from S-adenosylmethionine; GO:0019509//L-methionine biosynthetic process from methylthioadenosine; GO:0043066//negative regulation of apoptotic process; GO:0070372//regulation of ERK1 and ERK2 cascade	GO:0005737//cytoplasm	GO:0008270//zinc ion binding; GO:0042802//identical protein binding; GO:0046570//methylthioribulose 1-phosphate dehydratase activity	K08964 methylthioribulose-1-phosphate dehydratase [EC:4.2.1.109] | (RefSeq) APIP, APIP2, CGI-29, CGI	http://www.genome.jp/dbget-bin/www_bget?hsa:51074	-0.502562	3.4915e-11	1.05062e-10	FALSE	0.763241	1.79937e-25	9.24524e-25	FALSE	-1.26993	8.95472e-58	9.32454e-57	DOWN
TMC1	64	0.436735	69	0.533344	48	0.34101	25	0.181364	14	0.0940316	15	0.0988575	85	0.619058	61	0.445065	54	0.362982	chr9	75136717	75451267	TMC1	117531	transmembrane channel-like protein 1	GO:0050910//detection of mechanical stimulus involved in sensory perception of sound; GO:0060005//vestibular reflex; GO:0060117//auditory receptor cell development; GO:0070588//calcium ion transmembrane transport	GO:0009897//external side of plasma membrane; GO:0016021//integral component of membrane; GO:0032426//stereocilium bundle tip	GO:0005245//voltage-gated calcium channel activity	K21988 transmembrane channel-like protein | (RefSeq) TMC1, DFNA36, DFNB11, DFNB7; transmembrane chan	http://www.genome.jp/dbget-bin/www_bget?hsa:117531	-1.93275	2.26681e-10	6.54842e-10	DOWN	0.186912	0.47414	0.556964	FALSE	-2.12313	2.31177e-11	7.09906e-11	DOWN
TMC2	5	0.0344645	4	0.0312307	2	0.0143522	1	0.0073278	6	0.0407062	12	0.0798846	3	0.0220697	0	0	6	0.0407386	chr20	2517253	2622430	TMC2	117532	transmembrane channel-like protein 2	GO:0050910//detection of mechanical stimulus involved in sensory perception of sound; GO:0060005//vestibular reflex; GO:0070588//calcium ion transmembrane transport	GO:0016021//integral component of membrane; GO:0032426//stereocilium bundle tip	GO:0005245//voltage-gated calcium channel activity	K21988 transmembrane channel-like protein | (RefSeq) TMC2, C20orf145; transmembrane channel like 2	http://www.genome.jp/dbget-bin/www_bget?hsa:117532	0.56054	0.56686	0.62424	FALSE	-0.247557	0.852125	0.893027	FALSE	0.805021	0.371317	0.440098	FALSE
TMC3	19	0.125652	28	0.209746	28	0.19278	5	0.0351526	11	0.0716005	3	0.0191609	2	0.0141162	5	0.0353542	1	0.00651431	chr15	81624760	81666418	TMC3	342125	transmembrane channel-like protein 3	GO:0006811//ion transport	GO:0016021//integral component of membrane	-	K21988 transmembrane channel-like protein | (RefSeq) TMC3; transmembrane channel like 3	http://www.genome.jp/dbget-bin/www_bget?hsa:342125	-2.16174	9.8472e-07	2.27793e-06	DOWN	-3.13292	1.04891e-09	2.9984e-09	DOWN	0.967036	0.230841	0.287414	FALSE
PKLR	2	0.0143992	2	0.0163102	6	0.0449726	11	0.0841924	18	0.127552	10	0.0695326	6	0.0461035	2	0.0153955	0	0	chr1	155259084	155271225	PKLR	5313	pyruvate kinase pklr isoform x3	GO:0001666//response to hypoxia; GO:0006754//ATP biosynthetic process; GO:0007584//response to nutrient; GO:0009408//response to heat; GO:0009749//response to glucose; GO:0010226//response to lithium ion; GO:0032869//cellular response to insulin stimulus; GO:0033198//response to ATP; GO:0042866//pyruvate biosynthetic process; GO:0051591//response to cAMP; GO:0061621//canonical glycolysis	GO:0005829//cytosol; GO:0070062//extracellular exosome	GO:0000287//magnesium ion binding; GO:0004743//pyruvate kinase activity; GO:0005524//ATP binding; GO:0016301//kinase activity; GO:0030955//potassium ion binding	K12406 pyruvate kinase isozymes R/L [EC:2.7.1.40] | (RefSeq) PKLR, PK1, PKL, PKRL, RPK; pyruvate kin	http://www.genome.jp/dbget-bin/www_bget?hsa:5313	1.73302	0.00282864	0.00487392	UP	-0.256466	0.841989	0.884243	FALSE	1.98678	0.00290199	0.00494598	UP
EIF2B4	1025	12.8676	913	12.9827	1027	13.4225	1225	16.3487	1523	18.8184	1309	15.8706	1042	13.961	1045	14.0264	1135	14.0354	chr2	27587219	27593324	EIF2B4	8890	translation initiation factor eif-2b subunit delta isoform x1	GO:0001541//ovarian follicle development; GO:0009408//response to heat; GO:0009749//response to glucose; GO:0014003//oligodendrocyte development; GO:0019509//L-methionine biosynthetic process from methylthioadenosine; GO:0032057//negative regulation of translational initiation in response to stress; GO:0042552//myelination; GO:0043434//response to peptide hormone; GO:0043547//positive regulation …	GO:0005829//cytosol; GO:0005851//eukaryotic translation initiation factor 2B complex	GO:0003743//translation initiation factor activity; GO:0005085//guanyl-nucleotide exchange factor activity; GO:0031369//translation initiation factor binding; GO:0046523//S-methyl-5-thioribose-1-phosphate isomerase activity	K03680 translation initiation factor eIF-2B subunit delta | (RefSeq) EIF2B4, EIF-2B, EIF2B, EIF2Bdel	http://www.genome.jp/dbget-bin/www_bget?hsa:8890	0.255582	0.000433574	0.000814431	FALSE	0.162924	0.00592832	0.0100622	FALSE	0.0887102	0.22718	0.283521	FALSE
NFATC2IP	2232	12.5754	1894	12.0873	2117	12.4176	2077	12.4405	2117	11.7397	2171	11.8132	2127	12.79	2175	13.1022	2353	13.0588	chr16	28962318	28977786	NFATC2IP	84901	nfatc2-interacting protein	GO:0001816//cytokine production; GO:0016925//protein sumoylation; GO:0045944//positive regulation of transcription from RNA polymerase II promoter	GO:0005634//nucleus; GO:0005737//cytoplasm	GO:0031386//protein tag	no KO assigned | (RefSeq) NFATC2IP, ESC2, NIP45, RAD60; nuclear factor of activated T cells 2 intera	http://www.genome.jp/dbget-bin/www_bget?hsa:84901	-0.16636	0.000629539	0.00116253	FALSE	0.136013	0.0017952	0.00324111	FALSE	-0.306378	3.42658e-10	9.88815e-10	FALSE
EIF2B2	1391	19.7173	1053	16.9071	1380	20.3652	1425	21.4738	1321	18.4303	1322	18.0981	870	13.1618	783	11.8669	1047	14.6191	chr14	75469612	75476294	EIF2B2	8892	translation initiation factor eif-2b subunit beta	GO:0001541//ovarian follicle development; GO:0006446//regulation of translational initiation; GO:0009408//response to heat; GO:0009749//response to glucose; GO:0014003//oligodendrocyte development; GO:0019509//L-methionine biosynthetic process from methylthioadenosine; GO:0042552//myelination; GO:0043434//response to peptide hormone; GO:0043547//positive regulation of GTPase activity; GO:0051716/…	GO:0005829//cytosol; GO:0005851//eukaryotic translation initiation factor 2B complex	GO:0003743//translation initiation factor activity; GO:0005085//guanyl-nucleotide exchange factor activity; GO:0005515//protein binding; GO:0005524//ATP binding; GO:0005525//GTP binding; GO:0046523//S-methyl-5-thioribose-1-phosphate isomerase activity	K03754 translation initiation factor eIF-2B subunit beta | (RefSeq) EIF2B2, EIF-2Bbeta, EIF2B; eukar	http://www.genome.jp/dbget-bin/www_bget?hsa:8892	-0.0987852	0.230179	0.288247	FALSE	-0.457846	9.39467e-08	2.39392e-07	FALSE	0.35542	4.7335e-05	9.70222e-05	FALSE
EIF2B3	776	9.17738	755	10.114	782	9.62835	963	12.1075	1012	11.78	1002	11.4447	869	10.9686	923	11.6712	953	11.102	chr1	45316194	45452394	EIF2B3	8891	translation initiation factor eif-2b subunit gamma isoform x1	GO:0009408//response to heat; GO:0009749//response to glucose; GO:0014003//oligodendrocyte development; GO:0032057//negative regulation of translational initiation in response to stress; GO:0043434//response to peptide hormone; GO:0043547//positive regulation of GTPase activity	GO:0005829//cytosol; GO:0005851//eukaryotic translation initiation factor 2B complex	GO:0003743//translation initiation factor activity; GO:0005085//guanyl-nucleotide exchange factor activity; GO:0005515//protein binding; GO:0016779//nucleotidyltransferase activity	K03241 translation initiation factor eIF-2B subunit gamma | (RefSeq) EIF2B3, EIF-2B, EIF2Bgamma; euk	http://www.genome.jp/dbget-bin/www_bget?hsa:8891	0.166767	0.0163812	0.0254636	FALSE	0.28844	3.4691e-05	7.34479e-05	FALSE	-0.125766	0.0566928	0.0802731	FALSE
EIF2B1	1295	15.127	1152	15.2425	1507	18.3267	1259	15.6344	1258	14.4634	1369	15.4442	1248	15.5586	1330	16.6108	1373	15.7981	chr12	124105570	124118323	EIF2B1	1967	translation initiation factor eif-2b subunit alpha	GO:0006446//regulation of translational initiation; GO:0009408//response to heat; GO:0009749//response to glucose; GO:0014003//oligodendrocyte development; GO:0019509//L-methionine biosynthetic process from methylthioadenosine; GO:0043434//response to peptide hormone; GO:0043547//positive regulation of GTPase activity; GO:0051716//cellular response to stimulus	GO:0005829//cytosol; GO:0005851//eukaryotic translation initiation factor 2B complex; GO:0005886//plasma membrane	GO:0003743//translation initiation factor activity; GO:0005085//guanyl-nucleotide exchange factor activity; GO:0005515//protein binding; GO:0046523//S-methyl-5-thioribose-1-phosphate isomerase activity	K03239 translation initiation factor eIF-2B subunit alpha | (RefSeq) EIF2B1, EIF2B, EIF2BA; eukaryot	http://www.genome.jp/dbget-bin/www_bget?hsa:1967	-0.219754	0.0040813	0.00689399	FALSE	0.043114	0.561317	0.627386	FALSE	-0.267026	1.09577e-05	2.37368e-05	FALSE
PRKAR2A	6636	33.9074	5998	34.7148	6220	33.0877	4385	23.8193	5076	25.528	5146	25.3944	4019	21.9169	4274	23.3495	4599	23.1475	chr3	48784012	48885283	PRKAR2A	5576	camp-dependent protein kinase type ii-alpha regulatory subunit	GO:0003091//renal water homeostasis; GO:0007596//blood coagulation; GO:0034199//activation of protein kinase A activity; GO:0035556//intracellular signal transduction; GO:0071377//cellular response to glucagon stimulus; GO:2000480//negative regulation of cAMP-dependent protein kinase activity	GO:0005813//centrosome; GO:0005829//cytosol; GO:0005925//focal adhesion; GO:0005952//cAMP-dependent protein kinase complex; GO:0031588//AMP-activated protein kinase complex; GO:0044853//plasma membrane raft; GO:0070062//extracellular exosome; GO:0097546//ciliary base	GO:0004862//cAMP-dependent protein kinase inhibitor activity; GO:0008603//cAMP-dependent protein kinase regulator activity; GO:0016301//kinase activity; GO:0030552//cAMP binding; GO:0031625//ubiquitin protein ligase binding; GO:0034236//protein kinase A catalytic subunit binding	K04739 cAMP-dependent protein kinase regulator | (RefSeq) PRKAR2A, PKR2, PRKAR2; protein kinase cAMP	http://www.genome.jp/dbget-bin/www_bget?hsa:5576	-0.566763	1.65656e-42	1.29681e-41	FALSE	-0.506656	1.44251e-39	1.04708e-38	FALSE	-0.0641733	0.150049	0.194452	FALSE
PRKAR2B	60	0.357994	72	0.486605	56	0.347857	36	0.228349	29	0.170306	55	0.316933	104	0.662265	129	0.822942	106	0.622993	chr7	106685178	106802256	PRKAR2B	5577	camp-dependent protein kinase type ii-beta regulatory subunit	GO:0000086//G2/M transition of mitotic cell cycle; GO:0003091//renal water homeostasis; GO:0006631//fatty acid metabolic process; GO:0007596//blood coagulation; GO:0007612//learning; GO:0034199//activation of protein kinase A activity; GO:0035556//intracellular signal transduction; GO:0071377//cellular response to glucagon stimulus; GO:0097332//response to antipsychotic drug; GO:0097338//response…	GO:0005743//mitochondrial inner membrane; GO:0005813//centrosome; GO:0005829//cytosol; GO:0005886//plasma membrane; GO:0005952//cAMP-dependent protein kinase complex; GO:0043025//neuronal cell body; GO:0043197//dendritic spine; GO:0043198//dendritic shaft; GO:0045121//membrane raft; GO:0048471//perinuclear region of cytoplasm; GO:0070062//extracellular exosome; GO:0097546//ciliary base	GO:0004862//cAMP-dependent protein kinase inhibitor activity; GO:0008603//cAMP-dependent protein kinase regulator activity; GO:0016301//kinase activity; GO:0019904//protein domain specific binding; GO:0030552//cAMP binding; GO:0031625//ubiquitin protein ligase binding; GO:0034236//protein kinase A catalytic subunit binding	K04739 cAMP-dependent protein kinase regulator | (RefSeq) PRKAR2B, PRKAR2, RII-BETA; protein kinase	http://www.genome.jp/dbget-bin/www_bget?hsa:5577	-0.851793	0.00117701	0.00211577	FALSE	0.889494	1.104e-05	2.43137e-05	FALSE	-1.74405	6.34048e-14	2.1856e-13	DOWN
TMEM200C	0	0	2	0.0257735	4	0.0473774	2	0.0241894	0	0	1	0.0109876	3	0.0364265	4	0.0486562	9	0.10086	chr18	5890184	5892103	TMEM200C	645369	transmembrane protein 200c	-	GO:0016021//integral component of membrane	-	no KO assigned | (RefSeq) TMEM200C, TTMA; transmembrane protein 200C	http://www.genome.jp/dbget-bin/www_bget?hsa:645369	-1.09802	0.547962	0.605557	FALSE	1.38728	0.107479	0.149061	FALSE	-2.49029	0.0122368	0.0193084	DOWN
TXNIP	1787	14.026	1519	13.5048	1753	14.3245	29190	243.566	30781	237.794	32055	242.989	16965	142.115	18105	151.937	17279	133.593	chr1	145438438	145442644	TXNIP	10628	thioredoxin-interacting protein	GO:0000122//negative regulation of transcription from RNA polymerase II promoter; GO:0006606//protein import into nucleus; GO:0007049//cell cycle; GO:0009612//response to mechanical stimulus; GO:0009749//response to glucose; GO:0030216//keratinocyte differentiation; GO:0032355//response to estradiol; GO:0032570//response to progesterone; GO:0042127//regulation of cell proliferation; GO:0042493//r…	GO:0005634//nucleus; GO:0005758//mitochondrial intermembrane space; GO:0005829//cytosol	GO:0004857//enzyme inhibitor activity; GO:0031625//ubiquitin protein ligase binding	K20910 thioredoxin-interacting protein | (RefSeq) TXNIP, ARRDC6, EST01027, HHCPA78, THIF, VDUP1; thi	http://www.genome.jp/dbget-bin/www_bget?hsa:10628	3.98984	0	0	UP	3.41771	0	0	UP	0.568302	2.5819e-37	1.82668e-36	FALSE
TMEM200B	6	0.0520085	4	0.0392738	2	0.0180485	4	0.03686	10	0.0853161	9	0.0753435	0	0	2	0.0185357	0	0	chr1	29445937	29450421	TMEM200B	399474	transmembrane protein 200b	-	GO:0016021//integral component of membrane	-	no KO assigned | (RefSeq) TMEM200B, TTMB; transmembrane protein 200B	http://www.genome.jp/dbget-bin/www_bget?hsa:399474	0.721599	0.316192	0.381964	FALSE	-2.33646	0.0276588	0.042635	DOWN	3.06598	0.000705556	0.00128747	UP
MALRD1	0	0	0	0	0	0	0	0	0	0	0	0	0	0	0	0	0	0	chr10	19337700	20023407	MALRD1	340895	mam and ldl-receptor class a domain-containing protein 1	GO:0042632//cholesterol homeostasis; GO:0070858//negative regulation of bile acid biosynthetic process	GO:0005737//cytoplasm; GO:0016021//integral component of membrane	-	no KO assigned | (RefSeq) MALRD1, C10orf112, DIET1, bA265G8.2; MAM and LDL receptor class A domain c	http://www.genome.jp/dbget-bin/www_bget?hsa:340895	-	-	-	-	-	-	-	-	-	-	-	-
MLF1	876	8.29431	806	8.64433	894	8.81256	295	2.96941	331	3.08469	380	3.47488	526	5.3154	431	4.36324	572	5.33489	chr3	158288953	158324249	MLF1	4291	myeloid leukemia factor 1 isoform x1	GO:0002318//myeloid progenitor cell differentiation; GO:0006351//transcription, DNA-templated; GO:0007050//cell cycle arrest	GO:0005634//nucleus; GO:0005737//cytoplasm	GO:0003677//DNA binding; GO:0019904//protein domain specific binding	K15622 myeloid leukemia factor 1 | (RefSeq) MLF1; myeloid leukemia factor 1	http://www.genome.jp/dbget-bin/www_bget?hsa:4291	-1.55479	2.6426e-76	3.6464e-75	DOWN	-0.712098	1.38191e-16	5.29501e-16	FALSE	-0.847092	1.04827e-14	3.75195e-14	FALSE
QPRT	4033	43.0783	3556	43.0242	3733	41.5123	3478	39.4941	3462	36.397	3566	36.7868	4439	50.6046	4880	55.7322	5130	53.9761	chr16	29690329	29710020	QPRT	-	nicotinate-nucleotide pyrophosphorylase	GO:0009435//NAD biosynthetic process; GO:0034213//quinolinate catabolic process; GO:0051259//protein oligomerization	GO:0005829//cytosol; GO:0070062//extracellular exosome	GO:0004514//nicotinate-nucleotide diphosphorylase (carboxylating) activity; GO:0042803//protein homodimerization activity	-	-	-0.302757	3.74619e-12	1.17862e-11	FALSE	0.394458	1.21771e-20	5.3852e-20	FALSE	-0.701107	1.04442e-46	9.08338e-46	FALSE
IFT140	1920	7.96121	1636	7.6839	1714	7.39907	1171	5.16187	1250	5.10148	1228	4.91764	922	4.08021	947	4.1984	1157	4.72568	chr16	1560428	1662109	IFT140	9742	intraflagellar transport protein 140 homolog isoform x1	GO:0007368//determination of left/right symmetry; GO:0007507//heart development; GO:0008589//regulation of smoothened signaling pathway; GO:0021532//neural tube patterning; GO:0035108//limb morphogenesis; GO:0035721//intraciliary retrograde transport; GO:0035845//photoreceptor cell outer segment organization; GO:0048705//skeletal system morphogenesis; GO:0060041//retina development in camera-type…	GO:0001750//photoreceptor outer segment; GO:0005737//cytoplasm; GO:0005813//centrosome; GO:0005930//axoneme; GO:0030991//intraciliary transport particle A; GO:0031514//motile cilium; GO:0032391//photoreceptor connecting cilium; GO:0036064//ciliary basal body; GO:0097542//ciliary tip	-	K19672 intraflagellar transport protein 140 | (RefSeq) IFT140, MZSDS, RP80, SRTD9, WDTC2, c305C8.4,	http://www.genome.jp/dbget-bin/www_bget?hsa:9742	-0.725258	8.42194e-39	6.04728e-38	FALSE	-0.759033	4.10261e-34	2.62217e-33	FALSE	0.030135	0.665394	0.717949	FALSE
MLF2	3230	50.7223	2892	51.4417	2860	46.7575	3160	52.7541	3243	50.1247	3070	46.5602	2571	43.0896	2446	41.0685	2863	44.2865	chr12	6857158	6862082	MLF2	8079	myeloid leukemia factor 2	GO:0006952//defense response	GO:0005634//nucleus; GO:0005737//cytoplasm; GO:0016020//membrane	GO:0005515//protein binding	no KO assigned | (RefSeq) MLF2, NTN4; myeloid leukemia factor 2	http://www.genome.jp/dbget-bin/www_bget?hsa:8079	-0.118045	0.0305311	0.0455503	FALSE	-0.147721	0.00222001	0.00396843	FALSE	0.025822	0.629067	0.684315	FALSE
TMEM14C	858	15.8829	823	17.2569	967	18.6362	1007	19.8172	998	18.1836	984	17.5921	641	12.6641	610	12.0733	654	11.9254	chr6	10723148	10731362	TMEM14C	51522	transmembrane protein 14c	GO:0006839//mitochondrial transport; GO:0030218//erythrocyte differentiation; GO:0070453//regulation of heme biosynthetic process	GO:0005743//mitochondrial inner membrane; GO:0016021//integral component of membrane	GO:0005515//protein binding	no KO assigned | (RefSeq) TMEM14C, C6orf53, HSPC194, MSTP073, NET26, bA421M1.6; transmembrane protei	http://www.genome.jp/dbget-bin/www_bget?hsa:51522	-0.0205601	0.797065	0.836837	FALSE	-0.432781	4.07357e-08	1.05894e-07	FALSE	0.408081	5.19701e-08	1.3261e-07	FALSE
TMEM14B	546	11.3912	487	11.5087	544	11.8158	569	12.6201	551	11.3145	484	9.7522	511	11.3782	448	9.99334	521	10.707	chr6	10747992	10760007	TMEM14B	81853	transmembrane protein 14b	-	GO:0016021//integral component of membrane	-	no KO assigned | (RefSeq) TMEM14B; transmembrane protein 14B	http://www.genome.jp/dbget-bin/www_bget?hsa:81853	-0.167635	0.0973752	0.132558	FALSE	-0.0486852	0.571968	0.638261	FALSE	-0.122661	0.250643	0.309866	FALSE
TMEM14A	278	5.98277	247	6.02109	268	6.00455	193	4.41557	177	3.7492	190	3.94904	194	4.45588	192	4.41789	178	3.77338	chr6	52535884	52551386	TMEM14A	28978	transmembrane protein 14a	-	GO:0016021//integral component of membrane	GO:0000166//nucleotide binding; GO:0005515//protein binding	no KO assigned | (RefSeq) TMEM14A, C6orf73, PTD011; transmembrane protein 14A	http://www.genome.jp/dbget-bin/www_bget?hsa:28978	-0.69618	1.21436e-09	3.37217e-09	FALSE	-0.44621	0.000197677	0.000393015	FALSE	-0.253863	0.0554689	0.0786844	FALSE
CFLAR	24341	65.5604	20381	62.1797	23737	66.5606	22392	64.1162	26280	69.6685	26499	68.9307	25063	72.046	23624	68.0318	25890	68.6892	chr2	201980827	202037411	CFLAR	8837	inosine-5 -monophosphate dehydrogenase 1 isoform x2	GO:0006508//proteolysis; GO:0006915//apoptotic process; GO:0006996//organelle organization; GO:0007519//skeletal muscle tissue development; GO:0009168//purine ribonucleoside monophosphate biosynthetic process; GO:0014732//skeletal muscle atrophy; GO:0014842//regulation of satellite cell proliferation; GO:0014866//skeletal myofibril assembly; GO:0016032//viral process; GO:0032199//reverse transcri…	GO:0005634//nucleus; GO:0005654//nucleoplasm; GO:0005737//cytoplasm; GO:0005829//cytosol; GO:0030054//cell junction; GO:0031265//CD95 death-inducing signaling complex; GO:0045121//membrane raft; GO:0097342//ripoptosome	GO:0002020//protease binding; GO:0003677//DNA binding; GO:0003938//IMP dehydrogenase activity; GO:0003964//RNA-directed DNA polymerase activity; GO:0005123//death receptor binding; GO:0005515//protein binding; GO:0008047//enzyme activator activity; GO:0009036//Type II site-specific deoxyribonuclease activity; GO:0032403//protein complex binding; GO:0046872//metal ion binding; GO:0097159//organic …	K04724 CASP8 and FADD-like apoptosis regulator | (RefSeq) CFLAR, CASH, CASP8AP1, CLARP, Casper, FLAM	http://www.genome.jp/dbget-bin/www_bget?hsa:8837	-0.0614259	0.138162	0.183302	FALSE	0.168765	1.67391e-06	3.91355e-06	FALSE	-0.234256	9.89251e-09	2.62965e-08	FALSE
MECOM	0	0	0	0	0	0	0	0	0	0	0	0	0	0	2	0.00910703	0	0	chr3	168801287	169381563	MECOM	2122	mds1 and evi1 complex locus protein evi1 isoform x1	GO:0001503//ossification; GO:0002062//chondrocyte differentiation; GO:0006915//apoptotic process; GO:0030154//cell differentiation; GO:0030512//negative regulation of transforming growth factor beta receptor signaling pathway; GO:0030853//negative regulation of granulocyte differentiation; GO:0030854//positive regulation of granulocyte differentiation; GO:0032743//positive regulation of interleuk…	GO:0000118//histone deacetylase complex; GO:0005794//Golgi apparatus; GO:0005829//cytosol; GO:0016235//aggresome; GO:0016607//nuclear speck	GO:0000977//RNA polymerase II regulatory region sequence-specific DNA binding; GO:0001047//core promoter binding; GO:0001228//transcriptional activator activity, RNA polymerase II transcription regulatory region sequence-specific binding; GO:0003677//DNA binding; GO:0003700//transcription factor activity, sequence-specific DNA binding; GO:0005509//calcium ion binding; GO:0005524//ATP binding; GO:…	K04462 ecotropic virus integration site 1 protein | (RefSeq) MECOM, AML1-EVI-1, EVI1, KMT8E, MDS1, M	http://www.genome.jp/dbget-bin/www_bget?hsa:2122	-	-	-	-	2.6848	0.510174	0.576575	FALSE	-2.77441	0.511973	0.570784	FALSE
ITGA2B	31	0.197363	15	0.108172	23	0.152447	33	0.223352	30	0.187989	30	0.184461	9	0.0611533	10	0.0680705	19	0.119154	chr17	42449549	42466969	ITGA2B	3674	integrin alpha-iib	GO:0002576//platelet degranulation; GO:0002687//positive regulation of leukocyte migration; GO:0007160//cell-matrix adhesion; GO:0007229//integrin-mediated signaling pathway; GO:0030198//extracellular matrix organization; GO:0070527//platelet aggregation	GO:0005925//focal adhesion; GO:0008305//integrin complex; GO:0009897//external side of plasma membrane; GO:0031092//platelet alpha granule membrane; GO:0070062//extracellular exosome; GO:0072562//blood microparticle	GO:0042802//identical protein binding; GO:0046872//metal ion binding; GO:0050840//extracellular matrix binding; GO:0070051//fibrinogen binding	K06476 integrin alpha 2B | (RefSeq) ITGA2B, BDPLT16, BDPLT2, CD41, CD41B, GP2B, GPIIb, GT, GTA, HPA3	http://www.genome.jp/dbget-bin/www_bget?hsa:3674	0.242183	0.426756	0.497961	FALSE	-0.808114	0.0420203	0.0627495	FALSE	1.04834	0.00247531	0.00425763	UP
RSPH1	7	0.111366	4	0.0720831	0	0	0	0	2	0.0313178	0	0	8	0.135837	3	0.0510305	8	0.125371	chr21	43892596	43916464	RSPH1	89765	radial spoke head 1 homolog isoform x2	GO:0007286//spermatid development; GO:0035082//axoneme assembly; GO:0051321//meiotic cell cycle	GO:0000794//condensed nuclear chromosome; GO:0001520//outer dense fiber; GO:0005829//cytosol; GO:0072687//meiotic spindle	GO:0005515//protein binding	K19755 radial spoke head protein 1 | (RefSeq) RSPH1, CT79, RSP44, RSPH10A, TSA2, TSGA2; radial spoke	http://www.genome.jp/dbget-bin/www_bget?hsa:89765	-2.43541	0.029406	0.0439687	DOWN	0.8105	0.315823	0.389067	FALSE	-3.24775	0.0012349	0.00219472	DOWN
FANCE	3577	30.581	3100	30.0203	3465	30.8407	1543	14.024	1465	12.3276	1544	12.7485	1546	14.1064	1443	13.1903	1669	14.0554	chr6	35420138	35434881	FANCE	2178	fanconi anemia group e protein isoform x2	GO:0036297//interstrand cross-link repair	GO:0043240//Fanconi anaemia nuclear complex	-	K10892 fanconi anemia group E protein | (RefSeq) FANCE, FACE, FAE; FA complementation group E	http://www.genome.jp/dbget-bin/www_bget?hsa:2178	-1.34941	3.13854e-146	9.65356e-145	DOWN	-1.07944	1.22706e-132	3.20983e-131	DOWN	-0.273644	1.30977e-05	2.81501e-05	FALSE
KCNE5	6	0.0892182	4	0.0673724	3	0.0464421	33	0.521661	22	0.321983	42	0.603159	14	0.22218	9	0.143087	9	0.131825	chrX	108866929	108868397	KCNE5	23630	potassium voltage-gated channel subfamily e member 1-like protein	GO:0060307//regulation of ventricular cardiac muscle cell membrane repolarization; GO:0060372//regulation of atrial cardiac muscle cell membrane repolarization; GO:0071435//potassium ion export; GO:0086005//ventricular cardiac muscle cell action potential; GO:0086013//membrane repolarization during cardiac muscle cell action potential; GO:0086014//atrial cardiac muscle cell action potential; GO:0…	GO:0008076//voltage-gated potassium channel complex	GO:0015459//potassium channel regulator activity; GO:0044325//ion channel binding; GO:0086008//voltage-gated potassium channel activity involved in cardiac muscle cell action potential repolarization	K04895 potassium voltage-gated channel Isk-related subfamily E member 1-like | (RefSeq) KCNE5, KCNE1	http://www.genome.jp/dbget-bin/www_bget?hsa:23630	2.67236	2.39418e-09	6.51581e-09	UP	1.32192	0.0201108	0.031705	UP	1.34467	0.000510202	0.000945412	UP
LURAP1	1	0.0118137	0	0	0	0	0	0	1	0.0116277	1	0.0114095	0	0	0	0	0	0	chr1	46669006	46686928	LURAP1	541468	leucine rich adaptor protein 1	GO:0001819//positive regulation of cytokine production; GO:0016477//cell migration; GO:0031032//actomyosin structure organization; GO:0043123//positive regulation of I-kappaB kinase/NF-kappaB signaling	GO:0005737//cytoplasm; GO:0042641//actomyosin	GO:0005515//protein binding	no KO assigned | (RefSeq) LURAP1, C1orf190, LRAP35a, LRP35A; leucine rich adaptor protein 1	http://www.genome.jp/dbget-bin/www_bget?hsa:541468	0.635176	1	1	FALSE	-	-	-	-	2.56213	0.511973	0.570784	FALSE
TPBGL	12	0.0936153	13	0.114876	15	0.121827	64	0.530784	76	0.583562	56	0.421924	77	0.641107	51	0.425394	106	0.814563	chr11	74951950	74954749	TPBGL	100507050	trophoblast glyco	GO:0035385//Roundabout signaling pathway; GO:0048846//axon extension involved in axon guidance; GO:0050770//regulation of axonogenesis	GO:0005578//proteinaceous extracellular matrix; GO:0005615//extracellular space; GO:0016021//integral component of membrane	GO:0008201//heparin binding; GO:0048495//Roundabout binding	no KO assigned | (RefSeq) TPBGL; trophoblast glycoprotein like	http://www.genome.jp/dbget-bin/www_bget?hsa:100507050	2.08776	1.62441e-13	5.43086e-13	UP	2.56926	3.38364e-15	1.22671e-14	UP	-0.487281	0.0557362	0.0790372	FALSE
C9orf129	2	0.0378572	5	0.107203	2	0.0394127	5	0.100614	1	0.0186306	4	0.0731237	0	0	0	0	3	0.0559361	chr9	96080481	96108696	C9orf129	445577	uncharacterized protein c9orf129 isoform x1	-	GO:0005634//nucleus; GO:0005737//cytoplasm; GO:0005886//plasma membrane	GO:0044822//poly(A) RNA binding	no KO assigned | (RefSeq) C9orf129, bA165J3.3; chromosome 9 open reading frame 129	http://www.genome.jp/dbget-bin/www_bget?hsa:445577	-0.0482873	1	1	FALSE	-1.45336	0.193518	0.251666	FALSE	1.41033	0.20155	0.254611	FALSE
MYT1L	0	0	0	0	0	0	0	0	0	0	0	0	0	0	0	0	0	0	chr2	1792885	2335085	MYT1L	23040	myelin transcription factor 1-like protein isoform x6	GO:0006355//regulation of transcription, DNA-templated; GO:0007399//nervous system development; GO:0030154//cell differentiation	GO:0005634//nucleus	GO:0003677//DNA binding; GO:0003700//transcription factor activity, sequence-specific DNA binding; GO:0008270//zinc ion binding	K23193 myelin transcription factor 1-like protein | (RefSeq) MYT1L, MRD39, NZF1, ZC2H2C2, ZC2HC4B, m	http://www.genome.jp/dbget-bin/www_bget?hsa:23040	-	-	-	-	-	-	-	-	-	-	-	-
ABCA12	2	0.00508404	4	0.0115175	2	0.00529294	7	0.0189169	5	0.01251	1	0.00245504	10	0.0271302	6	0.0163074	15	0.0375598	chr2	215796266	216003151	ABCA12	26154	atp-binding cassette sub-family a member 12	GO:0010875//positive regulation of cholesterol efflux; GO:0019725//cellular homeostasis; GO:0031424//keratinization; GO:0033700//phospholipid efflux; GO:0035627//ceramide transport; GO:0043129//surfactant homeostasis; GO:0045055//regulated secretory pathway; GO:0048286//lung alveolus development; GO:0055085//transmembrane transport; GO:0055088//lipid homeostasis; GO:0061436//establishment of skin…	GO:0005743//mitochondrial inner membrane; GO:0005829//cytosol; GO:0005886//plasma membrane; GO:0016021//integral component of membrane; GO:0097209//epidermal lamellar body	GO:0005524//ATP binding; GO:0034040//lipid-transporting ATPase activity; GO:0034191//apolipoprotein A-I receptor binding	K05646 ATP-binding cassette, subfamily A (ABC1), member 12 | (RefSeq) ABCA12, ARCI4A, ARCI4B, ICR2B,	http://www.genome.jp/dbget-bin/www_bget?hsa:26154	0.490049	0.721976	0.768397	FALSE	1.93566	0.00256129	0.00454143	UP	-1.45019	0.0223641	0.0340704	DOWN
CLIC6	266	1.43148	176	1.07285	220	1.23258	238	1.36161	308	1.63141	232	1.20579	407	2.33762	405	2.33032	385	2.04089	chr21	36041462	36090525	CLIC6	54102	chloride intracellular channel protein 6	GO:0006749//glutathione metabolic process; GO:0034765//regulation of ion transmembrane transport; GO:1902476//chloride transmembrane transport	GO:0005634//nucleus; GO:0005737//cytoplasm; GO:0005886//plasma membrane; GO:0034707//chloride channel complex; GO:0070062//extracellular exosome	GO:0004364//glutathione transferase activity; GO:0005244//voltage-gated ion channel activity; GO:0005254//chloride channel activity; GO:0050780//dopamine receptor binding	K05026 chloride intracellular channel protein 6 | (RefSeq) CLIC6, CLIC1L; chloride intracellular cha	http://www.genome.jp/dbget-bin/www_bget?hsa:54102	0.0434981	0.775032	0.817305	FALSE	0.90563	1.74918e-13	5.94992e-13	FALSE	-0.866802	5.44226e-12	1.72612e-11	FALSE
PHACTR4	791	2.78547	641	2.55682	818	2.99891	2046	7.65949	2247	7.78813	2401	8.16572	1251	4.70168	1183	4.45413	1297	4.49899	chr1	28696093	28826881	PHACTR4	65979	phosphatase and actin regulator 4 isoform x2	GO:0001755//neural crest cell migration; GO:0001843//neural tube closure; GO:0007266//Rho protein signal transduction; GO:0030036//actin cytoskeleton organization; GO:0043085//positive regulation of catalytic activity; GO:0043086//negative regulation of catalytic activity; GO:0048484//enteric nervous system development; GO:0051726//regulation of cell cycle; GO:0061386//closure of optic fissure; G…	GO:0005737//cytoplasm; GO:0030027//lamellipodium	GO:0003779//actin binding; GO:0004864//protein phosphatase inhibitor activity; GO:0008157//protein phosphatase 1 binding	K17585 phosphatase and actin regulator 4 | (RefSeq) PHACTR4, PPP1R124; phosphatase and actin regulat	http://www.genome.jp/dbget-bin/www_bget?hsa:65979	1.37754	4.75577e-103	9.31174e-102	UP	0.775089	1.14043e-29	6.53125e-29	FALSE	0.598634	3.91113e-28	2.2111e-27	FALSE
CLIC4	10860	53.5005	9758	54.4514	10747	55.1193	10711	56.0958	12385	60.0526	12670	60.2816	17105	89.9343	16627	87.5785	17366	84.2716	chr1	25071760	25170815	CLIC4	25932	chloride intracellular channel protein 4	GO:0001525//angiogenesis; GO:0001886//endothelial cell morphogenesis; GO:0006749//glutathione metabolic process; GO:0006915//apoptotic process; GO:0007035//vacuolar acidification; GO:0009566//fertilization; GO:0030216//keratinocyte differentiation; GO:0030336//negative regulation of cell migration; GO:0034765//regulation of ion transmembrane transport; GO:0035088//establishment or maintenance of …	GO:0005739//mitochondrion; GO:0005813//centrosome; GO:0005829//cytosol; GO:0005886//plasma membrane; GO:0005902//microvillus; GO:0005911//cell-cell junction; GO:0009986//cell surface; GO:0015629//actin cytoskeleton; GO:0016363//nuclear matrix; GO:0030496//midbody; GO:0030659//cytoplasmic vesicle membrane; GO:0034707//chloride channel complex; GO:0045177//apical part of cell; GO:0048471//perinucle…	GO:0004364//glutathione transferase activity; GO:0005244//voltage-gated ion channel activity; GO:0005254//chloride channel activity; GO:0032403//protein complex binding	K05024 chloride intracellular channel protein 4 | (RefSeq) CLIC4, CLIC4L, H1, MTCLIC, huH1, p64H1; c	http://www.genome.jp/dbget-bin/www_bget?hsa:25932	-0.00894773	0.81811	0.855957	FALSE	0.747933	2.48977e-103	4.68048e-102	FALSE	-0.761019	7.90777e-78	1.08813e-76	FALSE
CFHR1	0	0	0	0	0	0	0	0	3	0.0497294	0	0	0	0	0	0	0	0	chr1	196788861	196801319	CFHR1	3078	complement factor h-related 1	GO:0006956//complement activation	GO:0070062//extracellular exosome; GO:0072562//blood microparticle	-	K23815 complement factor H-related protein 1/2/3 | (RefSeq) CFHR1, CFHL, CFHL1, CFHL1P, CFHR1P, FHR1	http://www.genome.jp/dbget-bin/www_bget?hsa:3078	3.08347	0.26681	0.327573	FALSE	-	-	-	-	3.06411	0.267959	0.327887	FALSE
NLGN2	1015	4.77211	833	4.43619	928	4.54235	656	3.27884	765	3.54009	738	3.35105	586	2.94047	622	3.12673	736	3.4086	chr17	7311502	7323183	NLGN2	57555	neuroligin-2 isoform x1	GO:0001966//thigmotaxis; GO:0002087//regulation of respiratory gaseous exchange by neurological system process; GO:0007158//neuron cell-cell adhesion; GO:0007420//brain development; GO:0007630//jump response; GO:0008284//positive regulation of cell proliferation; GO:0019233//sensory perception of pain; GO:0032024//positive regulation of insulin secretion; GO:0032230//positive regulation of synapt…	GO:0005615//extracellular space; GO:0005737//cytoplasm; GO:0009986//cell surface; GO:0030054//cell junction; GO:0042734//presynaptic membrane; GO:0043198//dendritic shaft; GO:0060076//excitatory synapse; GO:0060077//inhibitory synapse; GO:0097470//ribbon synapse	GO:0004872//receptor activity; GO:0042043//neurexin family protein binding; GO:0050839//cell adhesion molecule binding; GO:0052689//carboxylic ester hydrolase activity	K07378 neuroligin | (RefSeq) NLGN2; neuroligin 2	http://www.genome.jp/dbget-bin/www_bget?hsa:57555	-0.557889	1.08388e-15	3.96196e-15	FALSE	-0.471156	1.9356e-10	5.75045e-10	FALSE	-0.0905427	0.273278	0.333843	FALSE
OR2K2	0	0	0	0	0	0	4	0.0976732	0	0	0	0	0	0	4	0.0982333	0	0	chr9	114089763	114090713	OR2K2	26248	olfactory receptor 2k2	GO:0007186//G-protein coupled receptor signaling pathway; GO:0050911//detection of chemical stimulus involved in sensory perception of smell	GO:0005886//plasma membrane; GO:0016021//integral component of membrane	GO:0004930//G-protein coupled receptor activity; GO:0004984//olfactory receptor activity	K04257 olfactory receptor | (RefSeq) OR2K2, HSHTPCRH06, HTPCRH06, OR2AN1P, OR2AR1P; olfactory recept	http://www.genome.jp/dbget-bin/www_bget?hsa:26248	3.47055	0.141991	0.18553	FALSE	3.57064	0.14041	0.188266	FALSE	-0.21623	1	1	FALSE
LRSAM1	836	5.85859	749	5.94551	791	5.77101	854	6.36234	897	6.1871	804	5.44156	858	6.41724	864	6.47376	891	6.15061	chr9	130213765	130265780	LRSAM1	90678	e3 ubiquitin-protein ligase lrsam1 isoform x1	GO:0000209//protein polyubiquitination; GO:0030163//protein catabolic process; GO:0045806//negative regulation of endocytosis; GO:0046755//viral budding; GO:0051865//protein autoubiquitination; GO:0070086//ubiquitin-dependent endocytosis; GO:1904417//positive regulation of xenophagy; GO:2000786//positive regulation of autophagosome assembly	GO:0005737//cytoplasm; GO:0016020//membrane	GO:0005515//protein binding; GO:0008270//zinc ion binding; GO:0016874//ligase activity; GO:0061630//ubiquitin protein ligase activity	K10641 E3 ubiquitin-protein ligase LRSAM1 [EC:2.3.2.27] | (RefSeq) LRSAM1, CMT2P, RIFLE, TAL; leucin	http://www.genome.jp/dbget-bin/www_bget?hsa:90678	-0.0896683	0.243217	0.30334	FALSE	0.180666	0.0055312	0.00942082	FALSE	-0.274296	0.00034865	0.000657014	FALSE
[truncated: 18,748 more rows]

## Sheet: Ctrl vs. sh up
GeneID	logFC	AveExpr	t	P.Value	adj.P.Val	B
ADAMTS14	1.43121	1.50375	5.61612	0.000491054	0.00359792	-0.619457
ADAMTS7	2.36992	3.28269	11.8608	2.23838e-06	6.61606e-05	5.26597
AOC1	1.94137	2.76513	6.01788	0.000310248	0.00254084	-0.11909
BCAN	1.16656	2.60939	10.0303	7.97953e-06	0.000158422	3.88277
BMP1	1.22621	6.05201	8.34571	3.11372e-05	0.000435018	2.39472
CCL5	1.68174	9.4589	6.92826	0.000117923	0.00119591	0.937627
CD55	1.31411	5.35954	12.3344	1.65803e-06	5.39778e-05	5.5912
CD9	2.79391	6.09814	40.6585	1.33666e-10	1.44961e-07	14.9812
CHIT1	2.45392	4.24209	4.80005	0.00133484	0.00785959	-1.7047
[truncated: 320 more rows]

## Sheet: Ctrl vs. sh up pathway
Description	%InGO	p	counts
[truncated: 13 more rows]

[truncated: 2 more sheets: Secreted proteins, Secreted proteins pathway]
